# Supplementary material
Source: publisher figshare collection journal article supplement (https://diabetesjournals.figshare.com/articles/dataset/_/24281998)

Bionic Pancreas (ID: CF-MGH-01-IP61\_Wk1, BM=55 kg), Insulin Only, 29-Sep-2021 17:00 to 06-Oct-2021 16:55[+7.0]

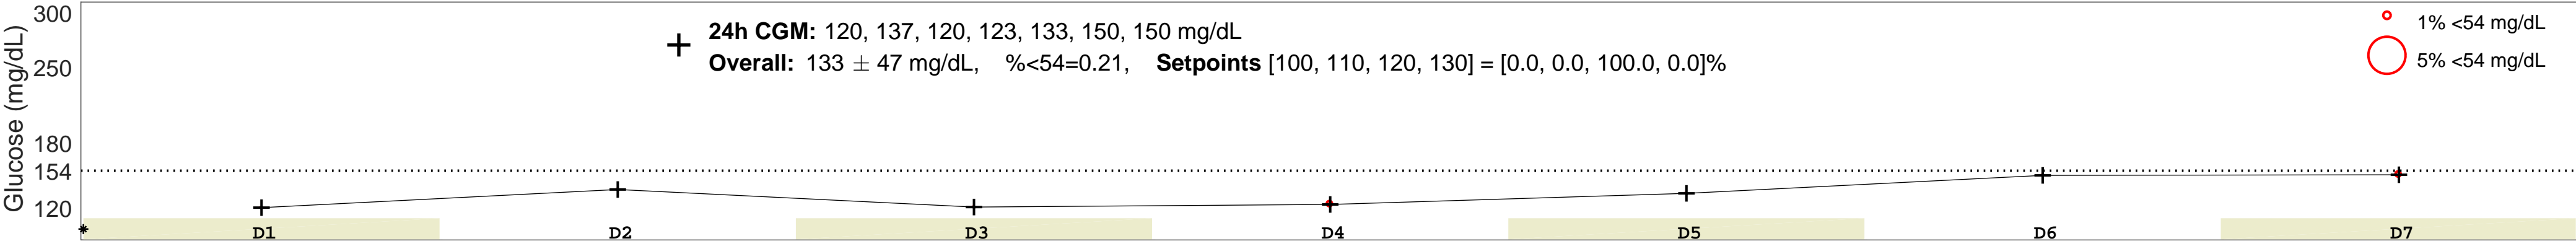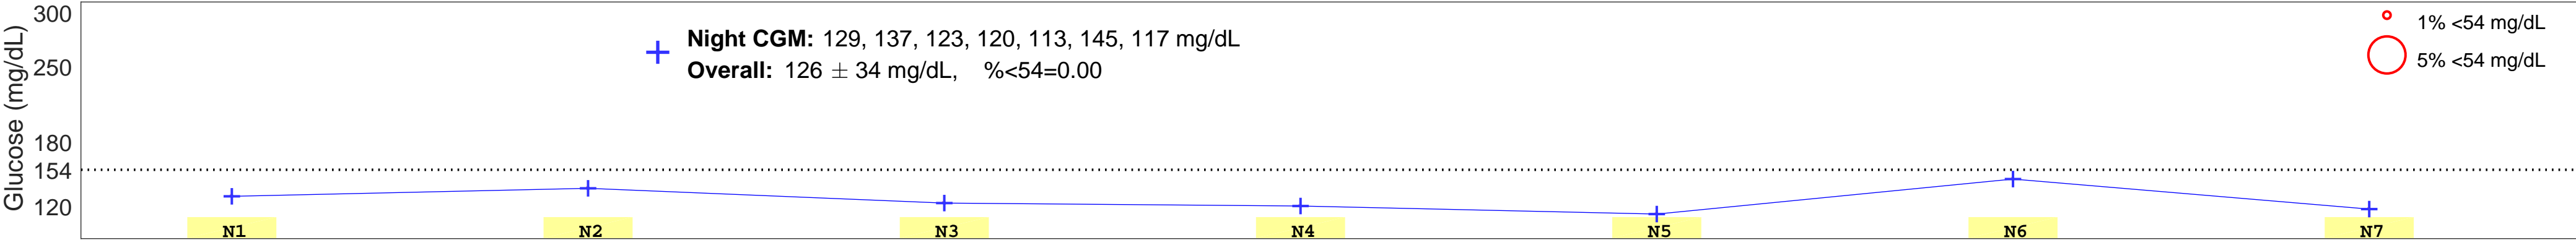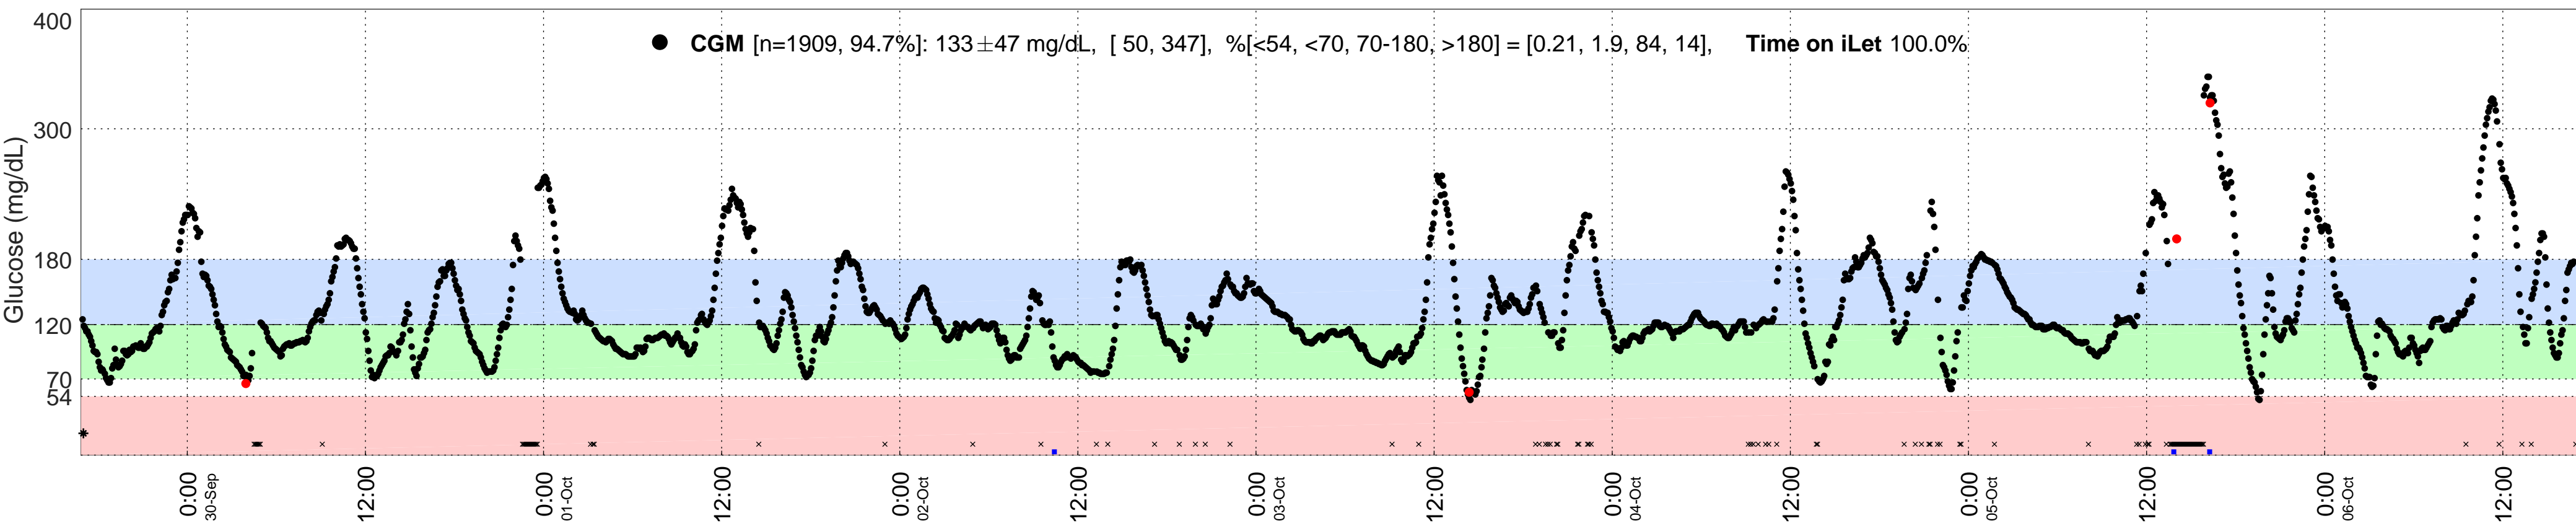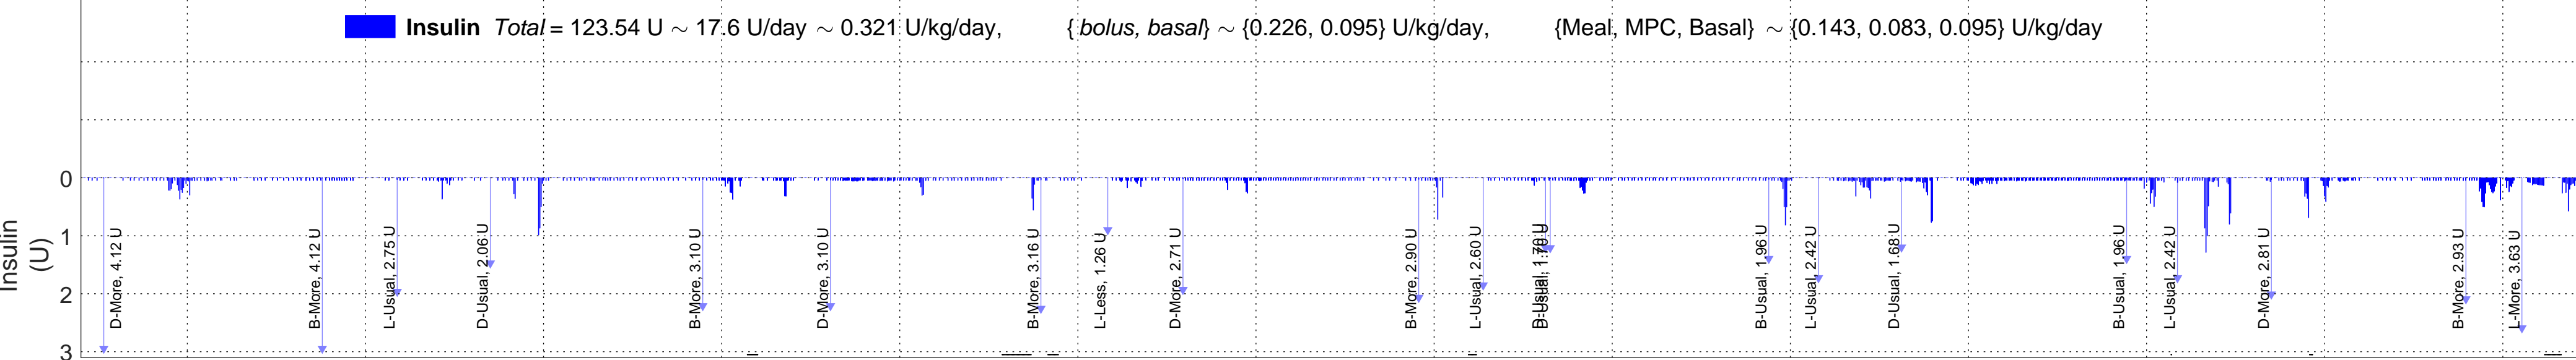

Bionic Pancreas (ID: CF-MGH-01-IP61\_Wk2, BM=55 kg), Insulin Only, 06-Oct-2021 17:00 to 13-Oct-2021 15:05[+6.9]

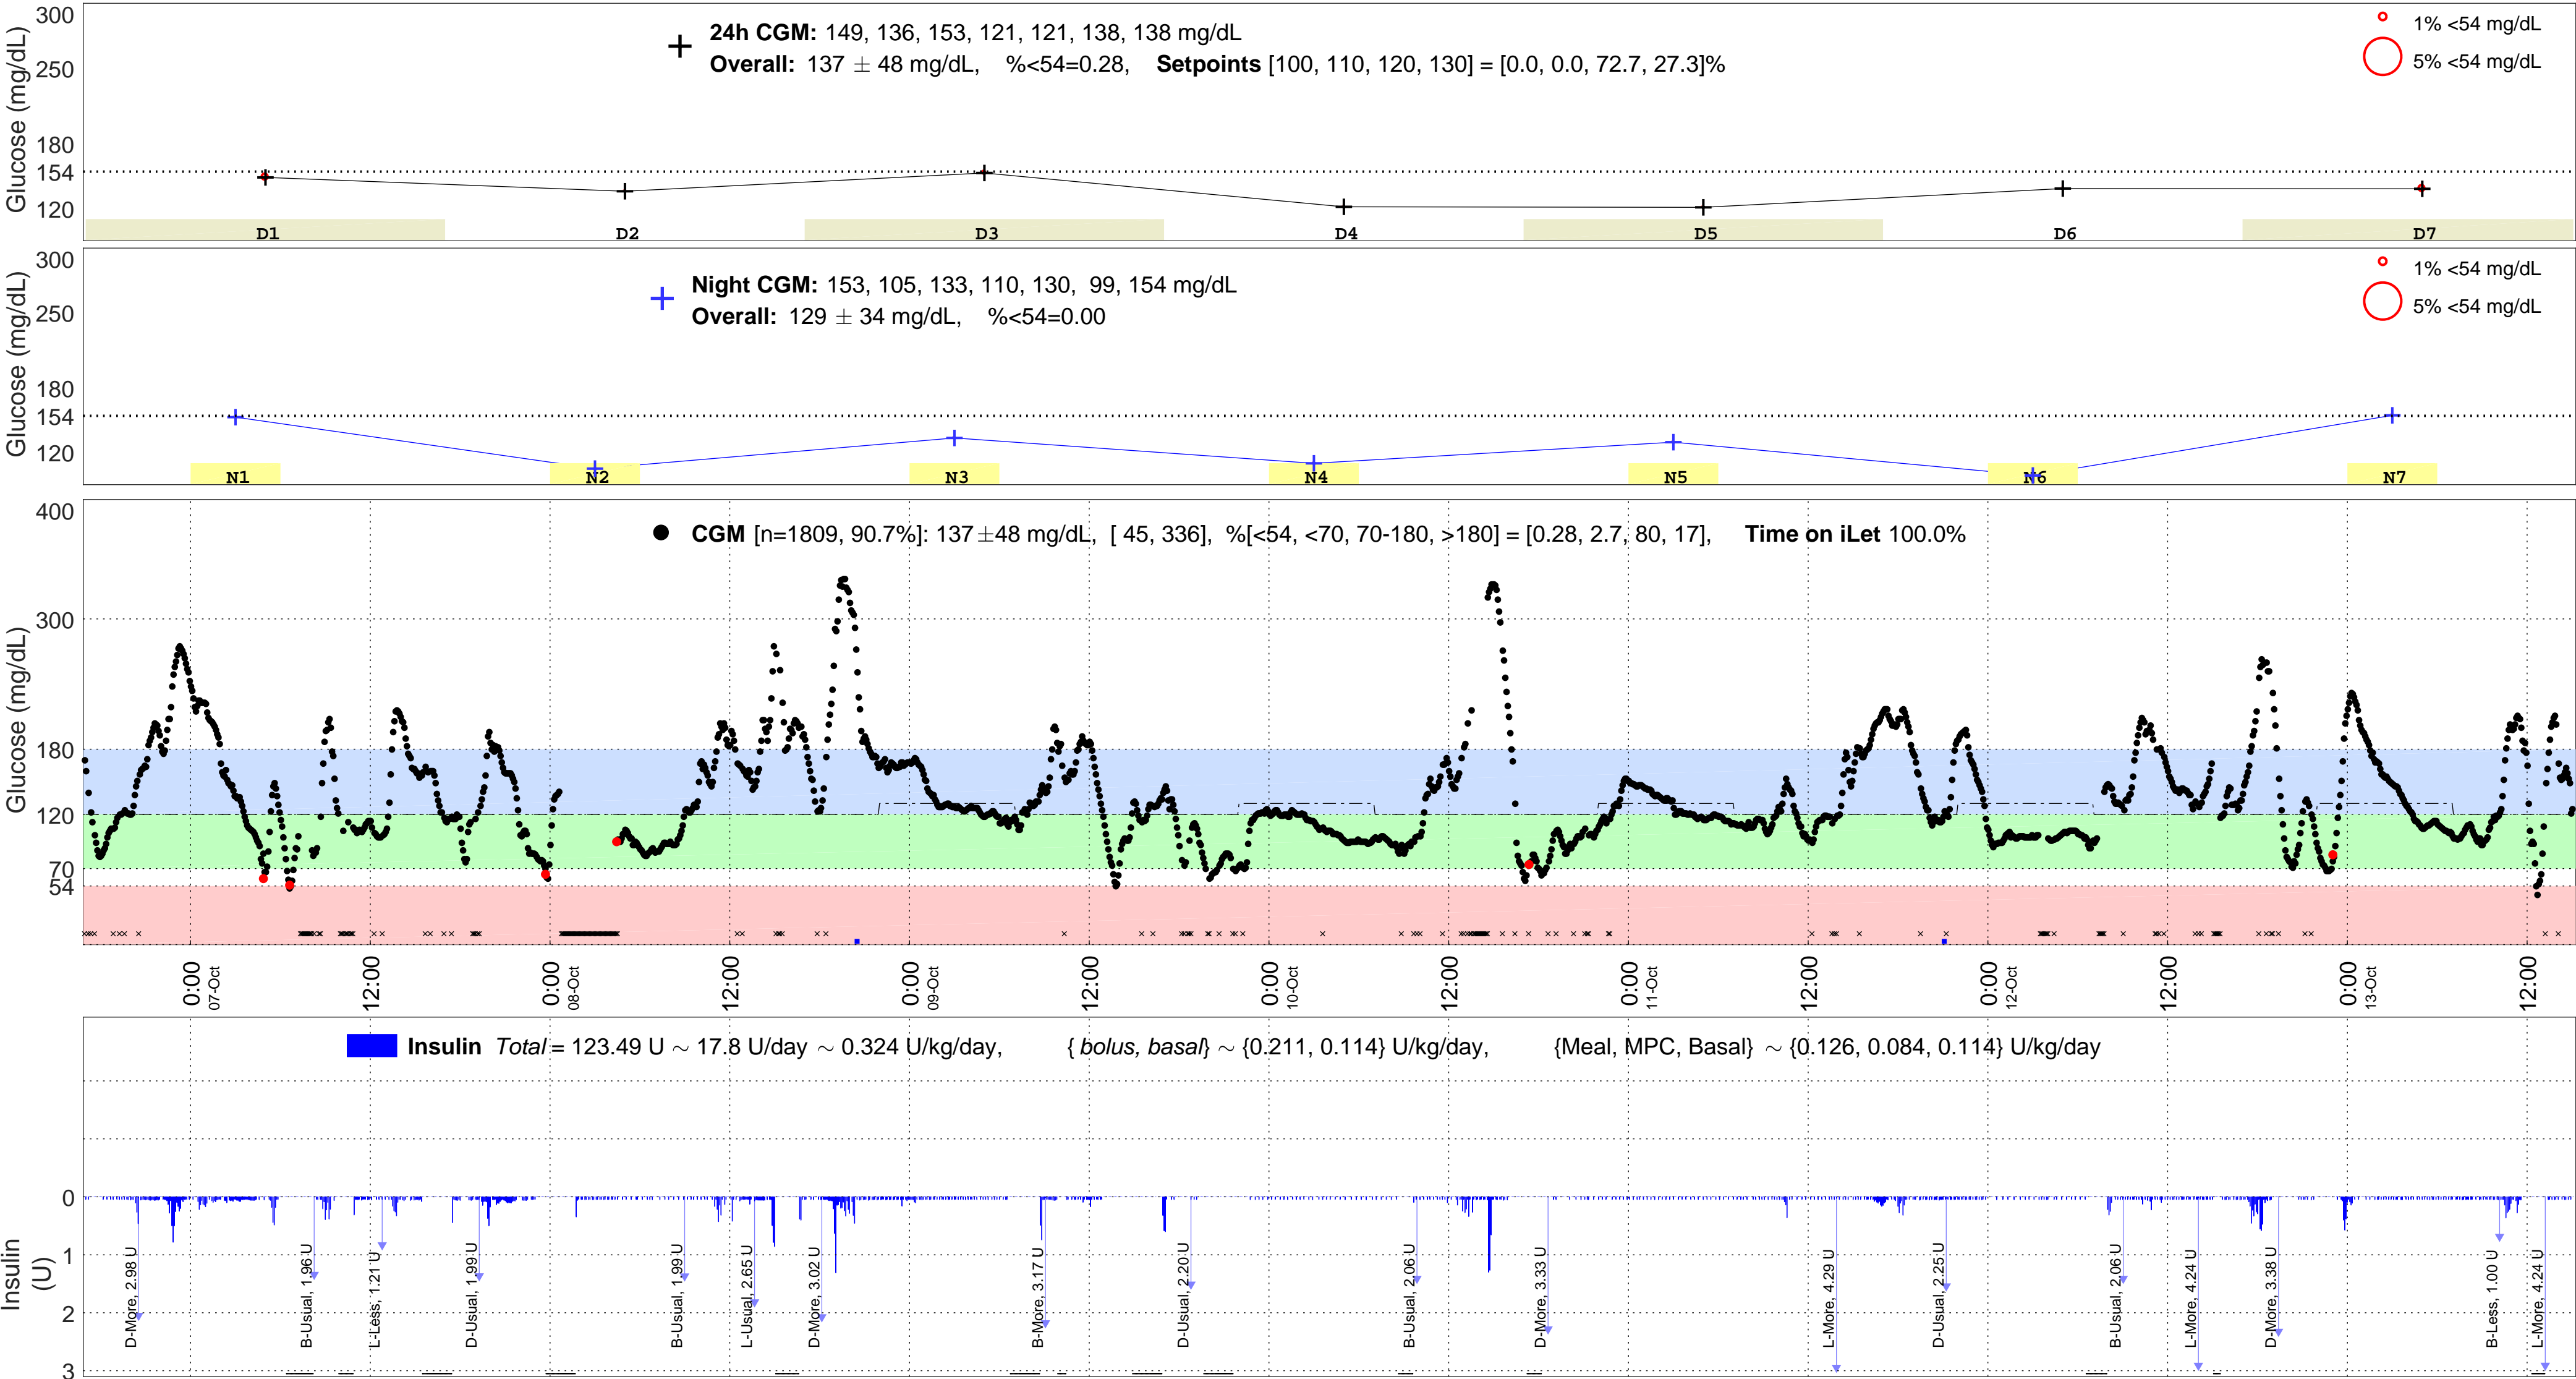

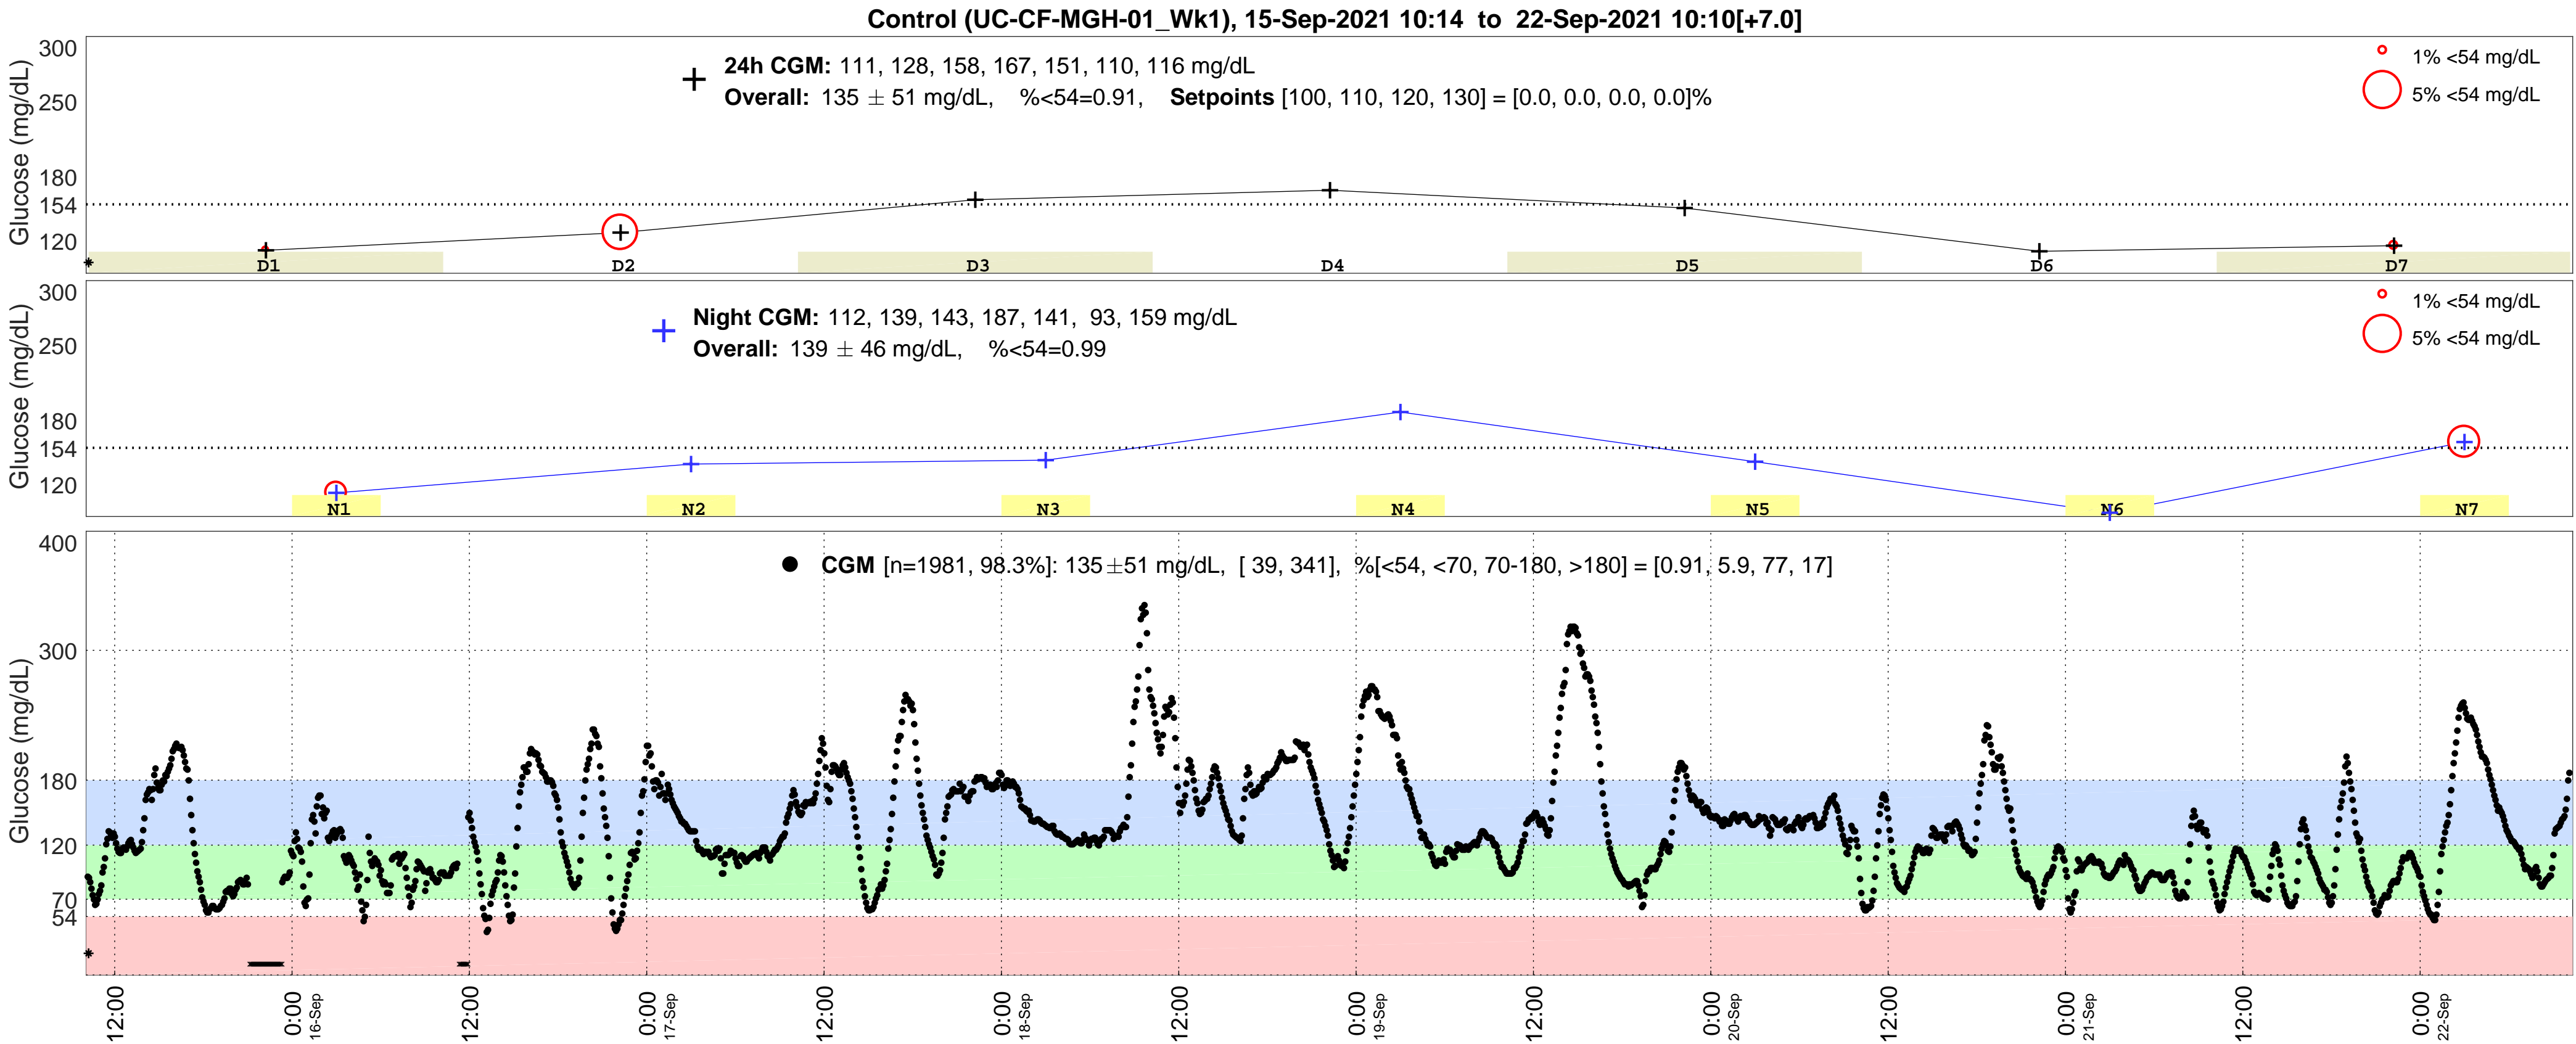

Control (UC-CF-MGH-01\_Wk2), 22-Sep-2021 10:15 to 29-Sep-2021 12:27[+7.1]

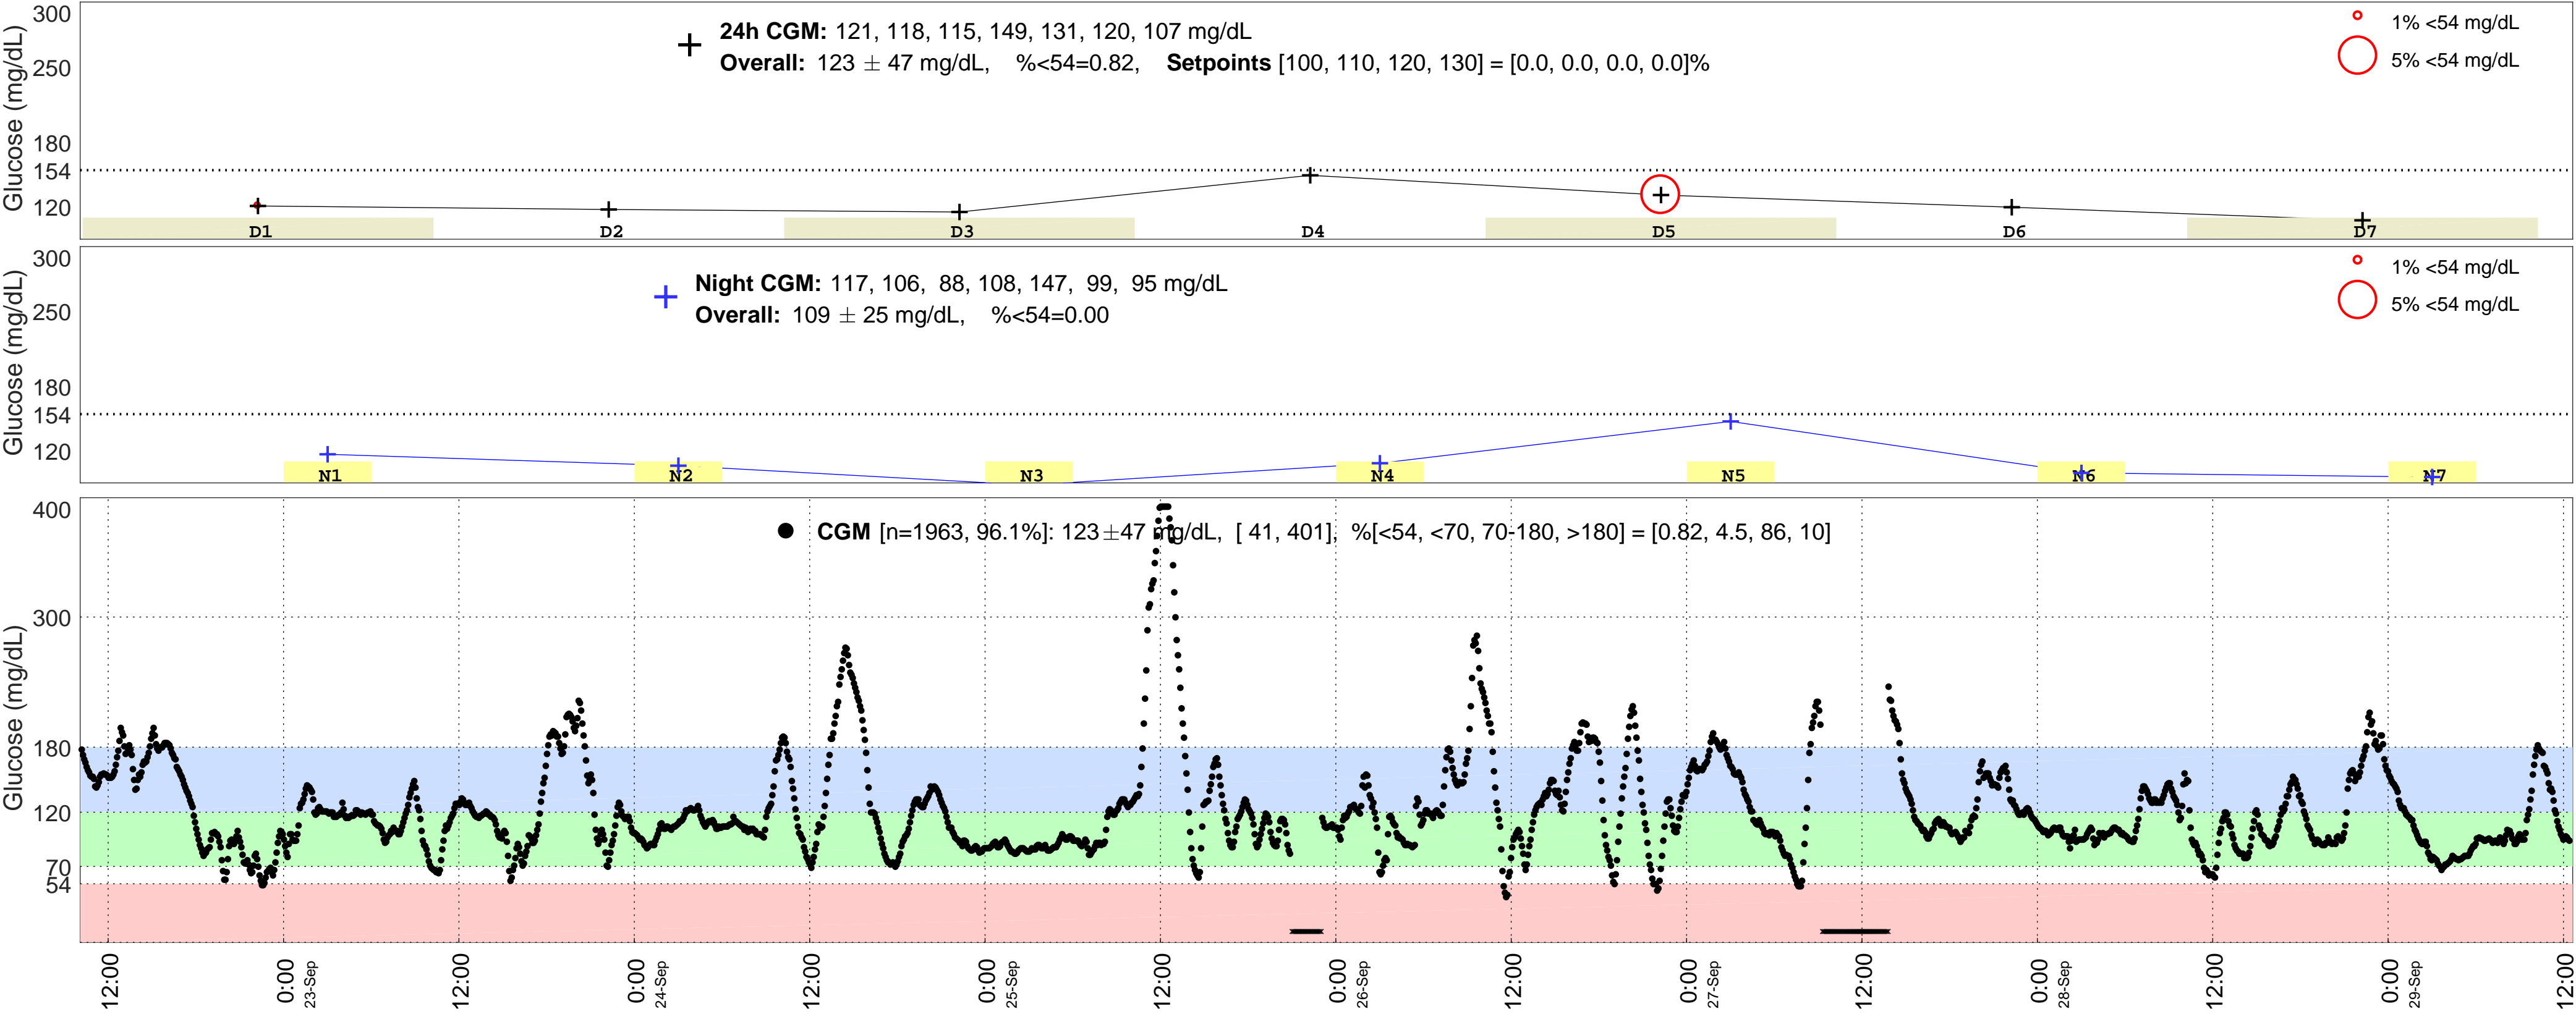





Bionic Pancreas (ID: CF-MGH-02-IP37\_Wk2, BM=56 kg), Insulin Only, 23-Sep-2021 11:43 to 30-Sep-2021 11:33[+7.0]

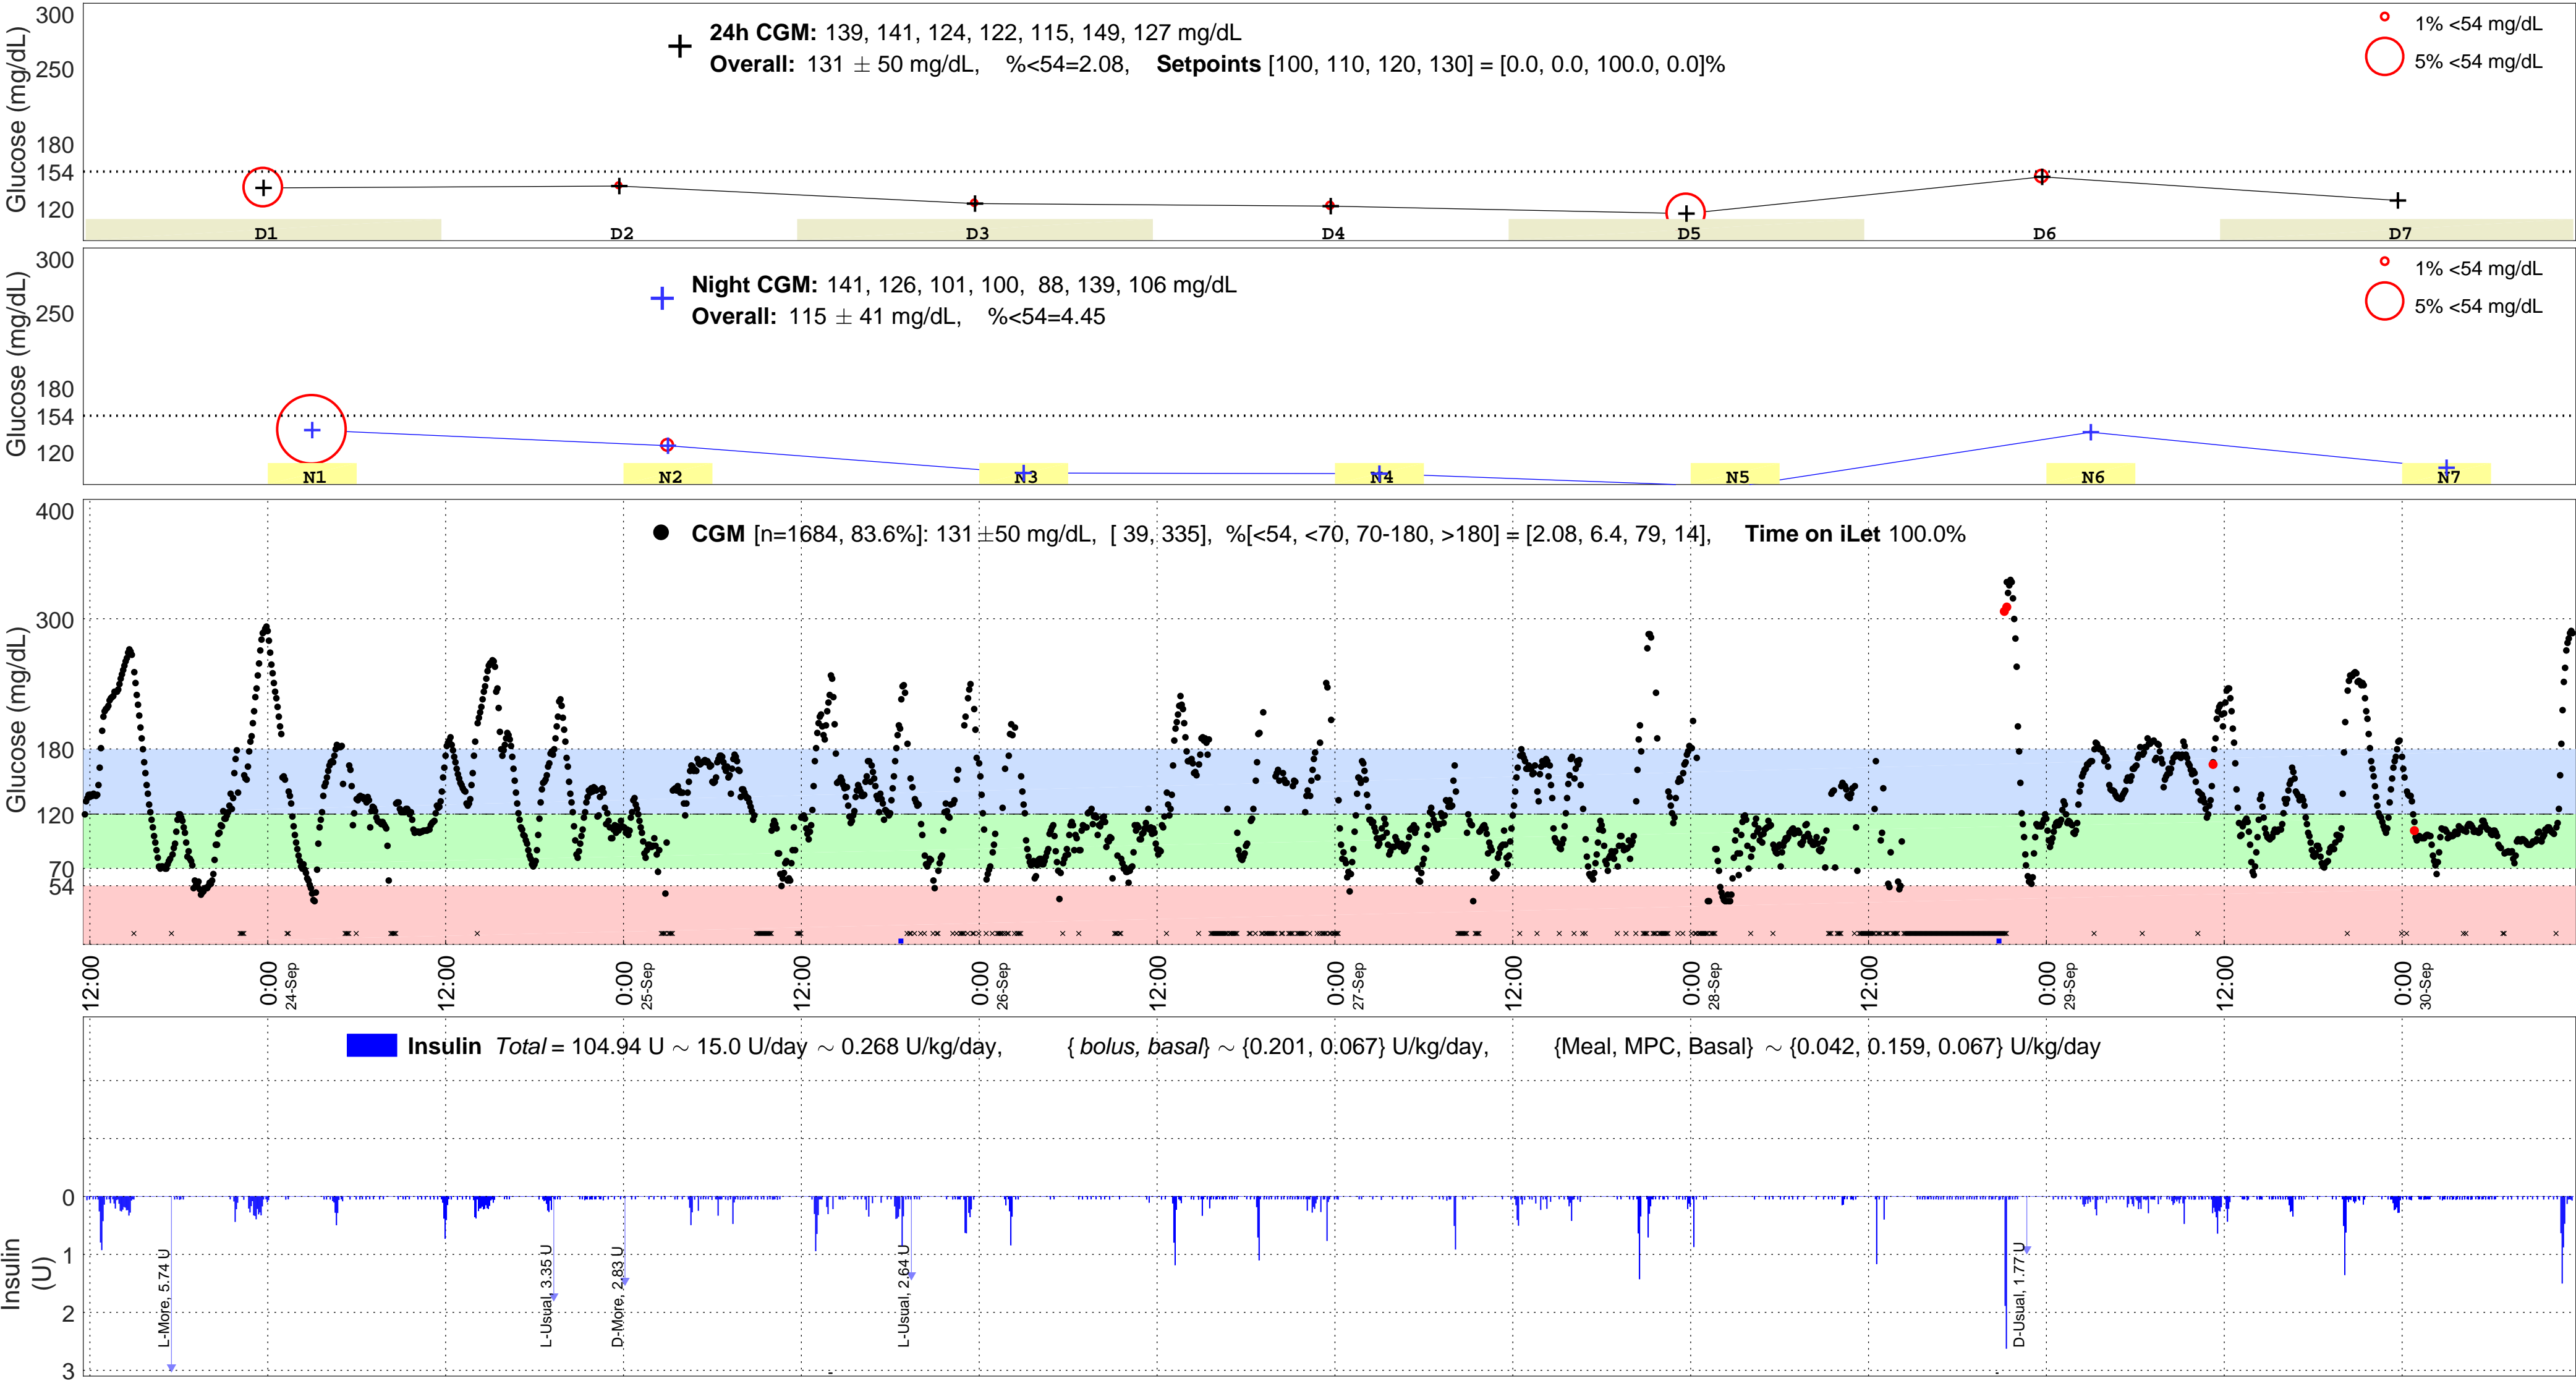

Control (UC-CF-MGH-02\_Wk1), 30-Sep-2021 11:26 to 07-Oct-2021 11:21[+7.0]

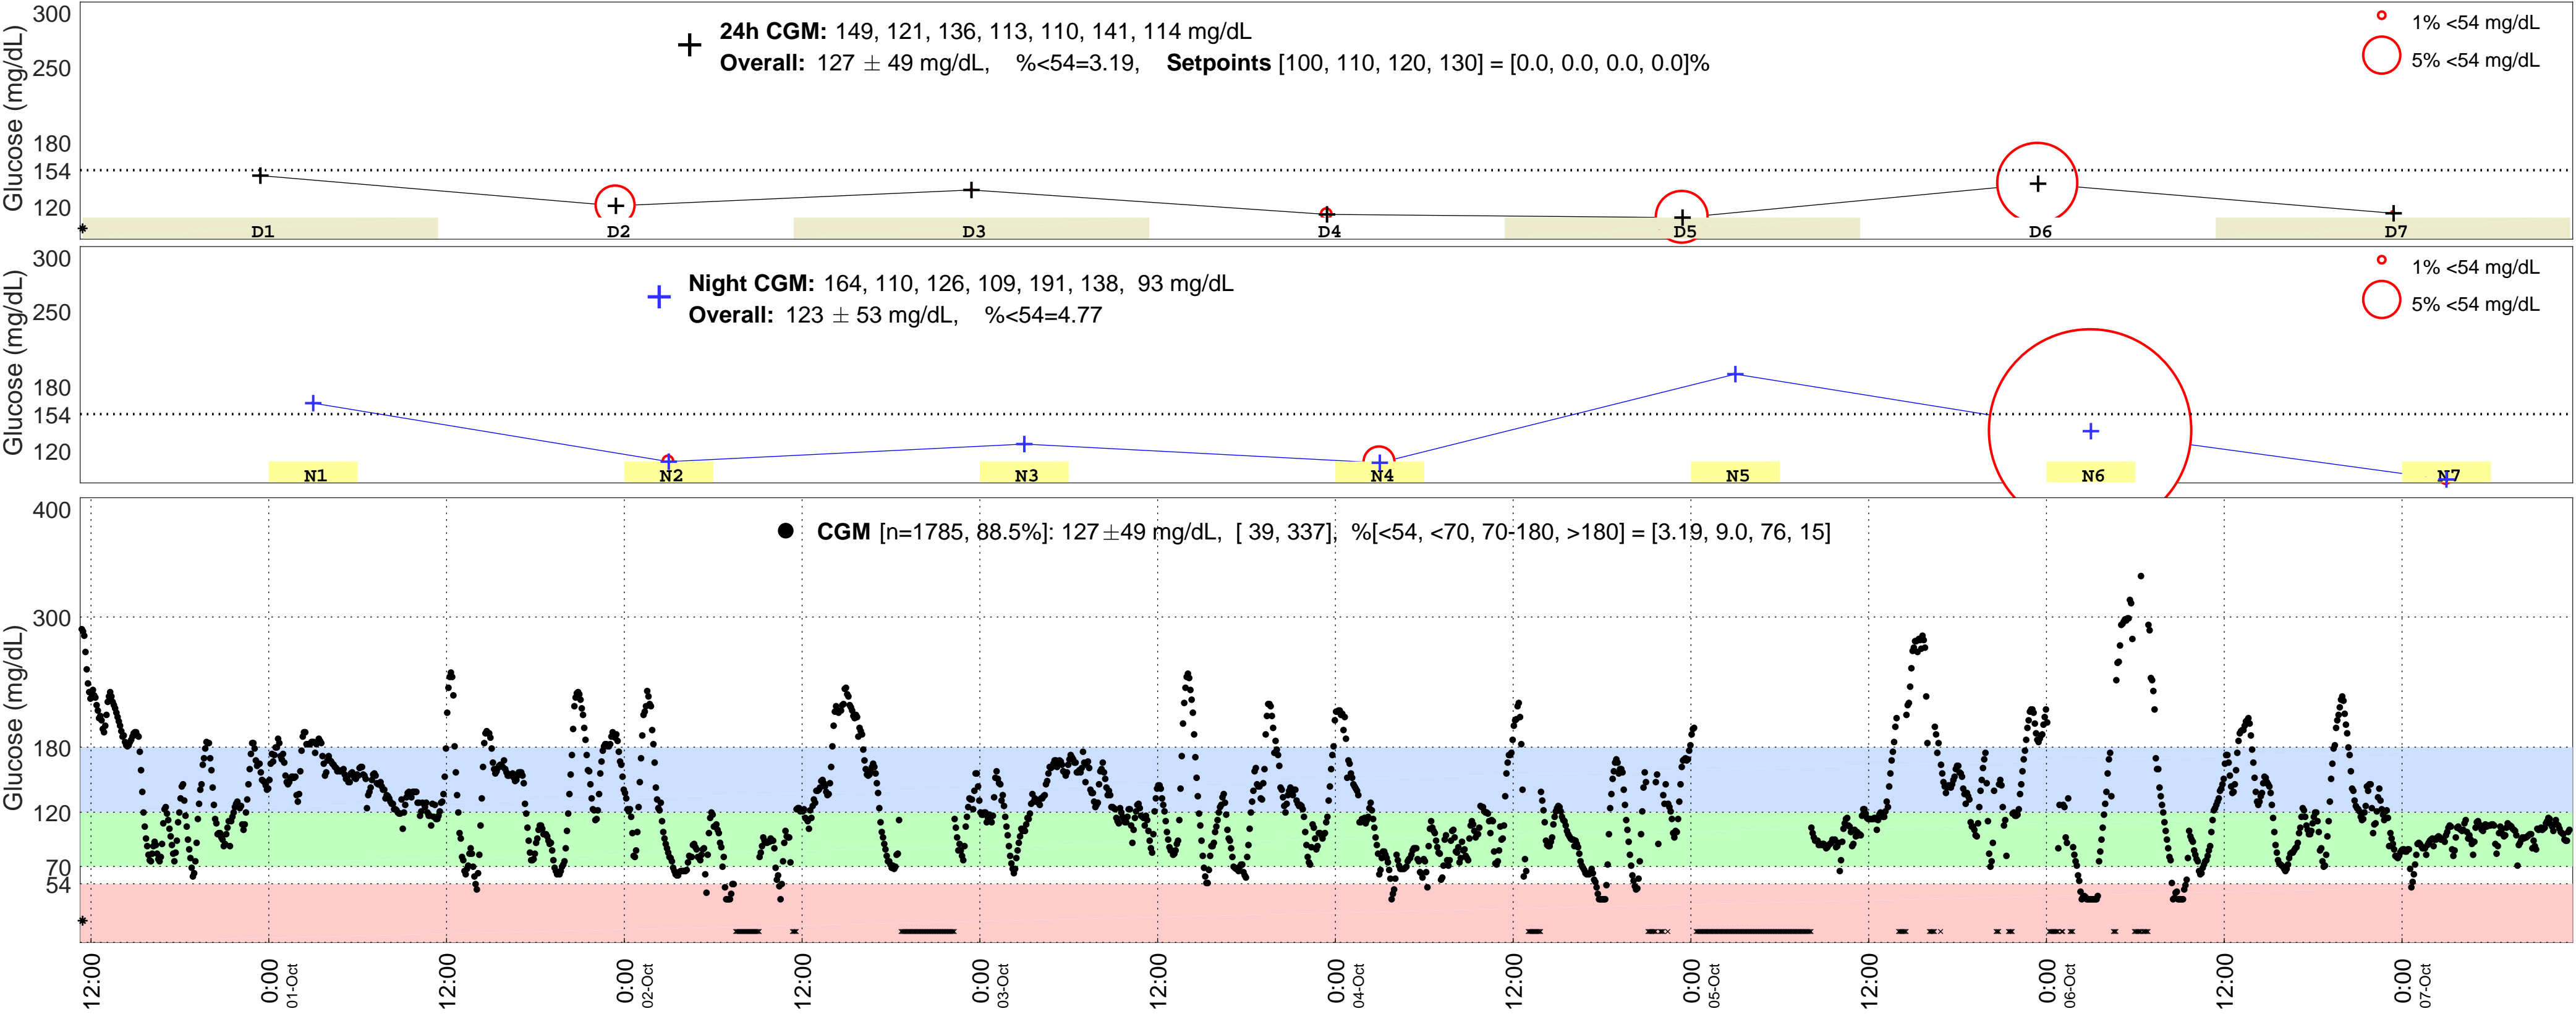

Control (UC-CF-MGH-02\_Wk2), 07-Oct-2021 11:26 to 14-Oct-2021 10:46[+7.0]

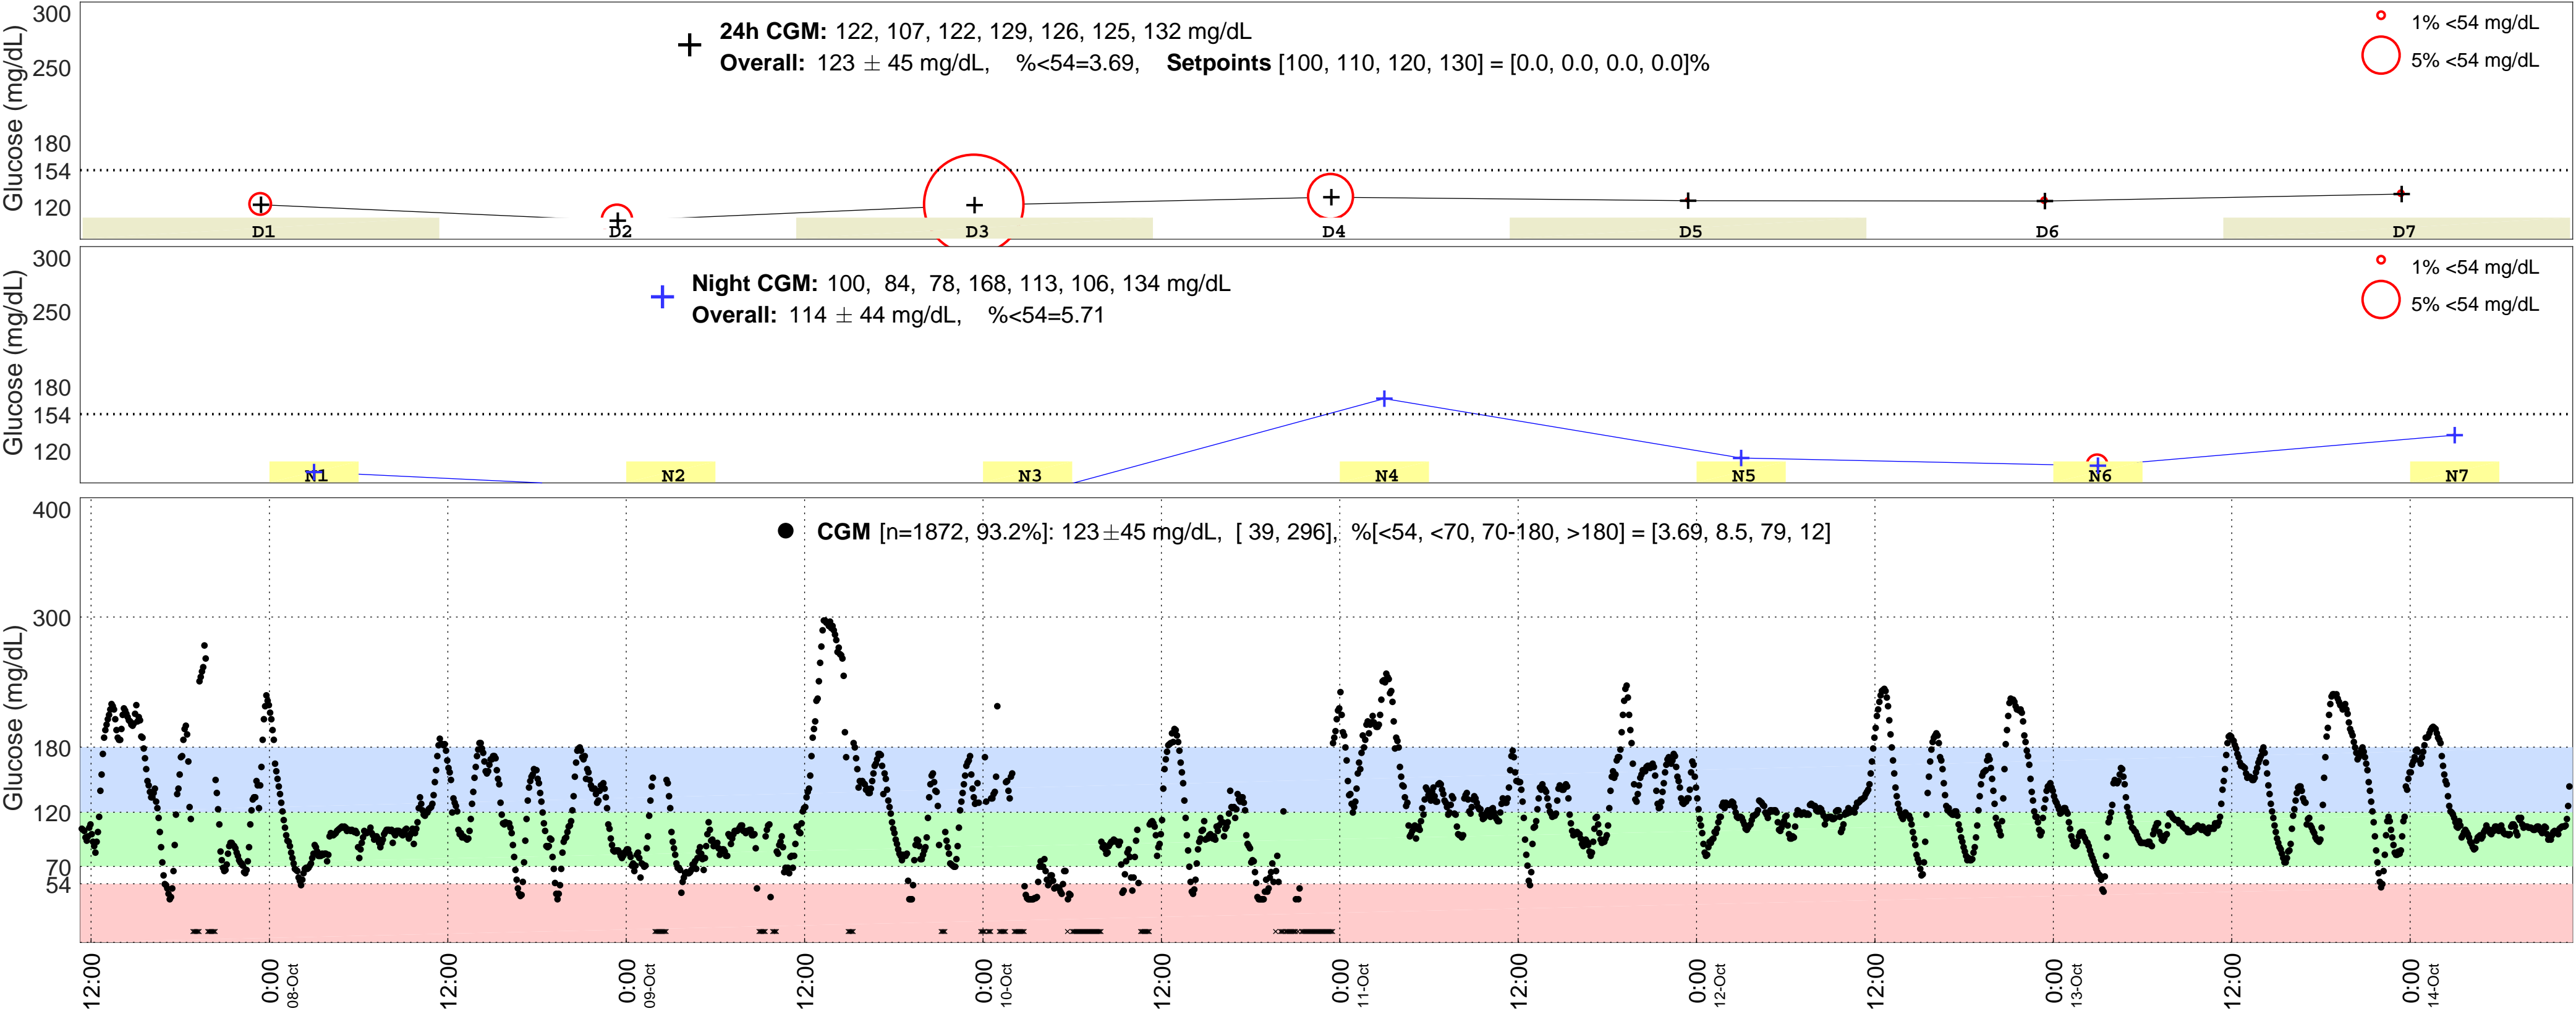



Bionic Pancreas (ID: CF-MGH-03-IP36\_Wk1, BM=59 kg), Insulin Only, 08-Sep-2021 14:37 to 15-Sep-2021 14:32[+7.0]

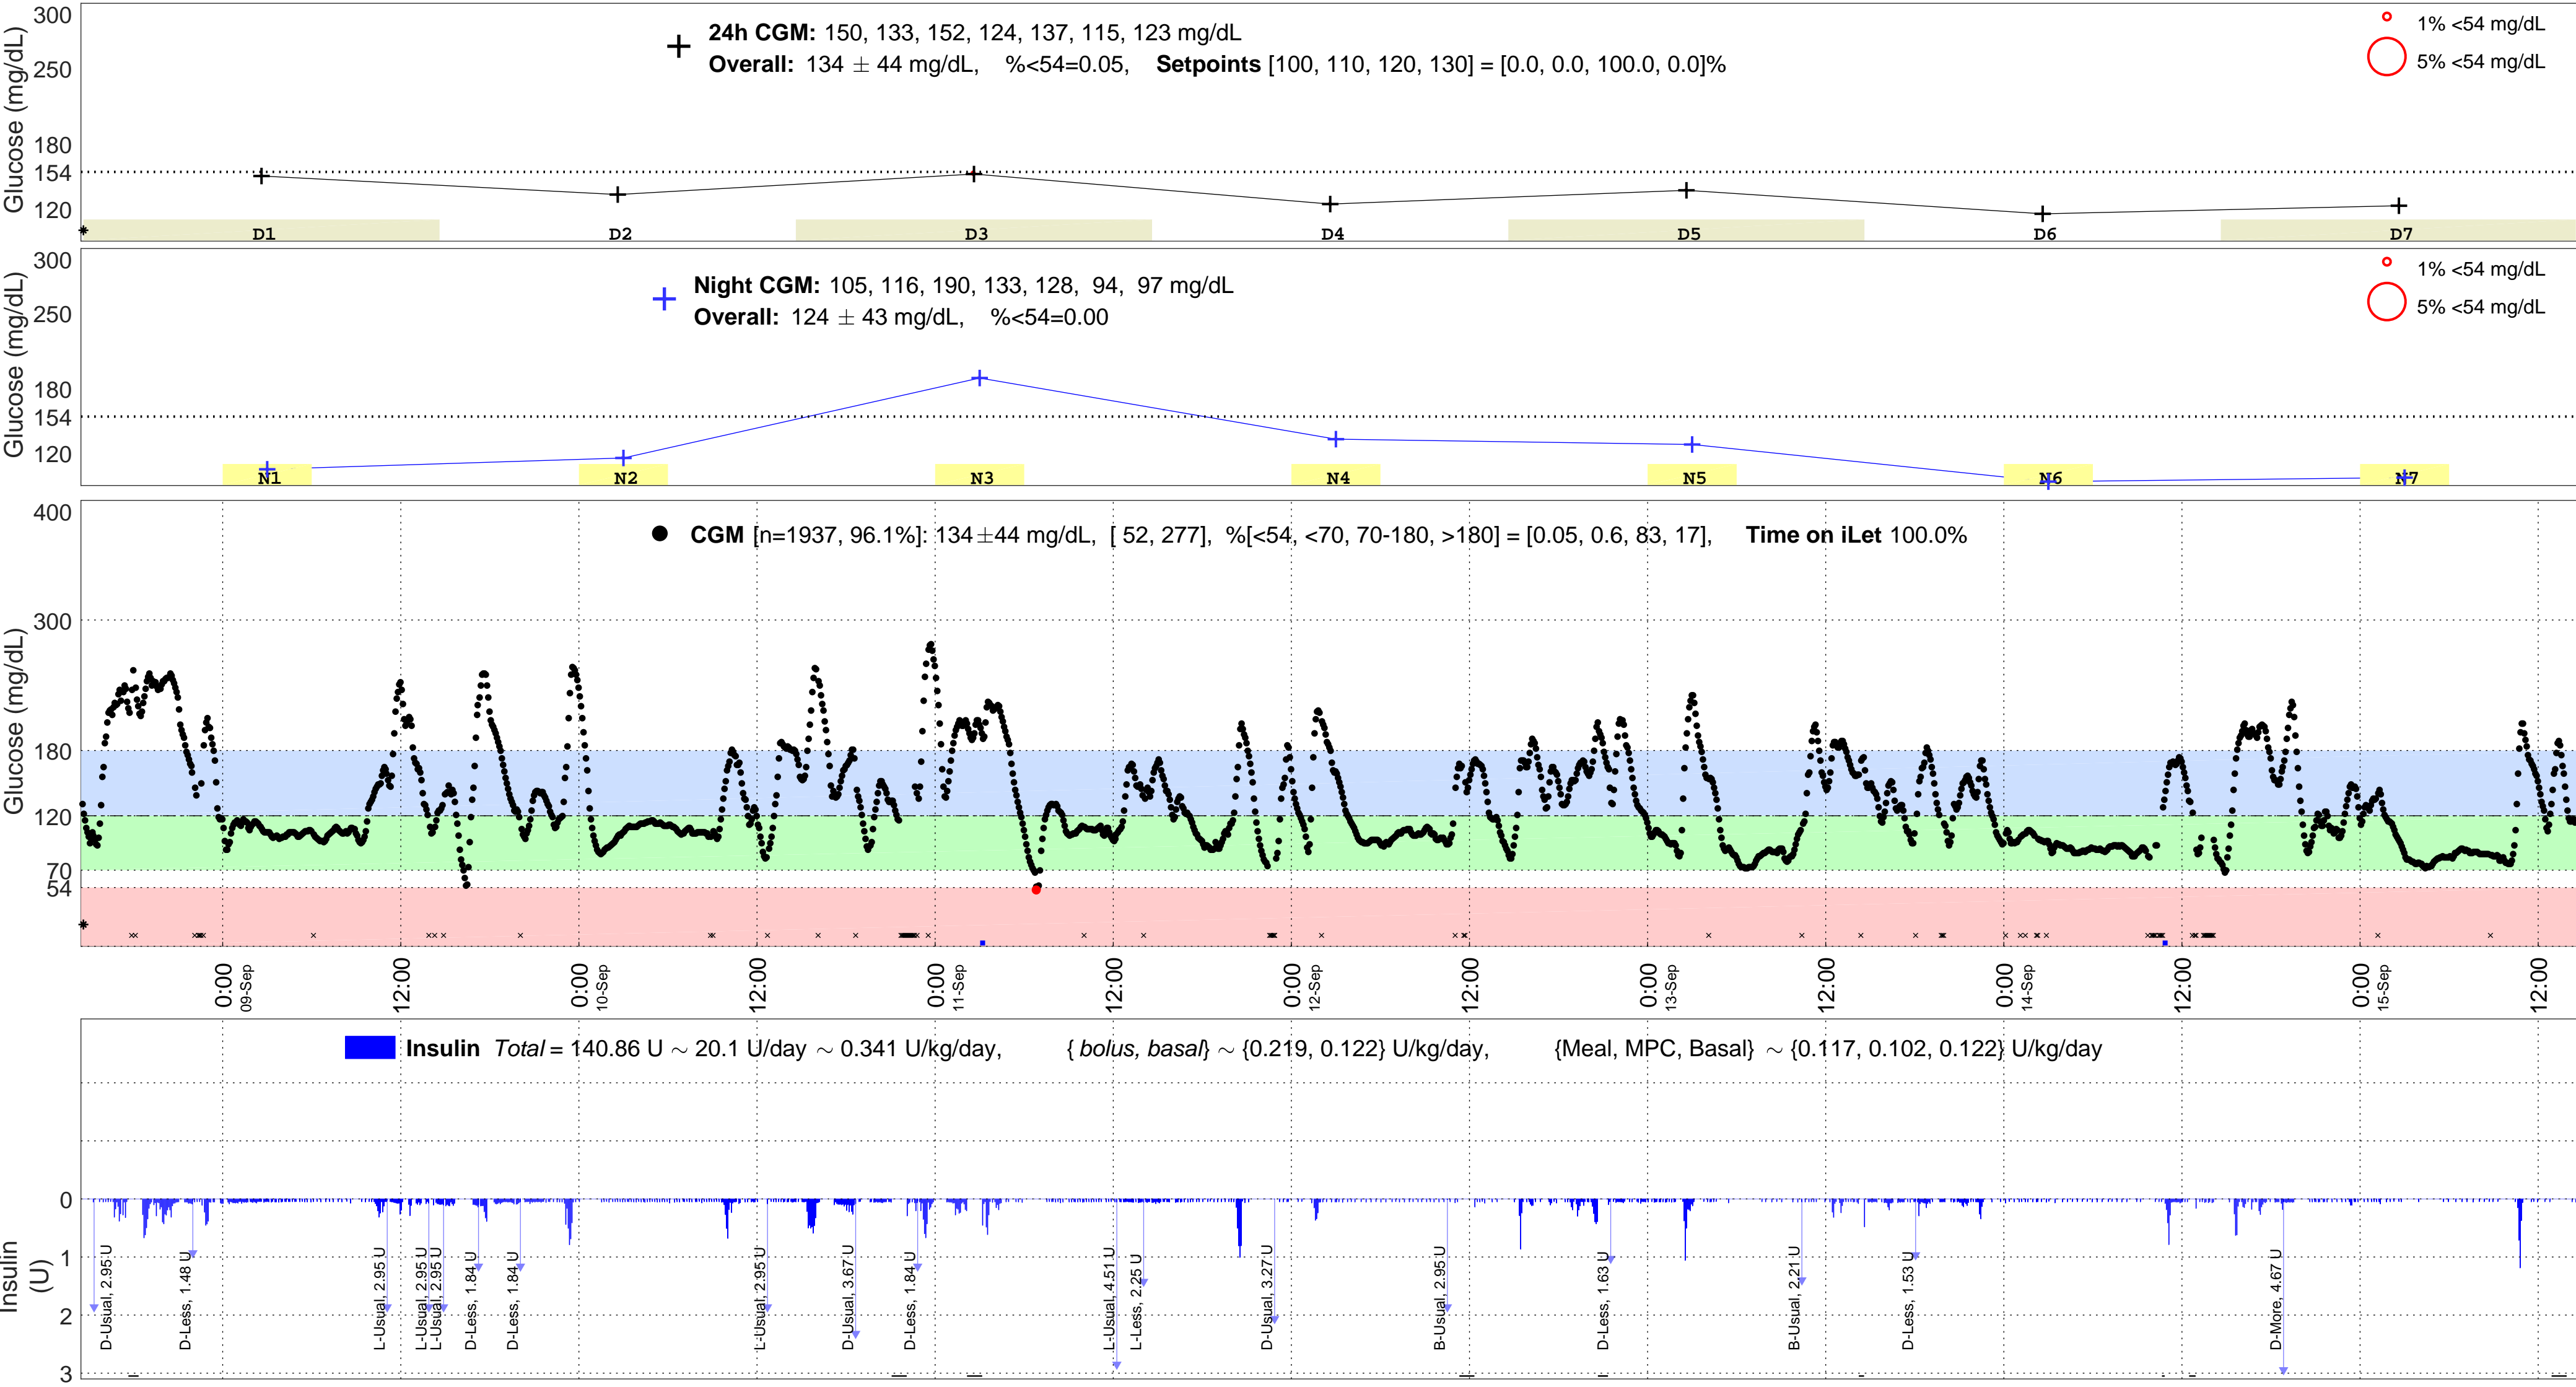

Bionic Pancreas (ID: CF-MGH-03-IP36\_Wk2, BM=59 kg), Insulin Only, 15-Sep-2021 14:37 to 22-Sep-2021 13:02[+6.9]

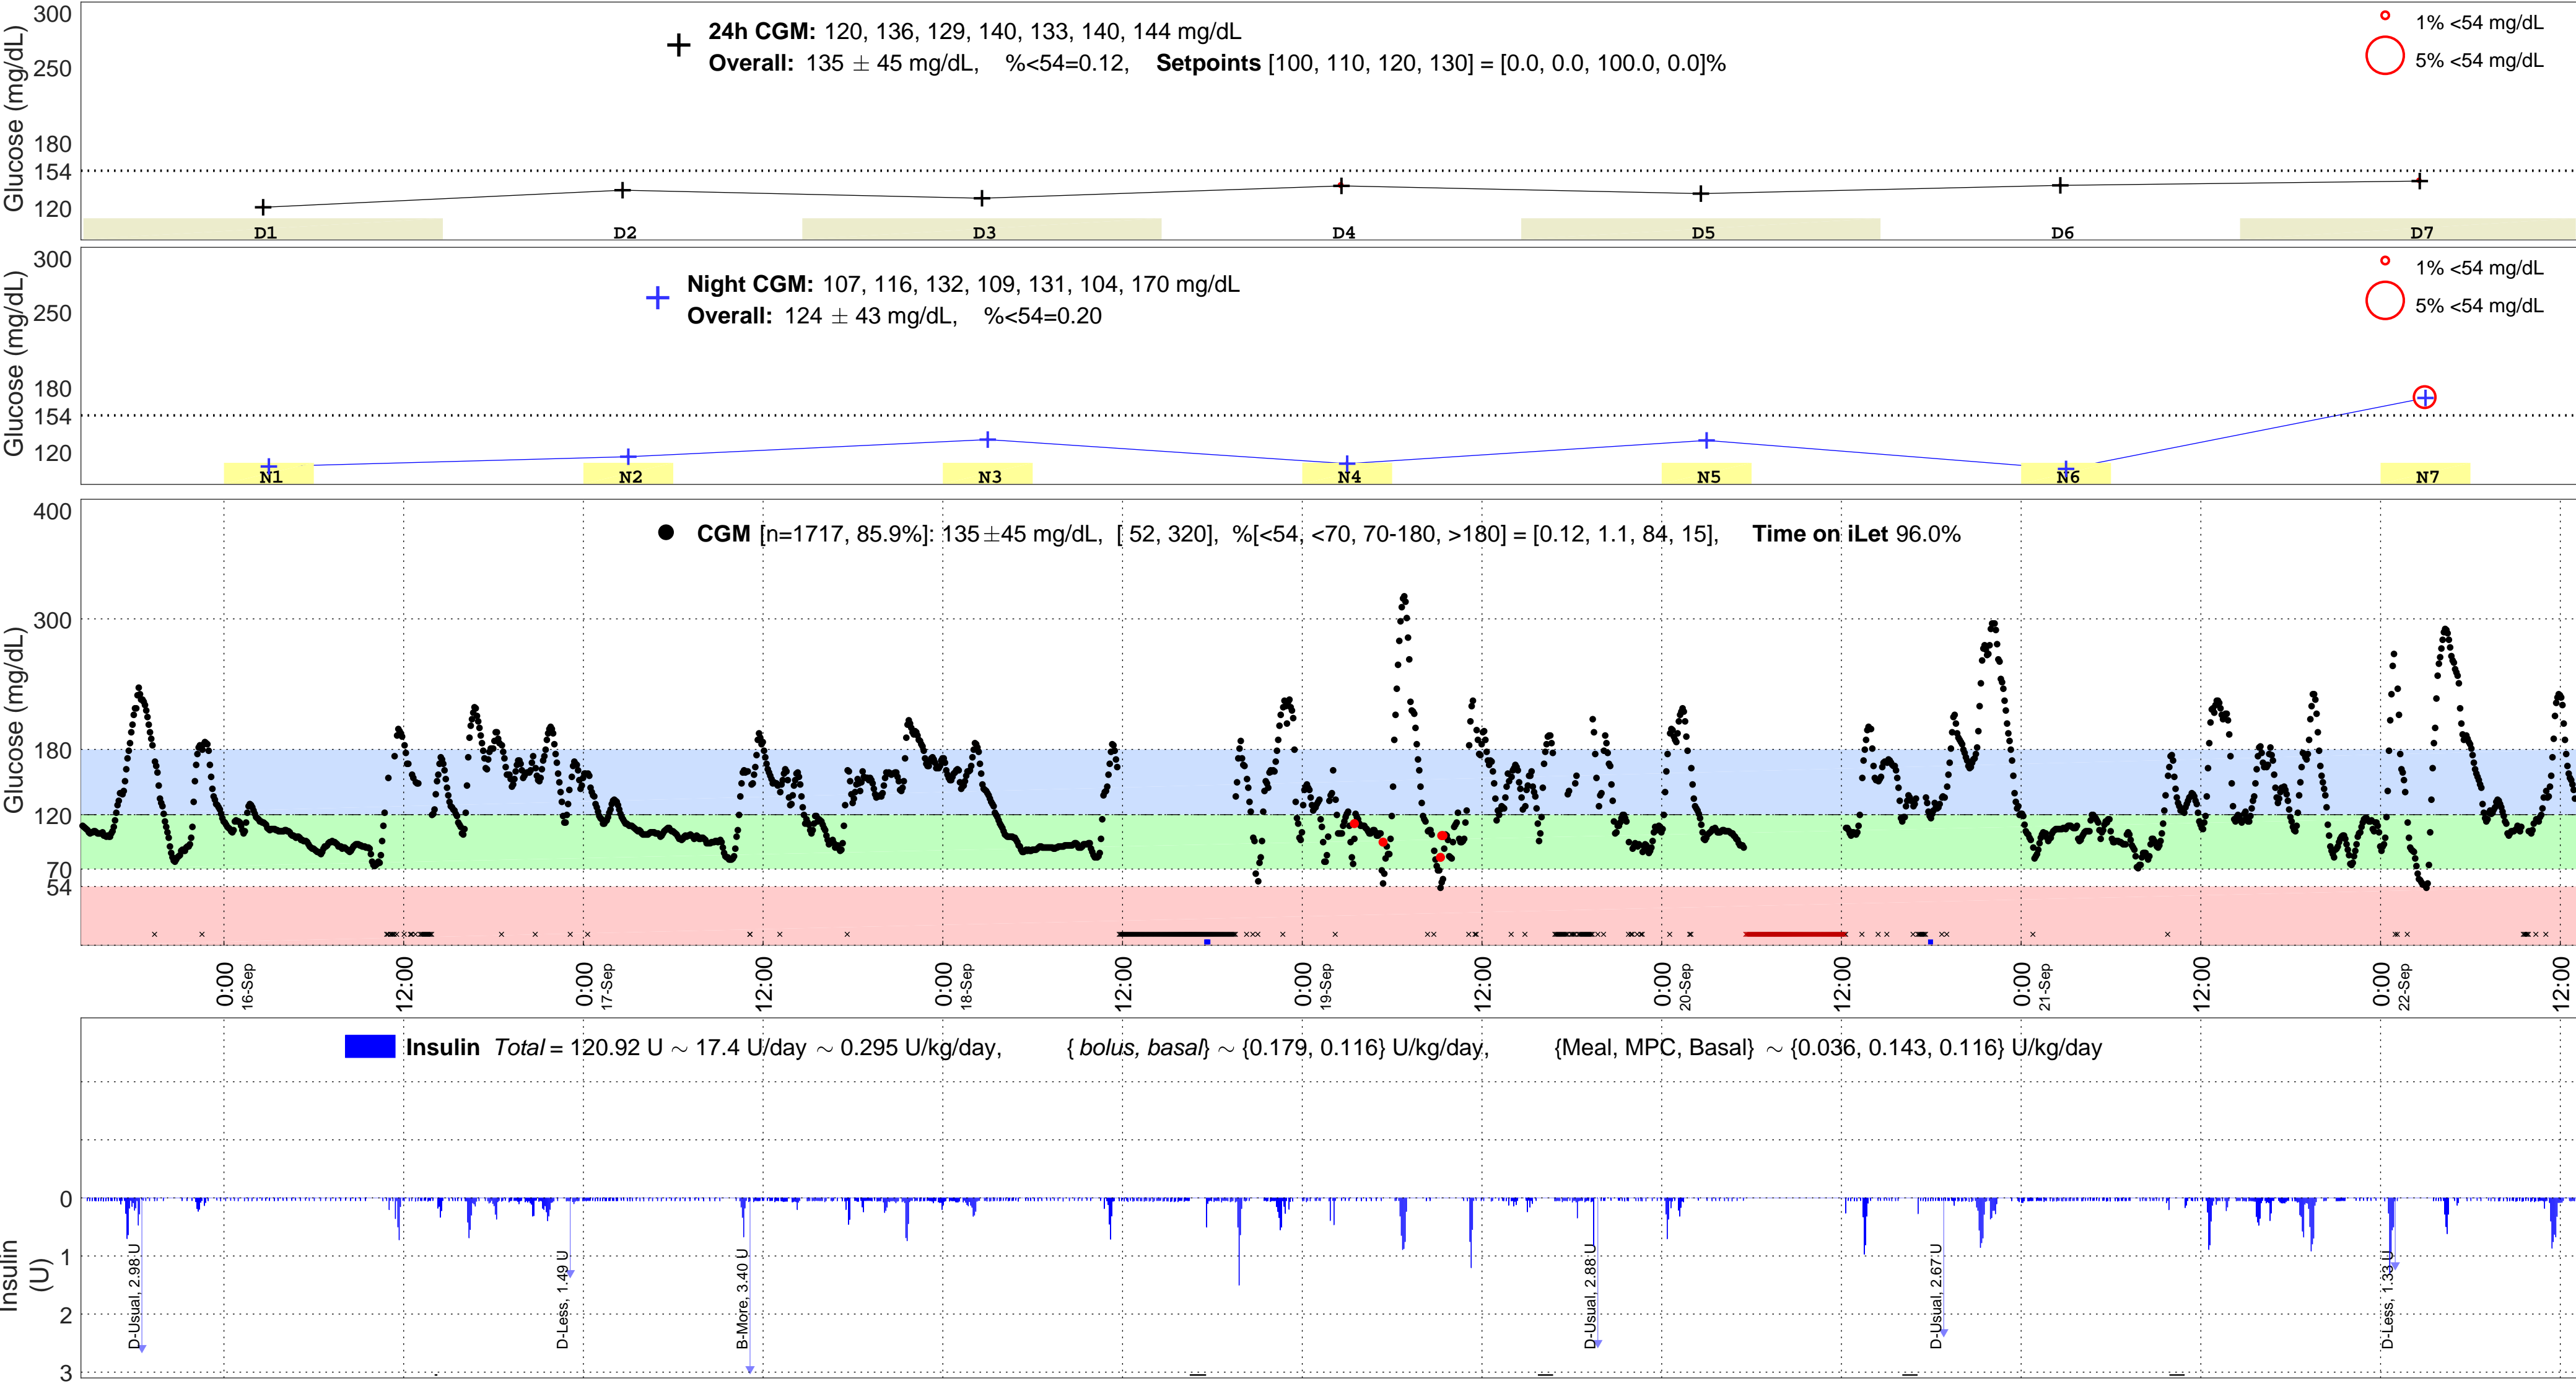

Control (UC-CF-MGH-03\_Wk1), 22-Sep-2021 13:04 to 29-Sep-2021 12:59[+7.0]

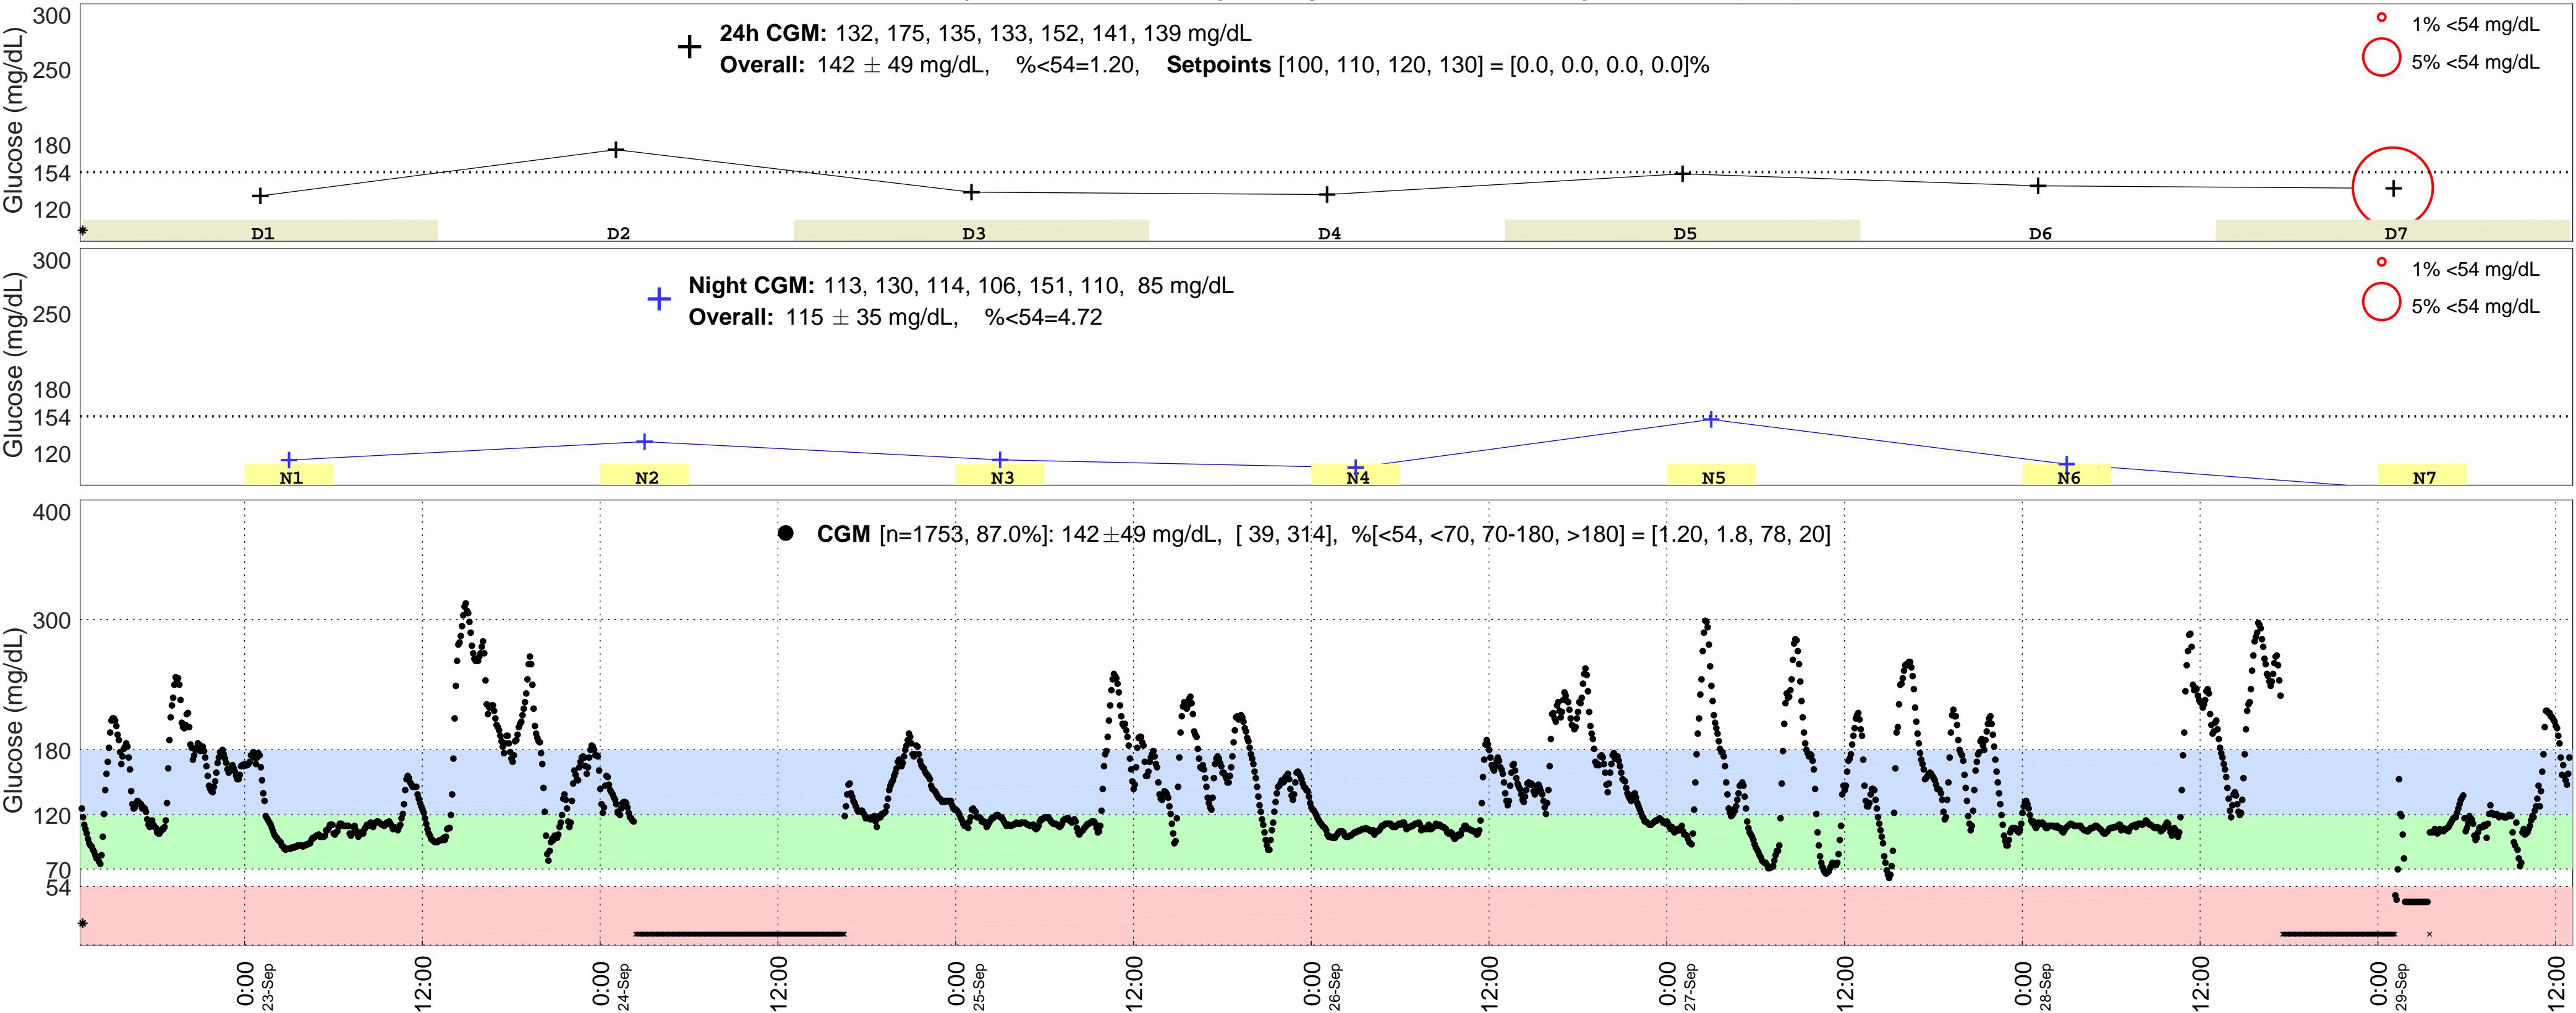

Control (UC-CF-MGH-03\_Wk2), 29-Sep-2021 13:04 to 06-Oct-2021 11:44[+6.9]

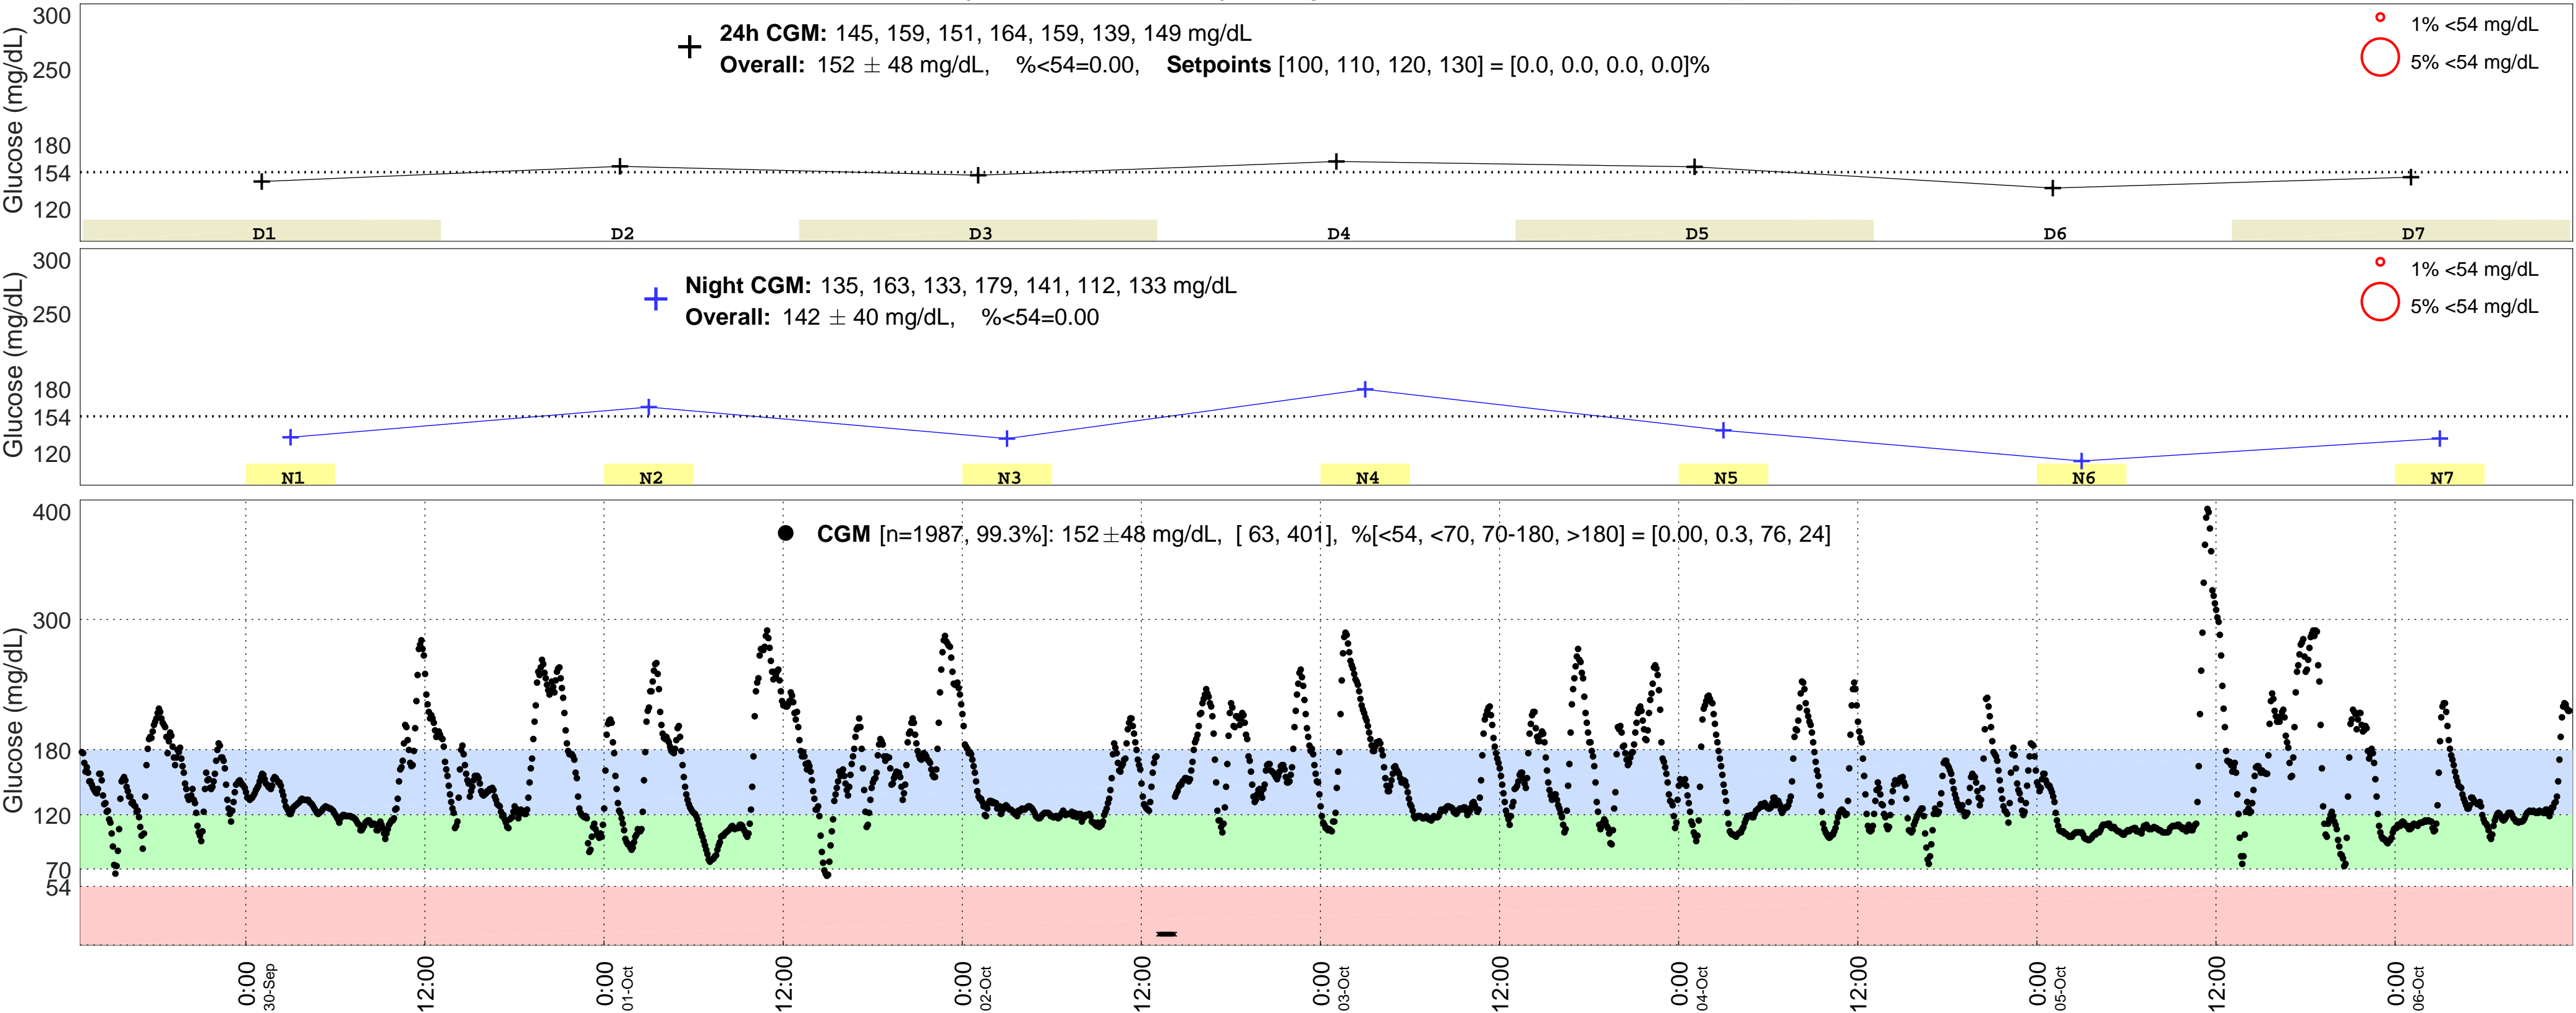

Bionic Pancreas (ID: CF-MGH-04-IM30\_Wk1, BM=70 kg), Insulin Only, 08-Oct-2021 13:45 to 15-Oct-2021 13:40[+7.0]

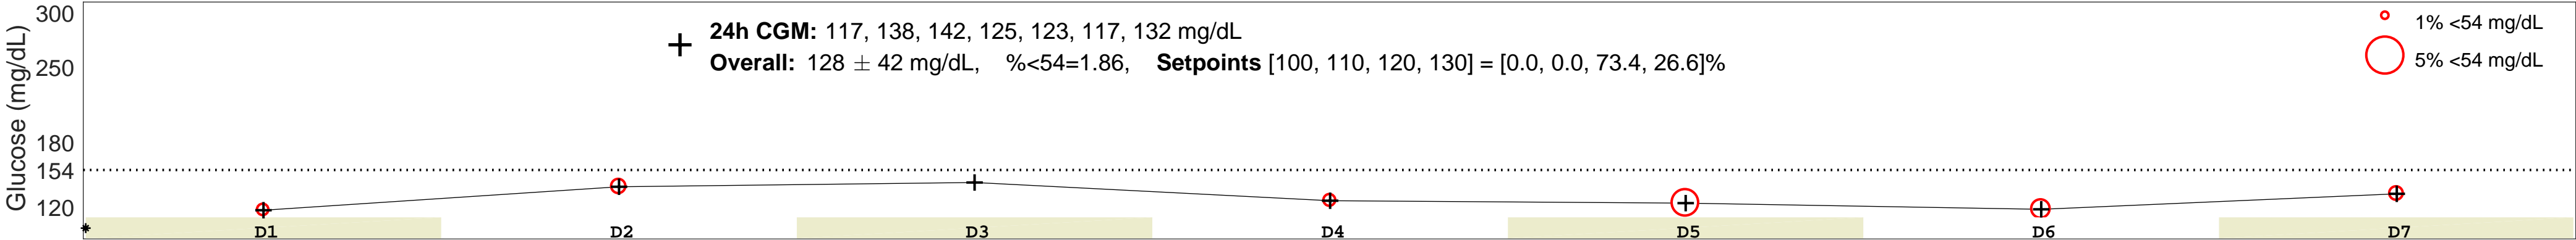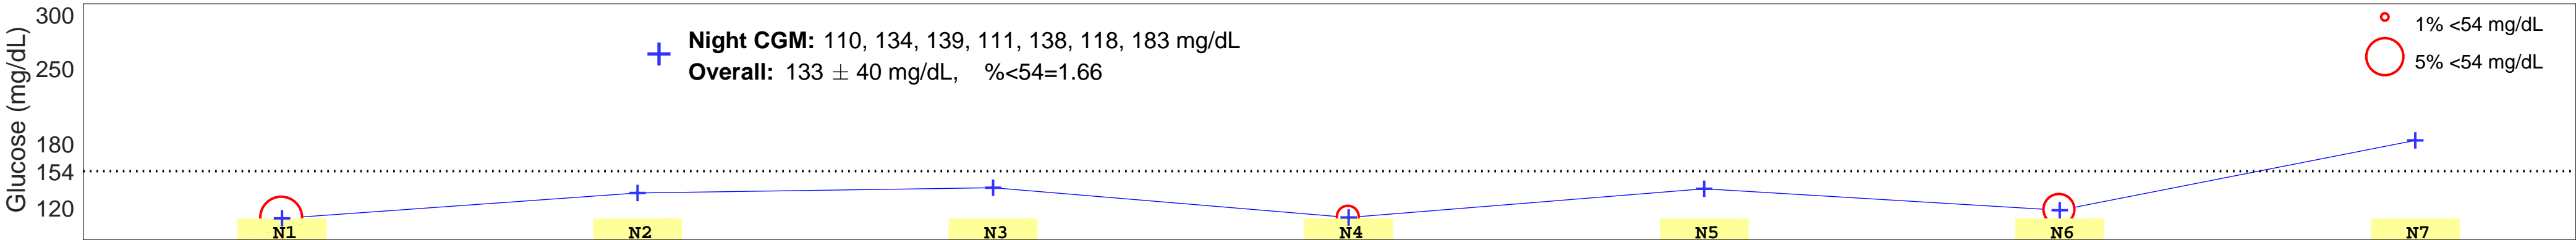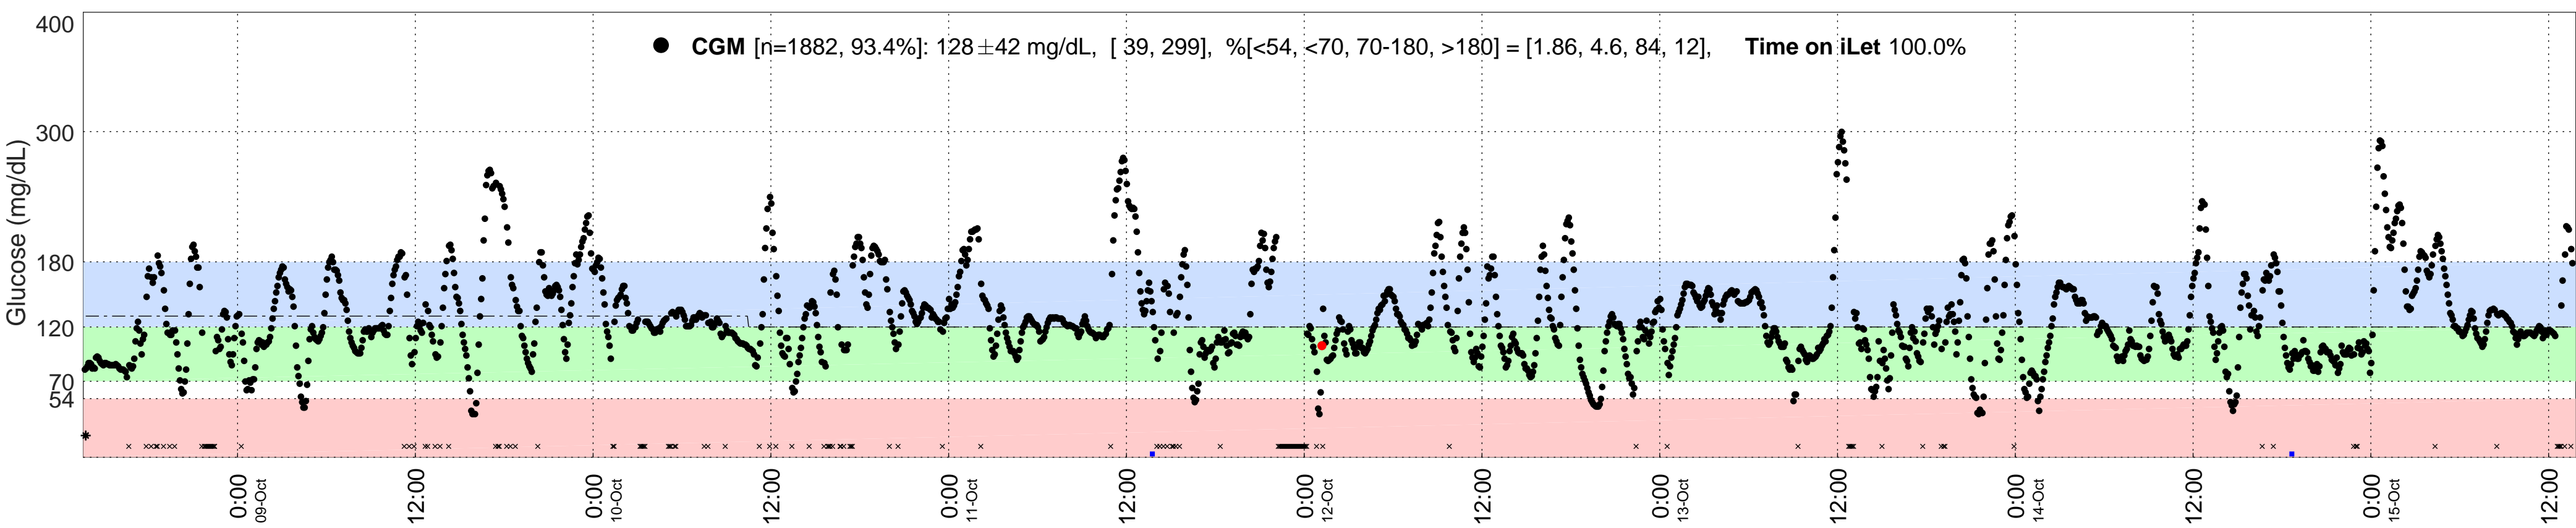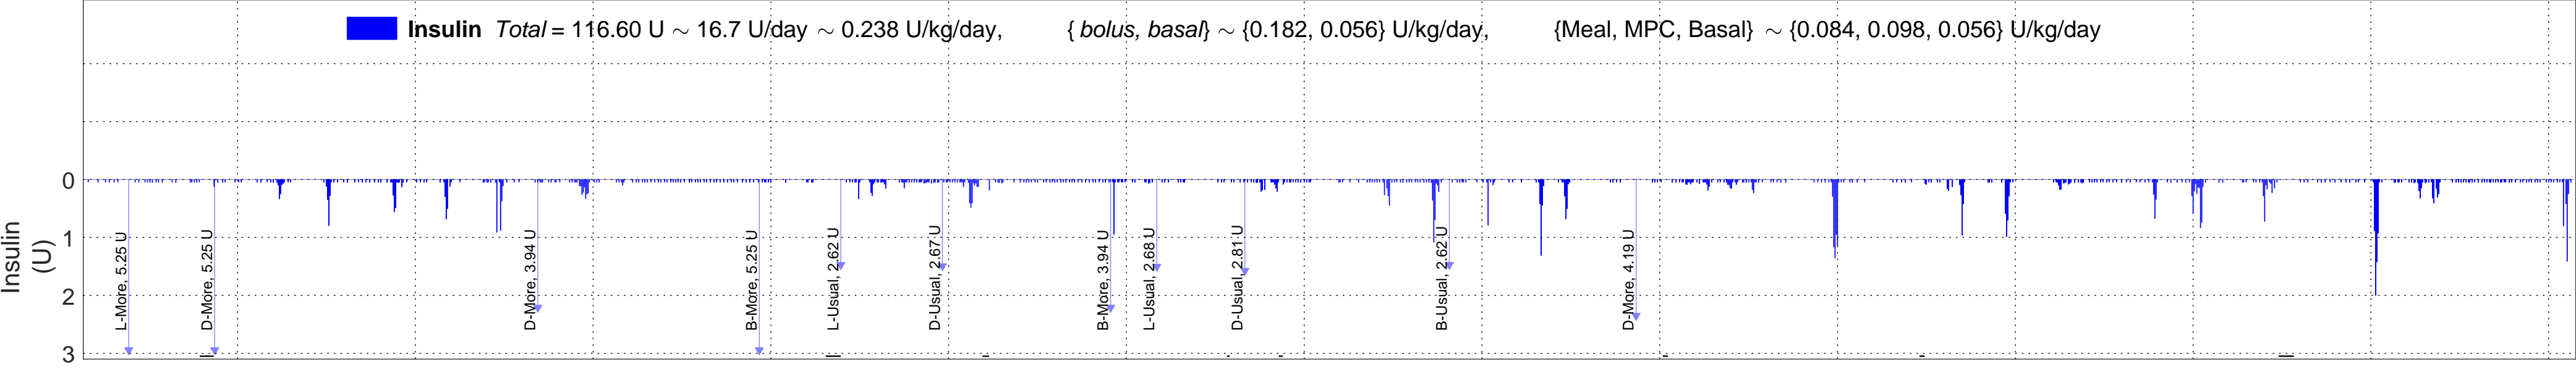



Bionic Pancreas (ID: CF-MGH-04-IM30\_Wk2, BM=70 kg), Insulin Only, 15-Oct-2021 13:45 to 22-Oct-2021 14:15[+7.0]

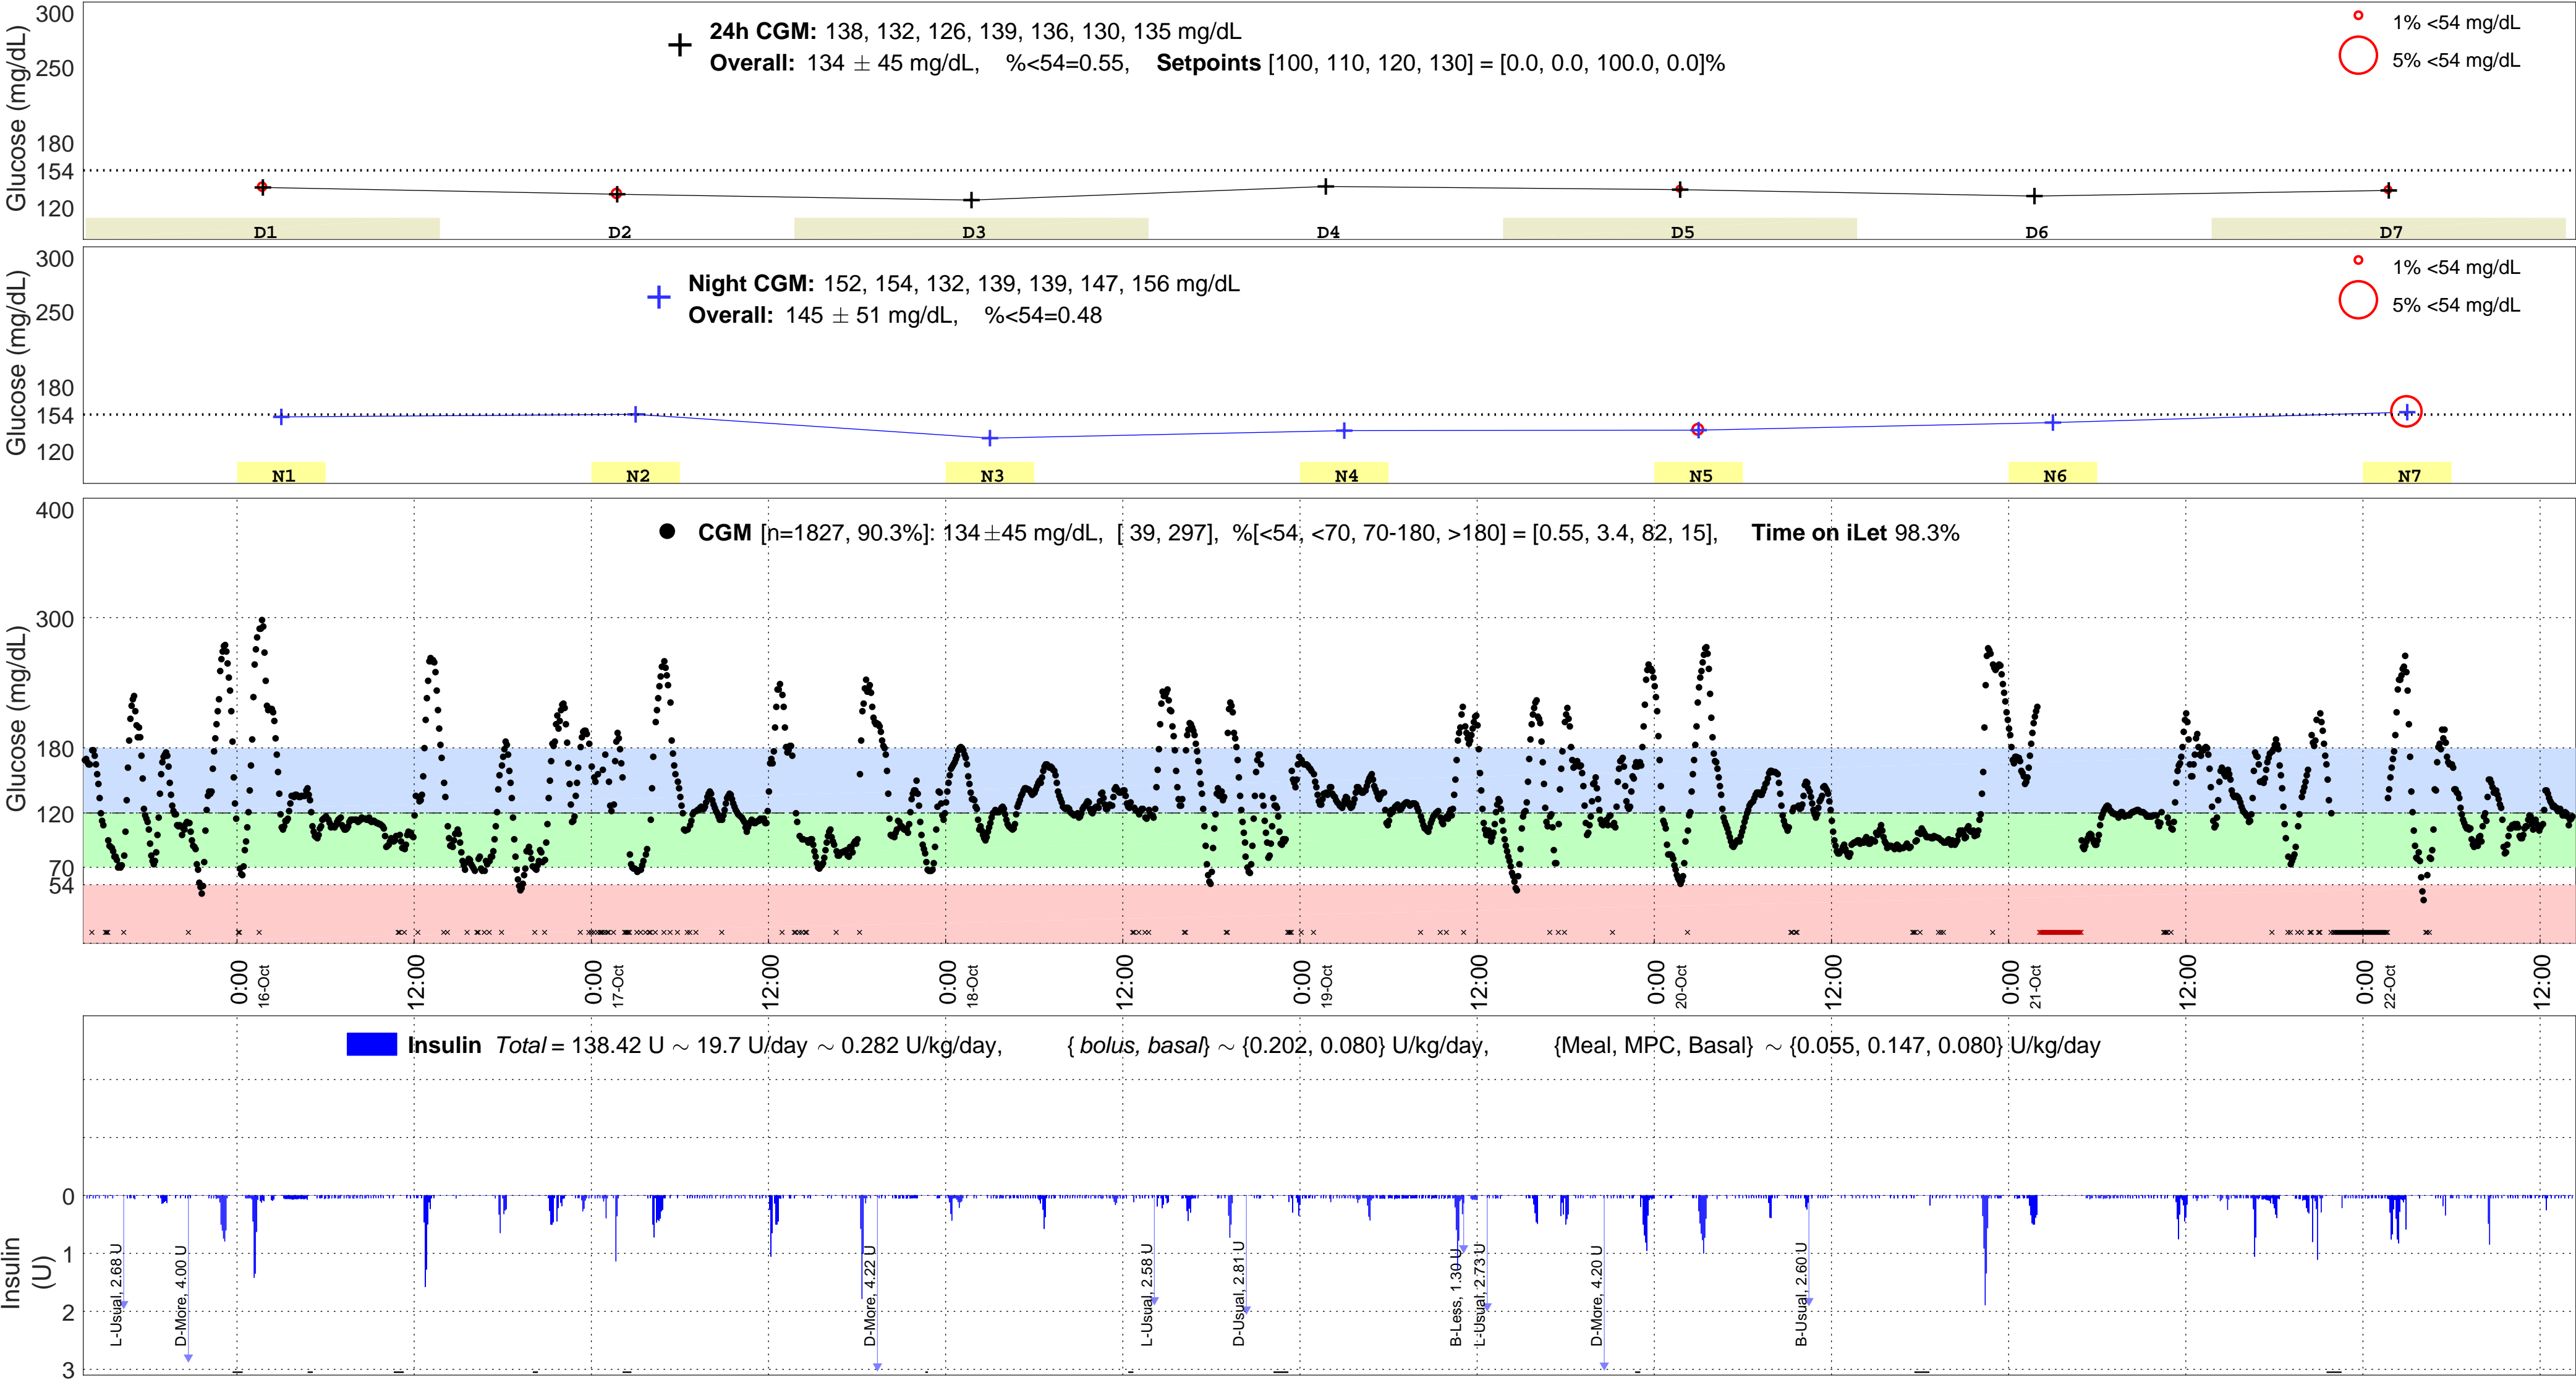

Control (UC-CF-MGH-04\_Wk1), 24-Sep-2021 00:03 to 30-Sep-2021 23:58[+7.0]

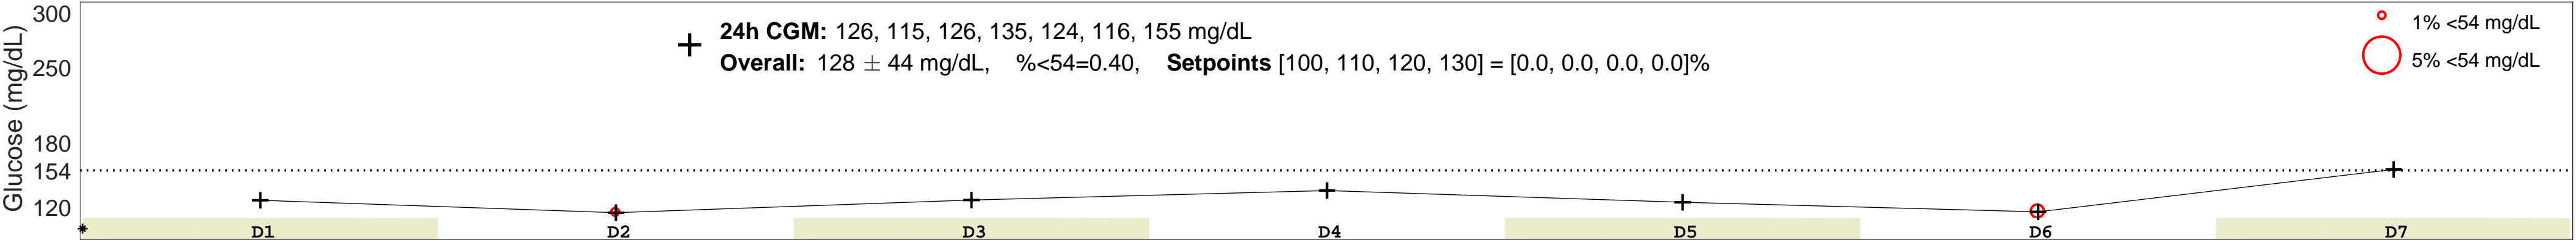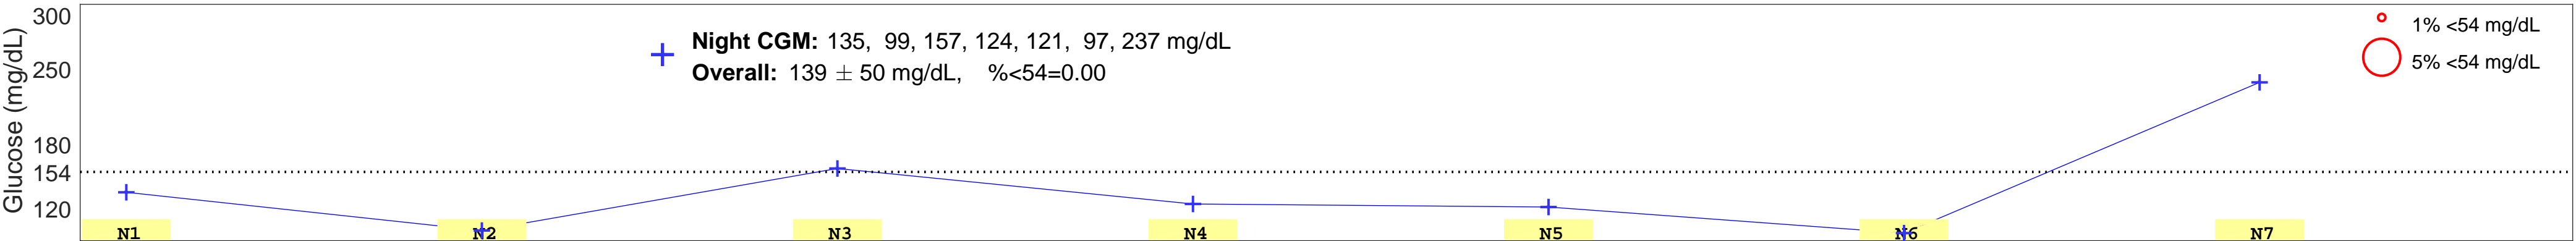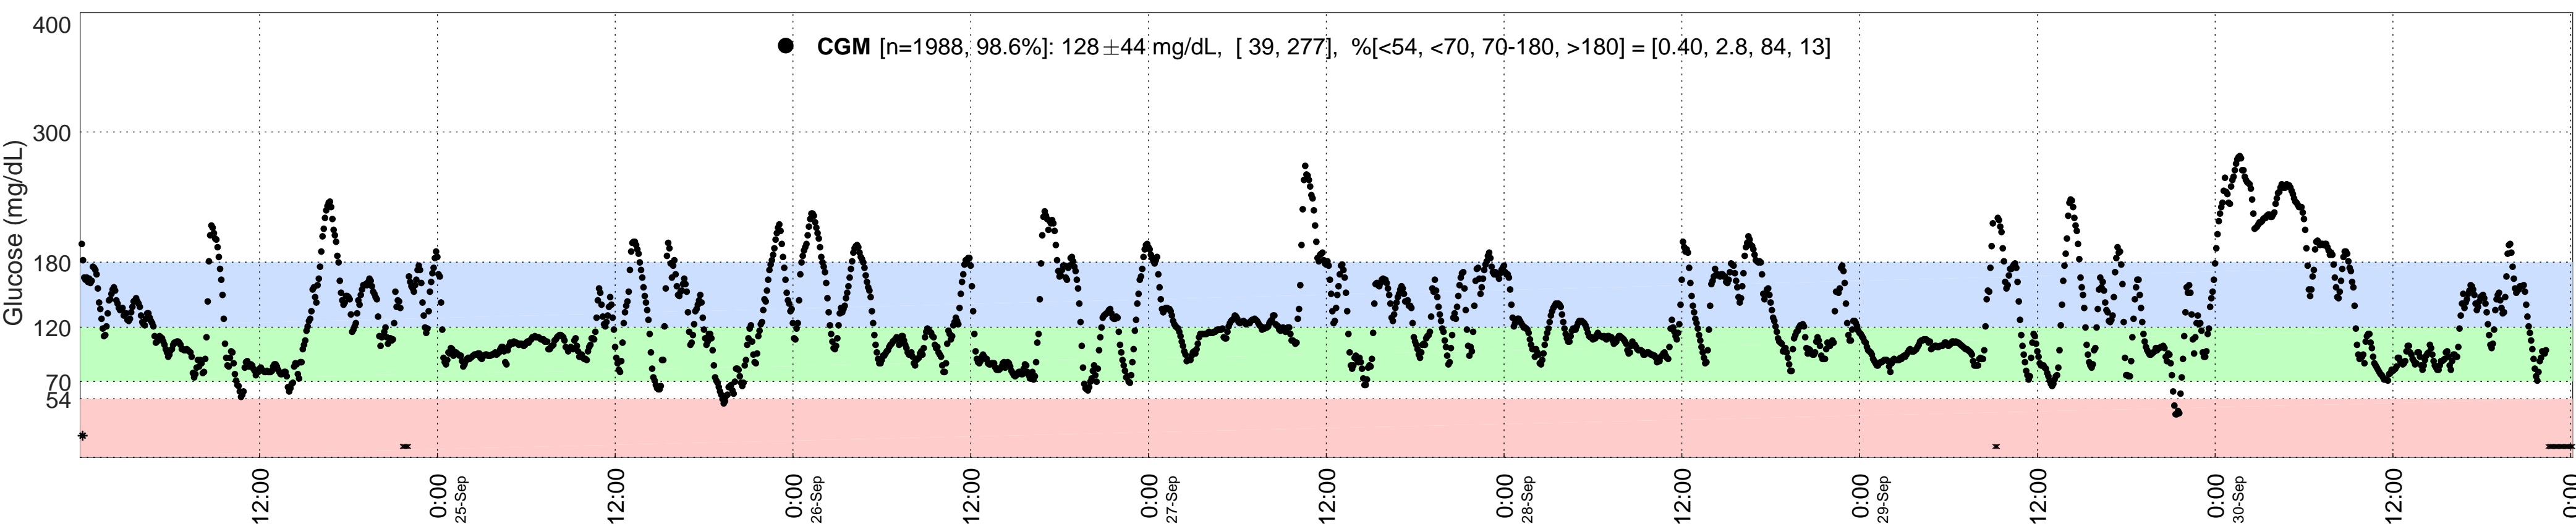

Control (UC-CF-MGH-04\_Wk2), 01-Oct-2021 00:03 to 08-Oct-2021 10:39[+7.4]

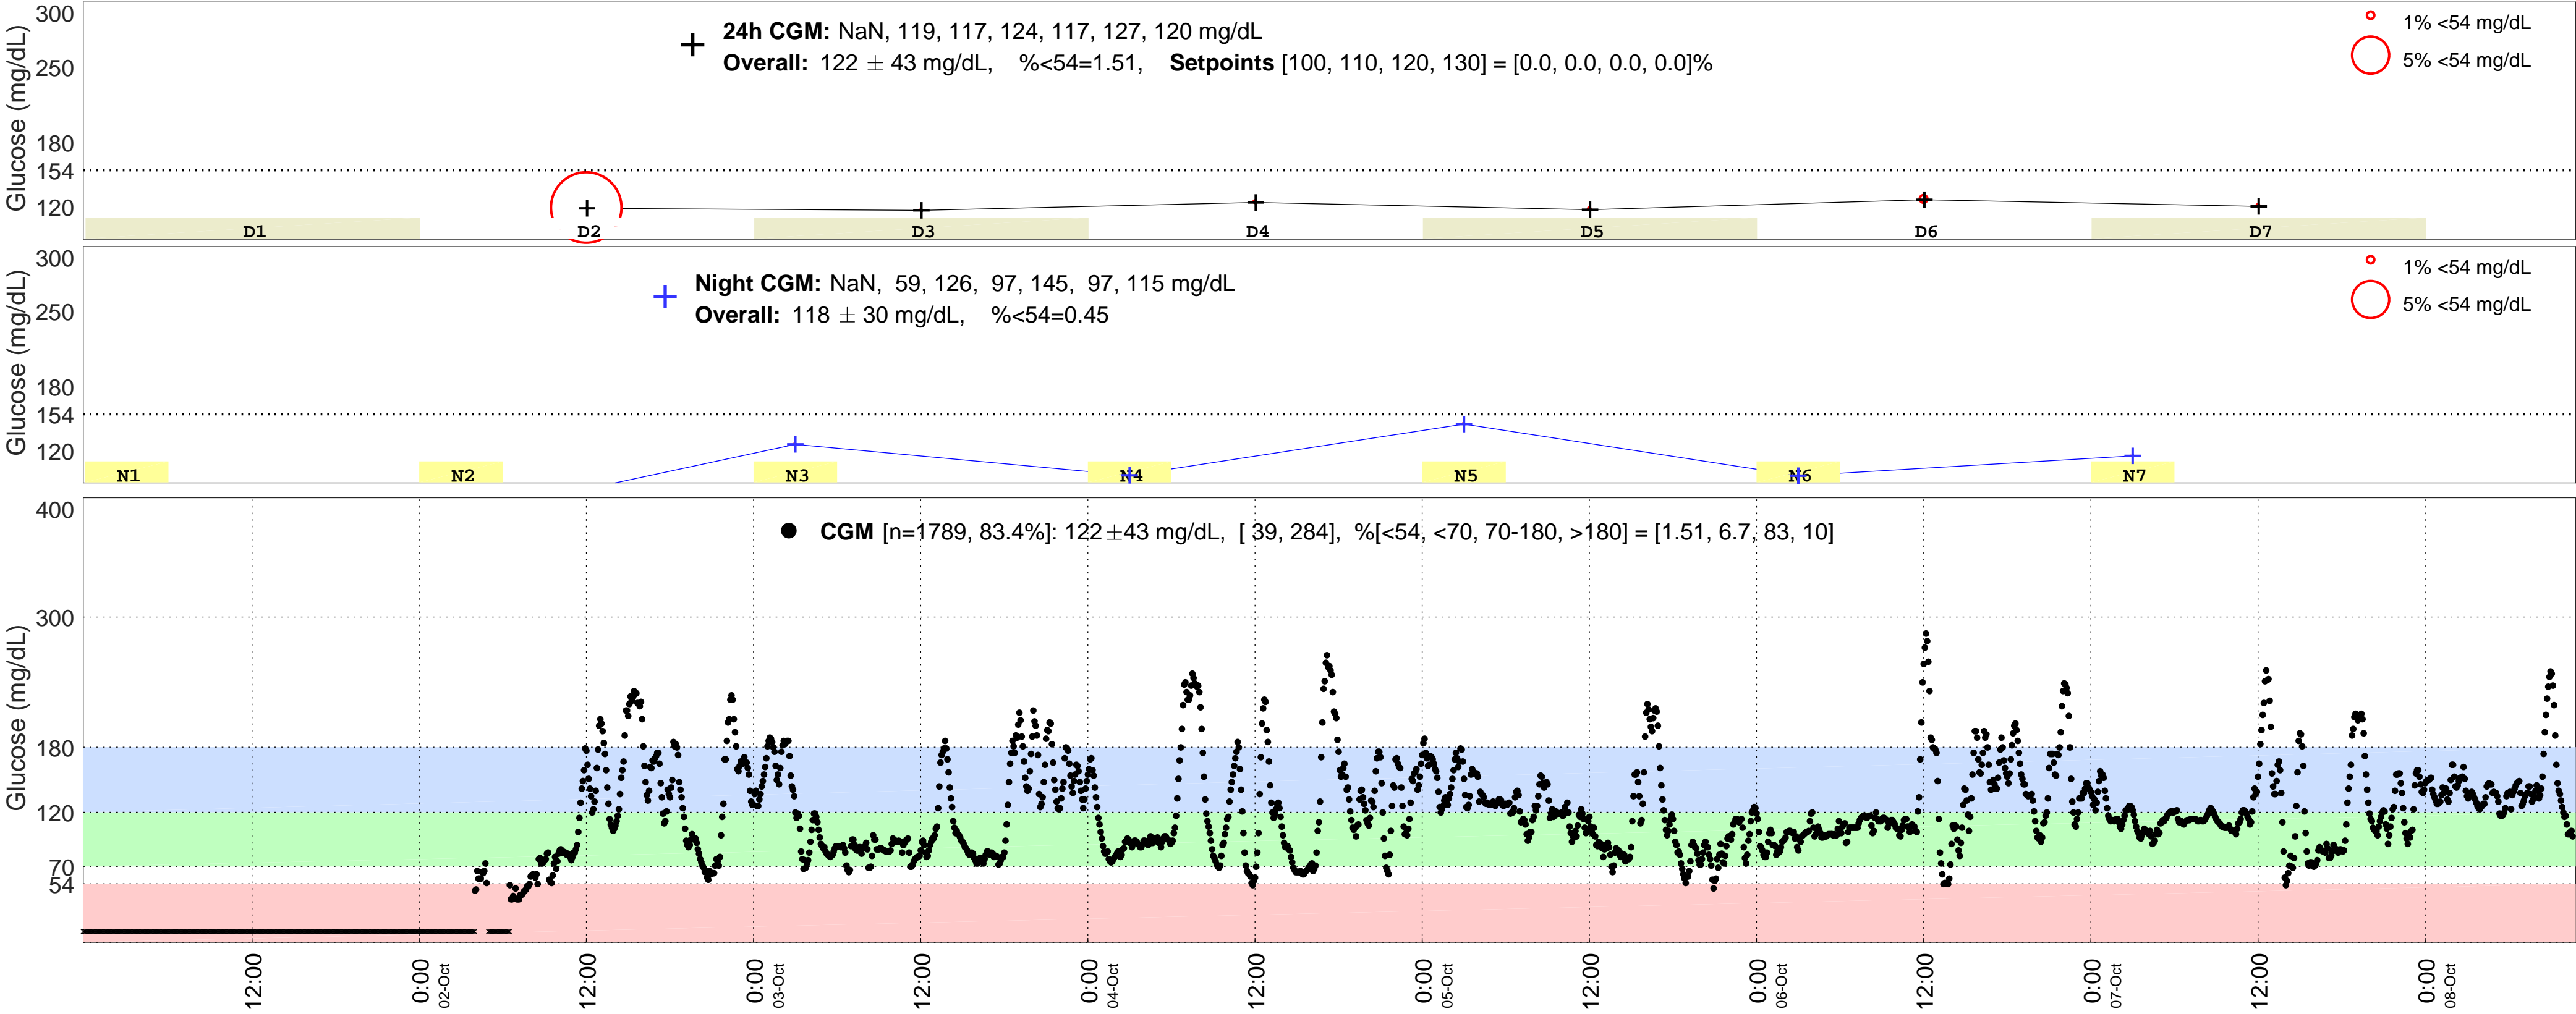

Bionic Pancreas (ID: CF-MGH-06-IM54\_Wk1, BM=73 kg), Insulin Only, 16-Nov-2021 11:31 to 23-Nov-2021 11:26[+7.0]

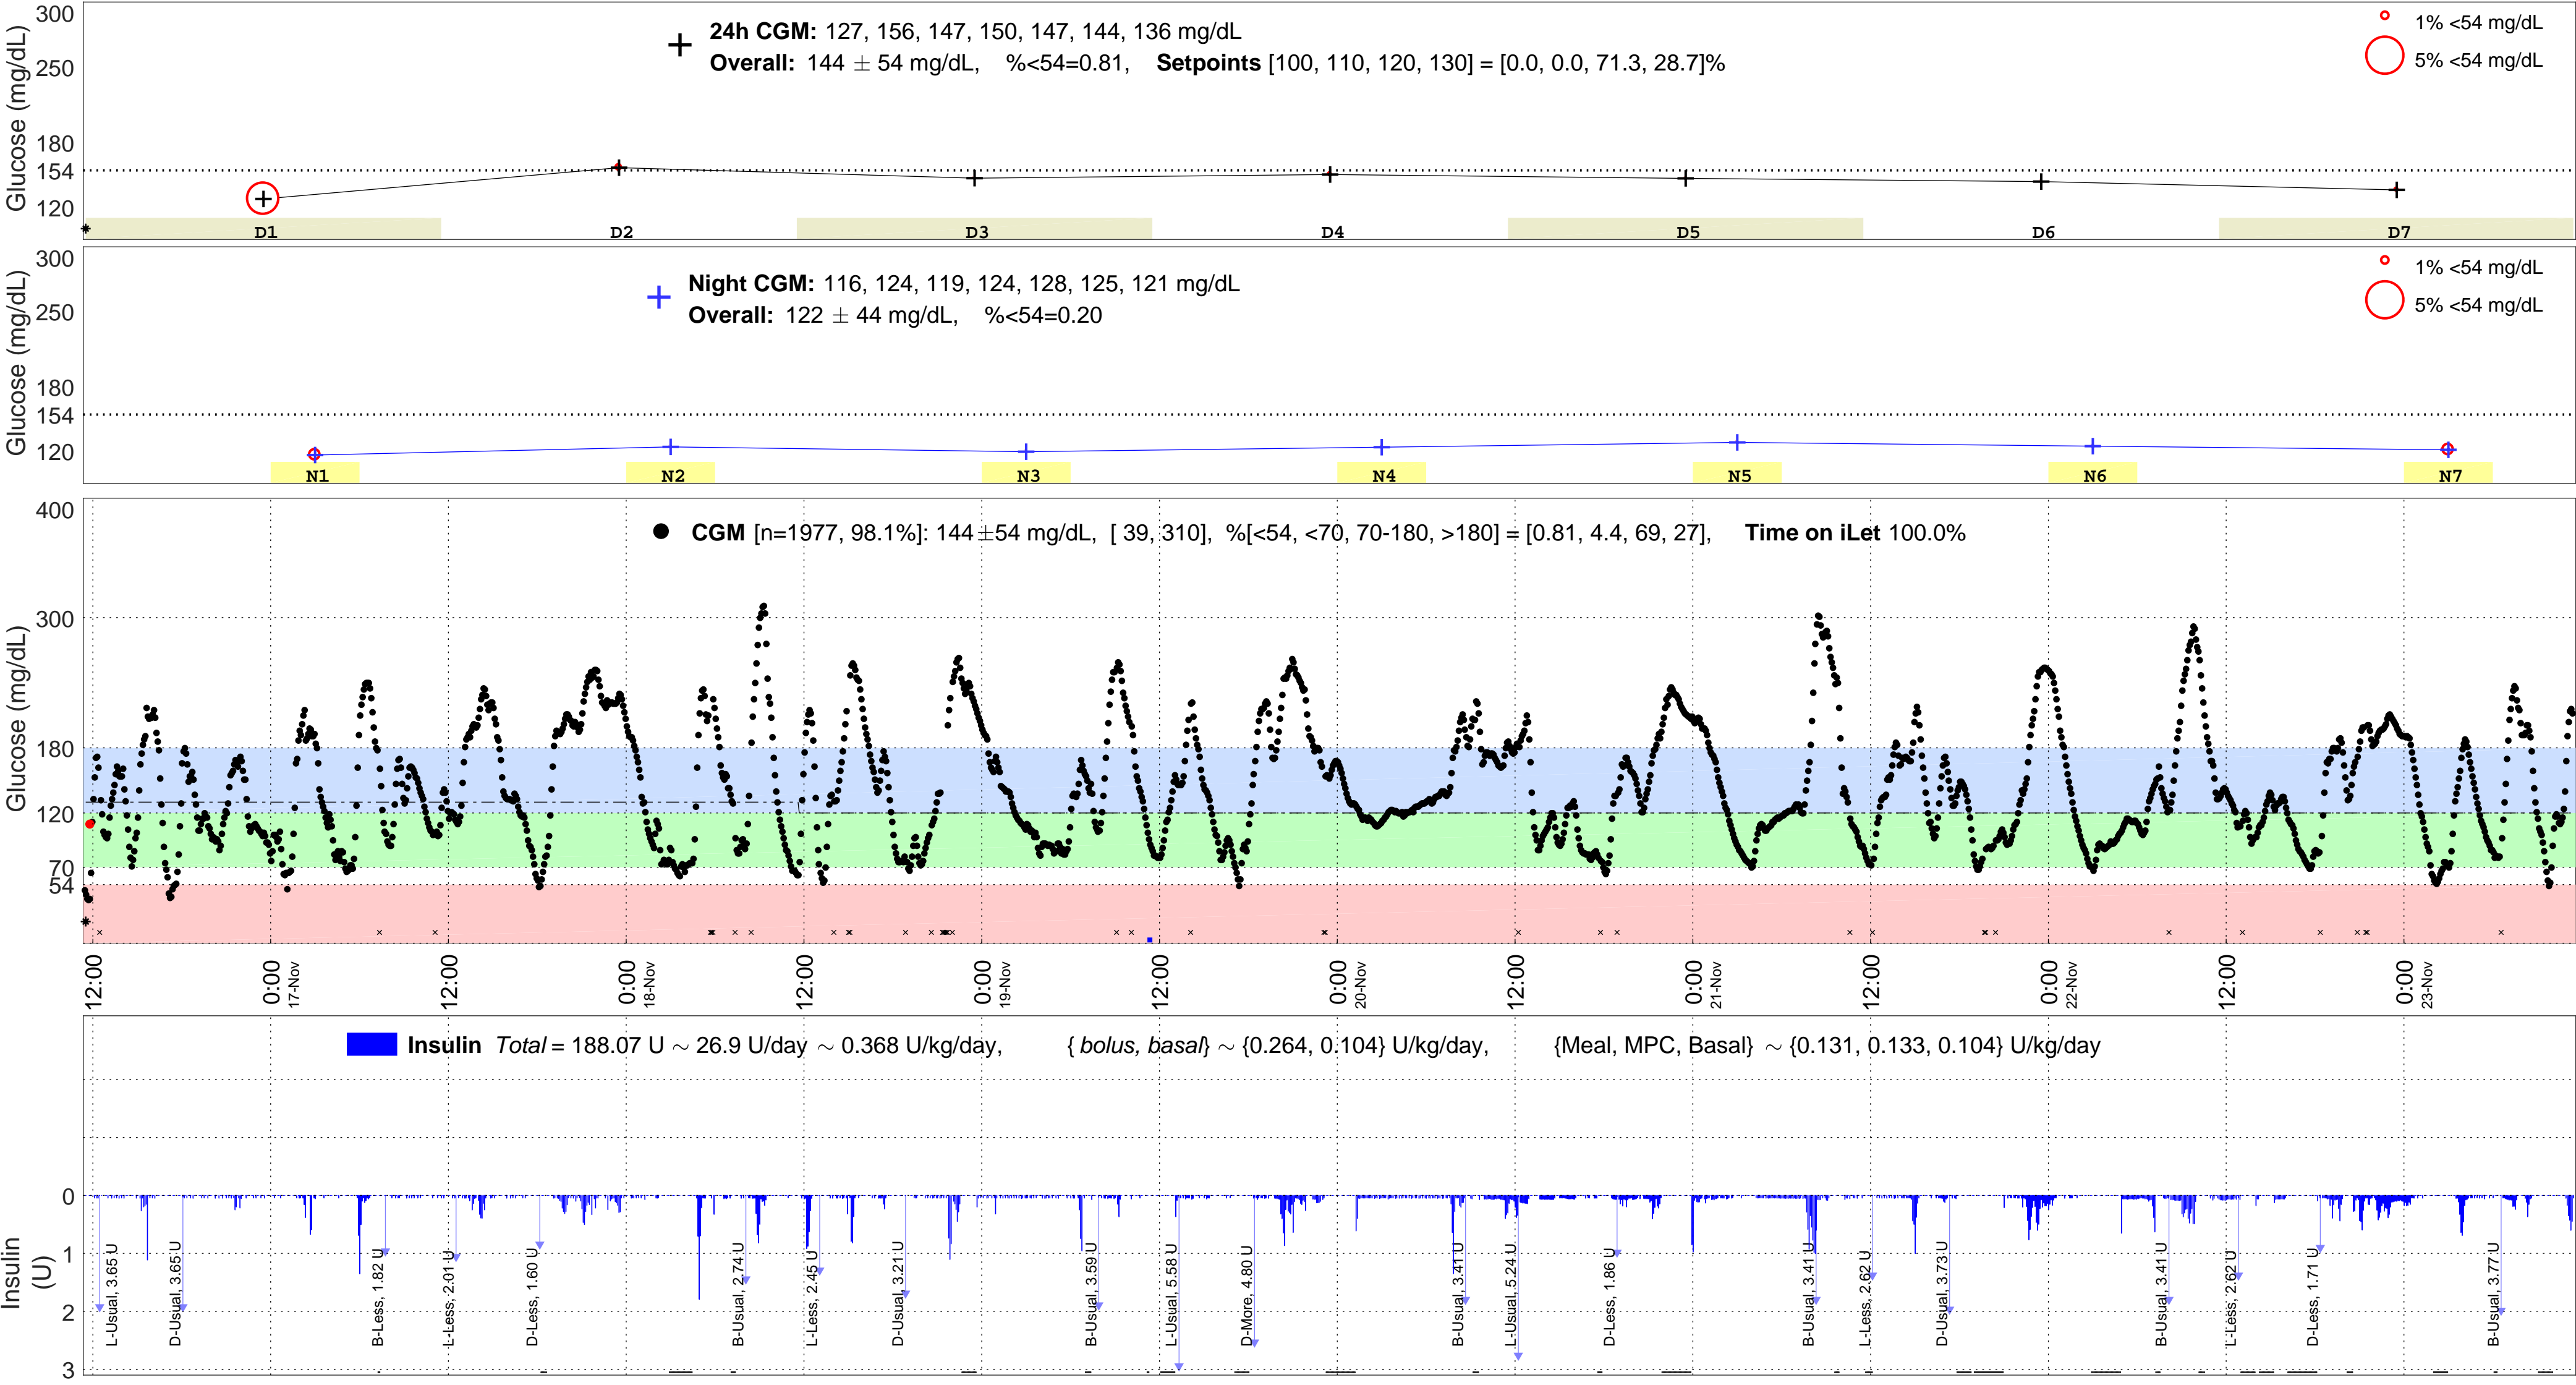

Bionic Pancreas (ID: CF-MGH-06-IM54\_Wk2, BM=73 kg), Insulin Only, 23-Nov-2021 11:31 to 30-Nov-2021 08:41[+6.9]

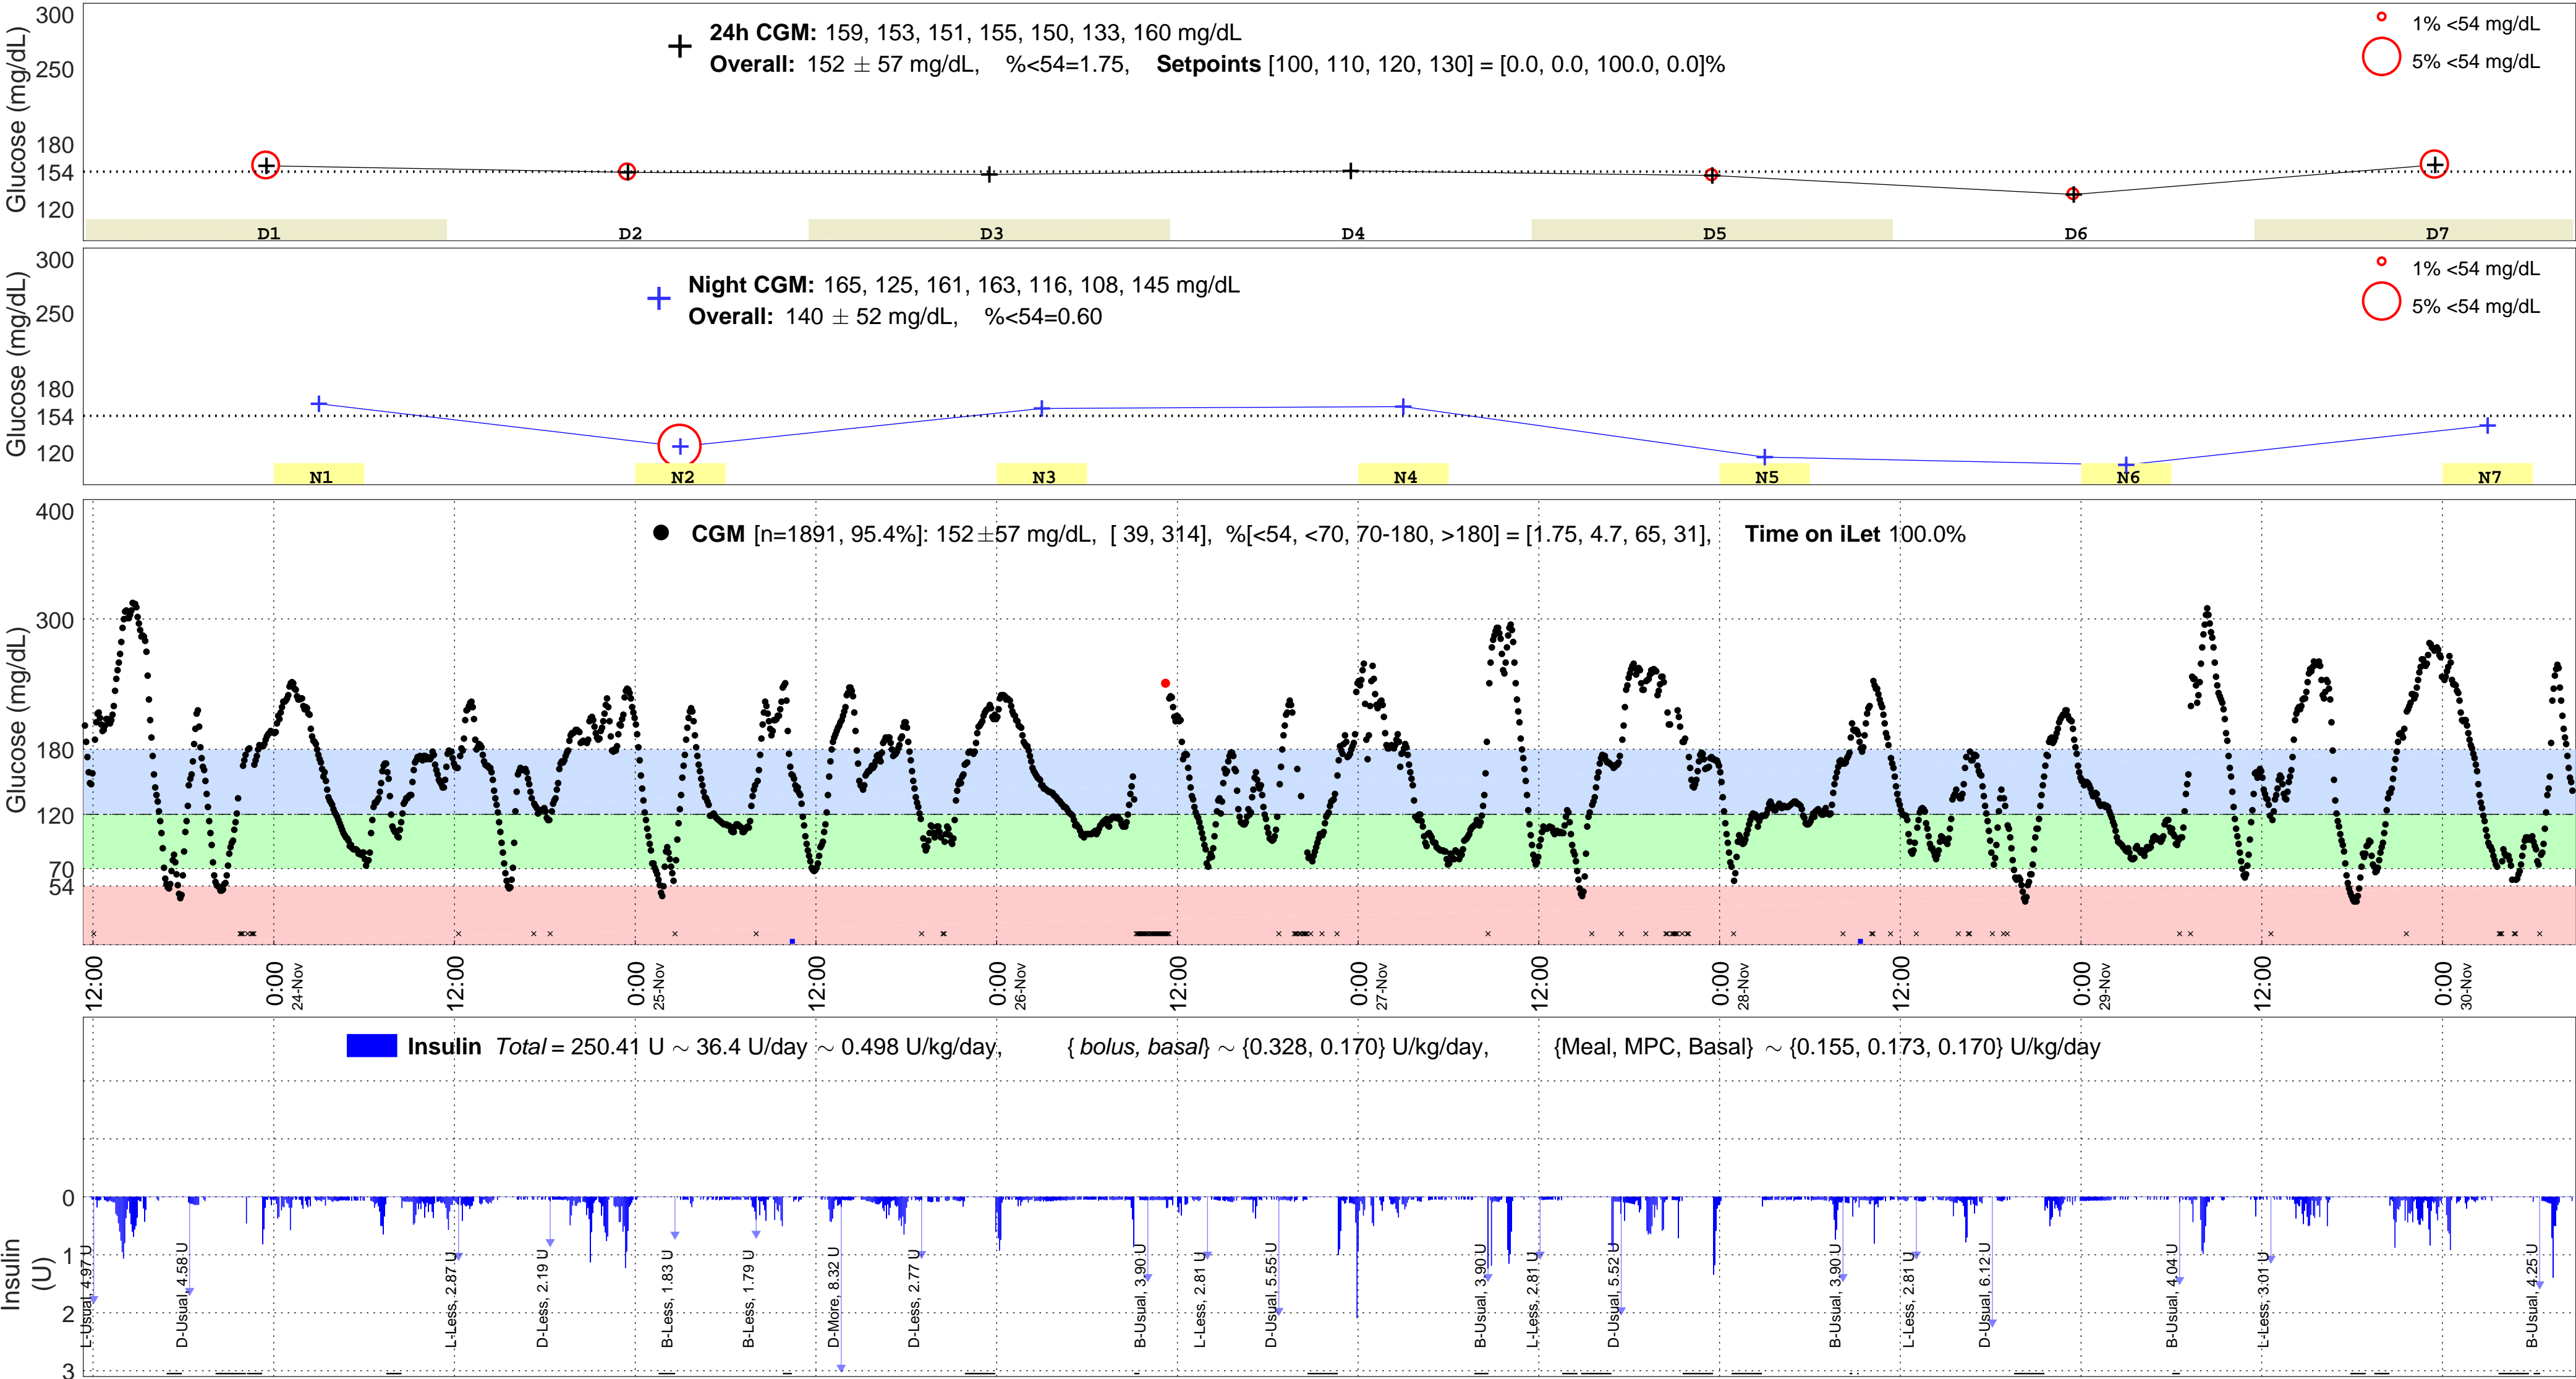



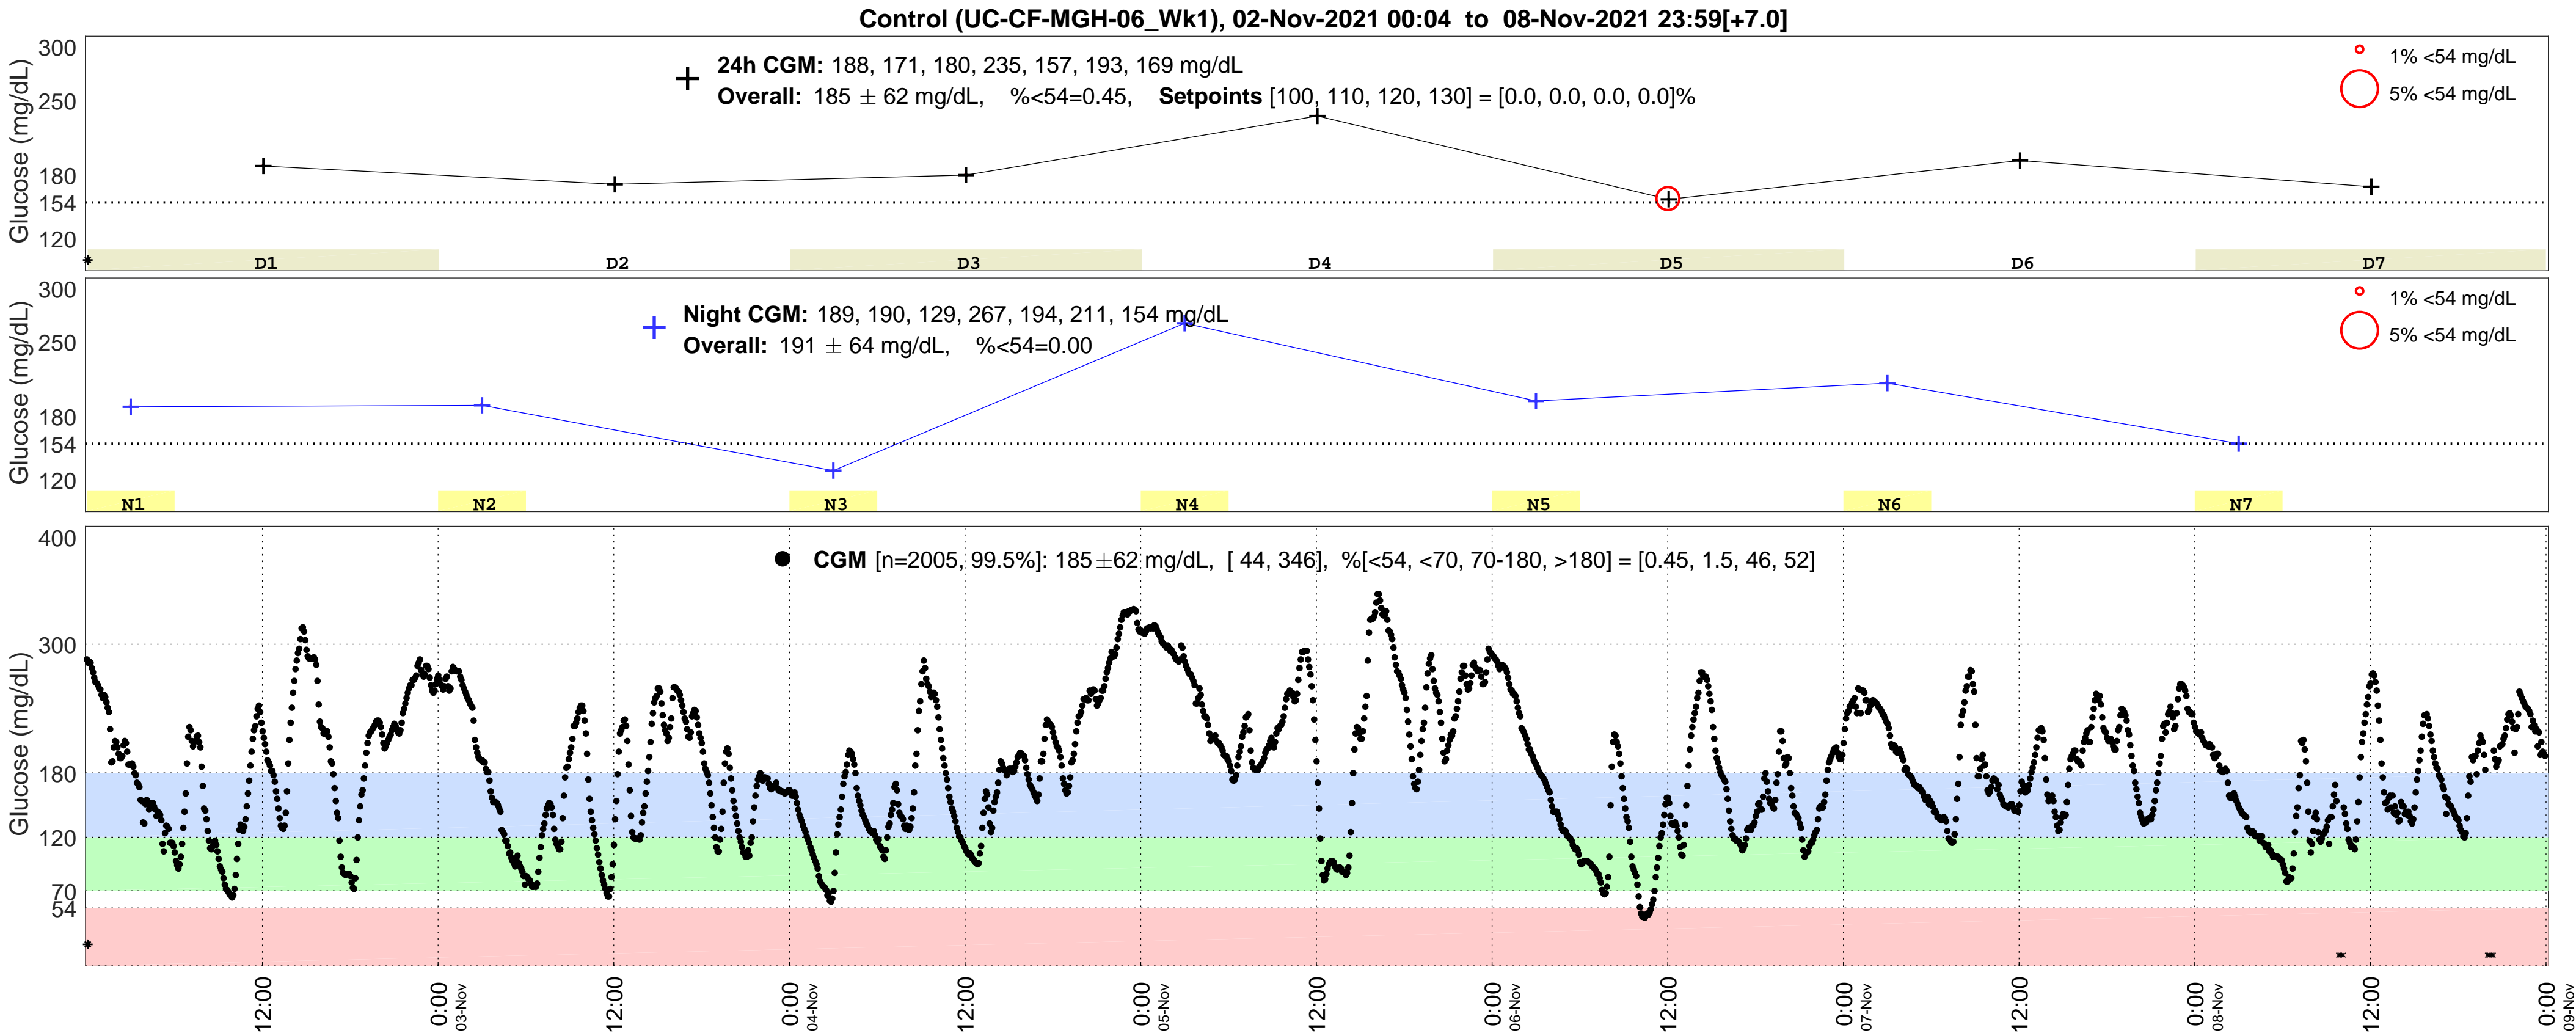

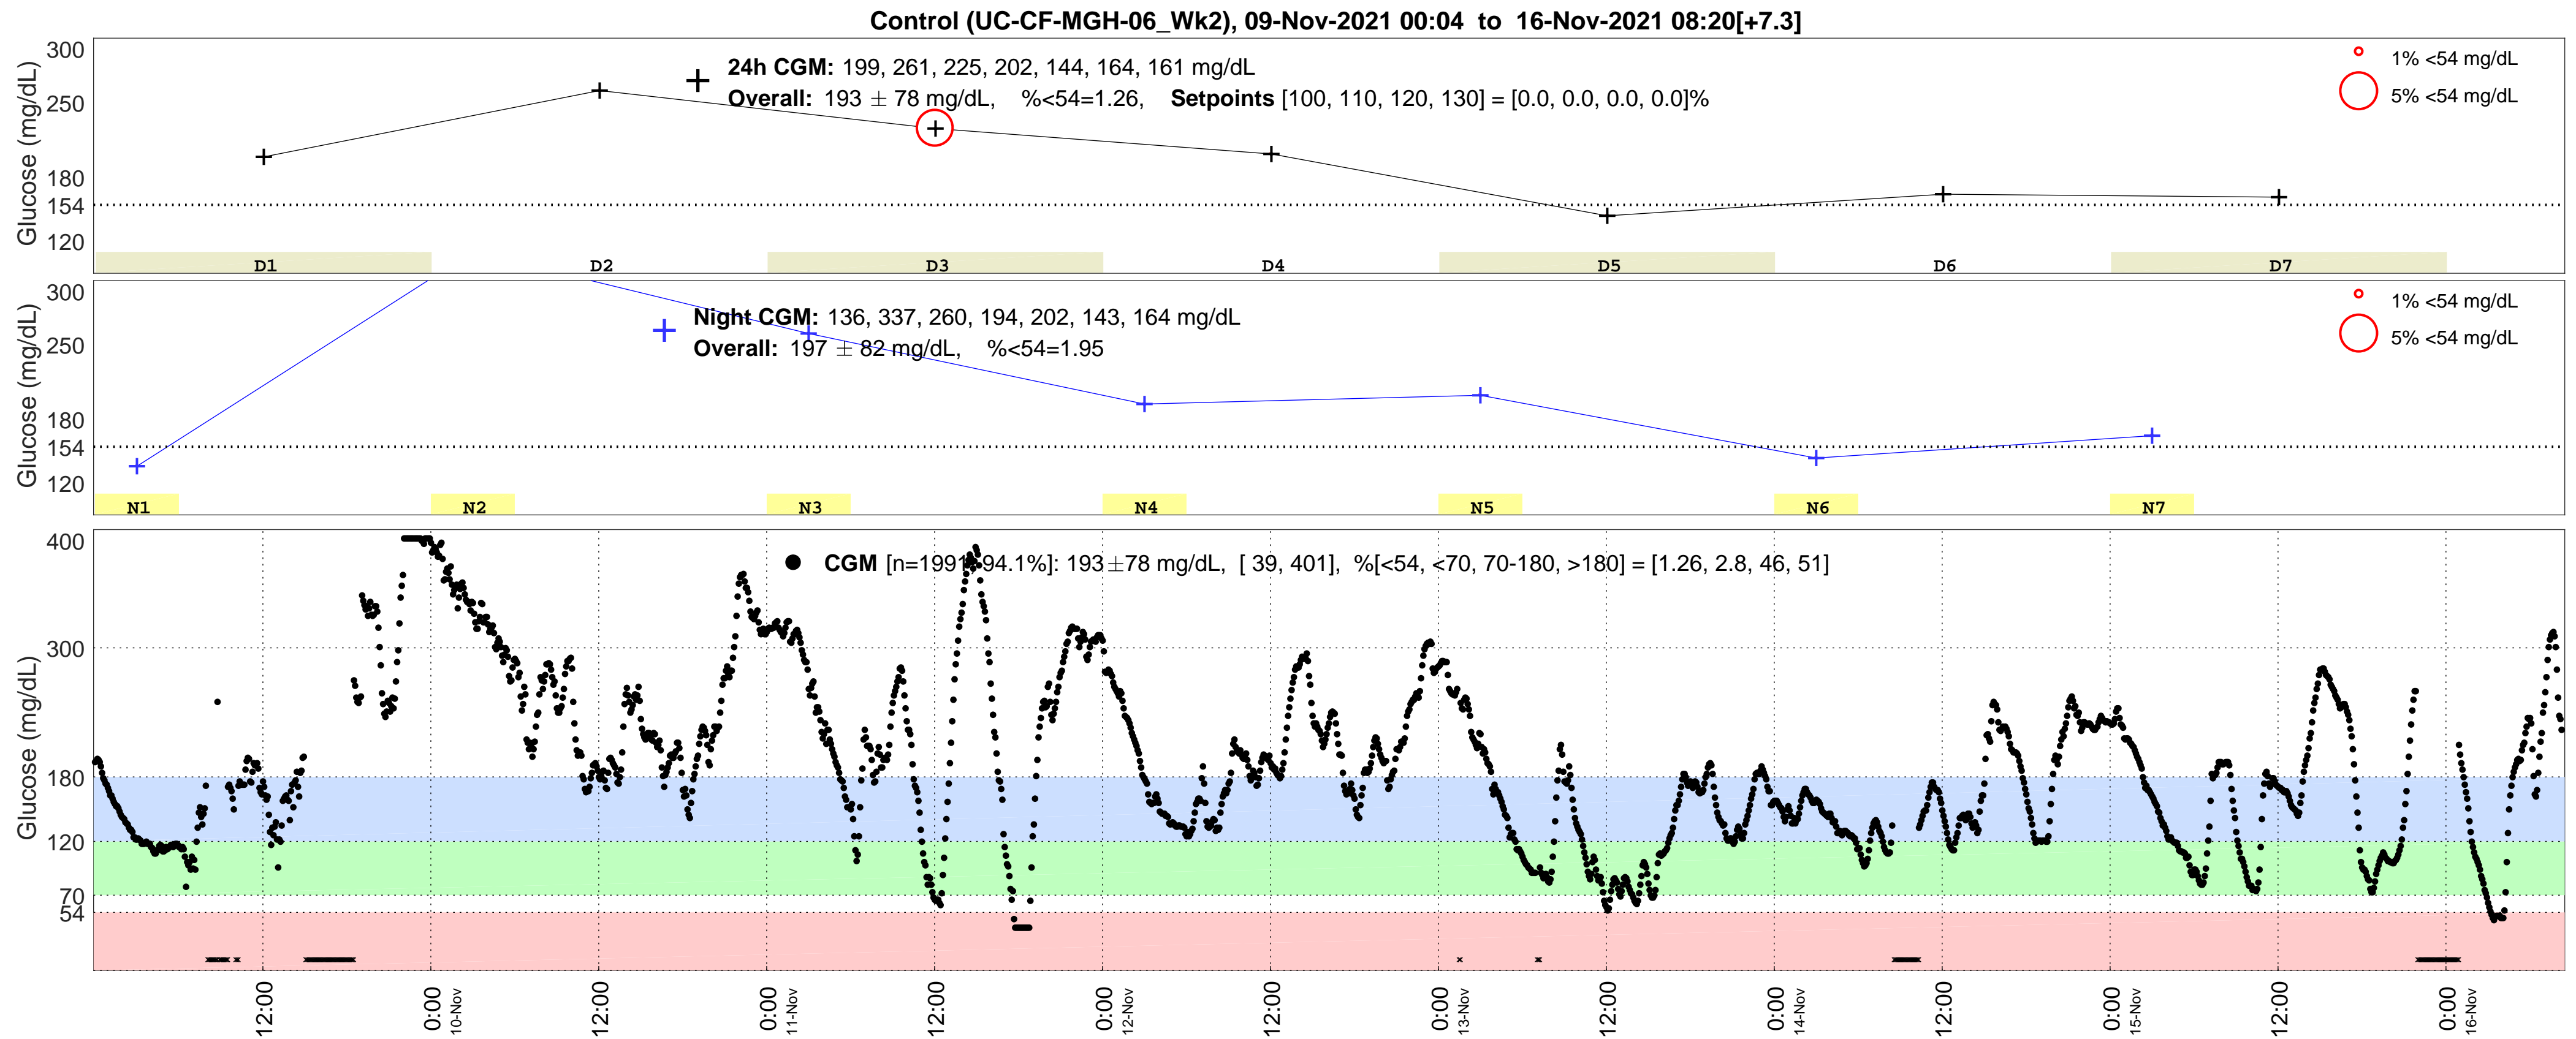

Bionic Pancreas (ID: CF-MGH-08-IP21\_Wk1, BM=62 kg), Insulin Only, 01-Jun-2022 14:29 to 08-Jun-2022 14:24[+7.0]

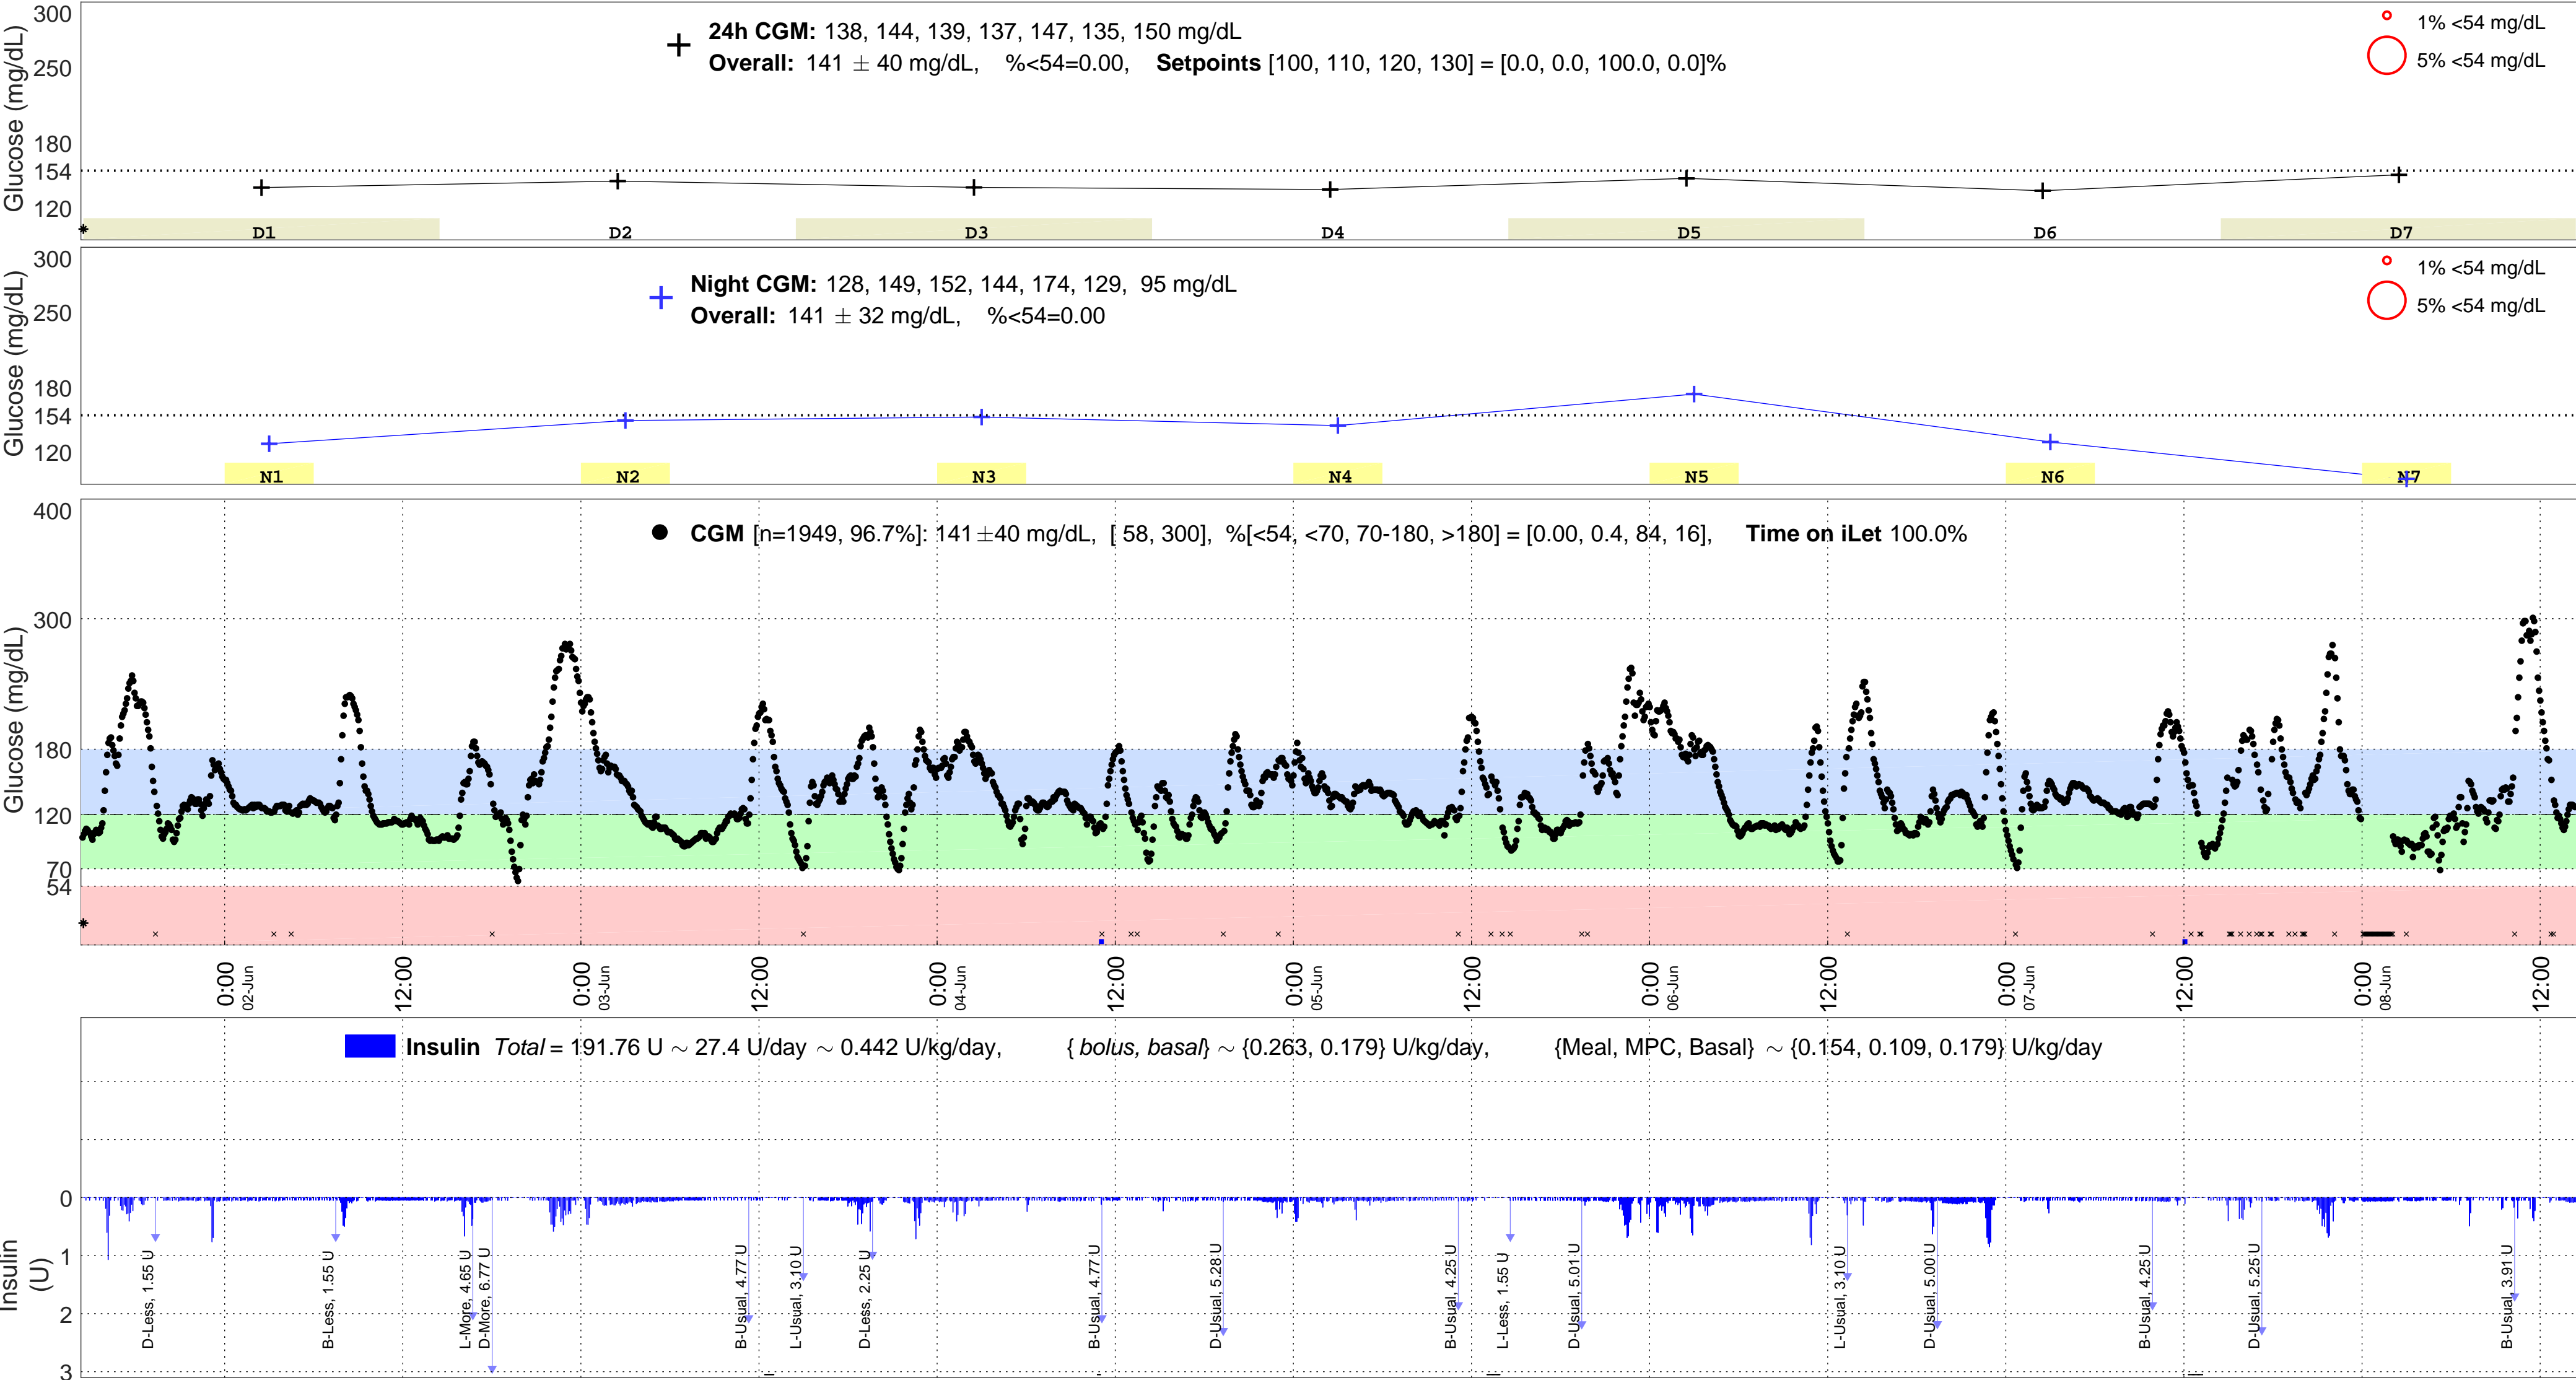

Bionic Pancreas (ID: CF-MGH-08-IP21\_Wk2, BM=62 kg), Insulin Only, 08-Jun-2022 14:29 to 15-Jun-2022 12:19[+6.9]

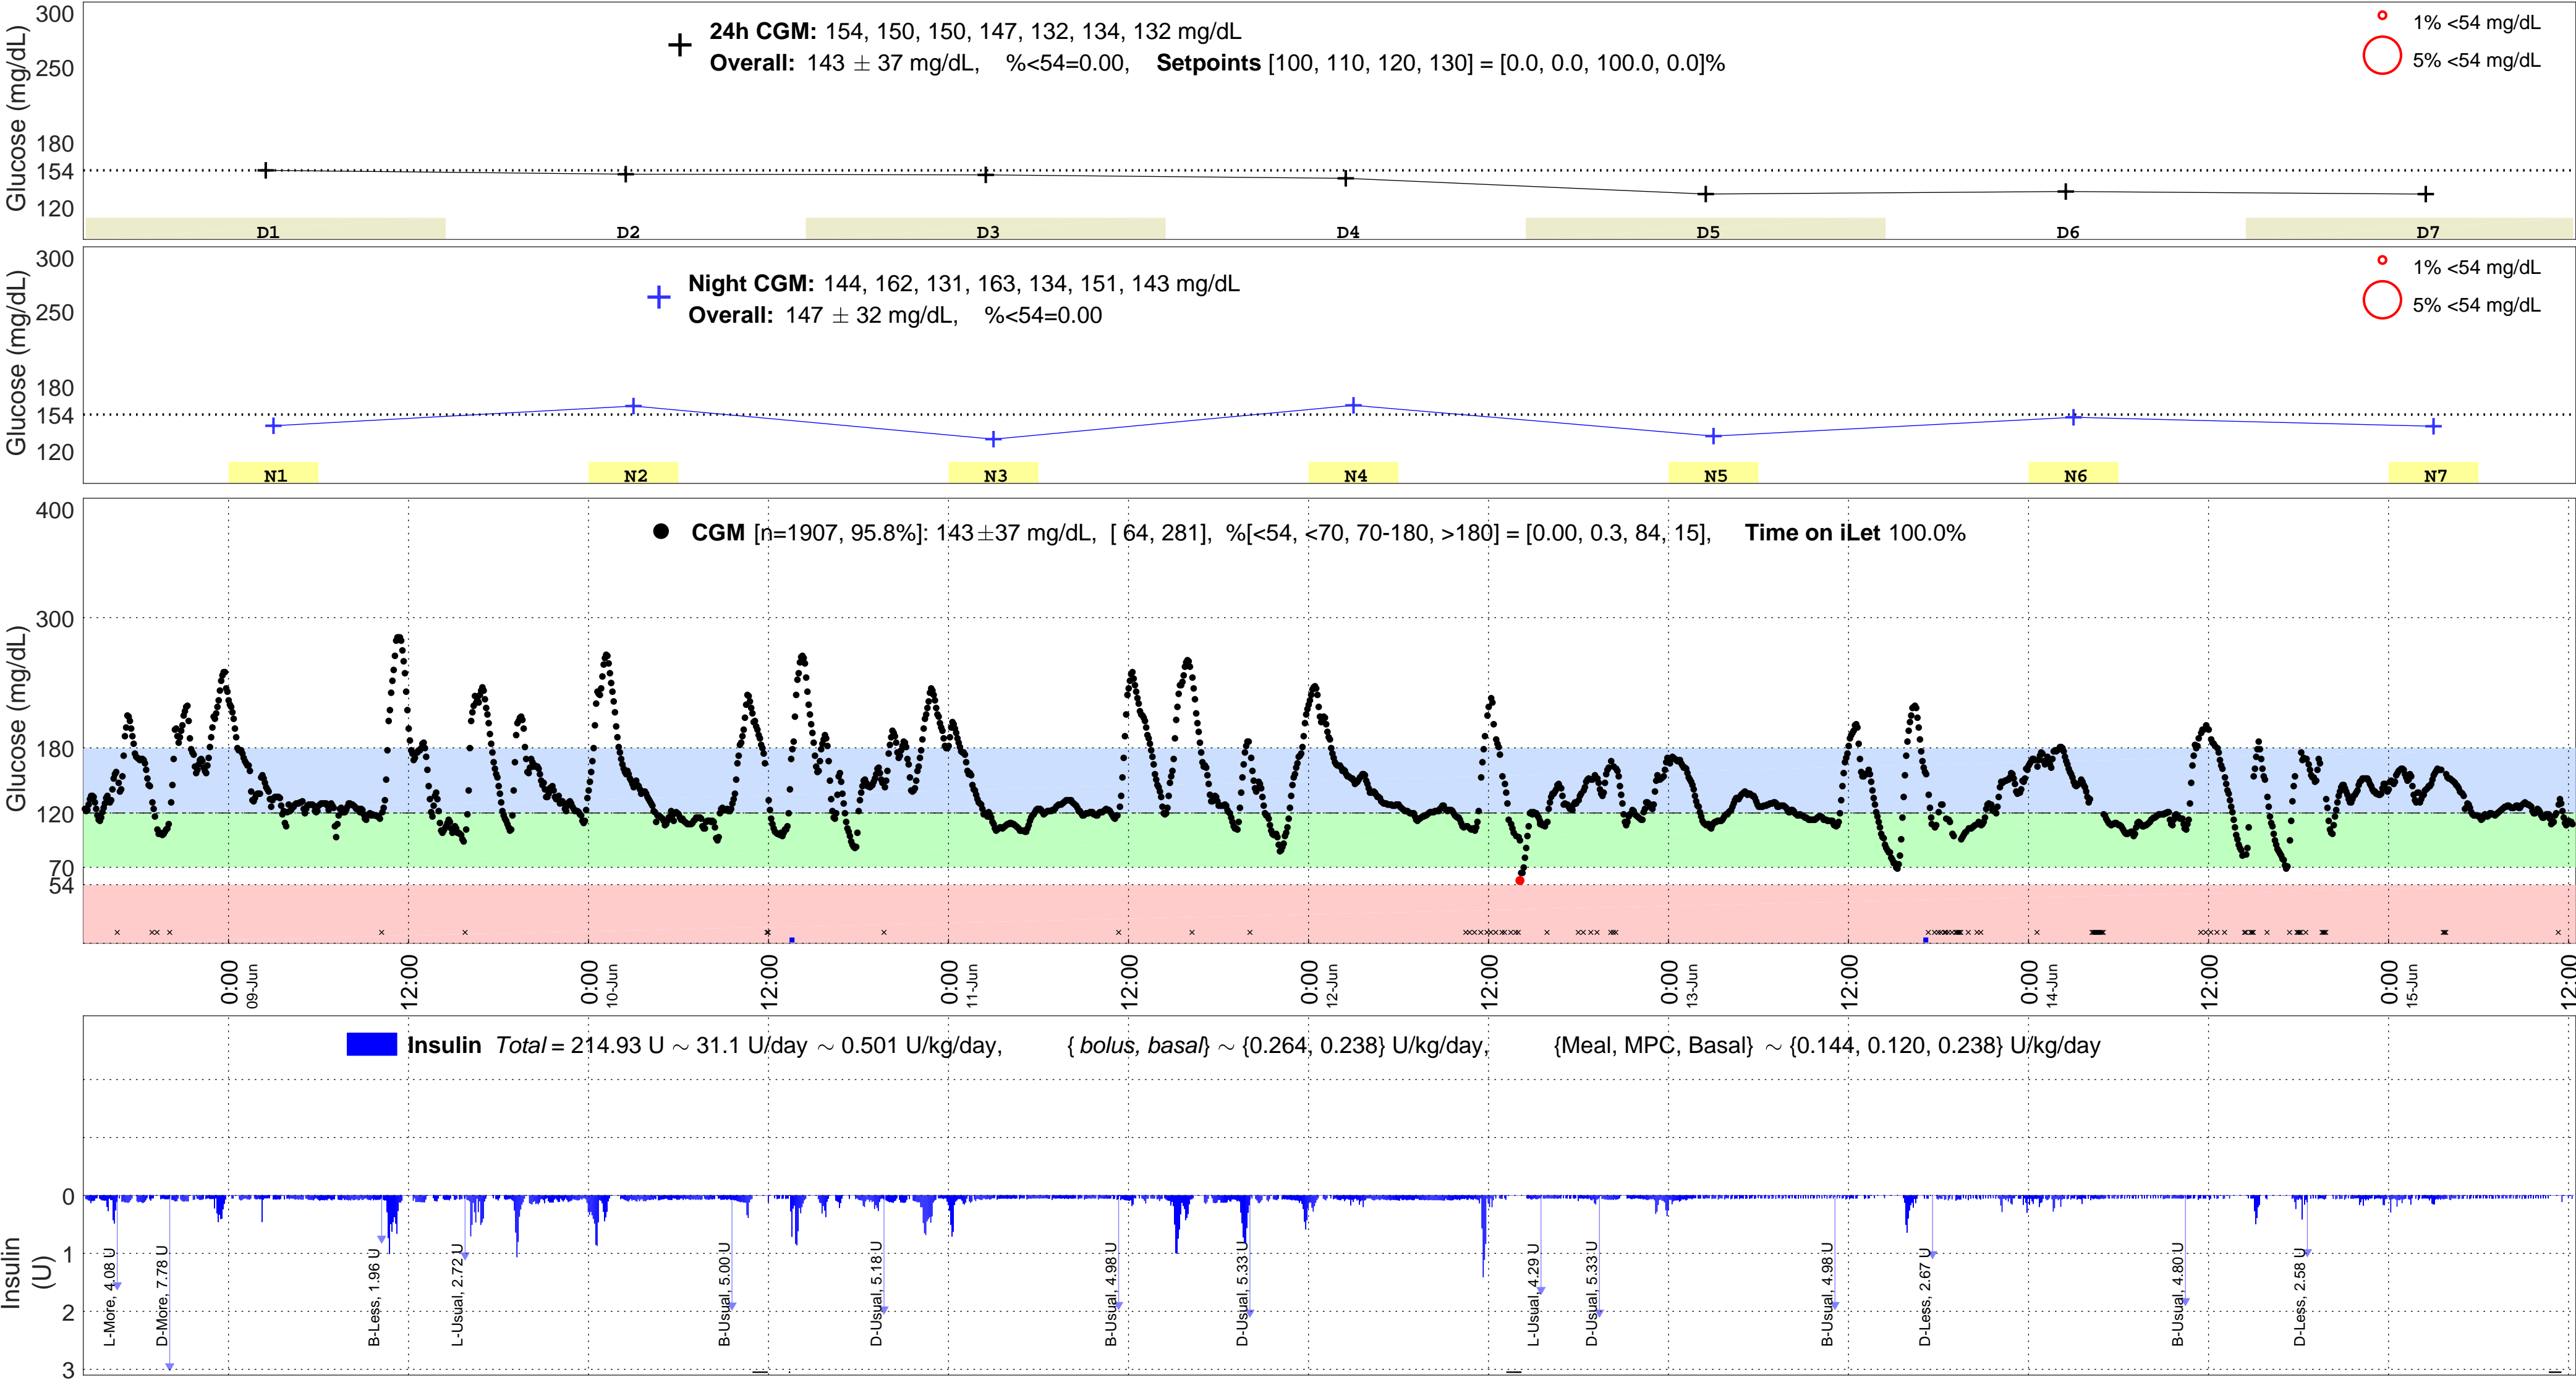

Control (UC-CF-MGH-08\_Wk1), 15-Jun-2022 12:19 to 22-Jun-2022 12:14[+7.0]

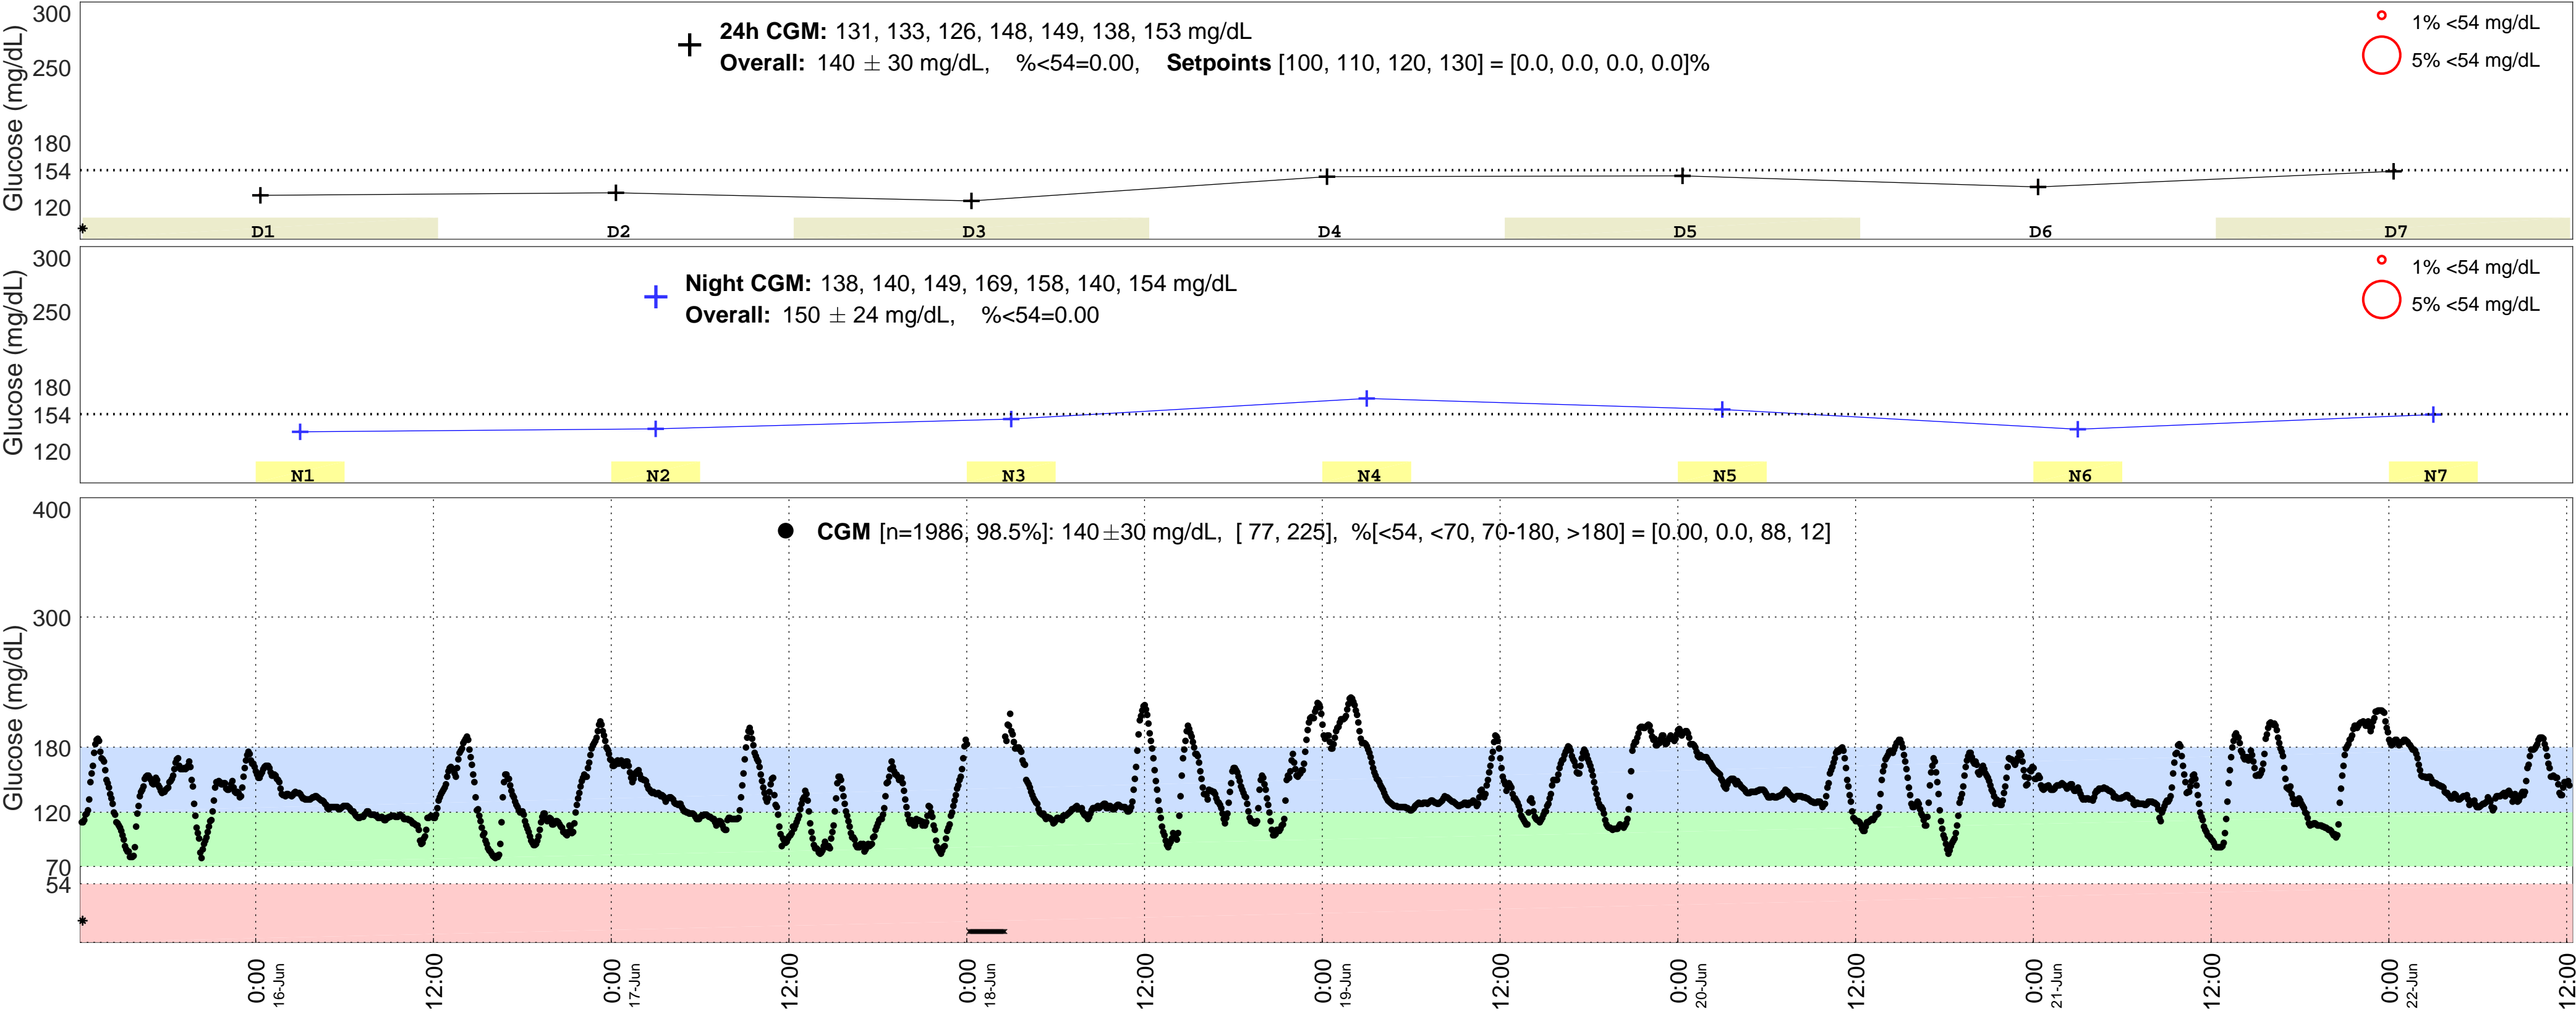



Control (UC-CF-MGH-08\_Wk2), 22-Jun-2022 12:19 to 29-Jun-2022 13:34[+7.1]

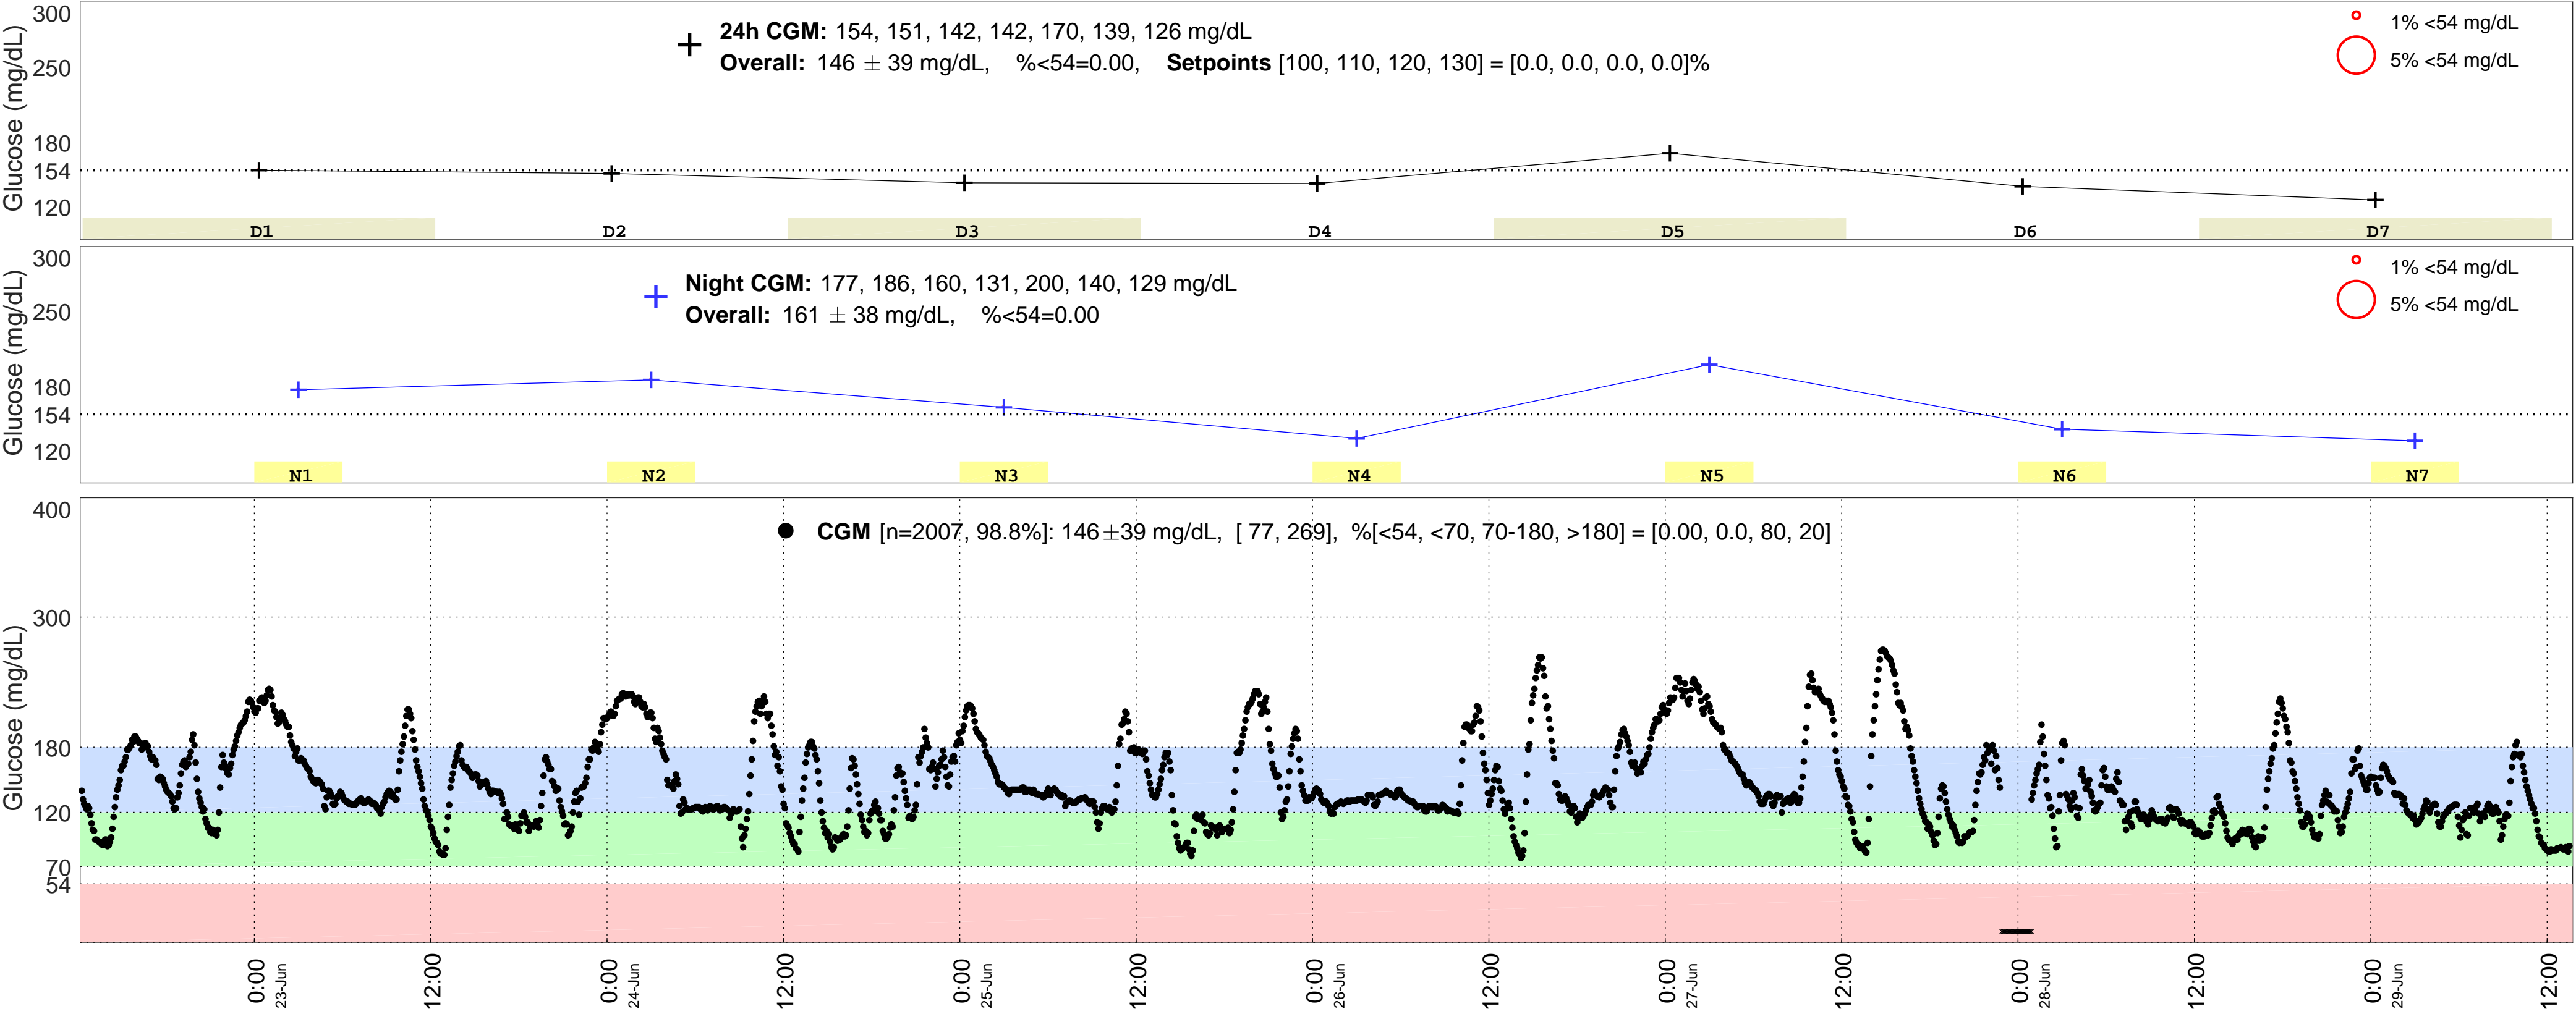

Bionic Pancreas (ID: CF-MGH-09-IP37\_Wk1, BM=49 kg), Insulin Only, 17-May-2022 14:04 to 24-May-2022 13:59[+7.0]

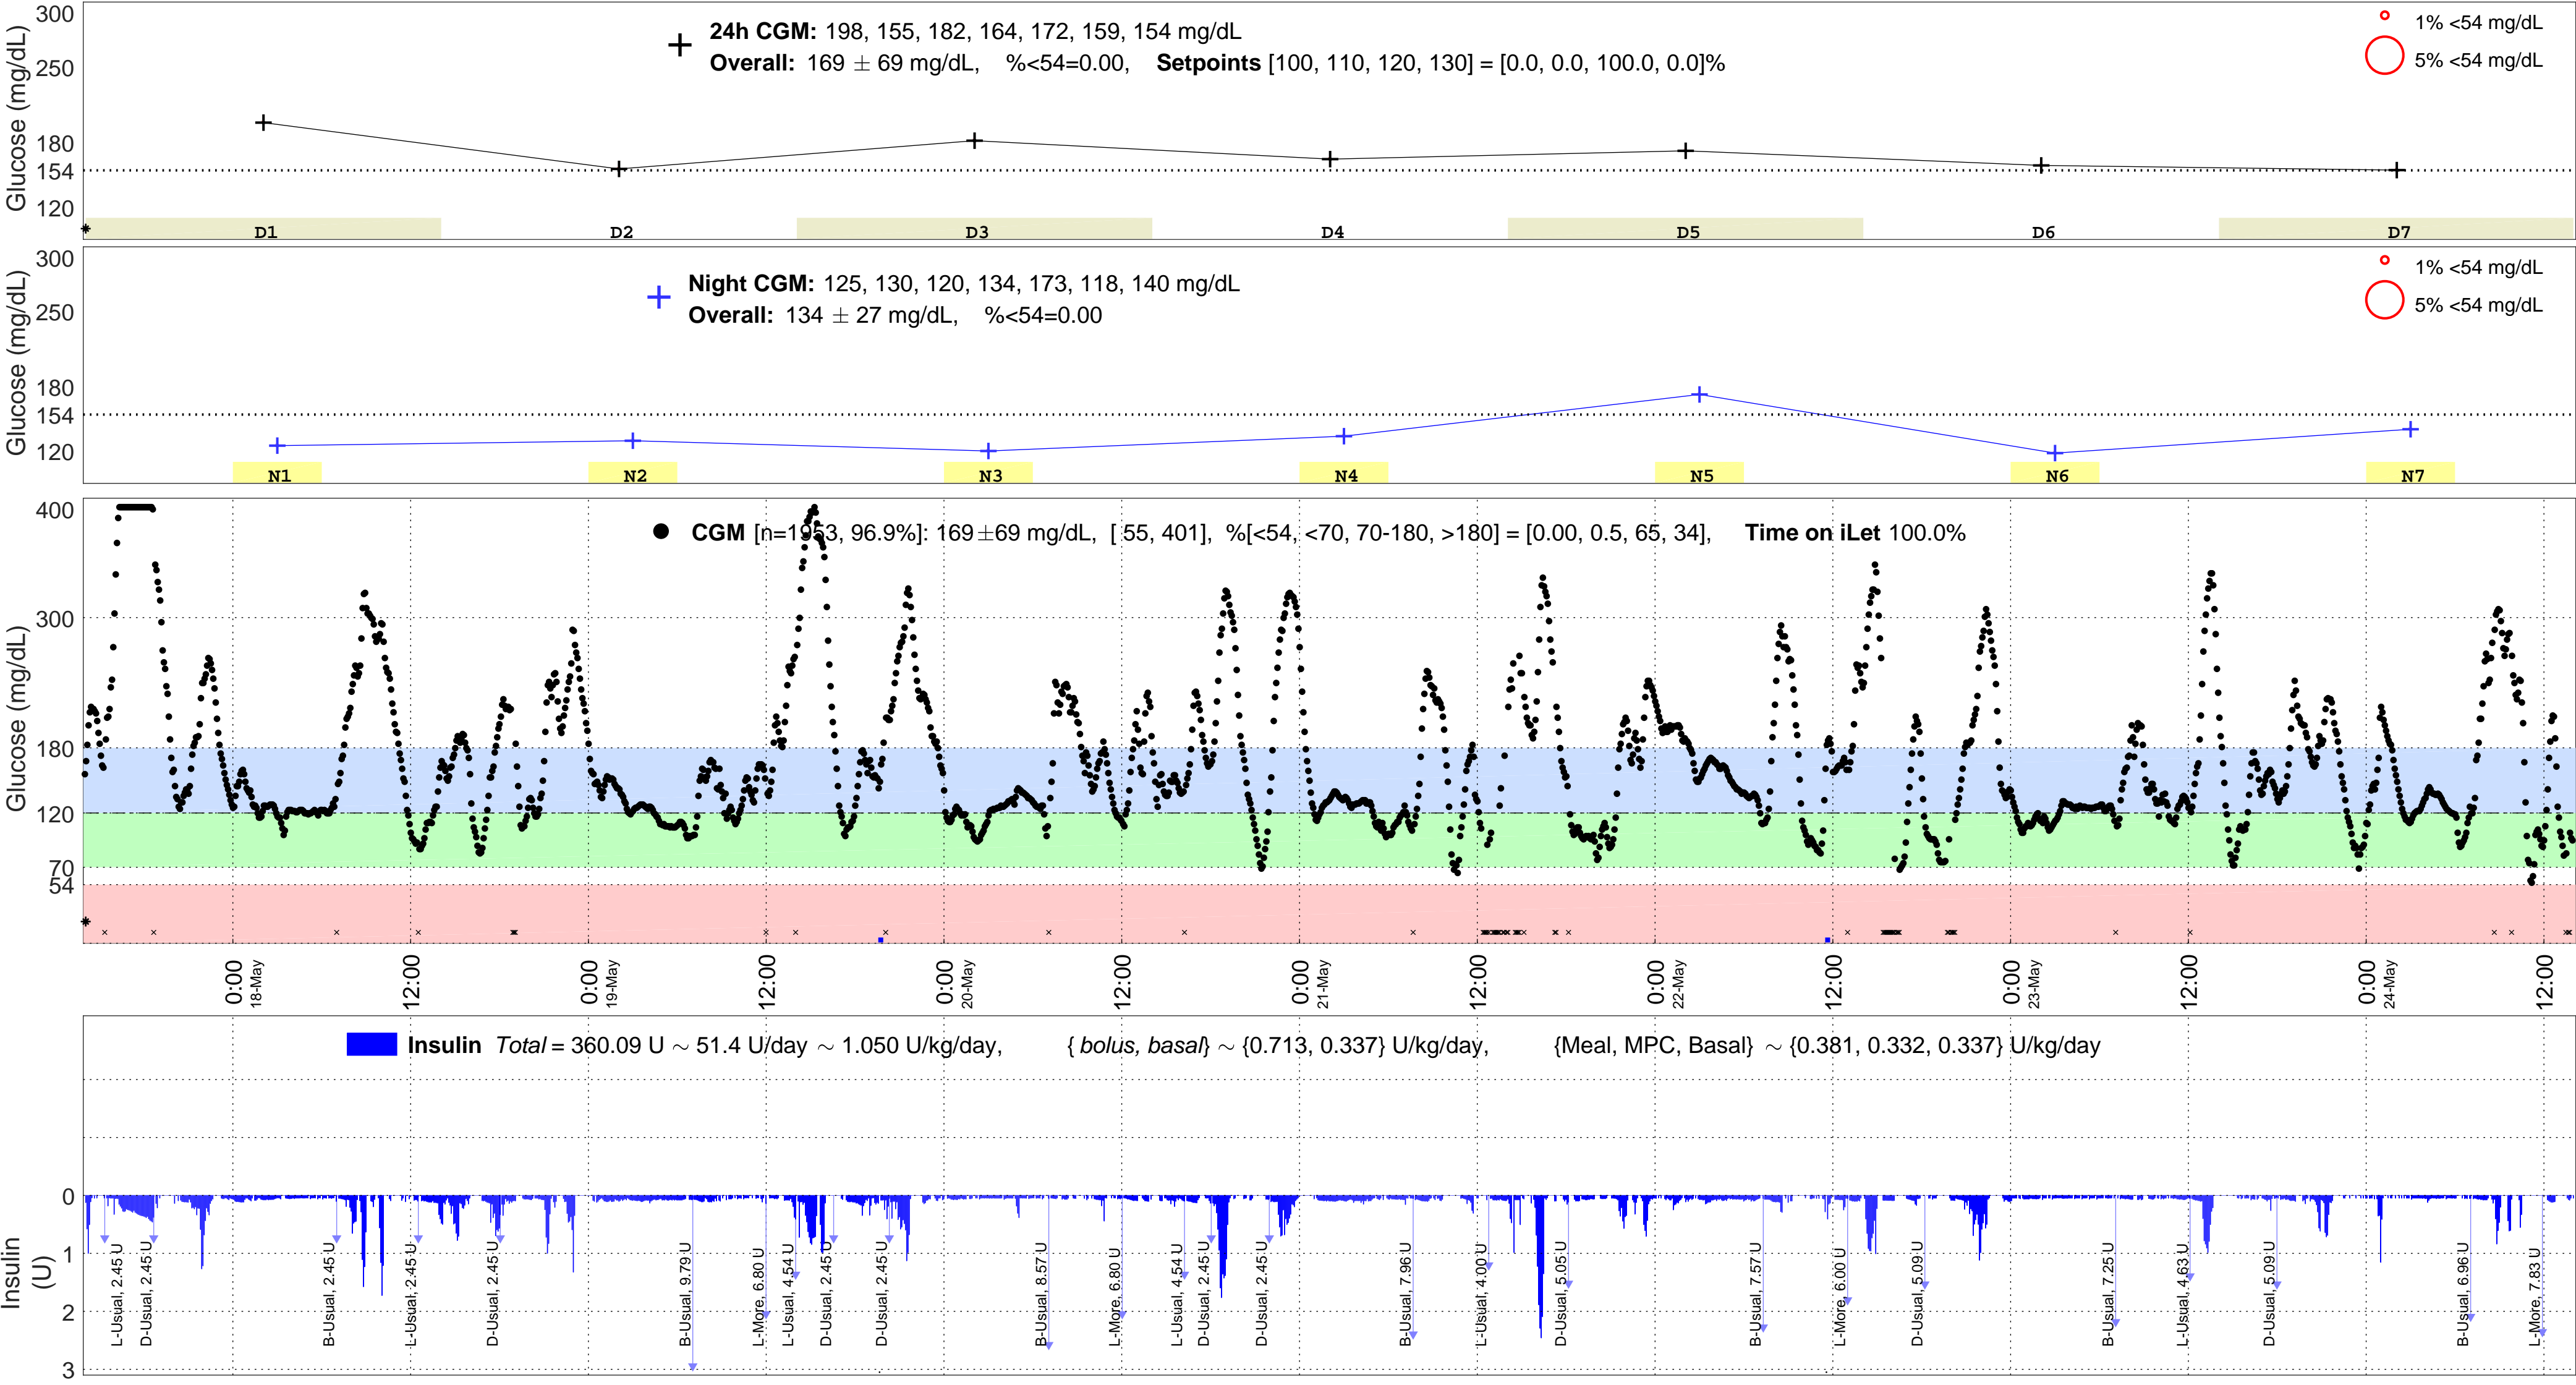

Bionic Pancreas (ID: CF-MGH-09-IP37\_Wk2, BM=49 kg), Insulin Only, 24-May-2022 14:04 to 31-May-2022 13:24[+7.0]

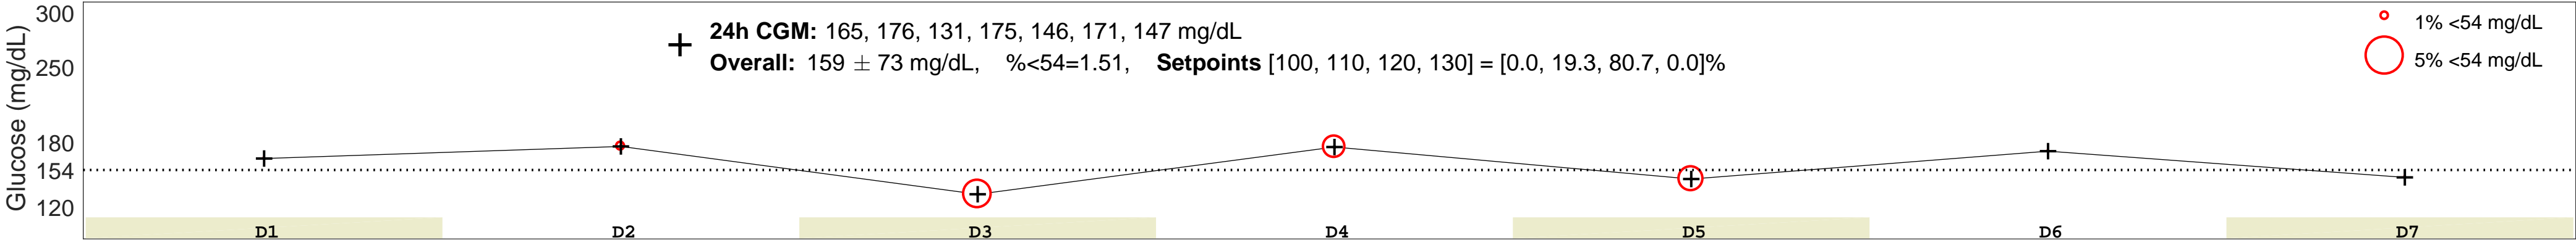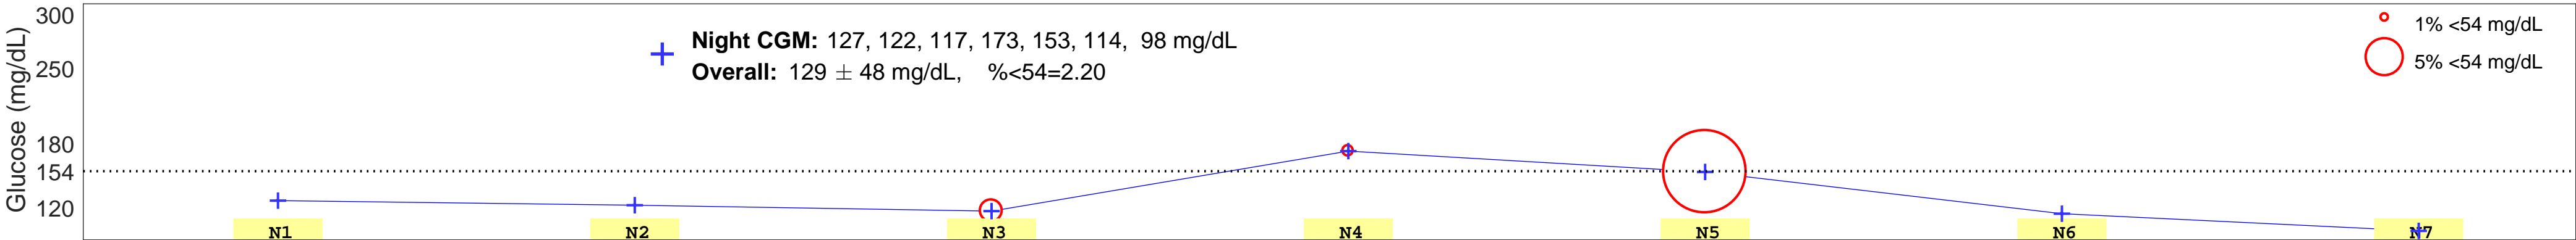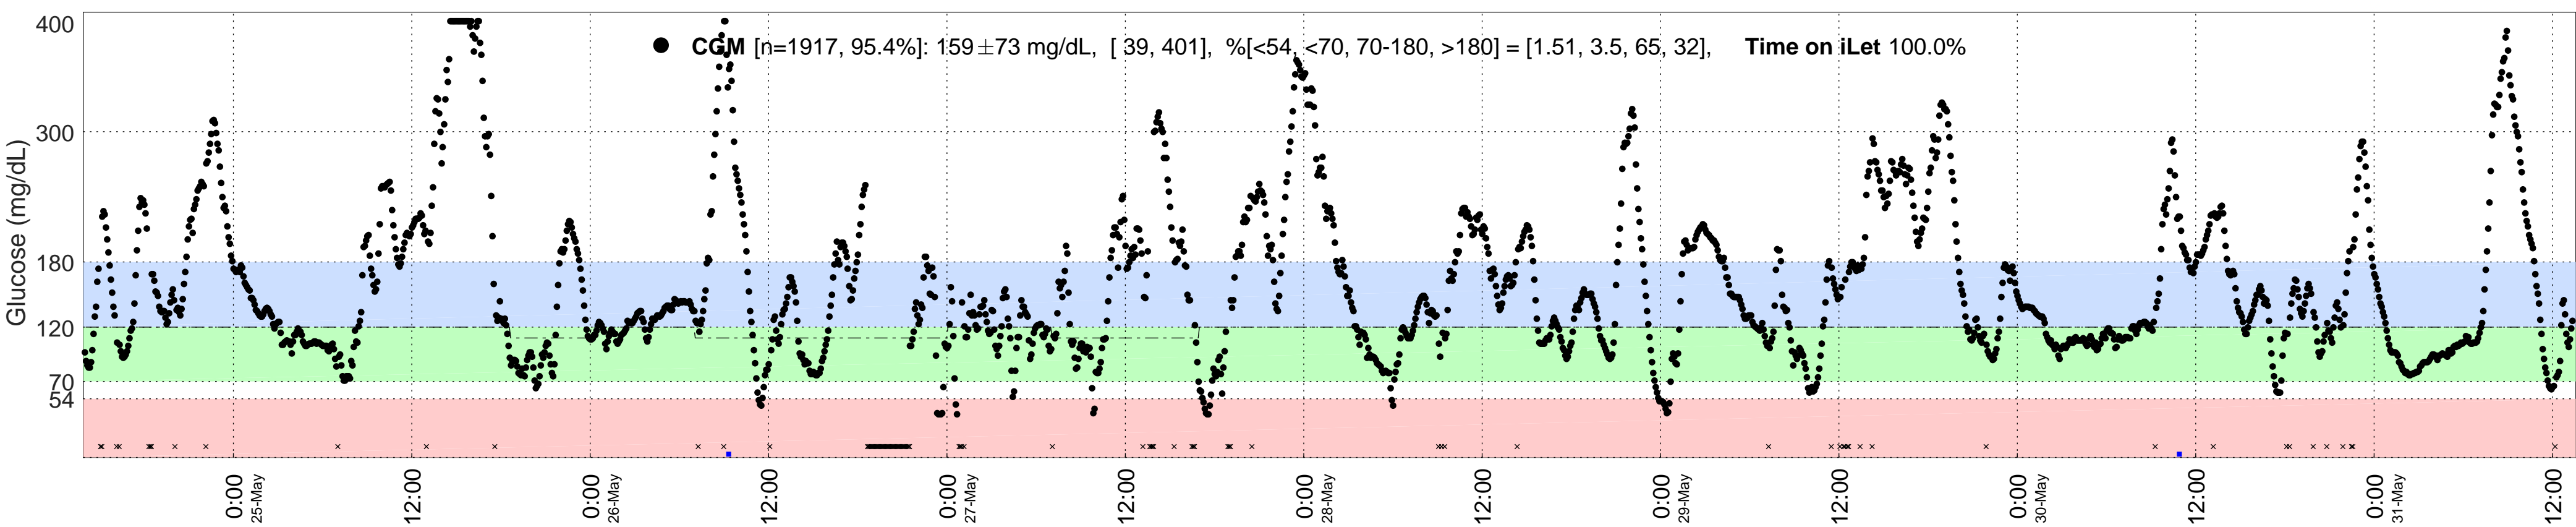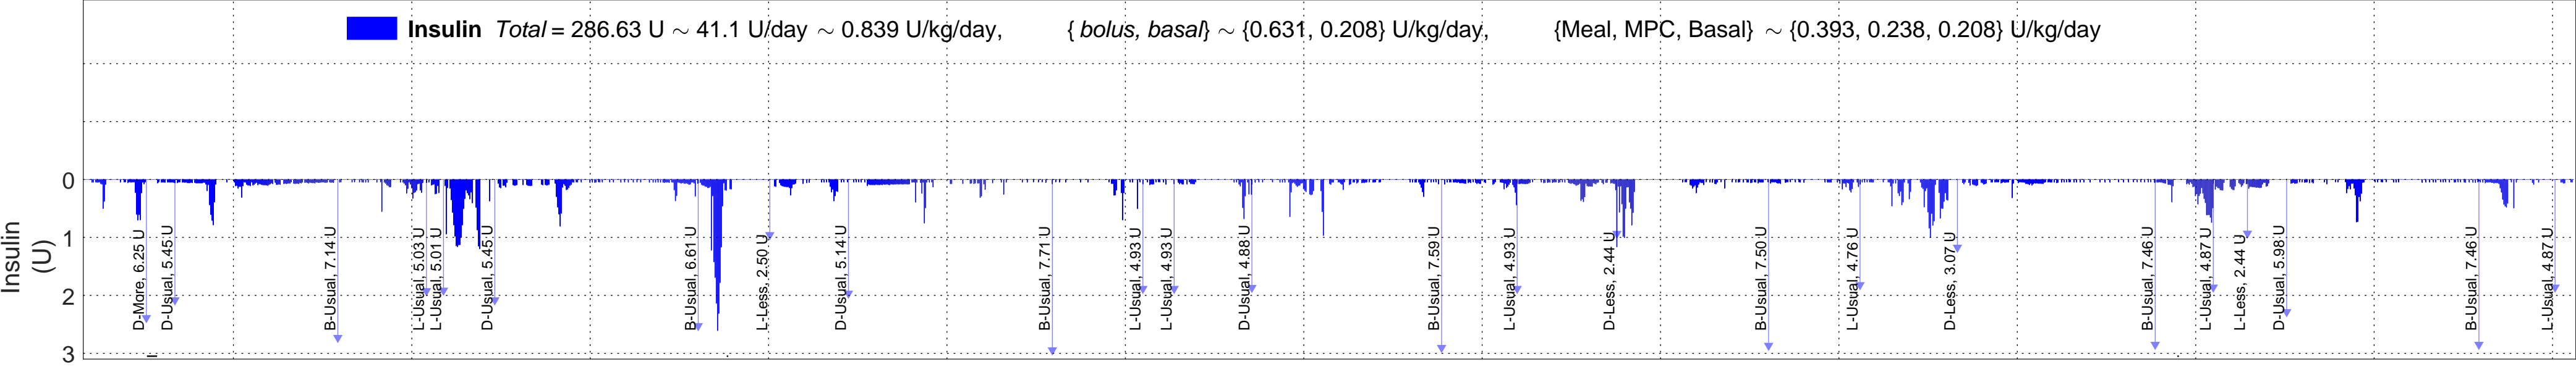

Control (UC-CF-MGH-09\_Wk1), 31-May-2022 13:26 to 07-Jun-2022 13:22[+7.0]

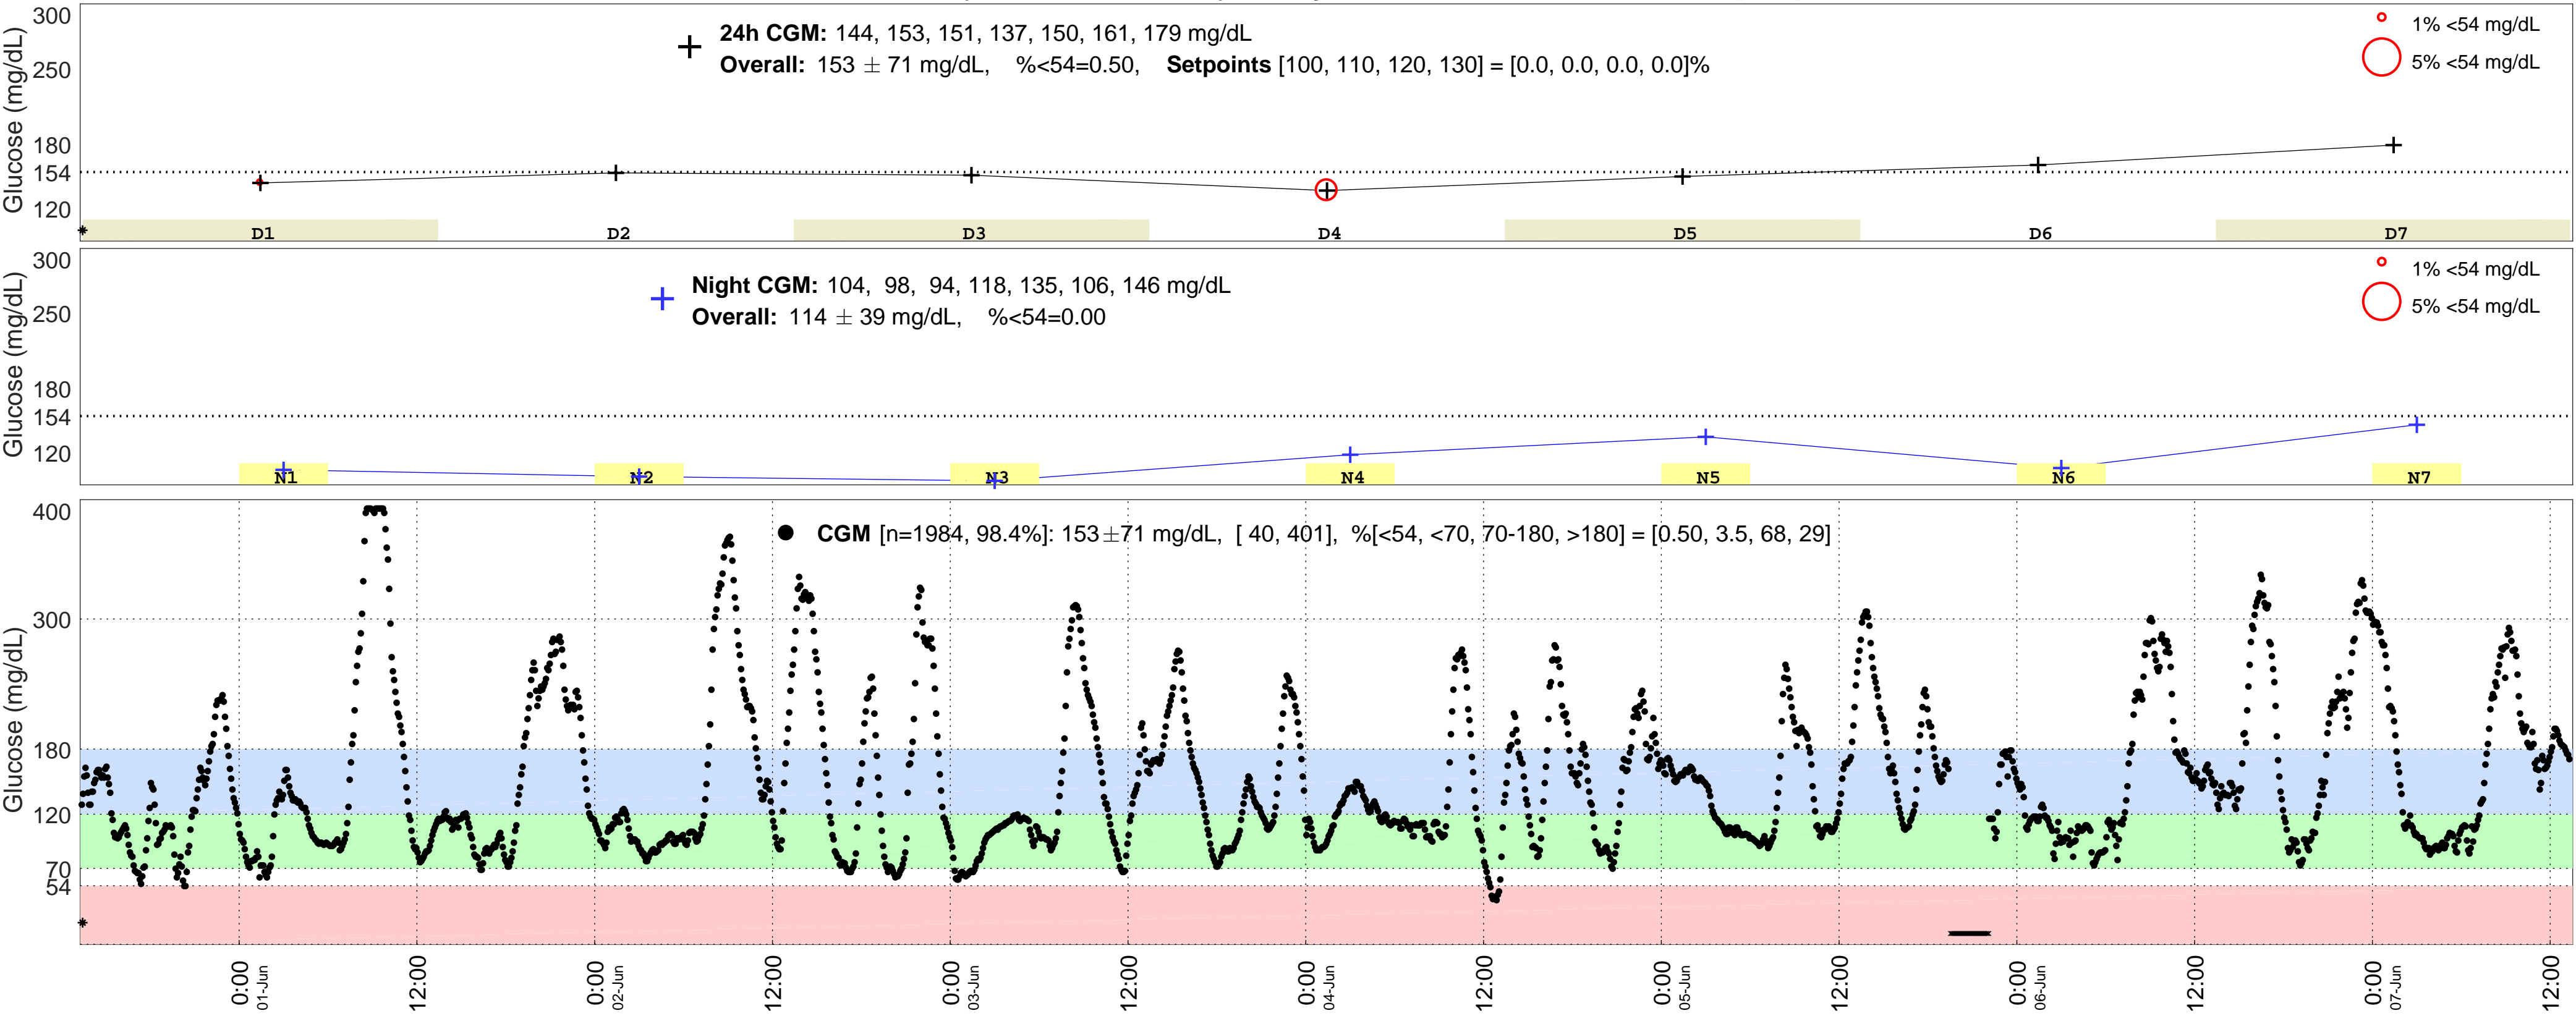

Control (UC-CF-MGH-09\_Wk2), 07-Jun-2022 13:27 to 14-Jun-2022 09:12[+6.8]

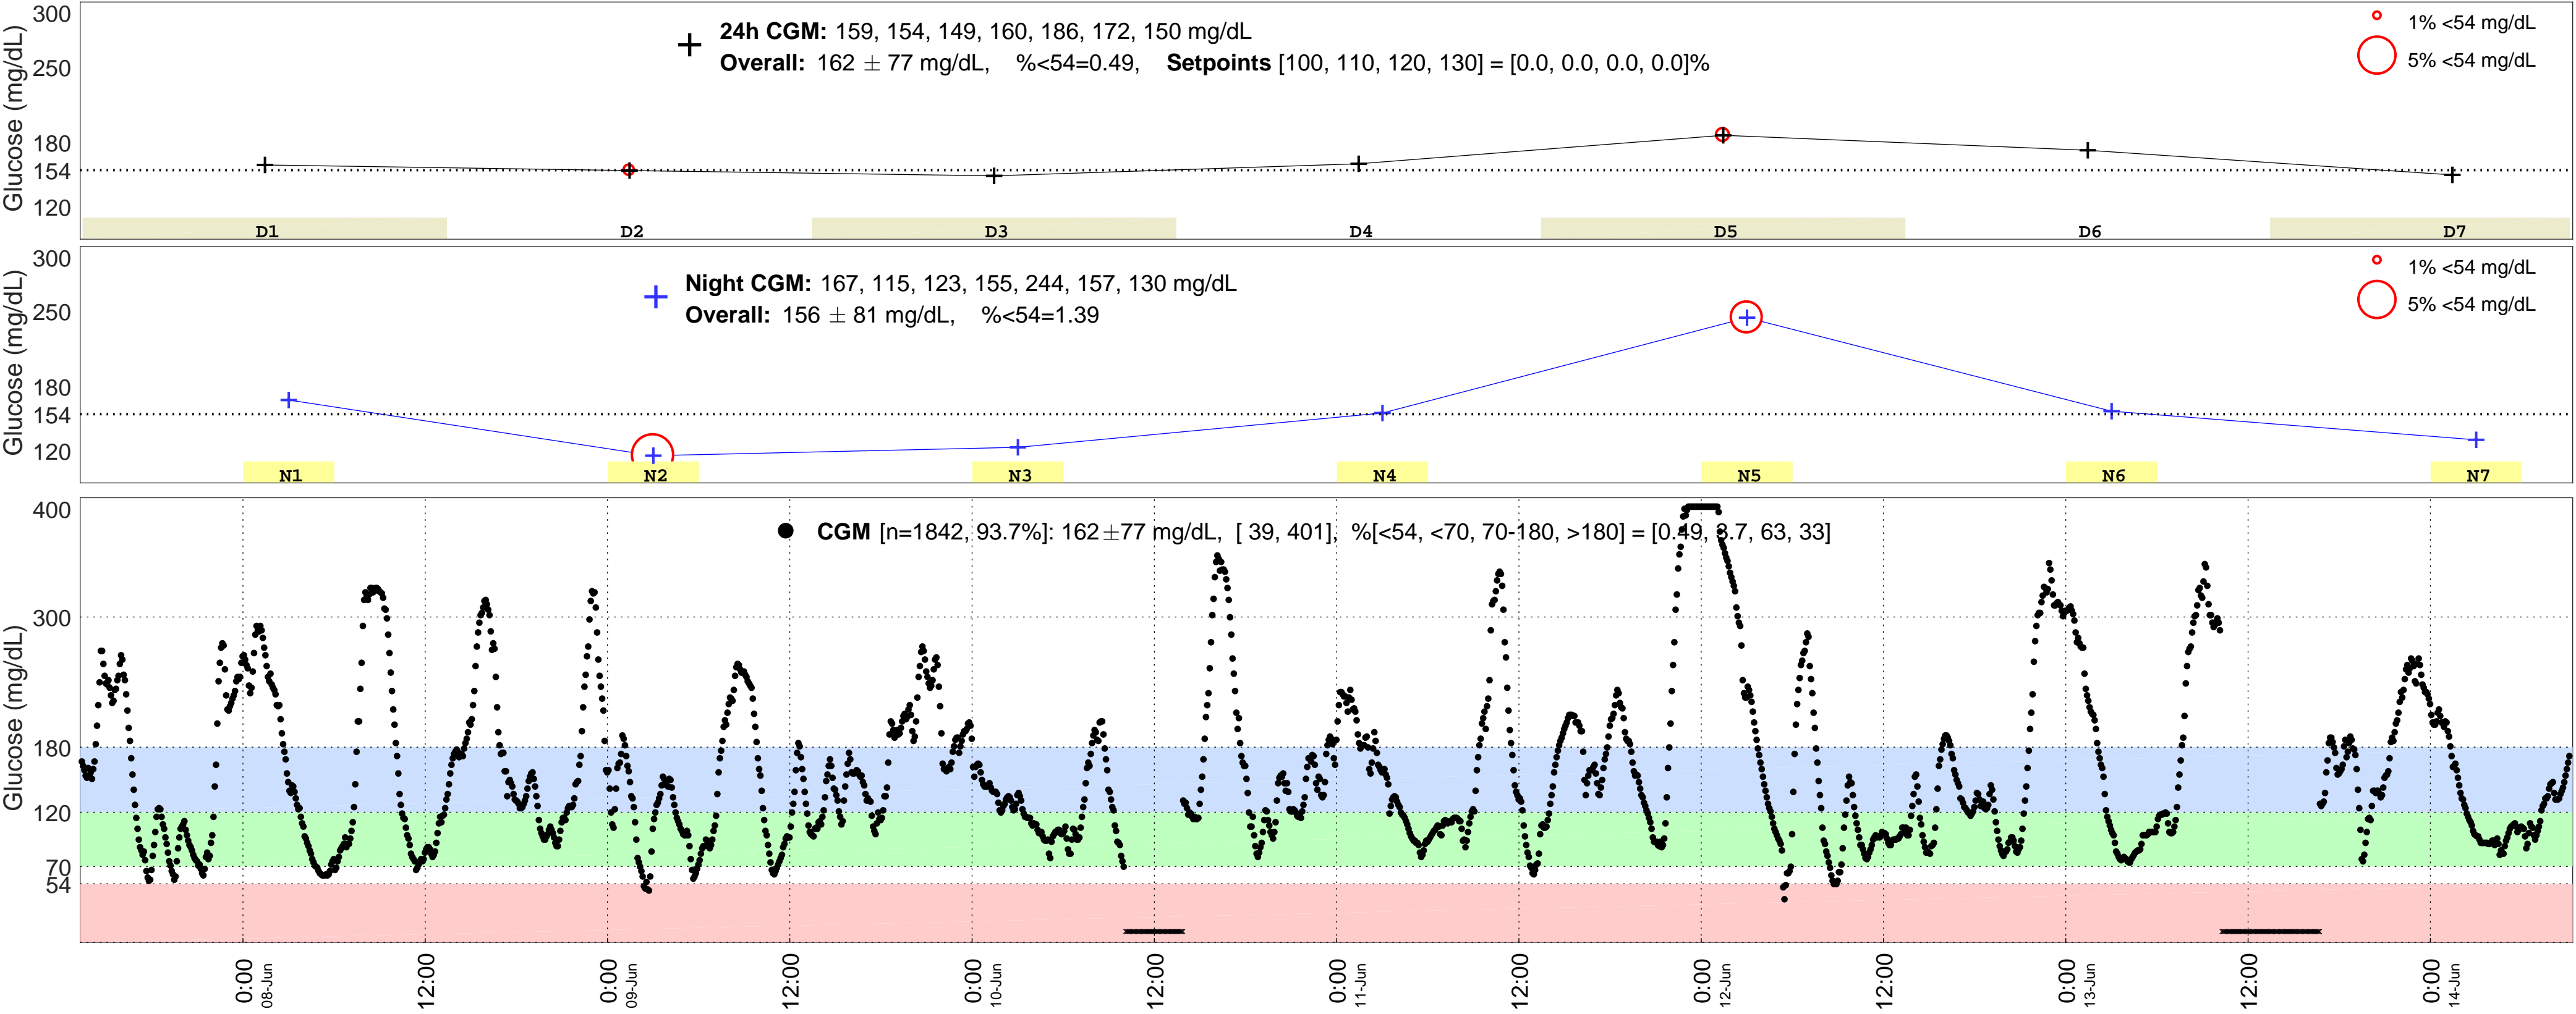



Bionic Pancreas (ID: CF-MGH-10-IP65\_Wk1, BM=64 kg), Insulin Only, 15-Sep-2021 13:45 to 22-Sep-2021 13:40[+7.0]

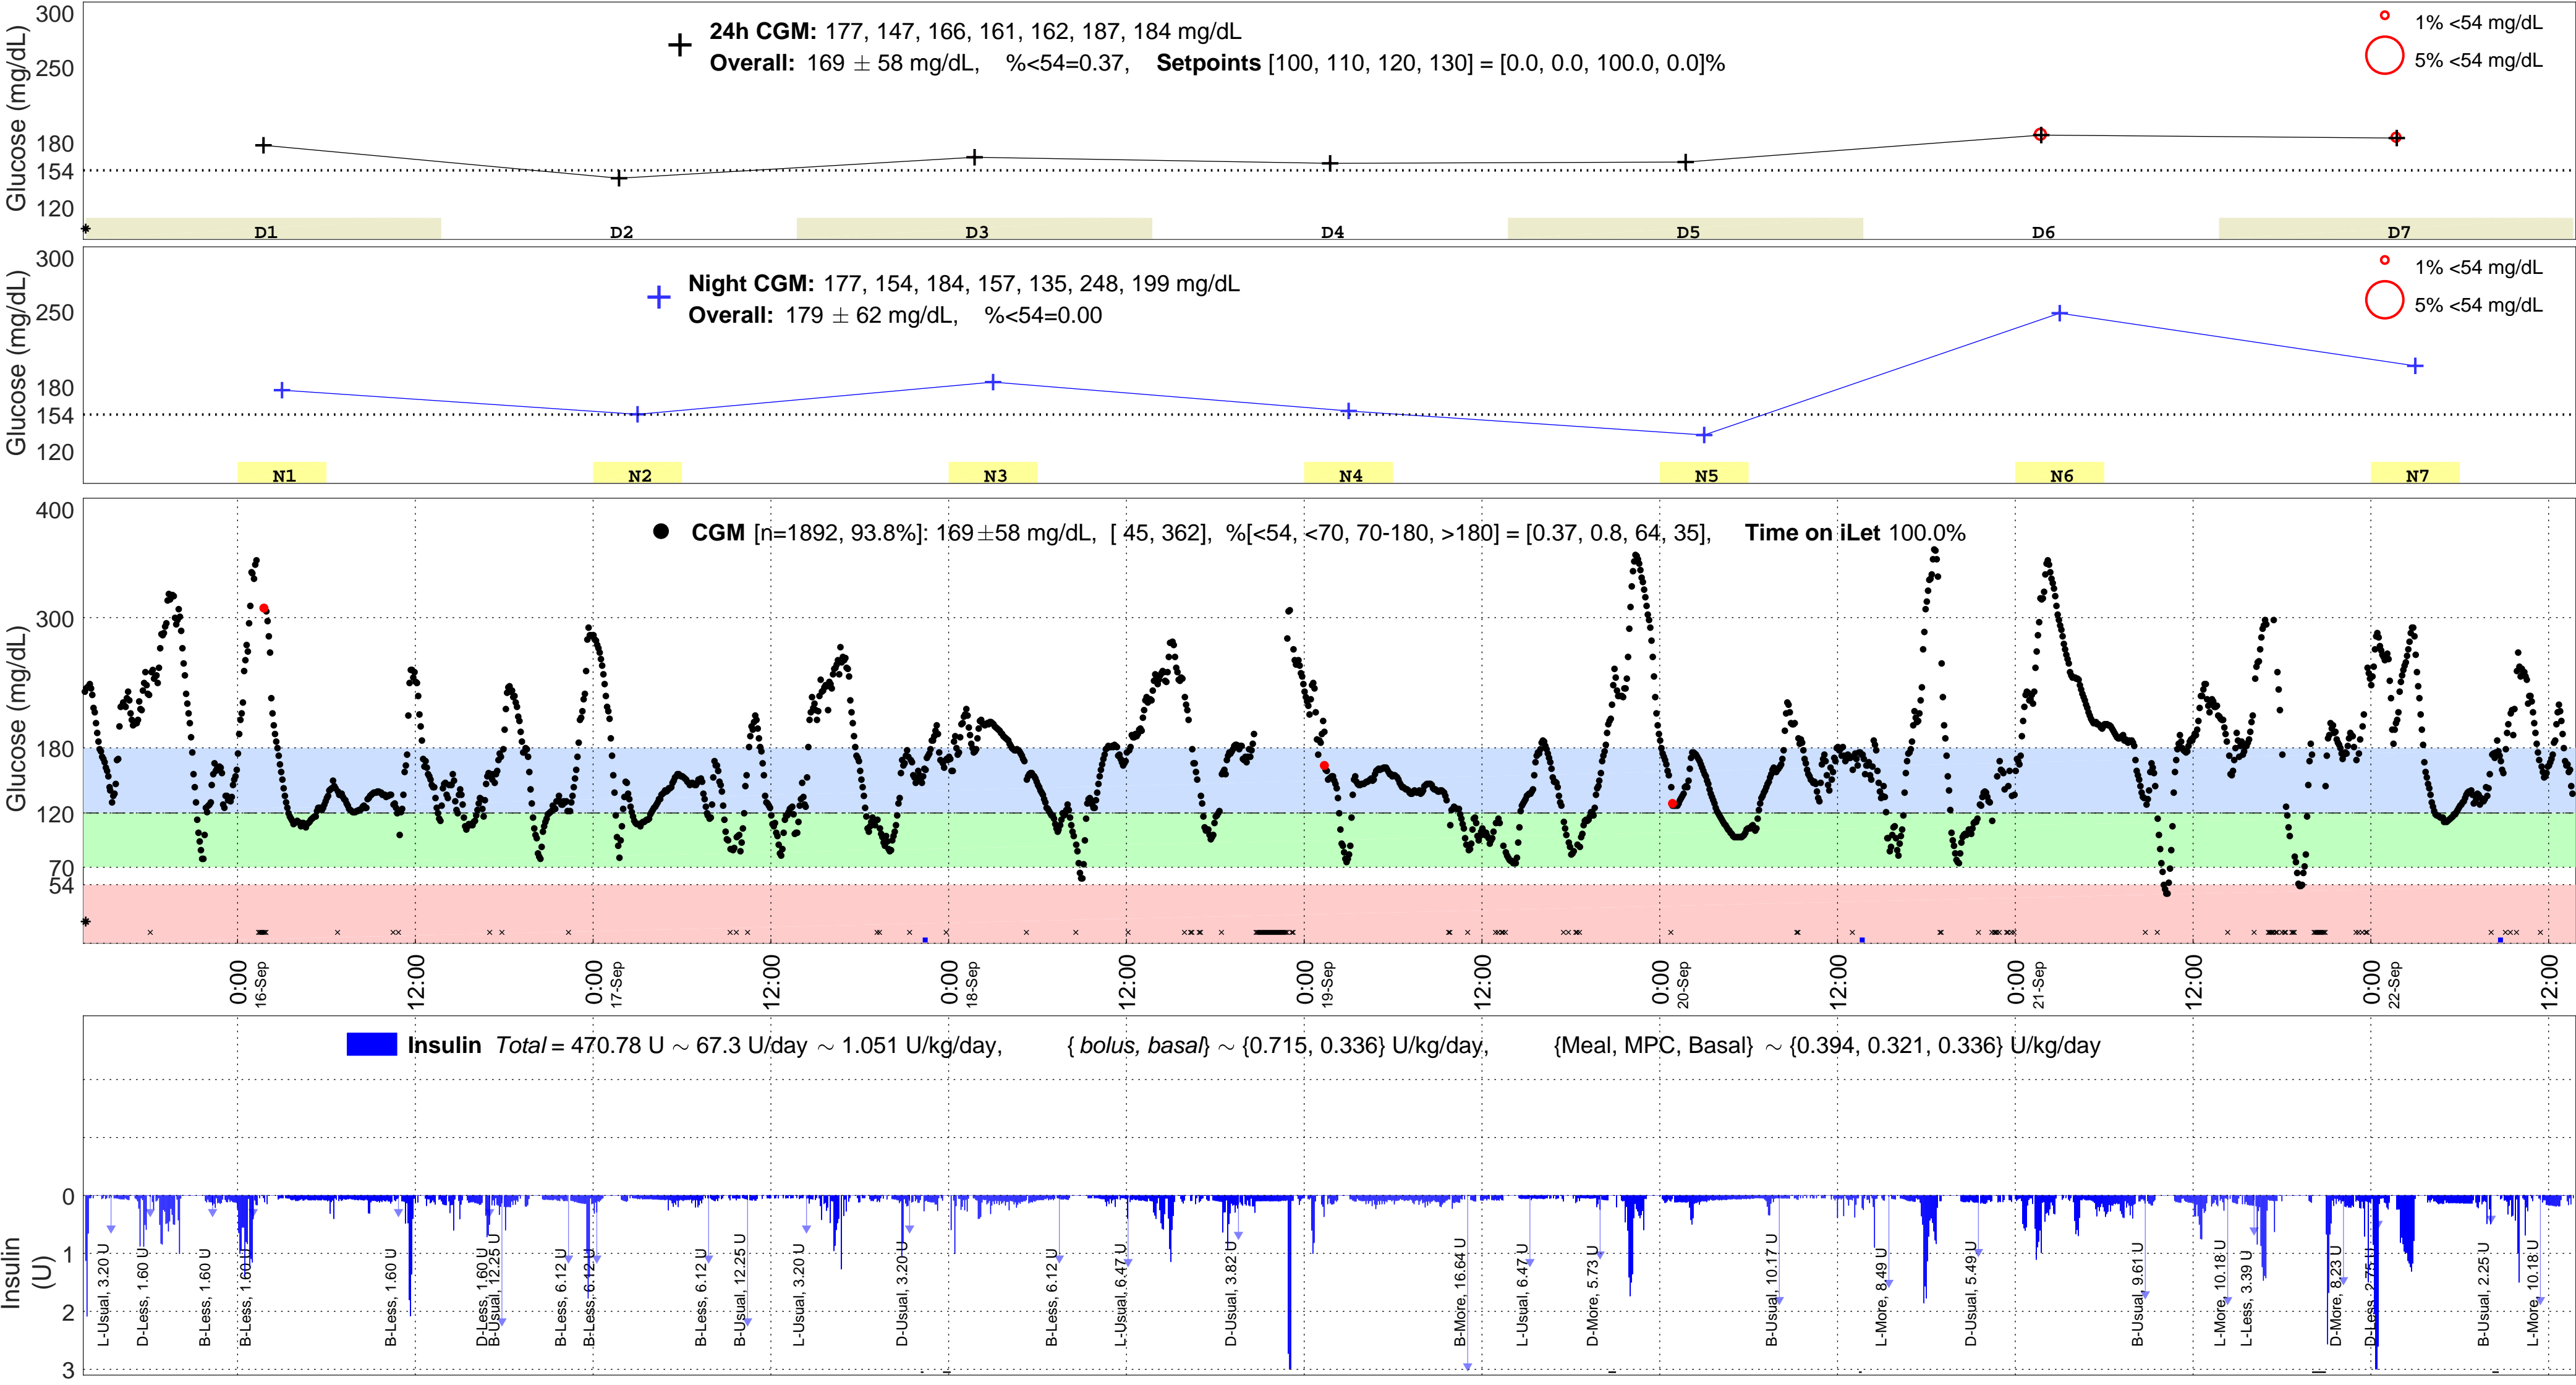



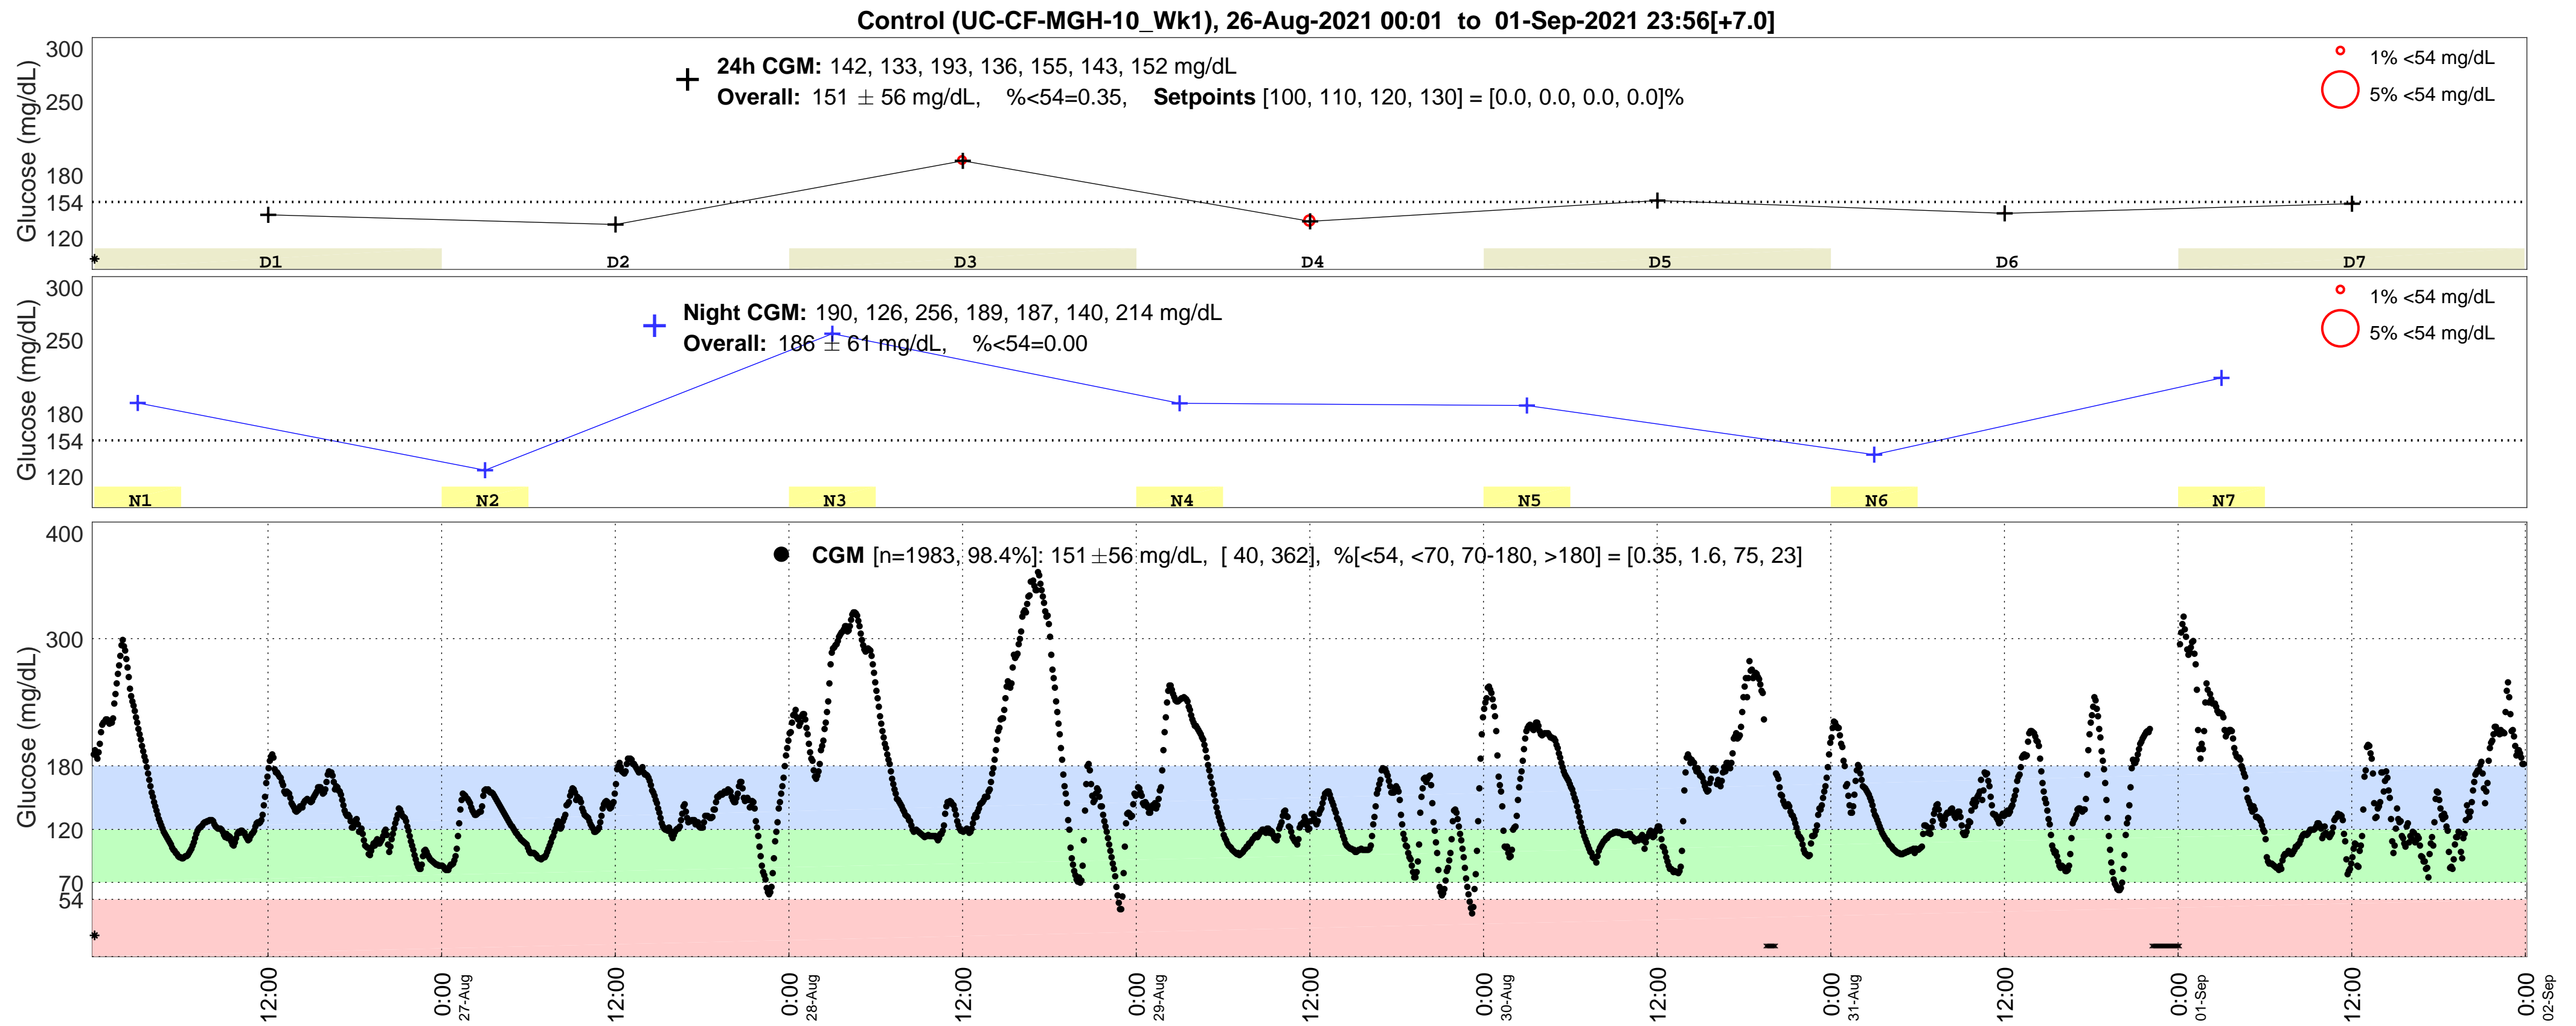

Control (UC-CF-MGH-10\_Wk2), 02-Sep-2021 00:01 to 09-Sep-2021 23:56[+8.0]

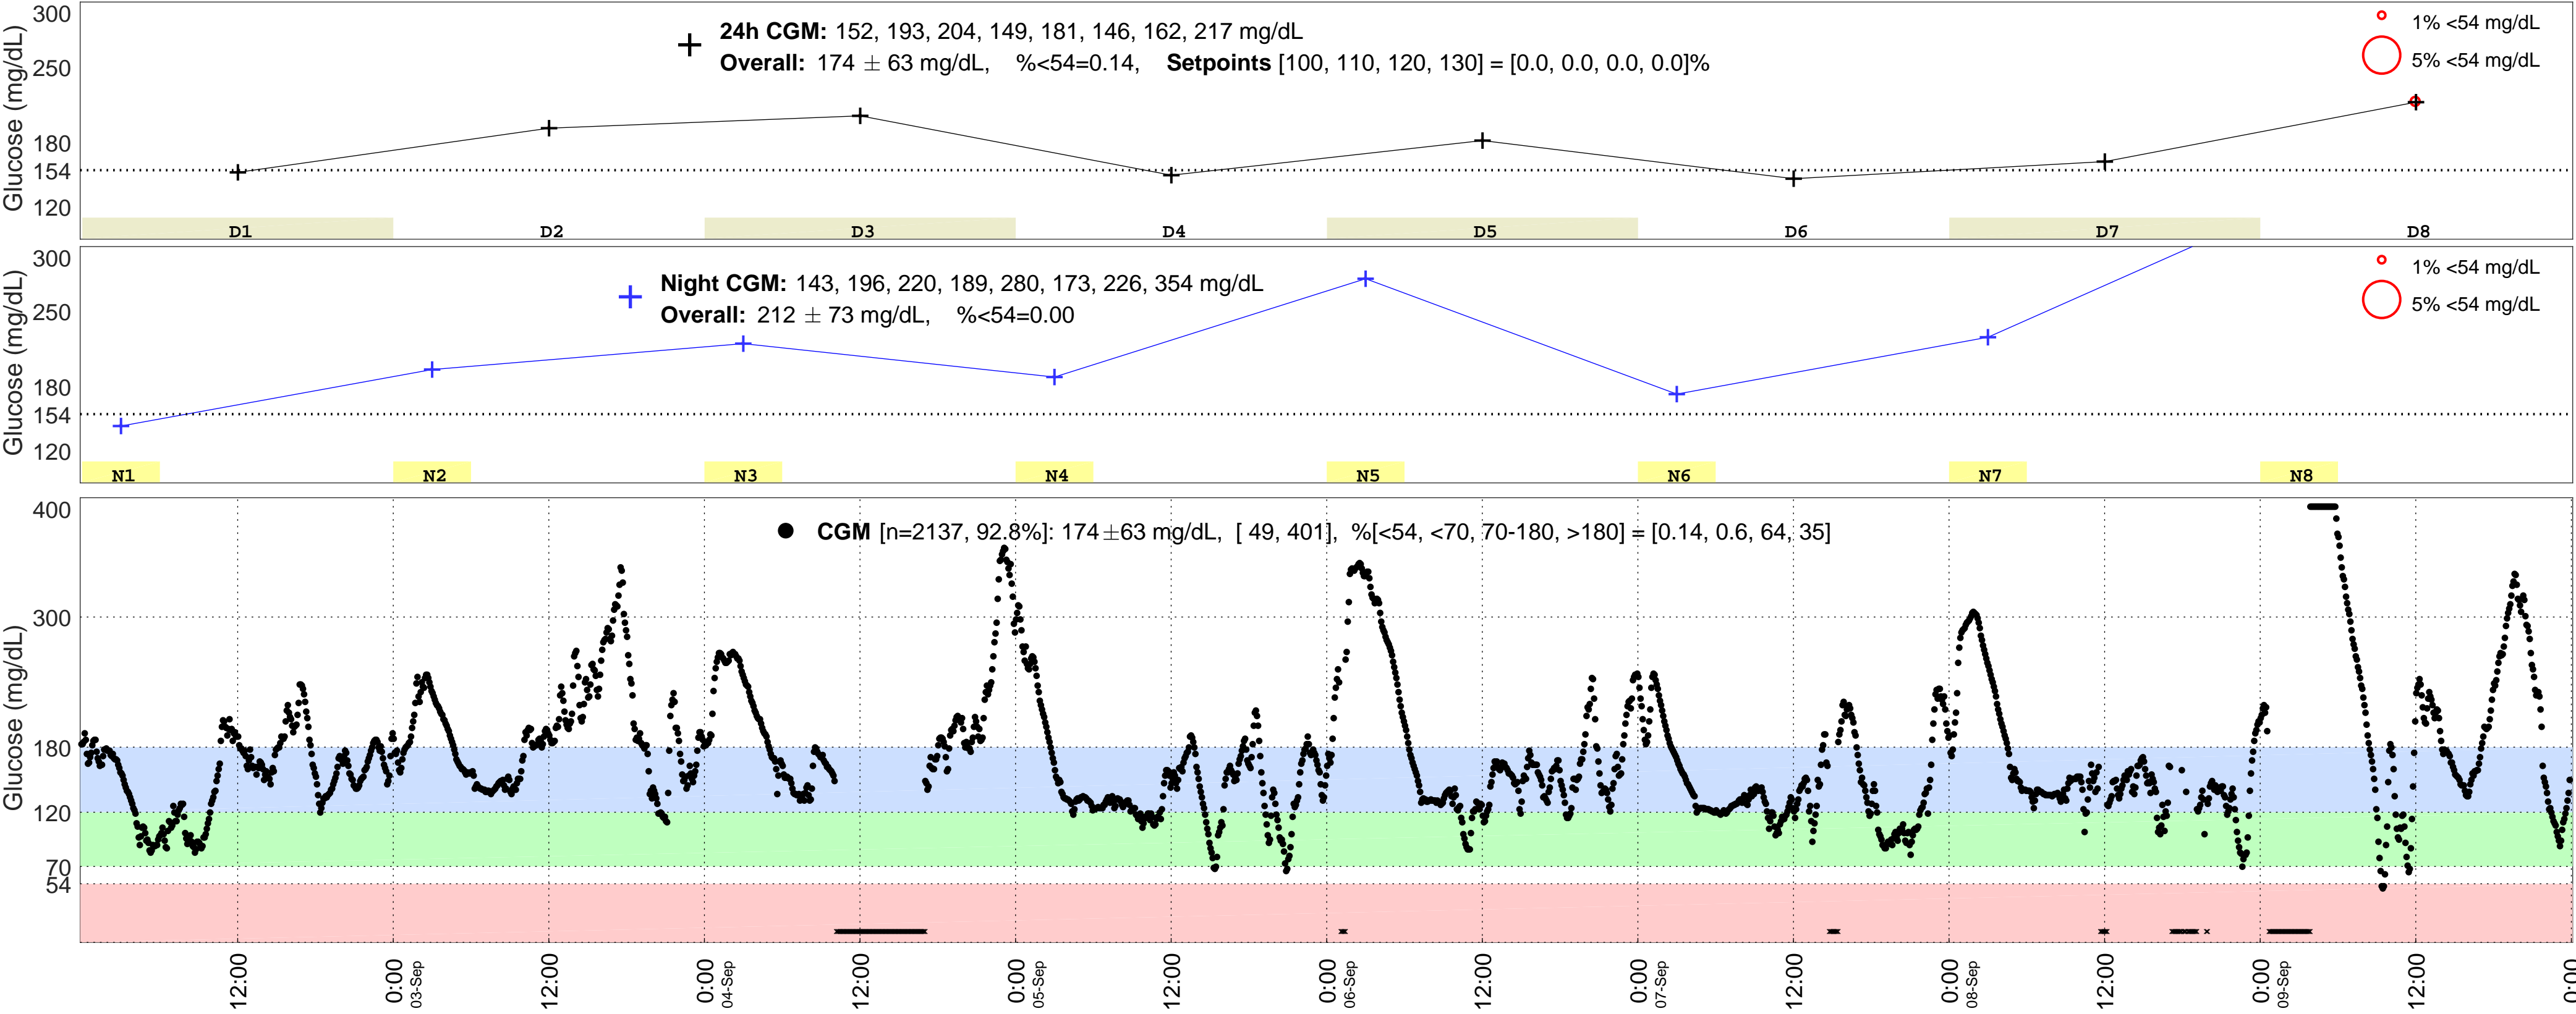

Bionic Pancreas (ID: CF-MGH-11-IM29\_Wk1, BM=52 kg), Insulin Only, 08-Nov-2021 18:58 to 15-Nov-2021 18:53[+7.0]

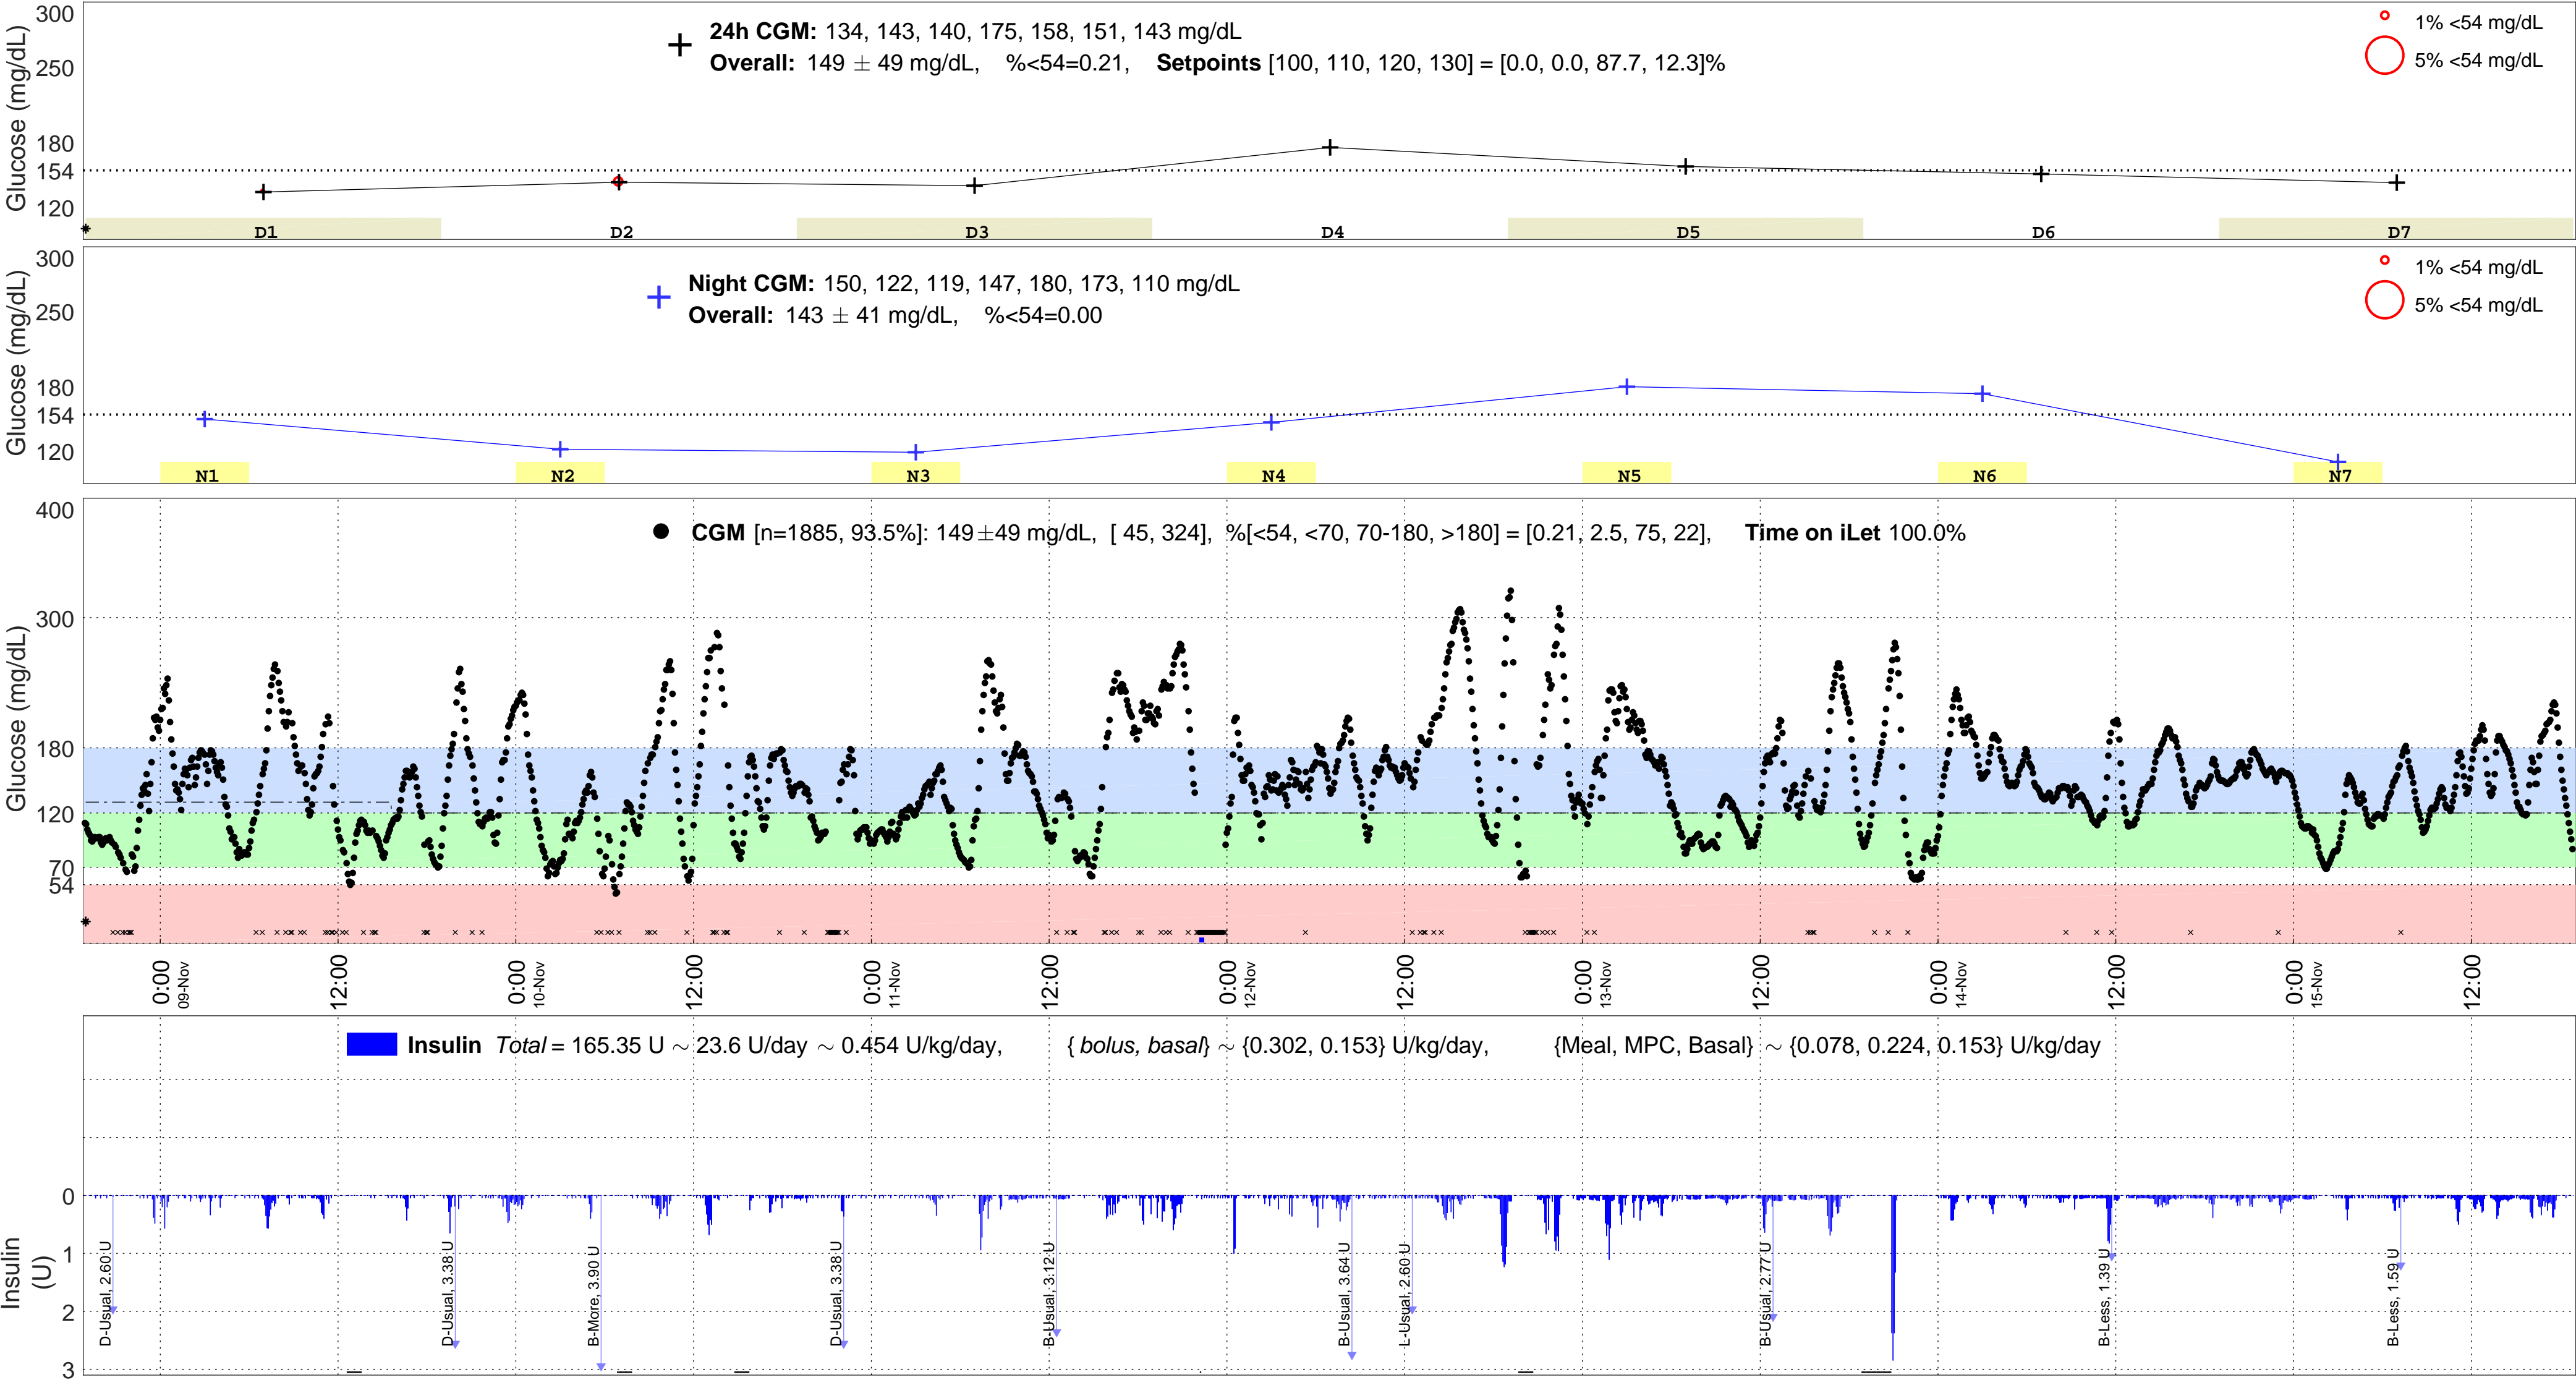



Bionic Pancreas (ID: CF-MGH-11-IM29\_Wk2, BM=52 kg), Insulin Only, 15-Nov-2021 18:56 to 22-Nov-2021 16:43[+6.9]

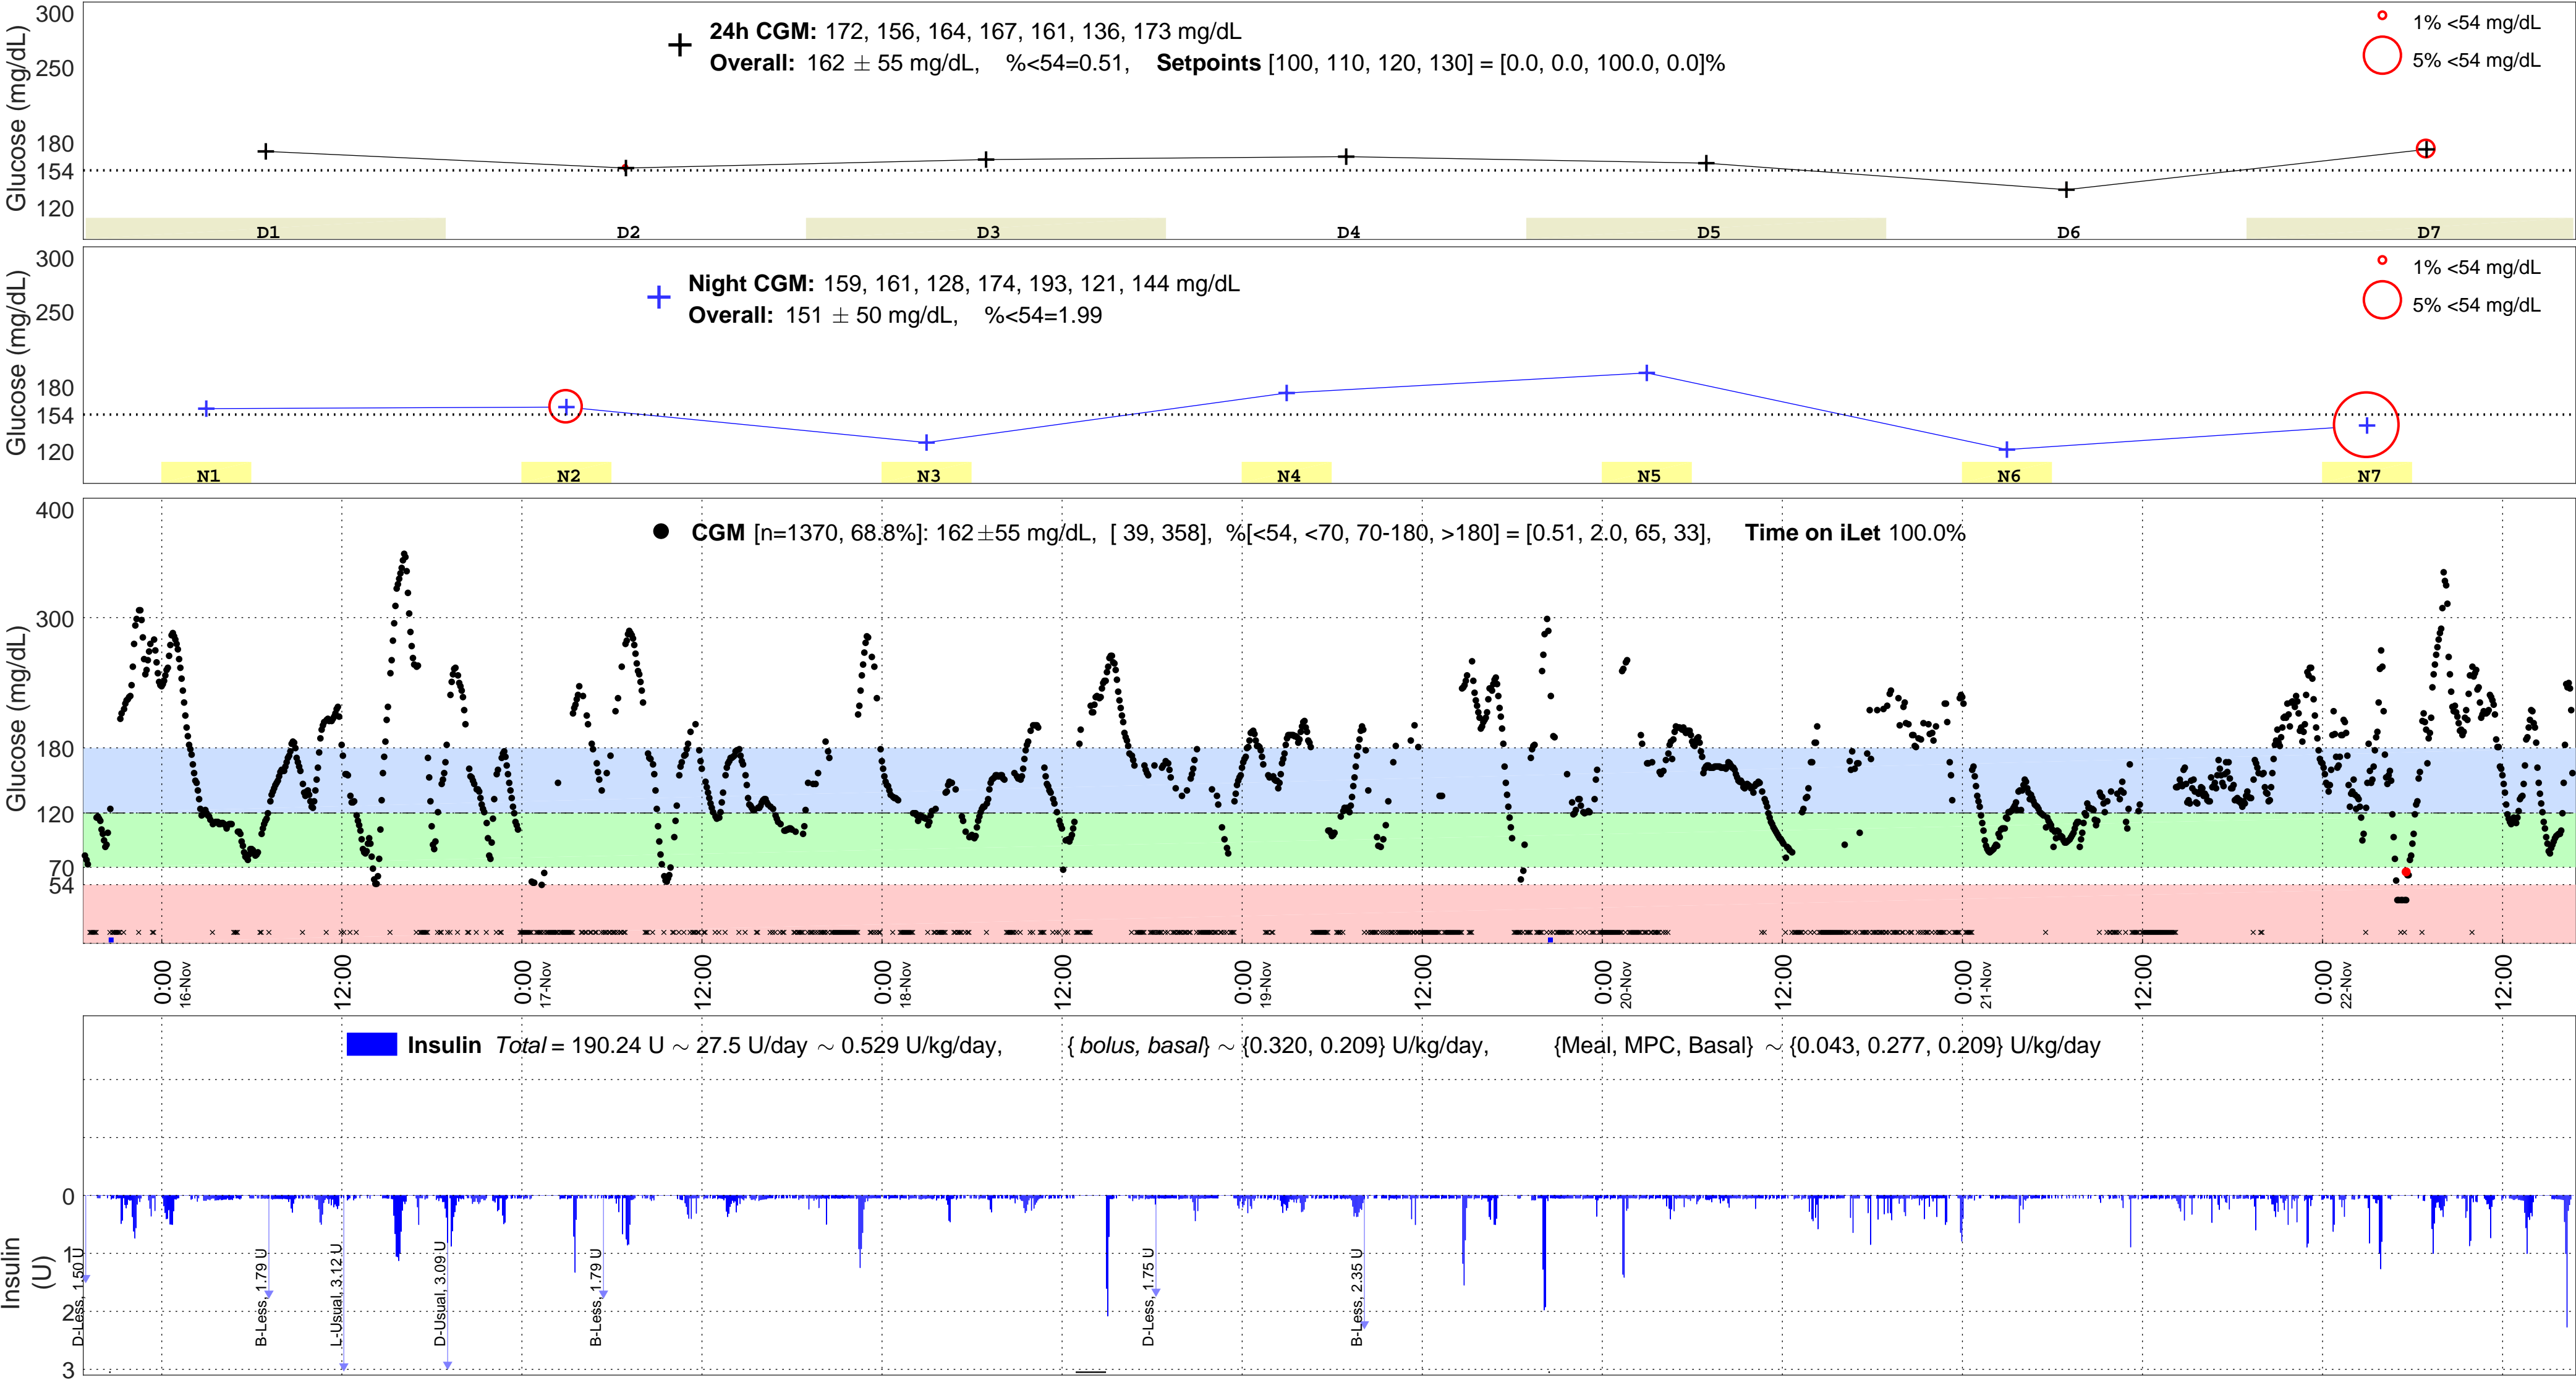

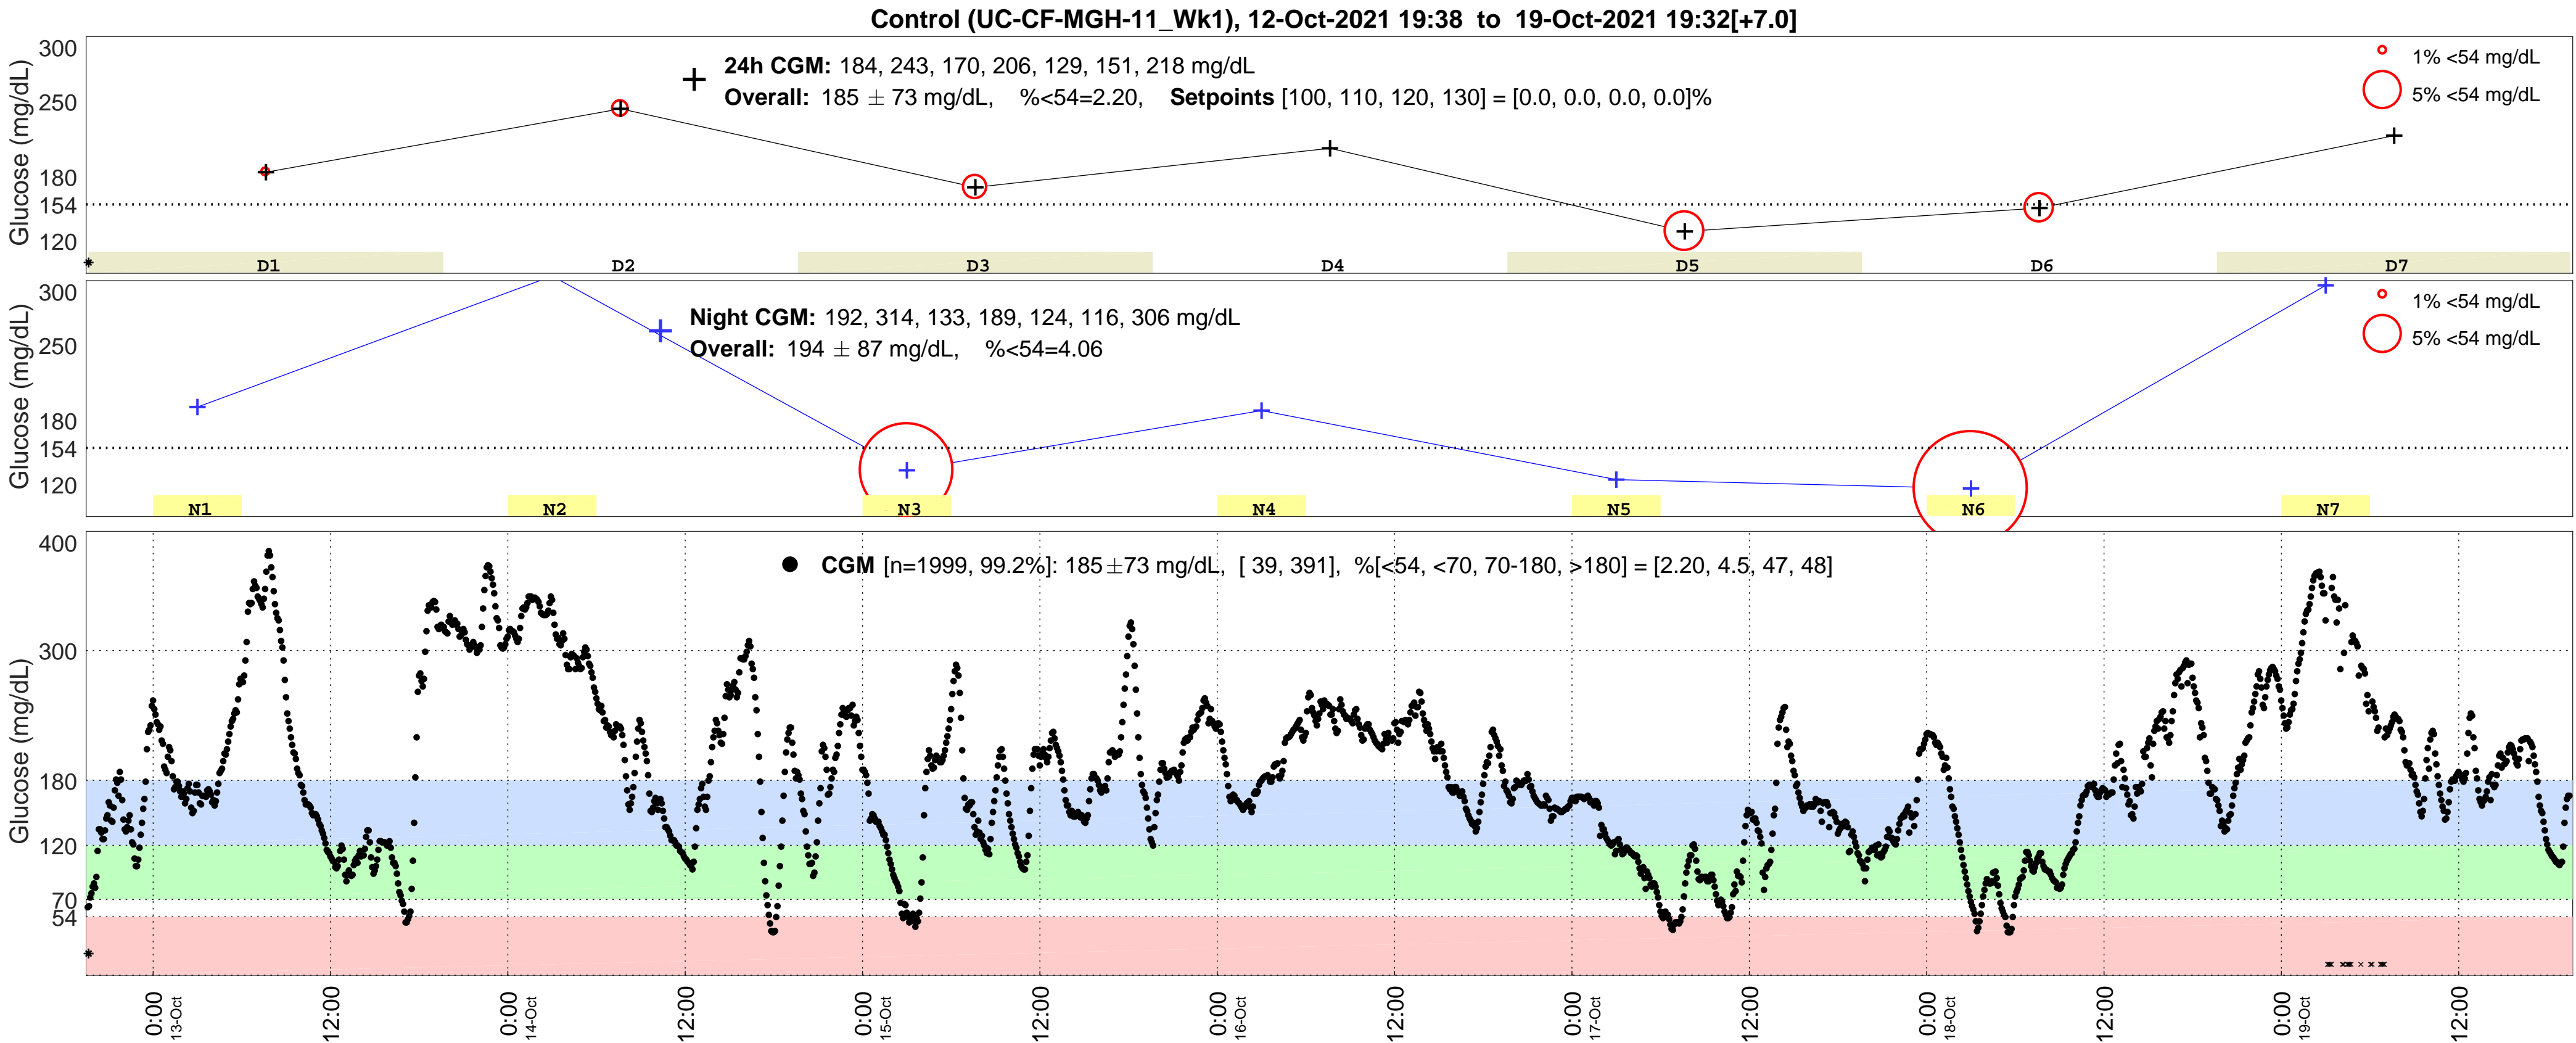

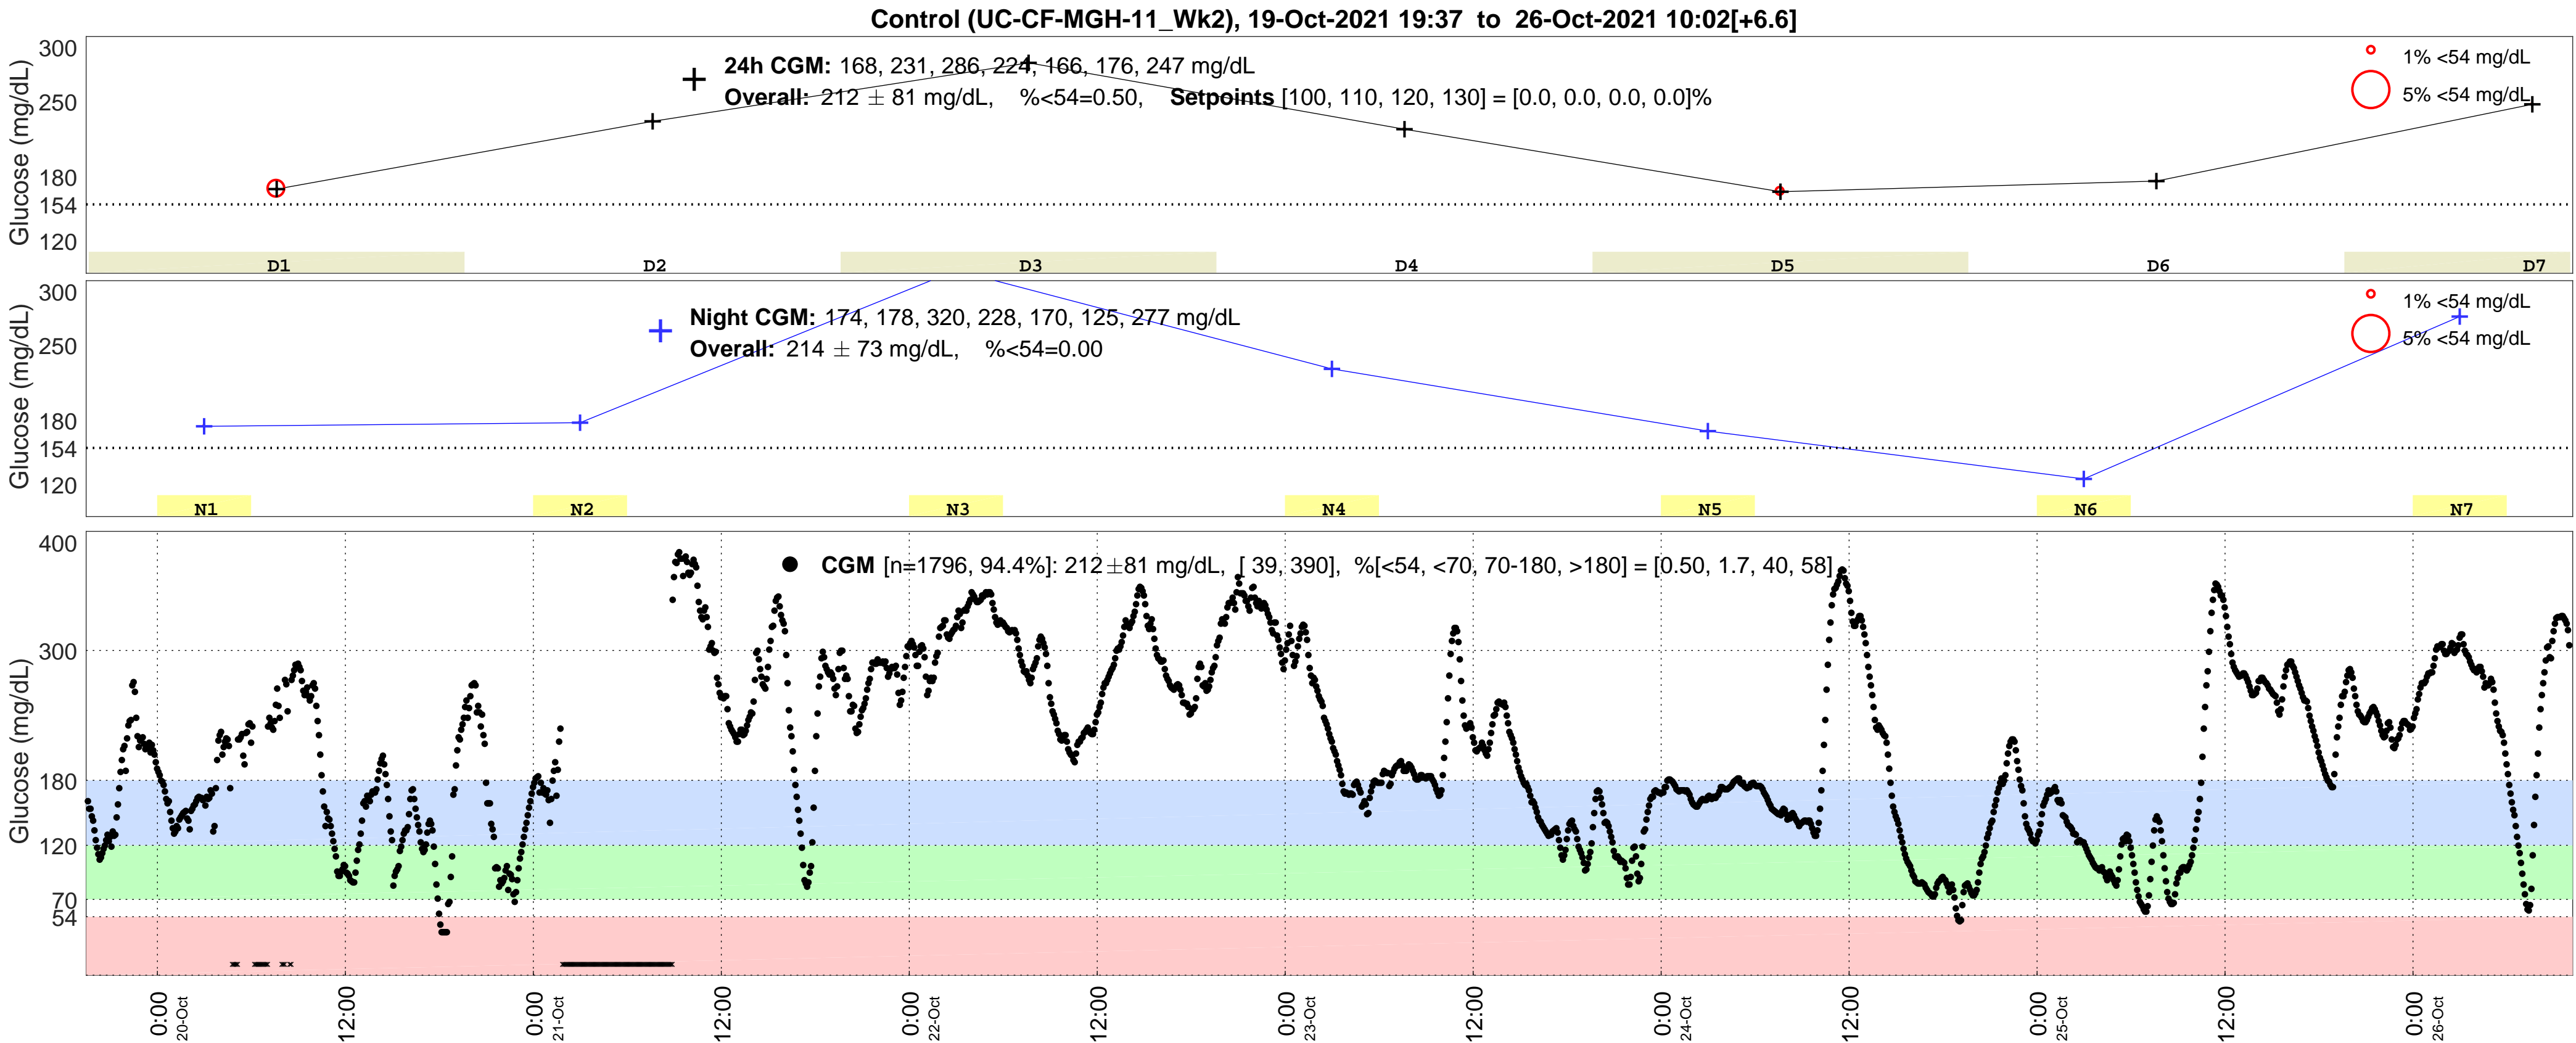

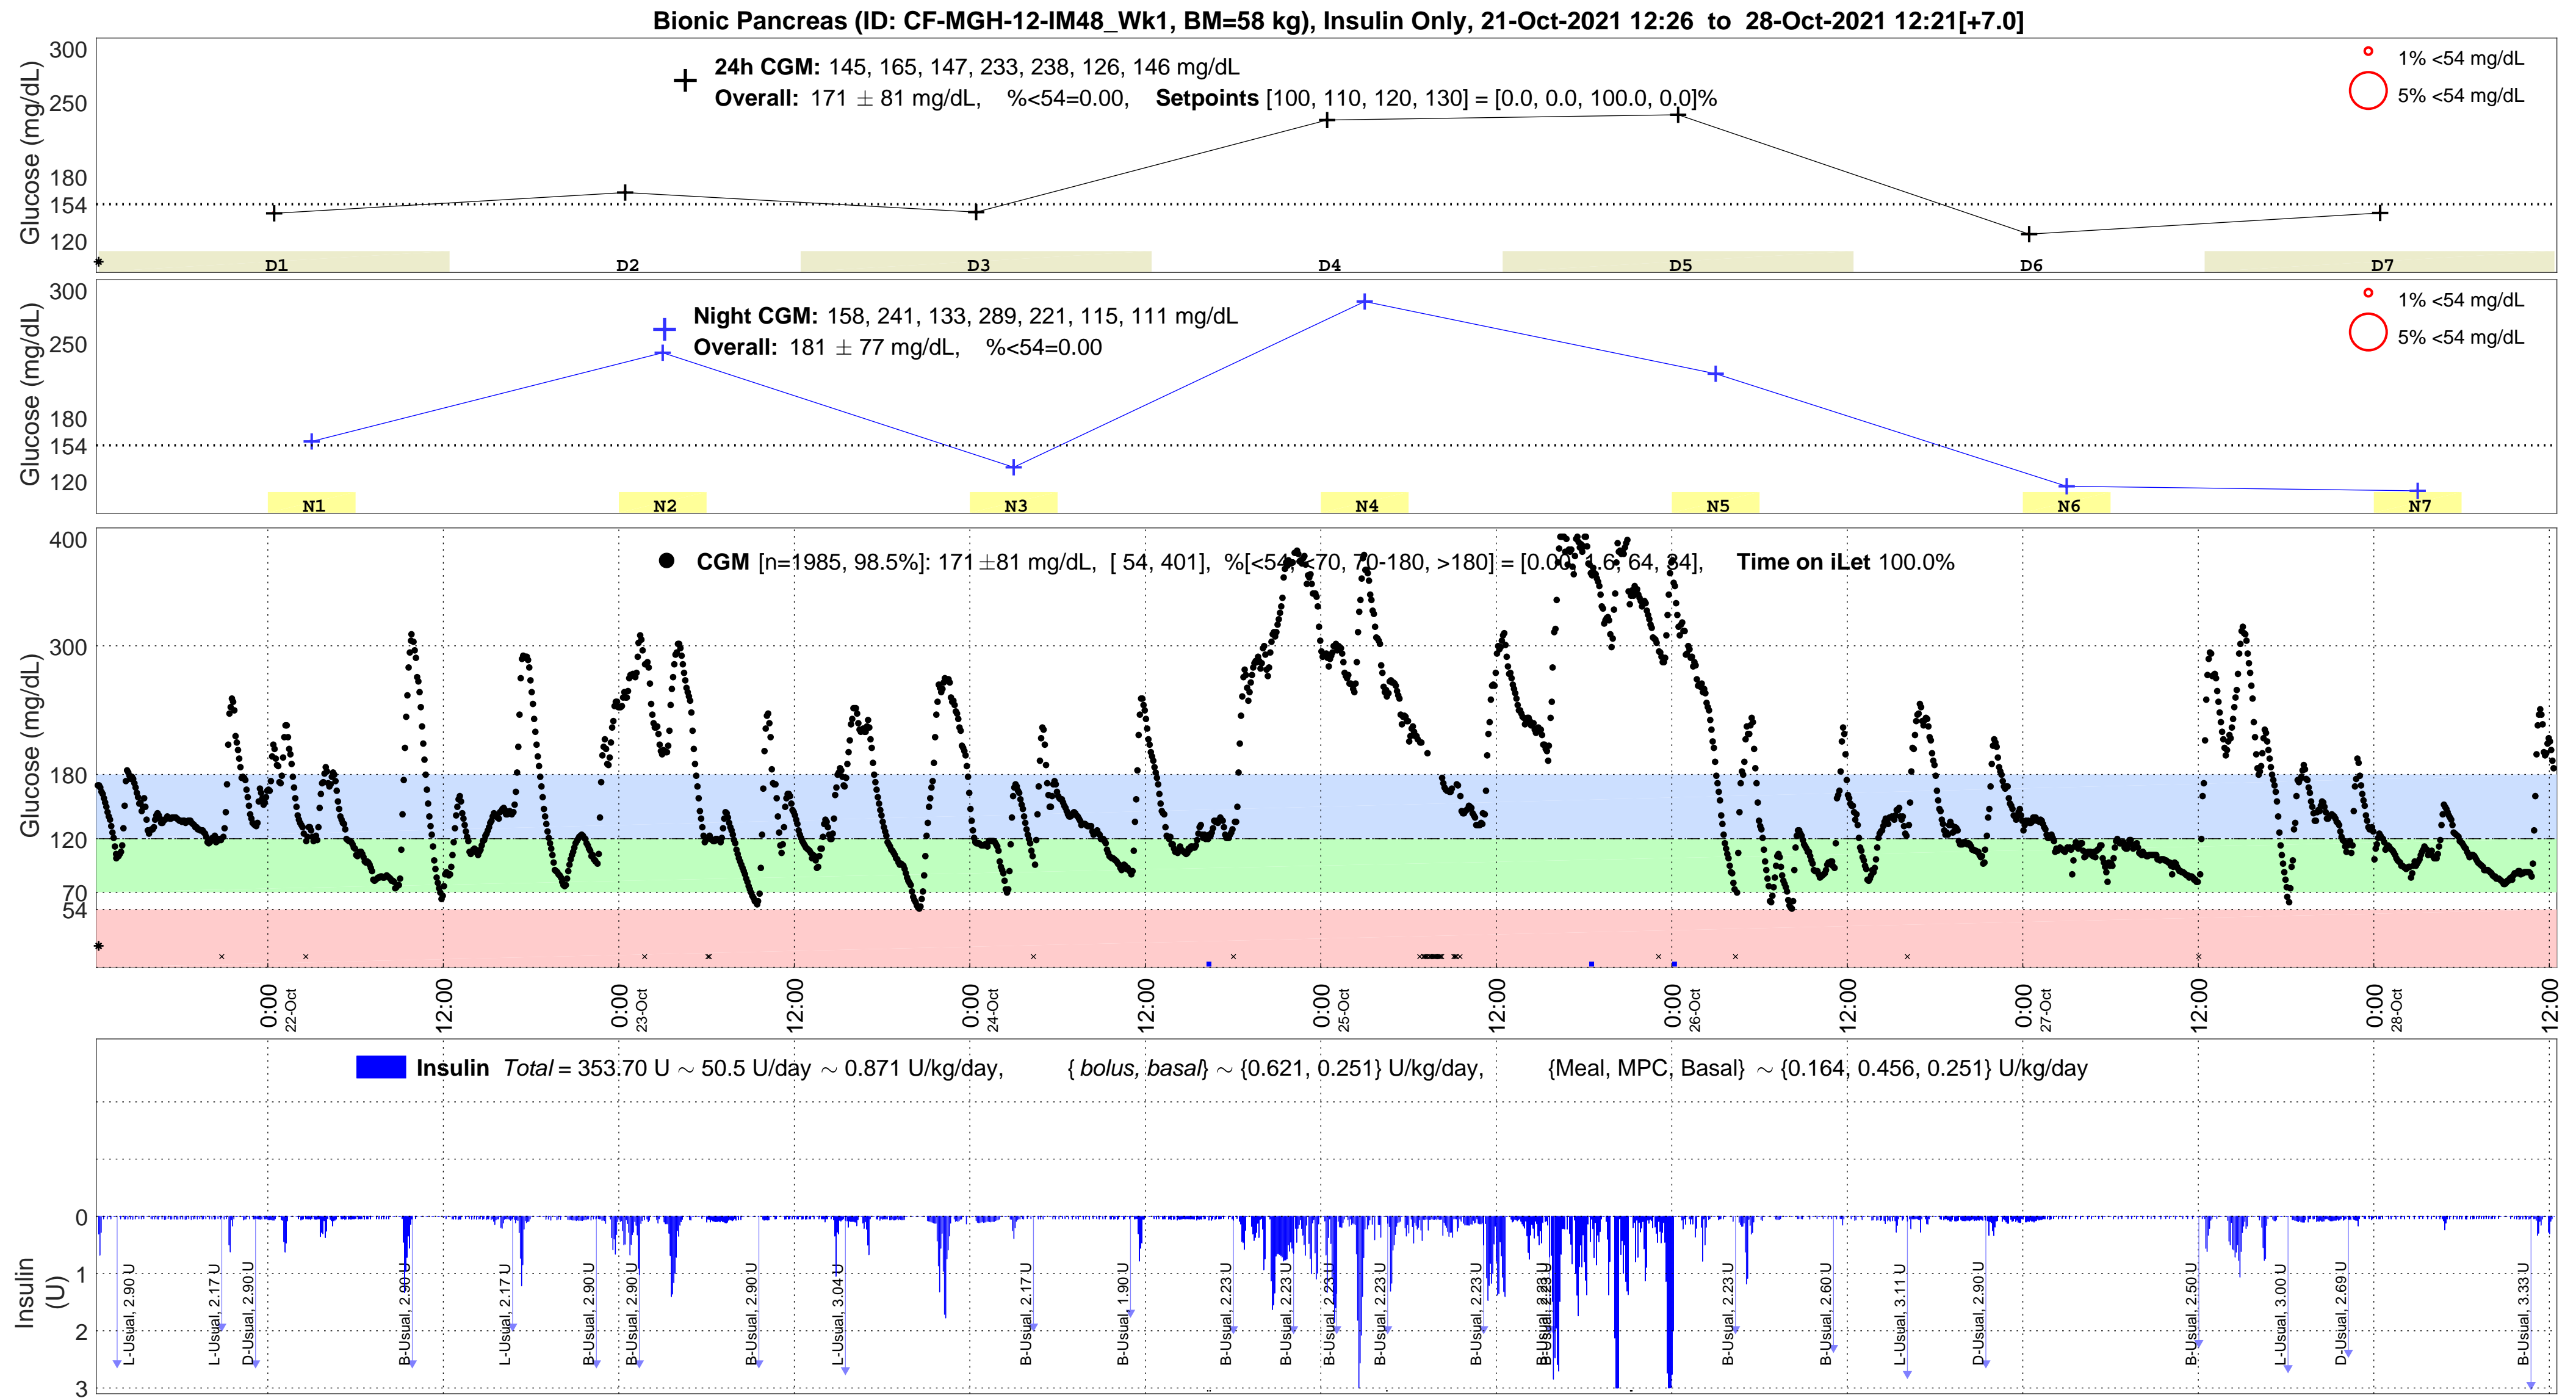

Bionic Pancreas (ID: CF-MGH-12-IM48\_Wk2, BM=58 kg), Insulin Only, 28-Oct-2021 12:26 to 04-Nov-2021 14:14[+7.1]

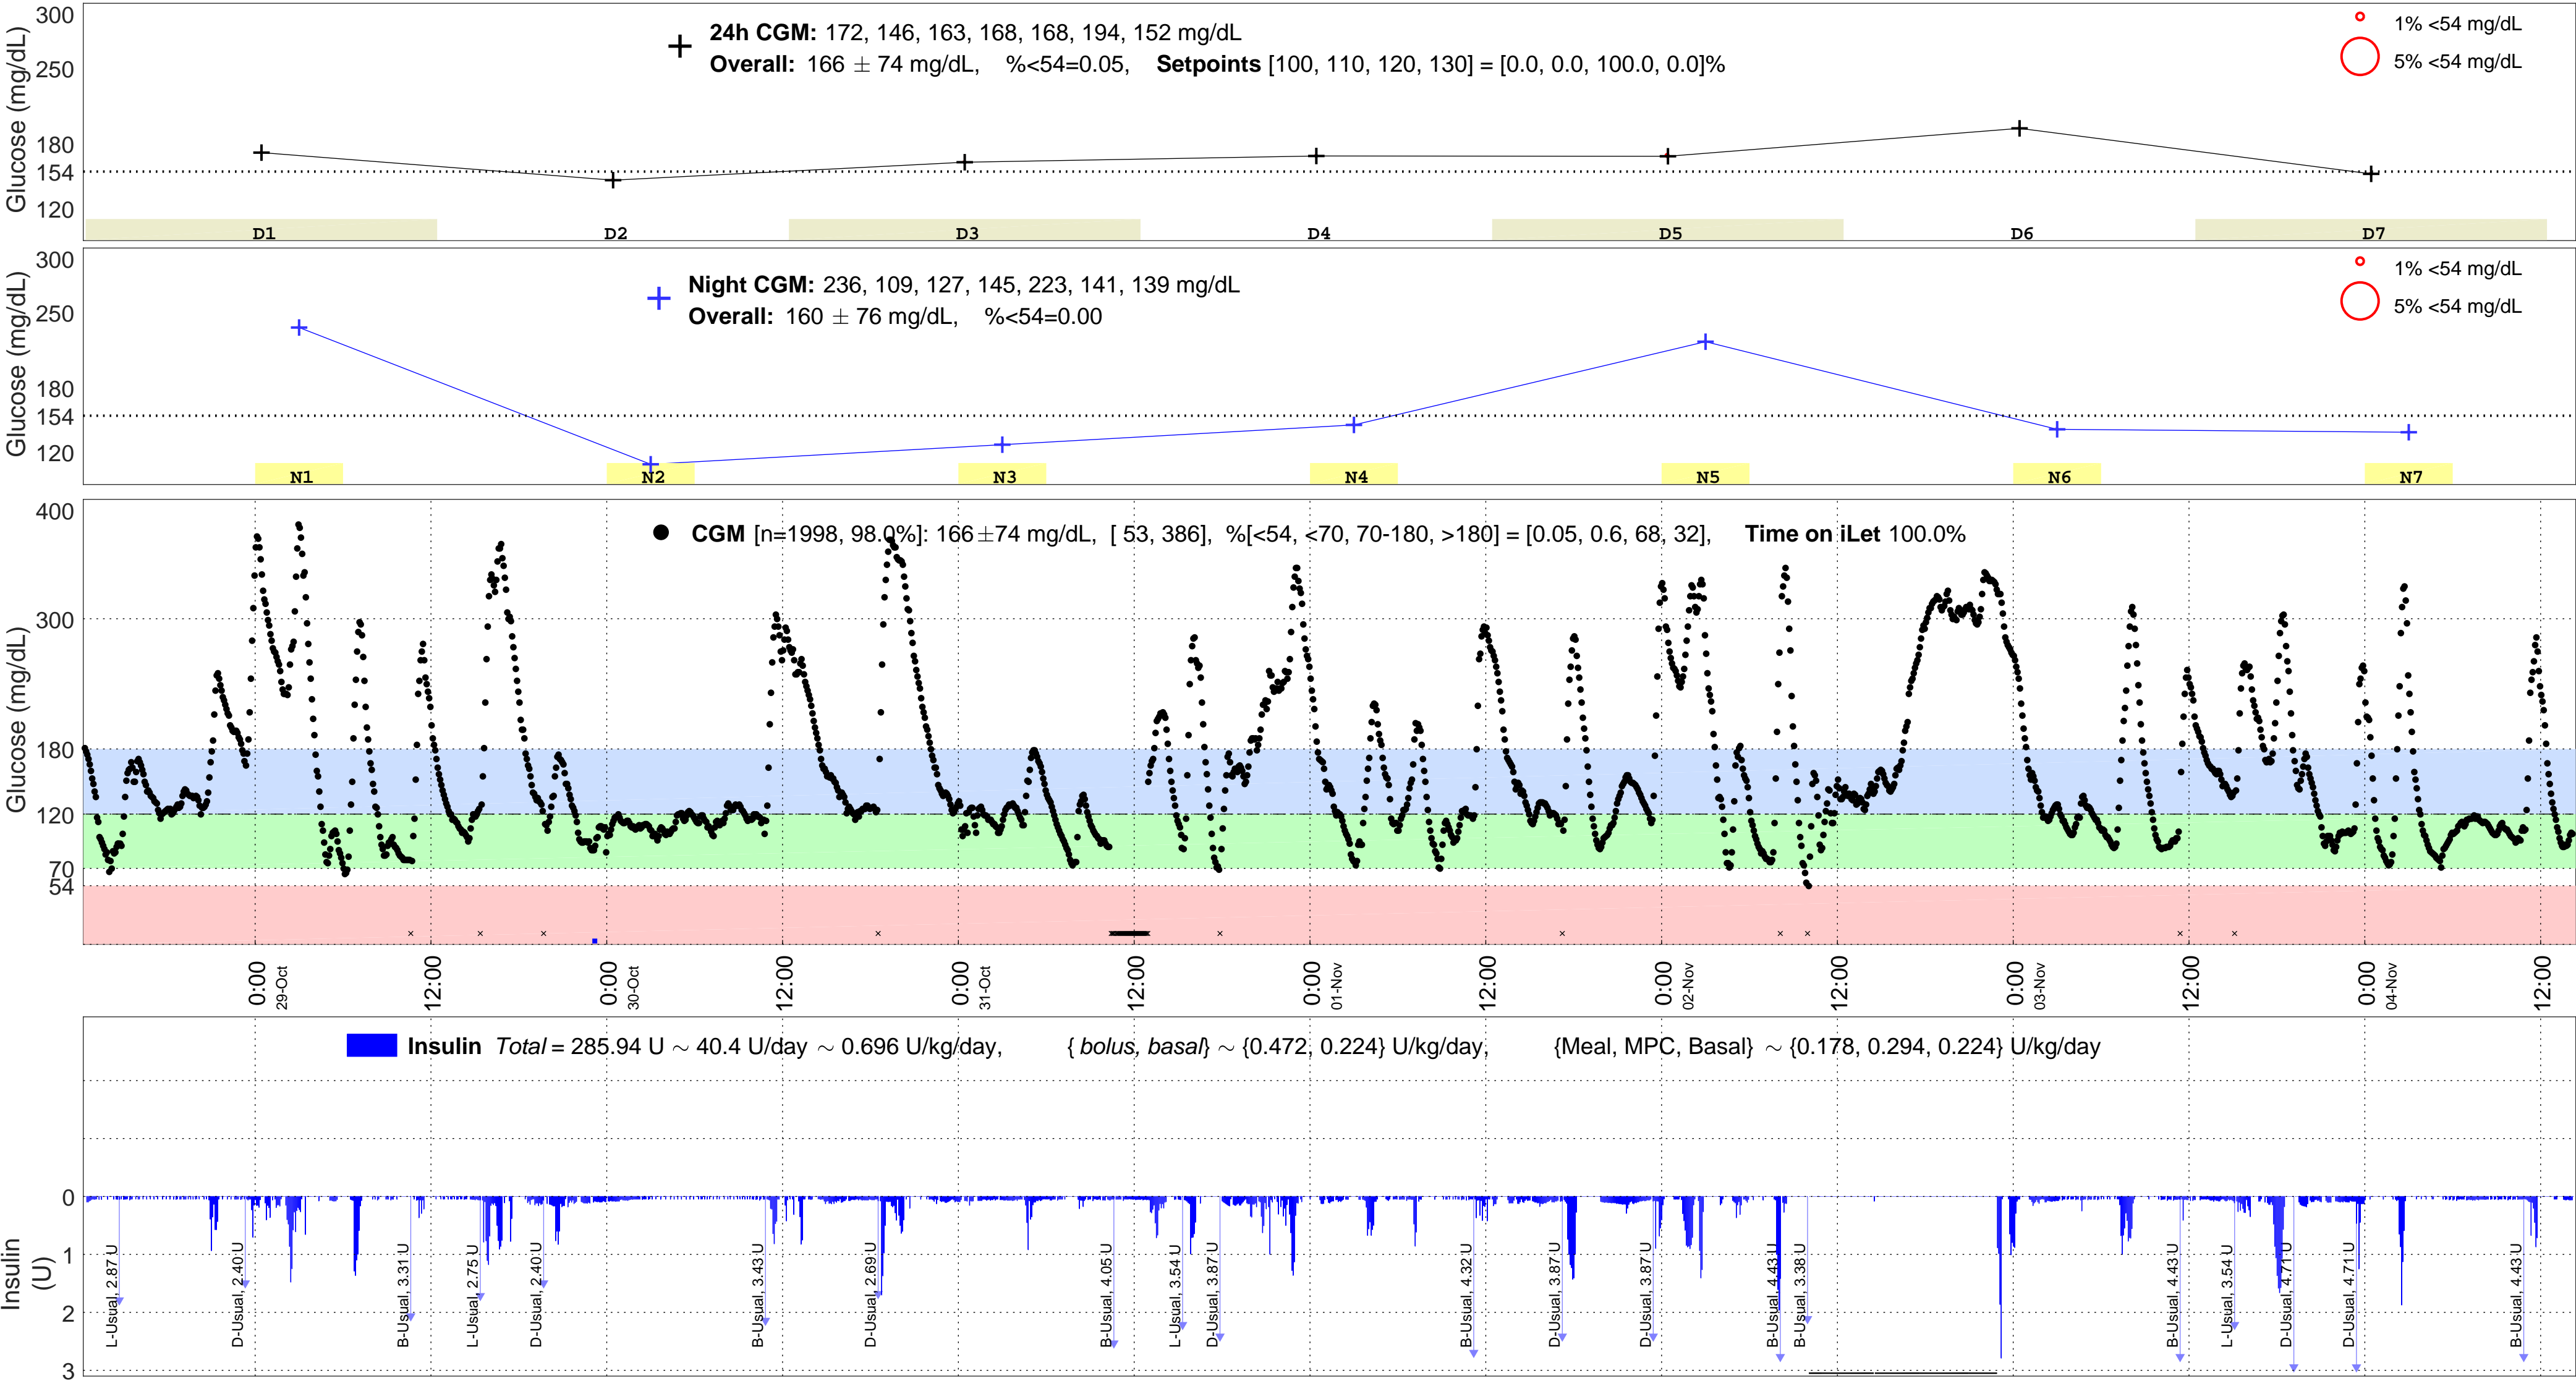



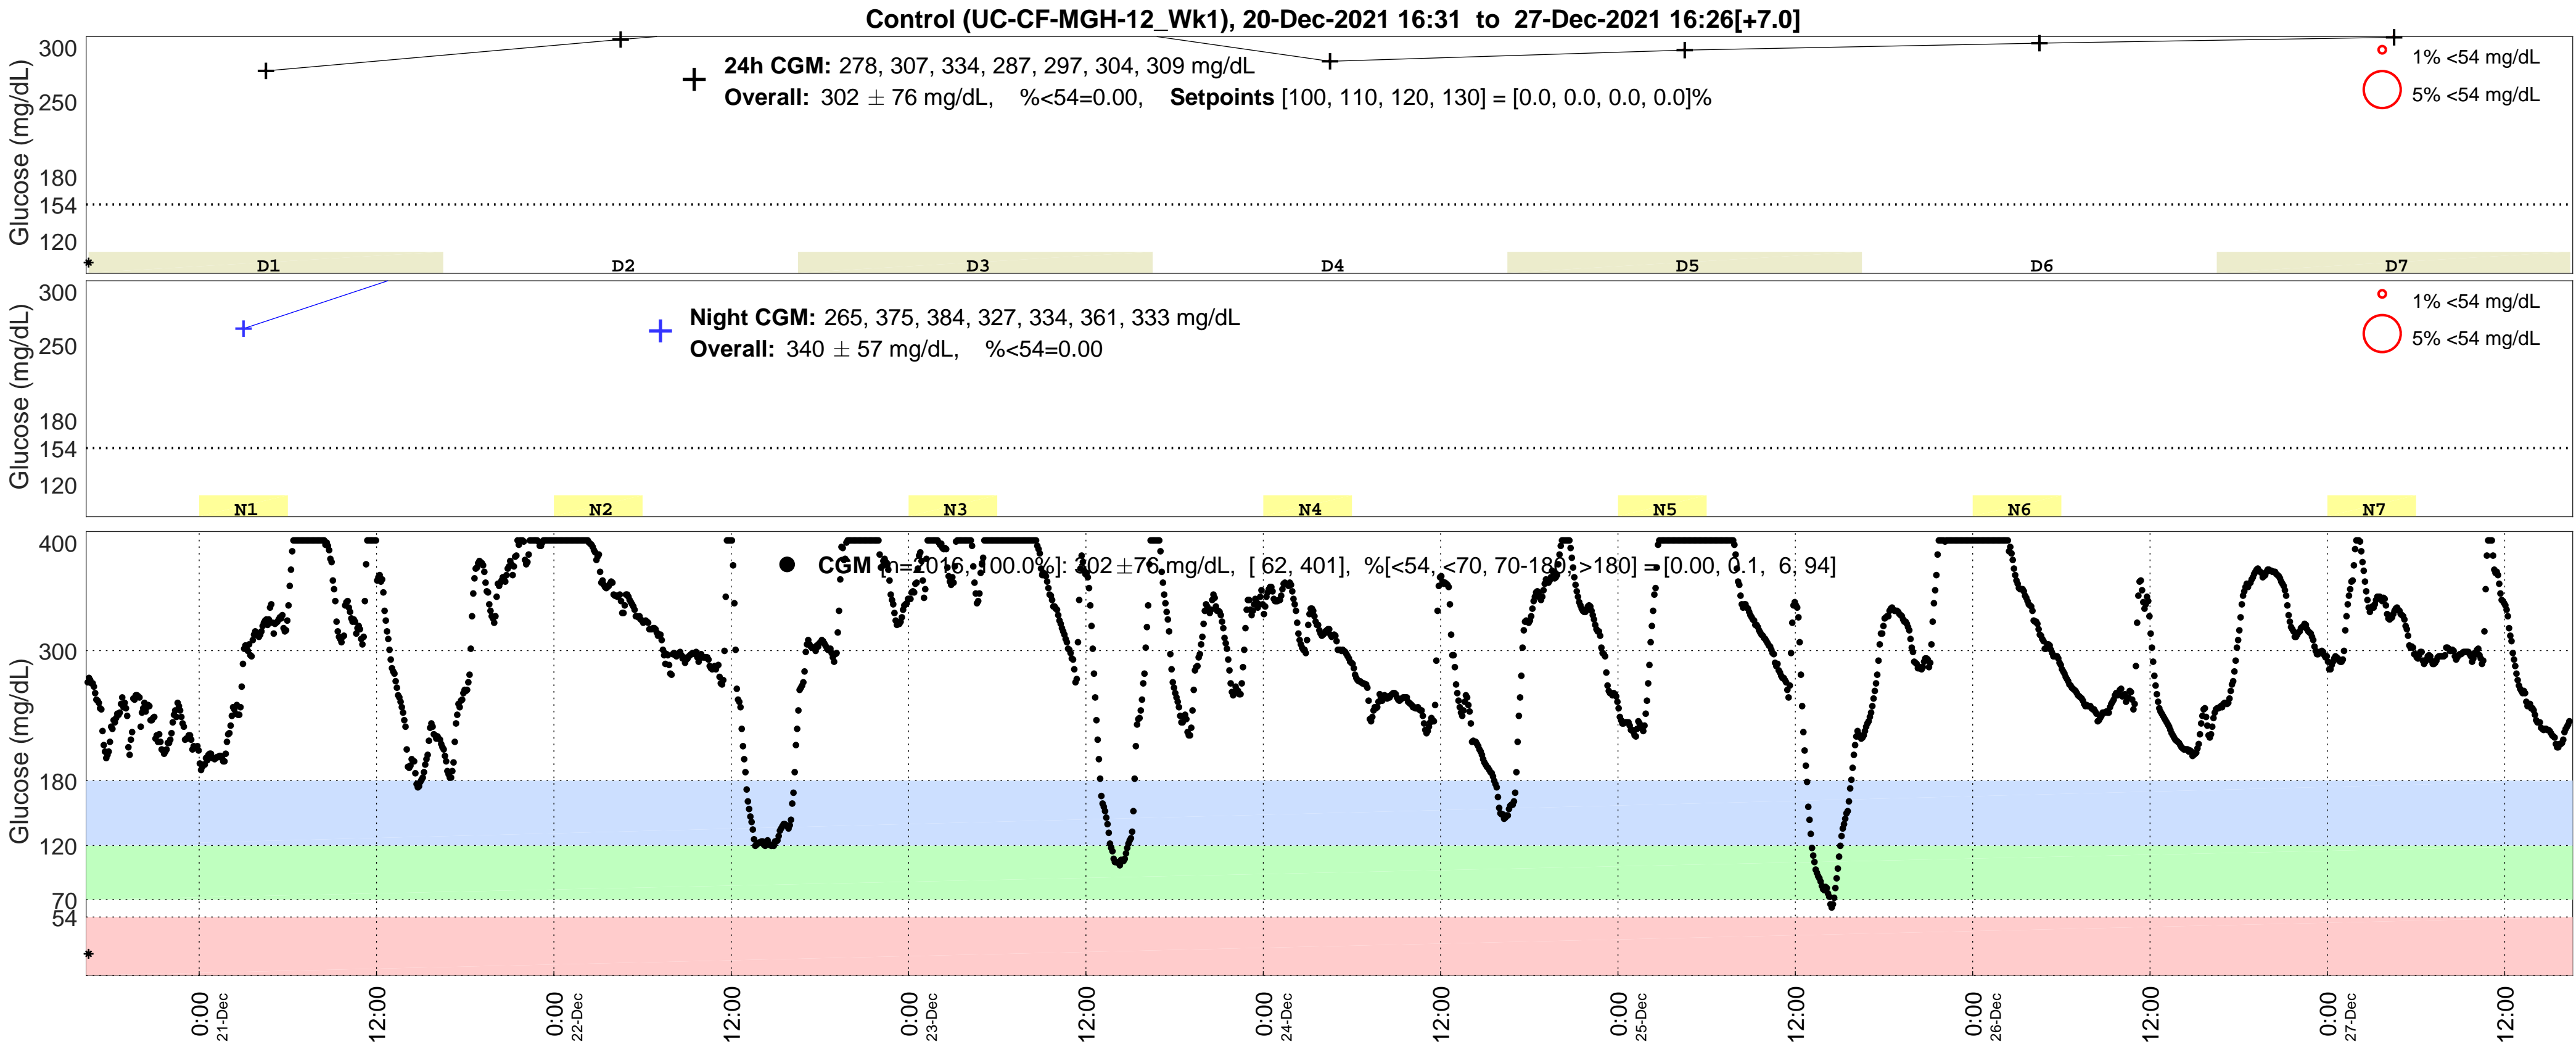

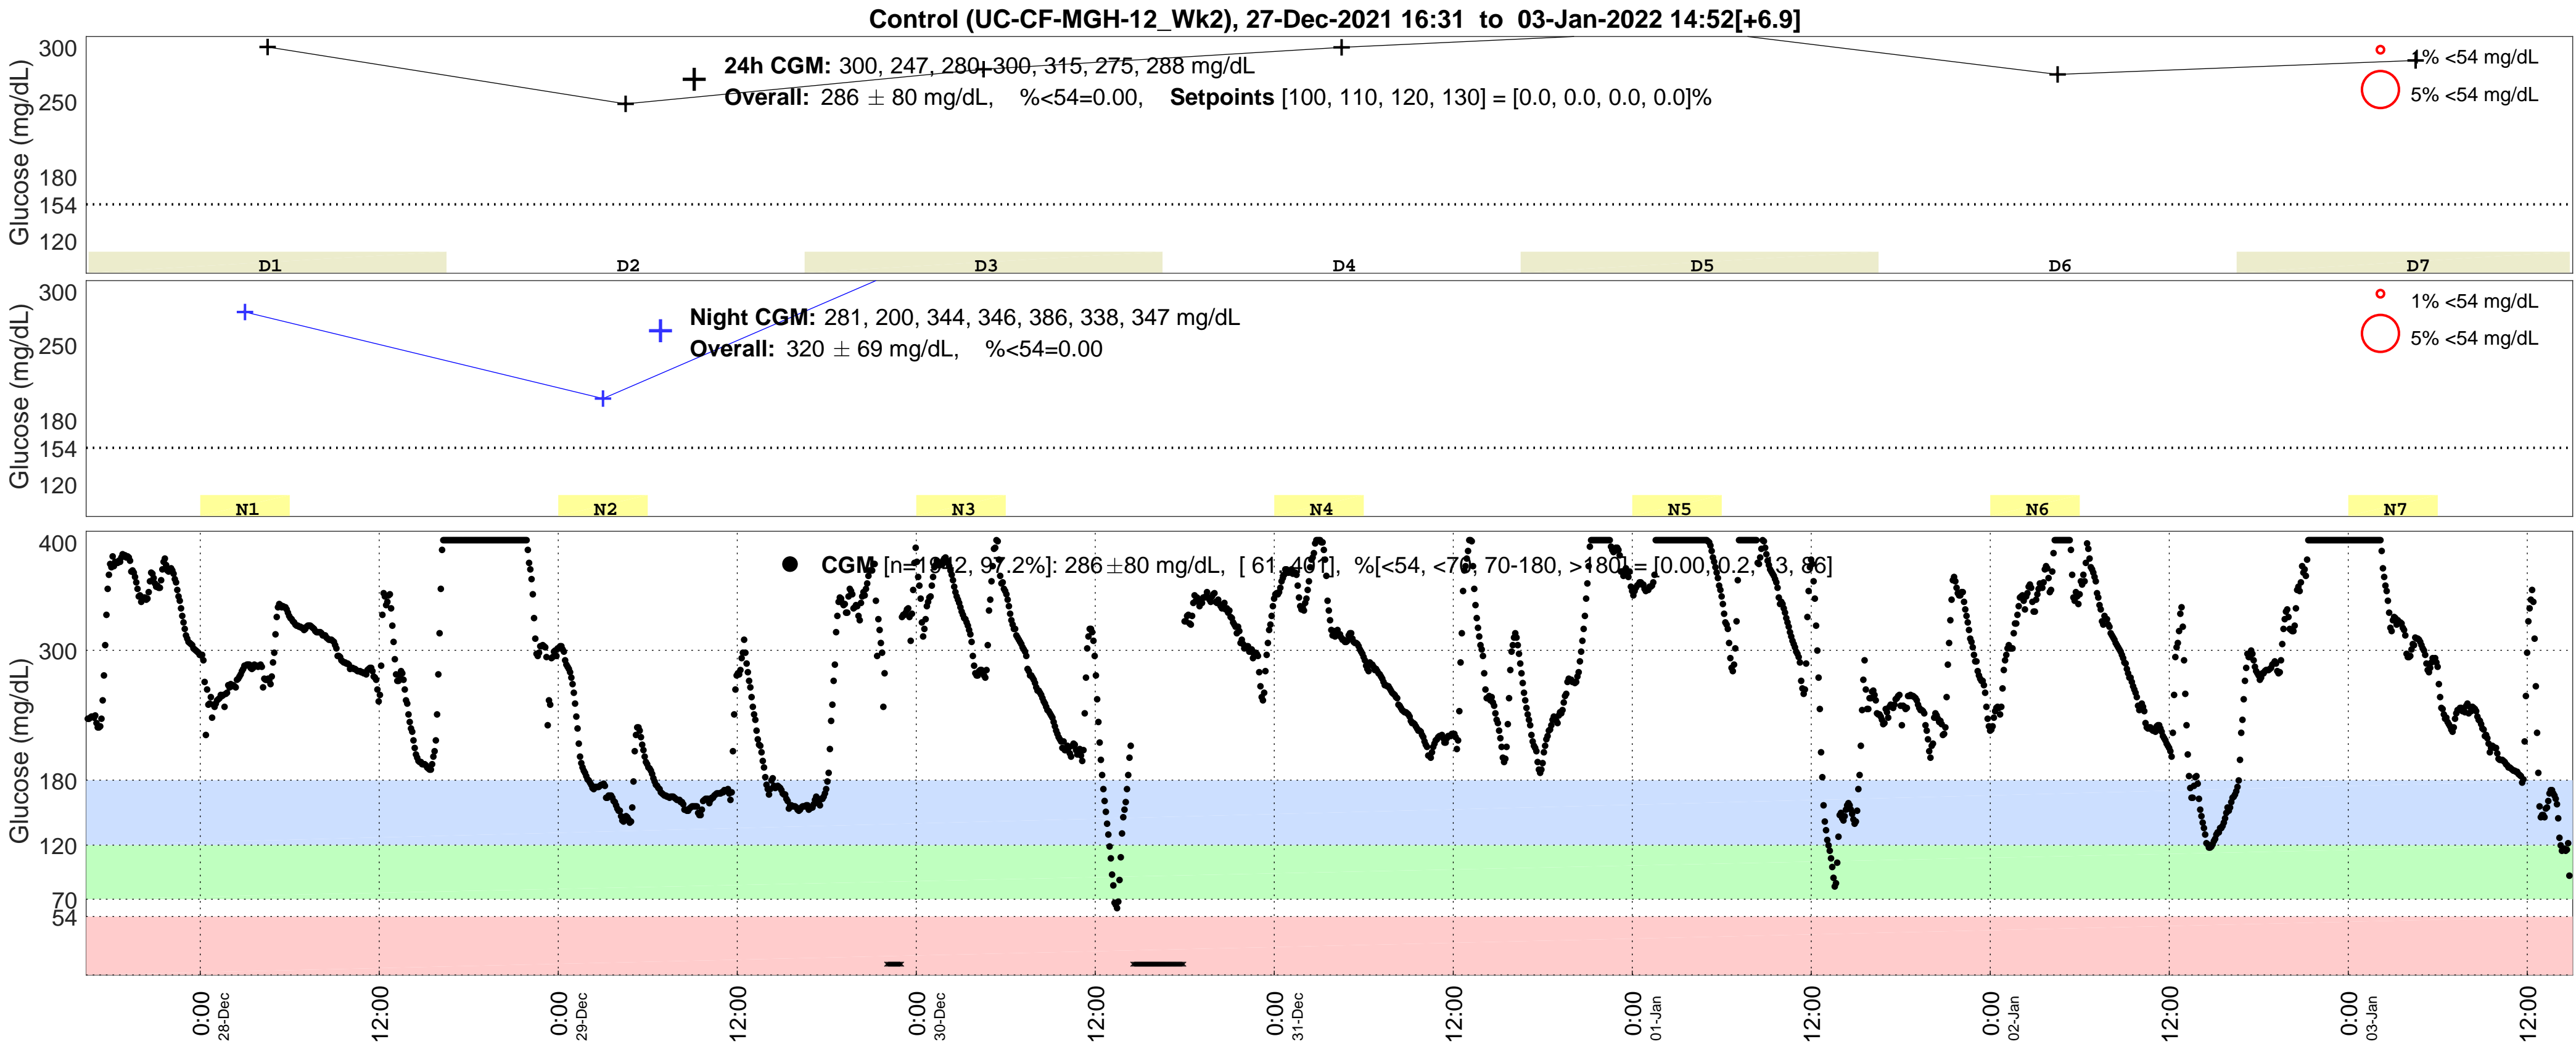

Bionic Pancreas (ID: CF-MGH-16-IP36\_Wk1, BM=46 kg), Insulin Only, 05-Nov-2021 13:10 to 12-Nov-2021 12:05[+7.0]

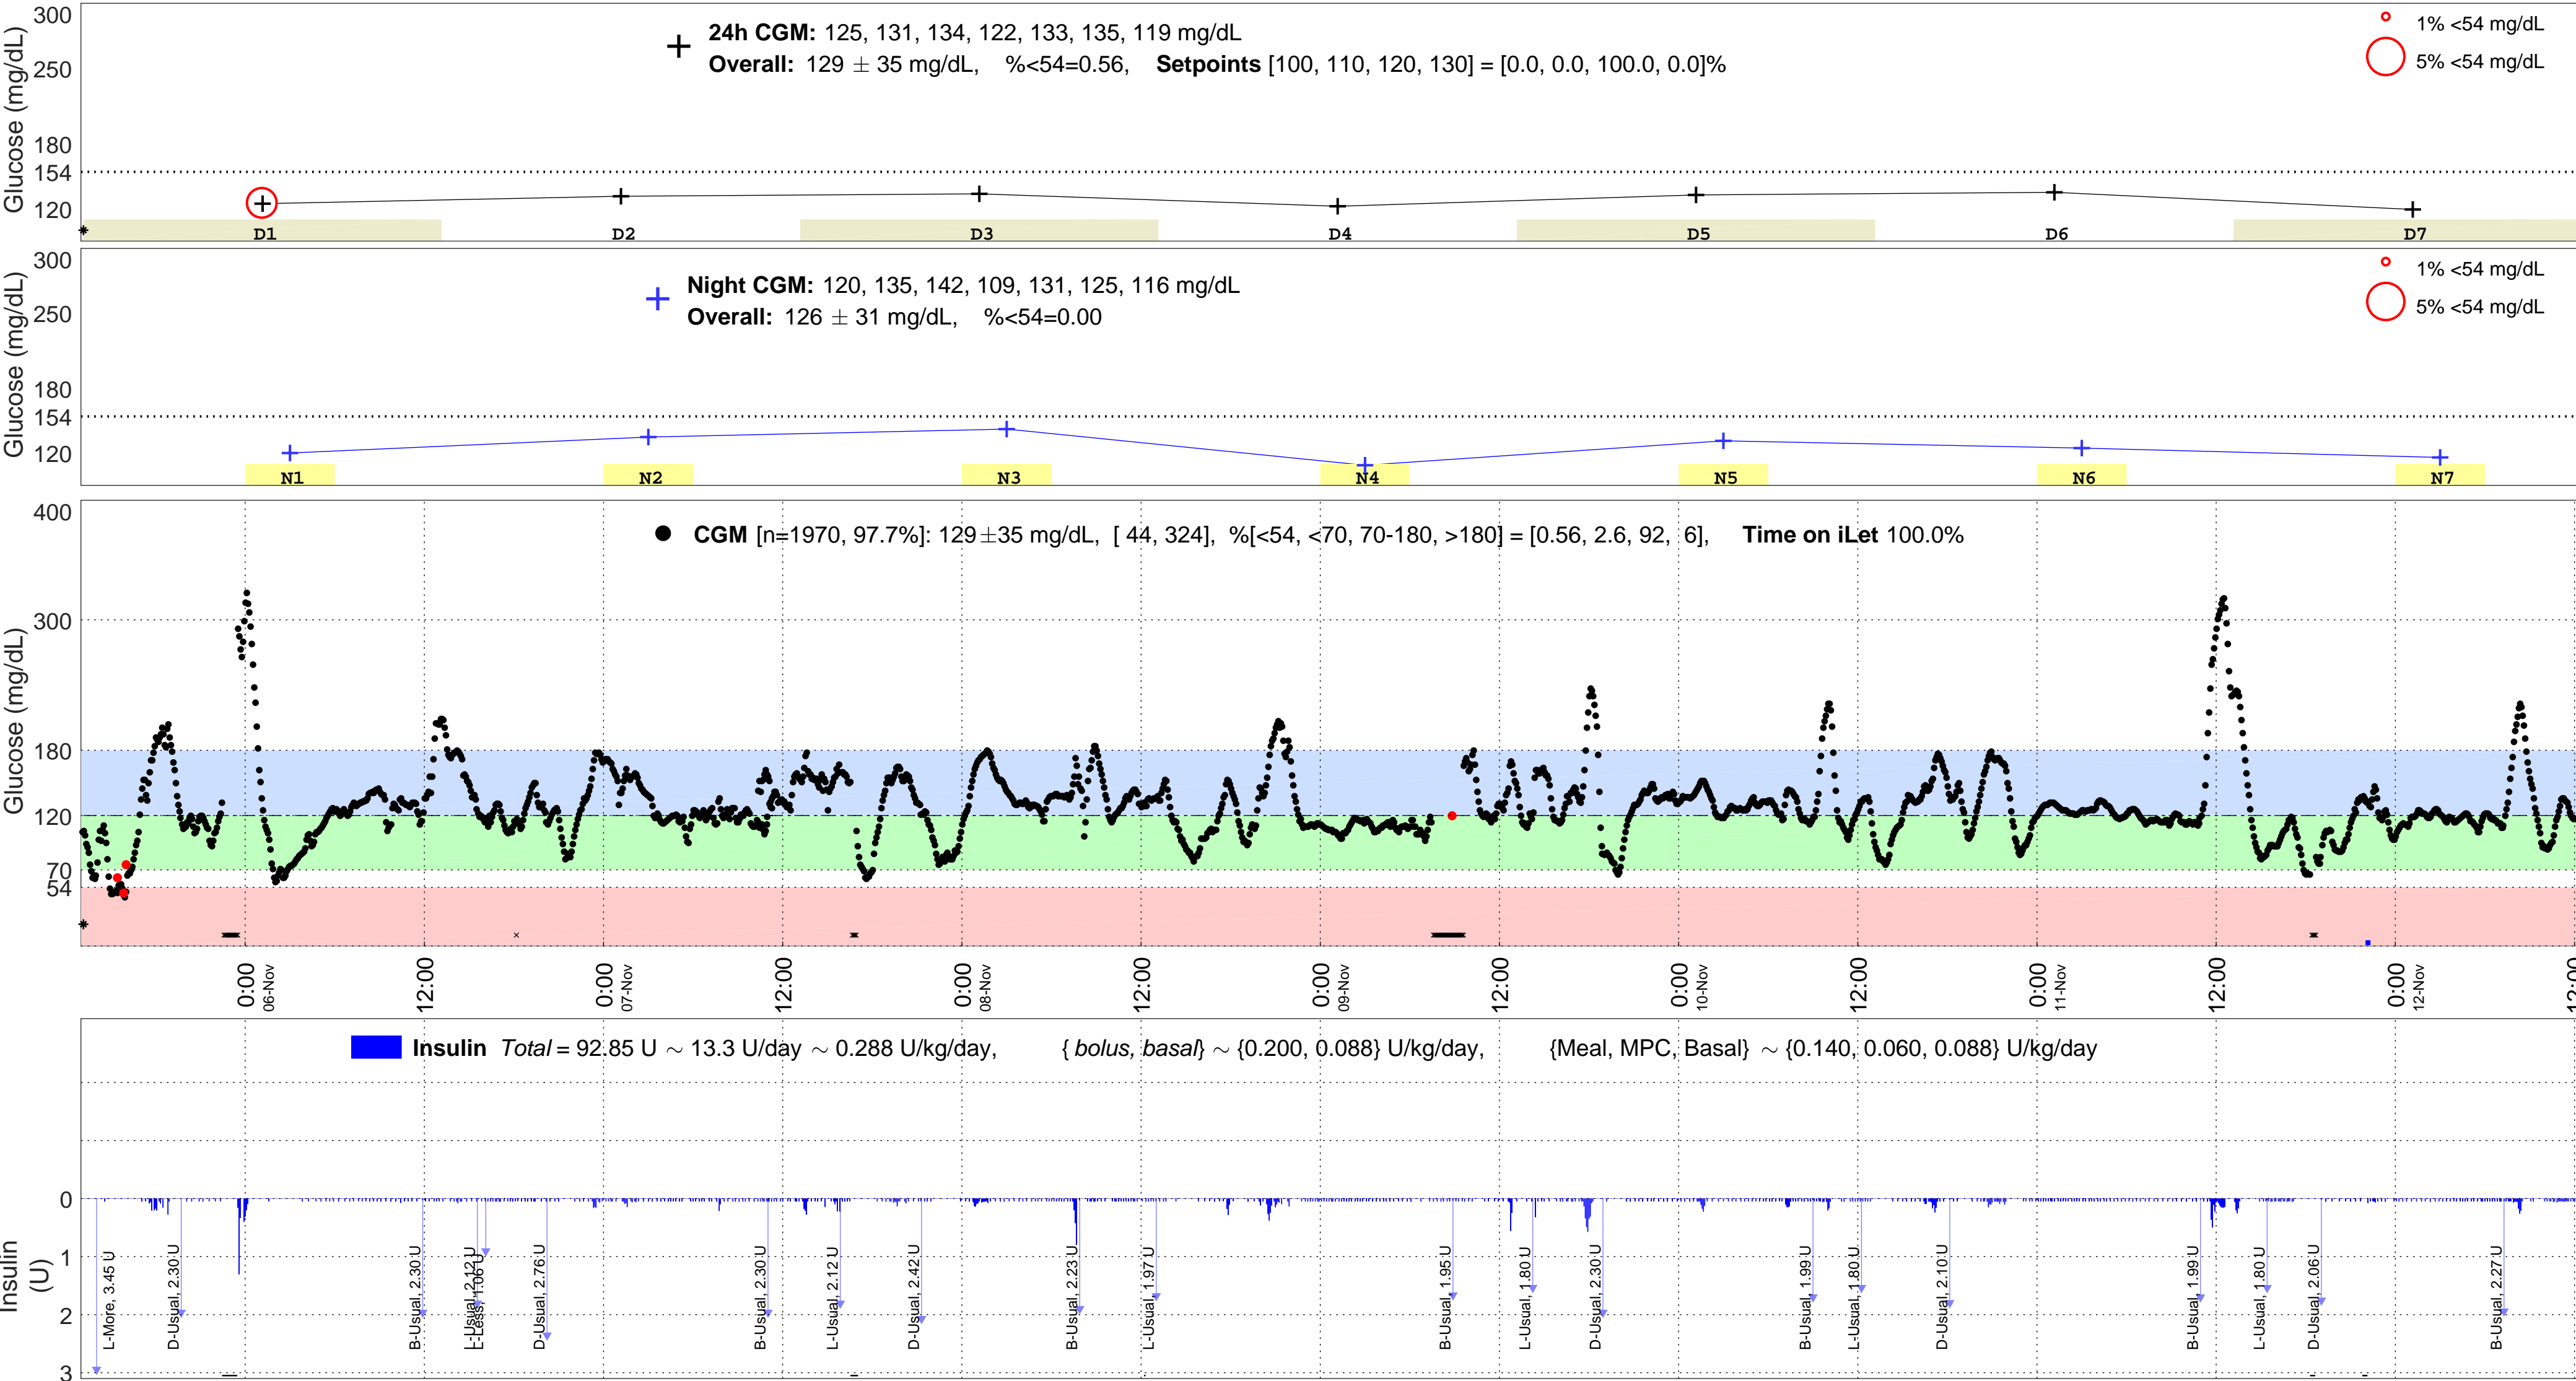

Bionic Pancreas (ID: CF-MGH-16-IP36\_Wk2, BM=46 kg), Insulin Only, 12-Nov-2021 12:10 to 19-Nov-2021 13:25[+7.1]

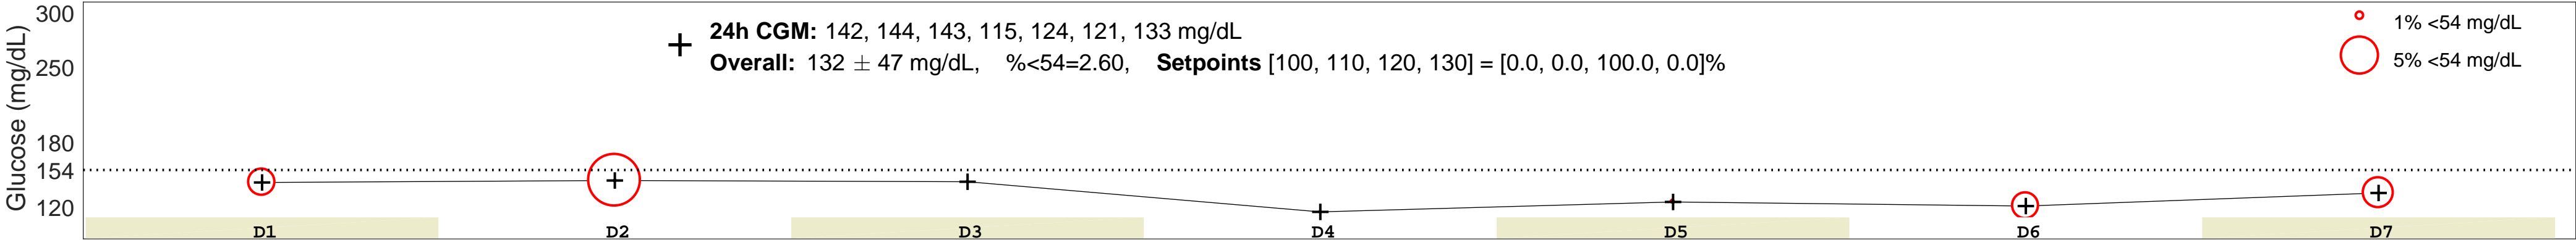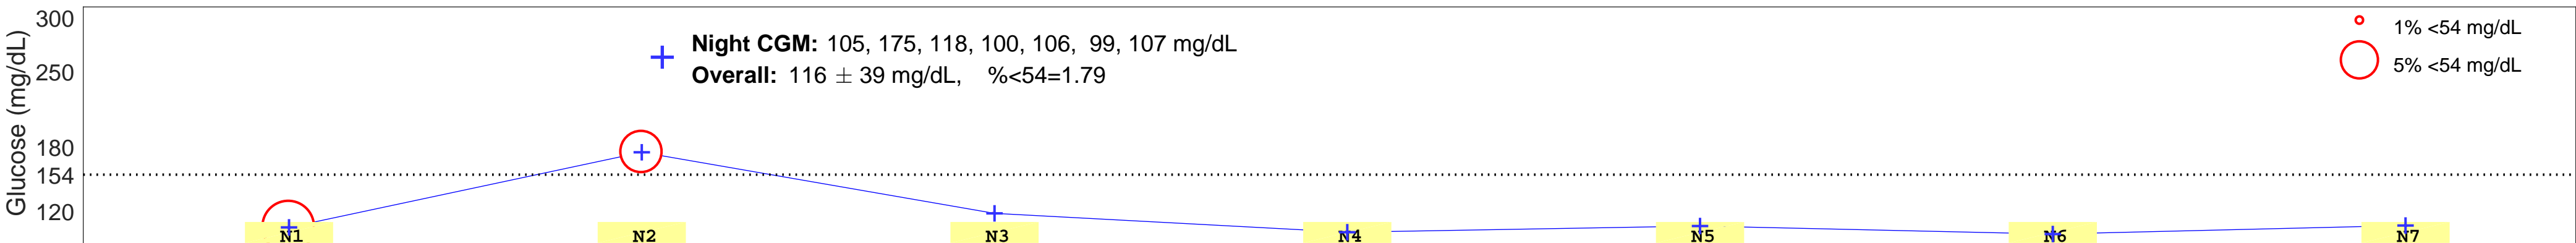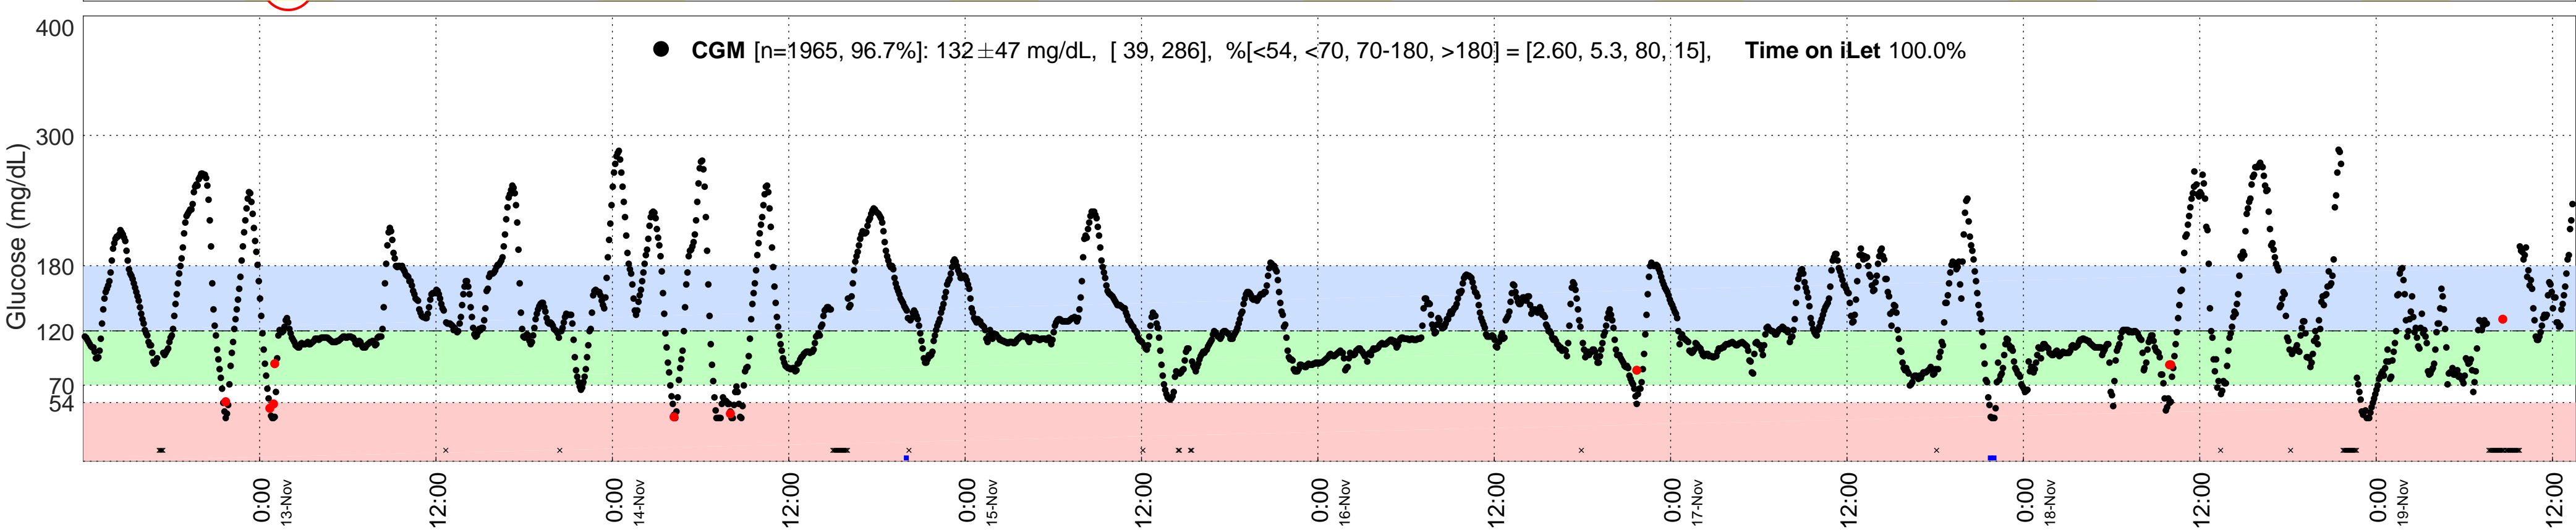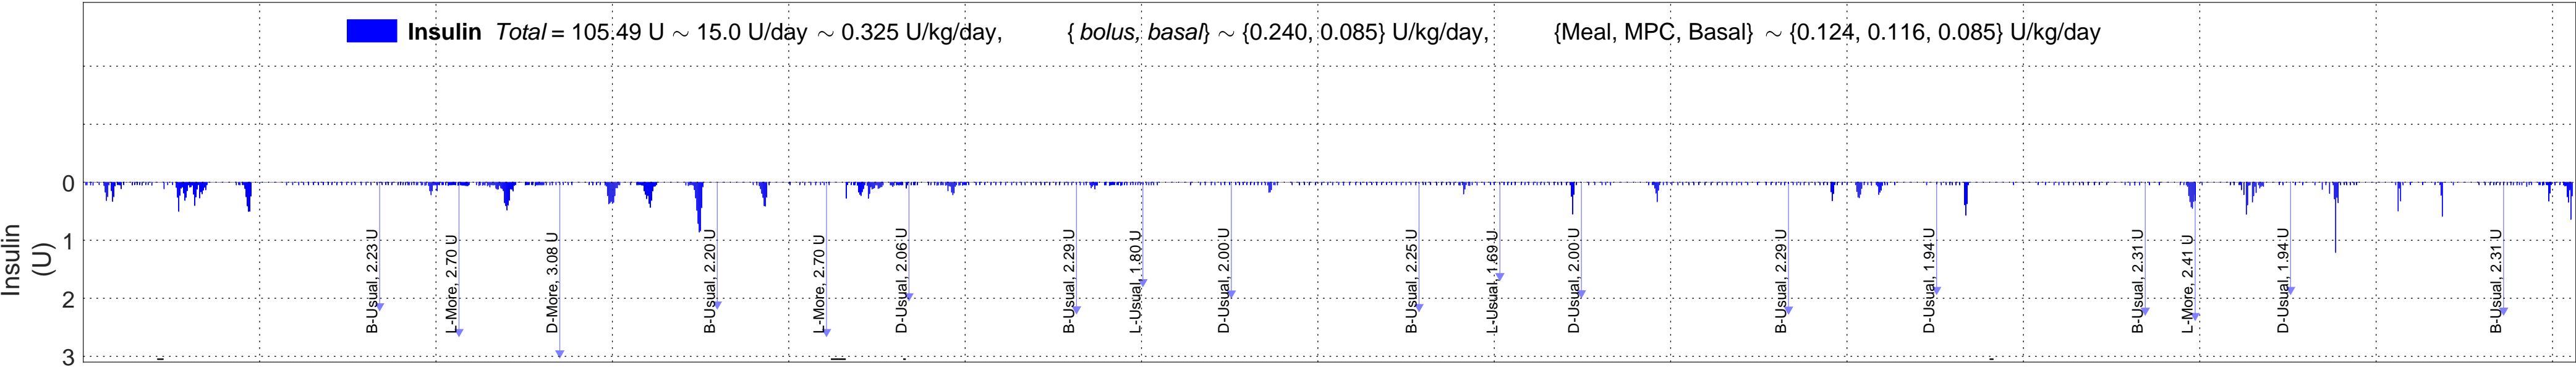

Control (UC-CF-MGH-16\_Wk1), 19-Nov-2021 13:26 to 26-Nov-2021 13:21[+7.0]

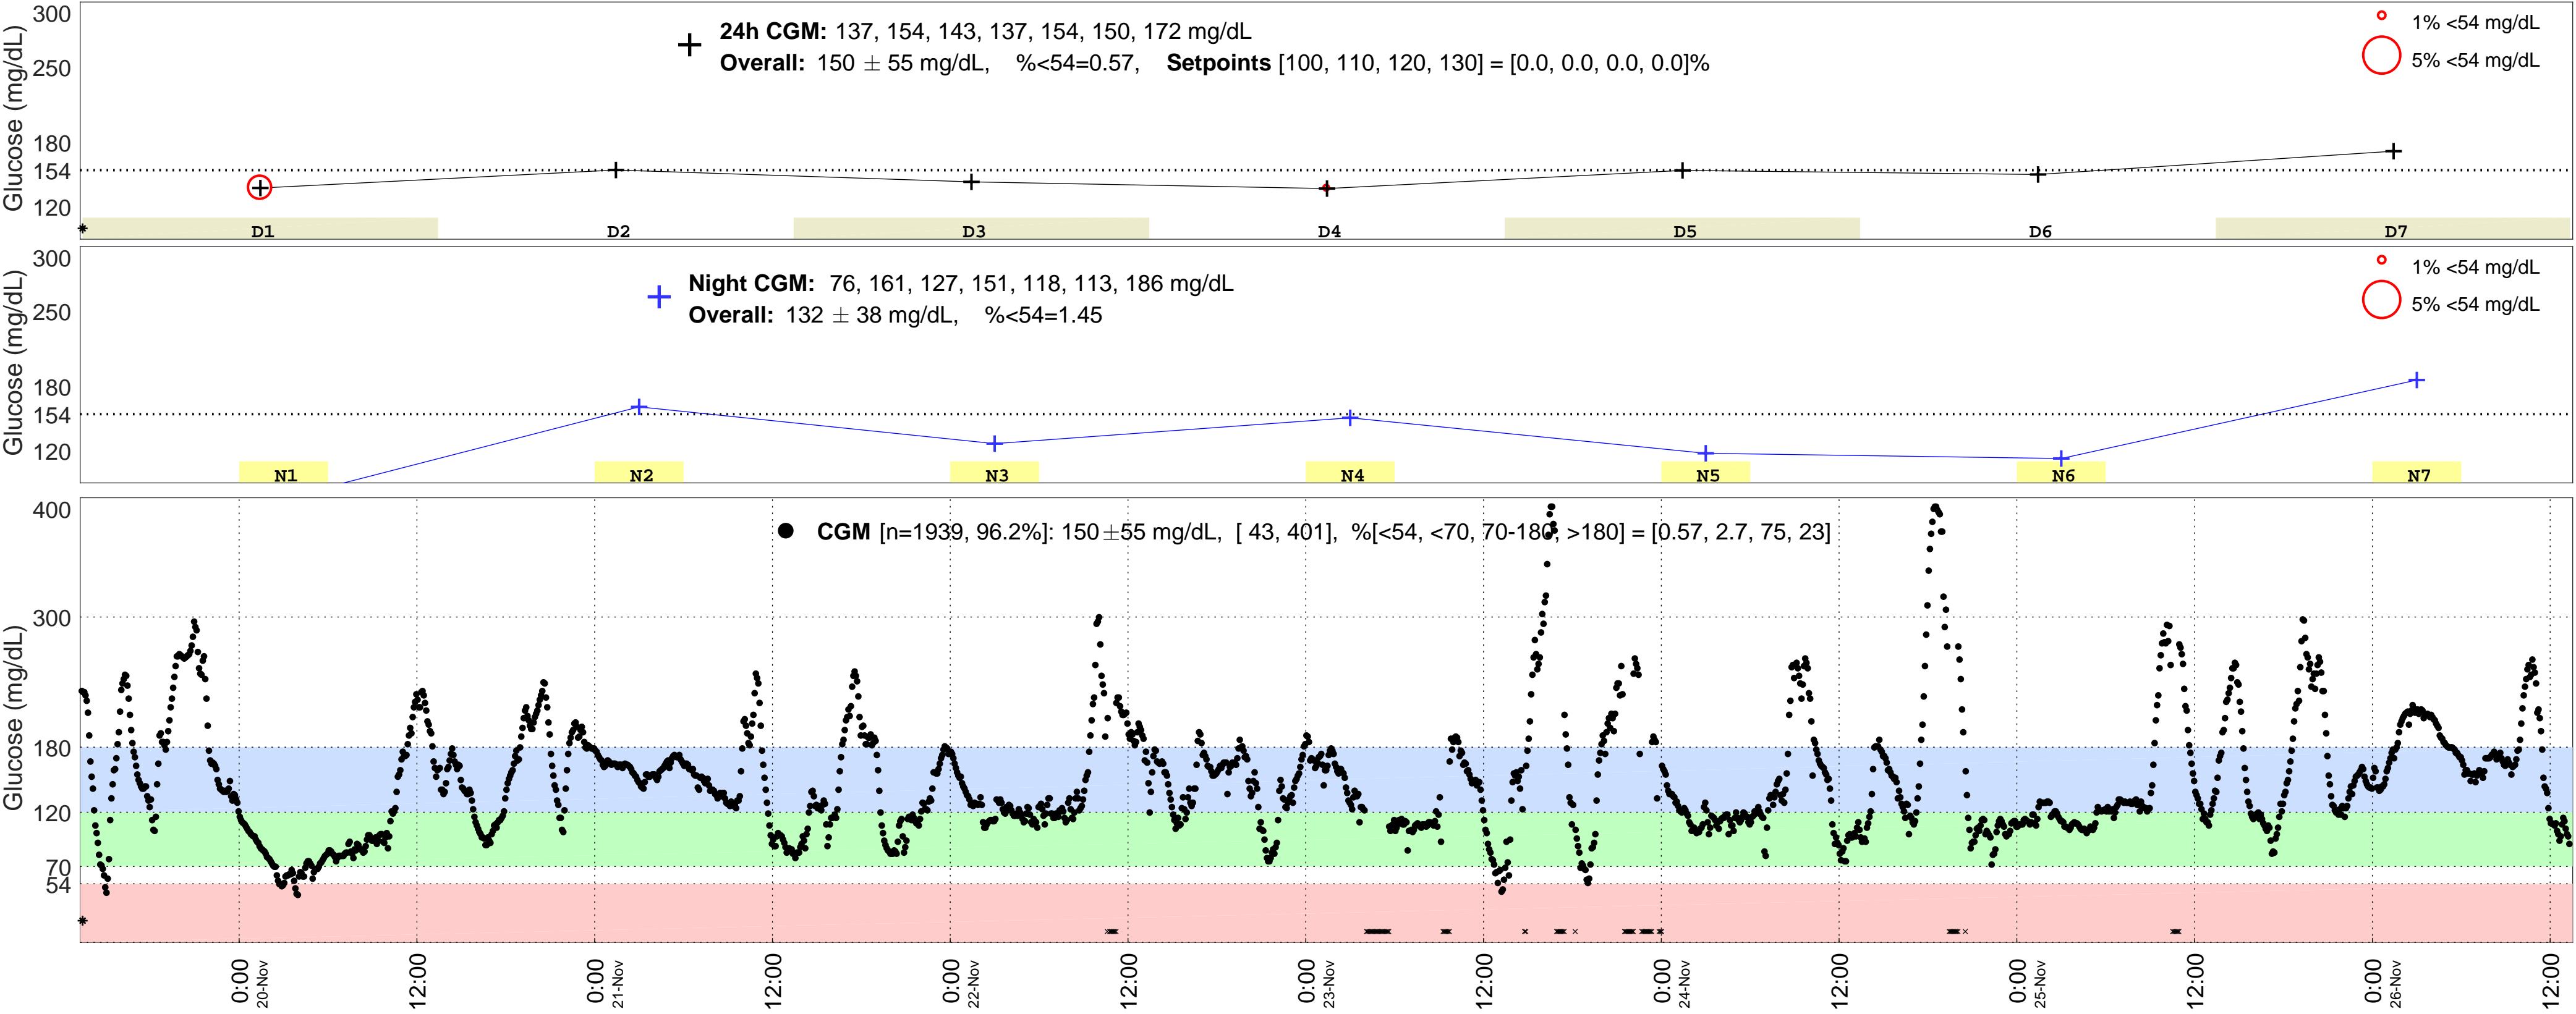



Control (UC-CF-MGH-16\_Wk2), 26-Nov-2021 13:26 to 03-Dec-2021 15:32[+7.1]

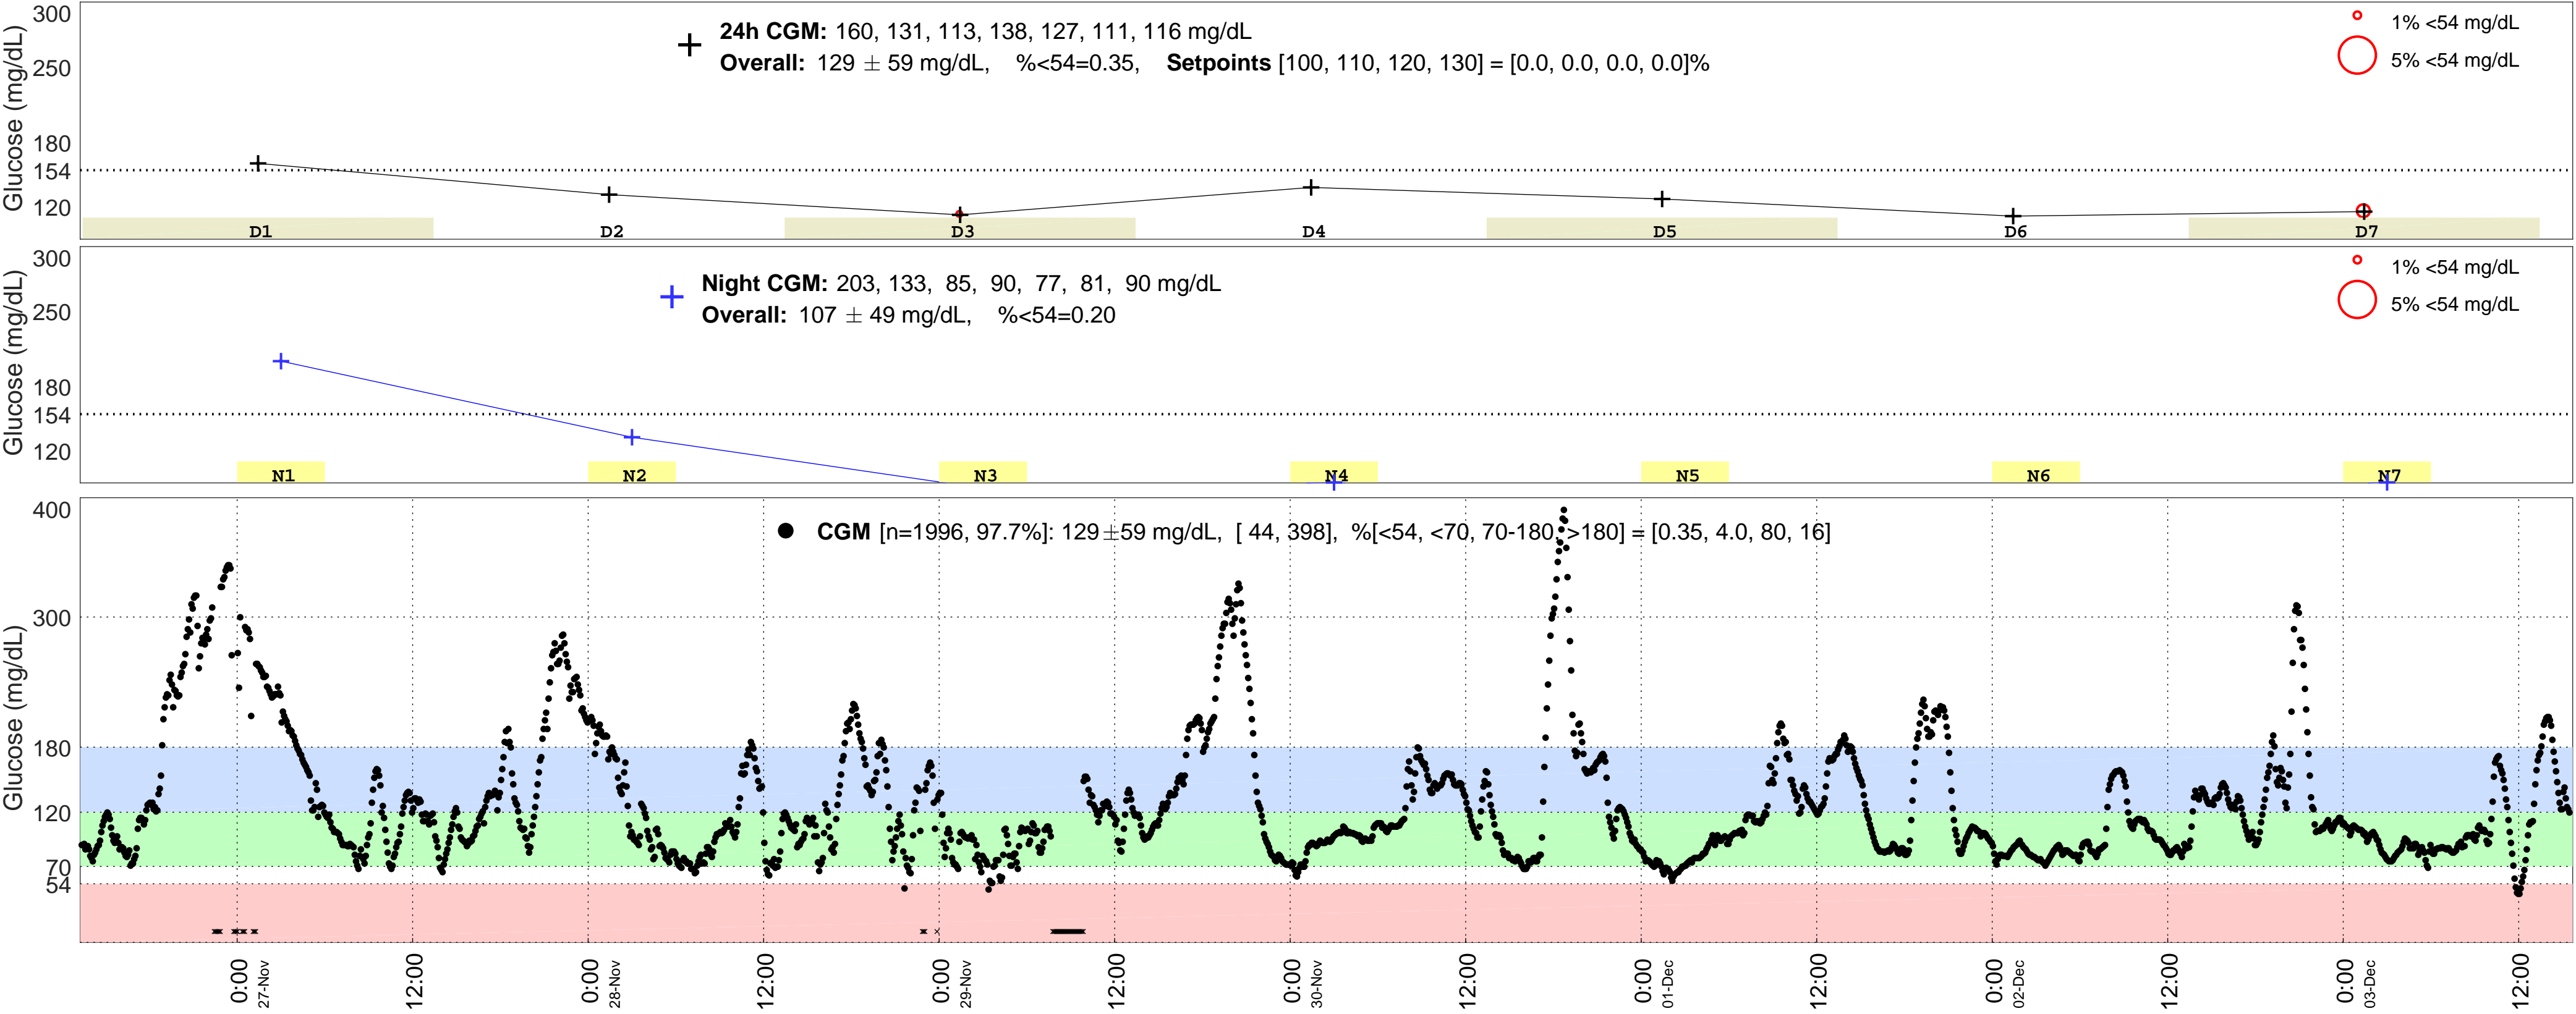

Bionic Pancreas (ID: CF-MGH-17-IP43\_Wk1, BM=51 kg), Insulin Only, 30-Sep-2021 12:38 to 07-Oct-2021 12:33[+7.0]

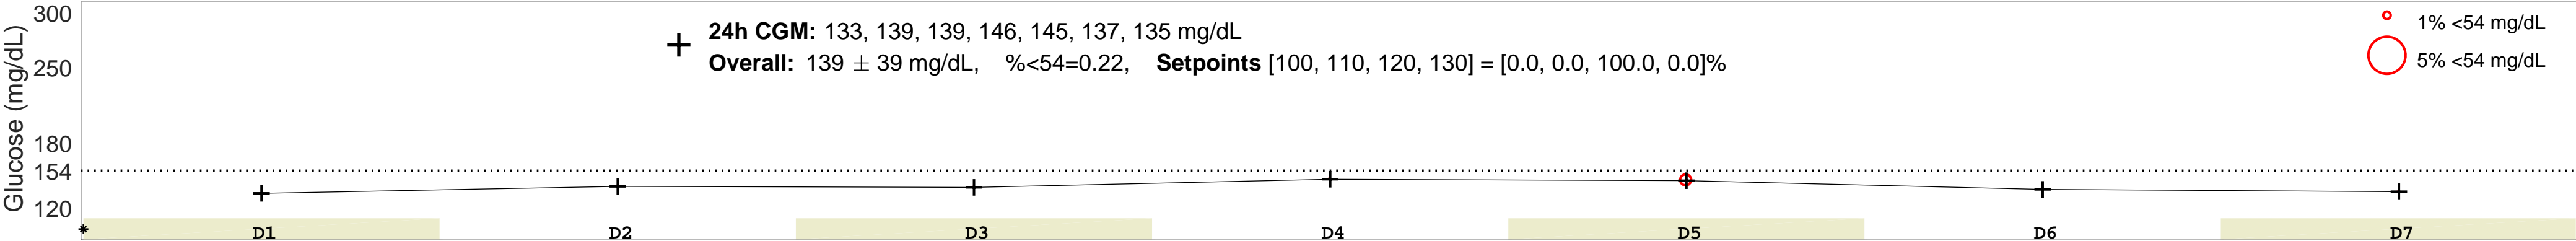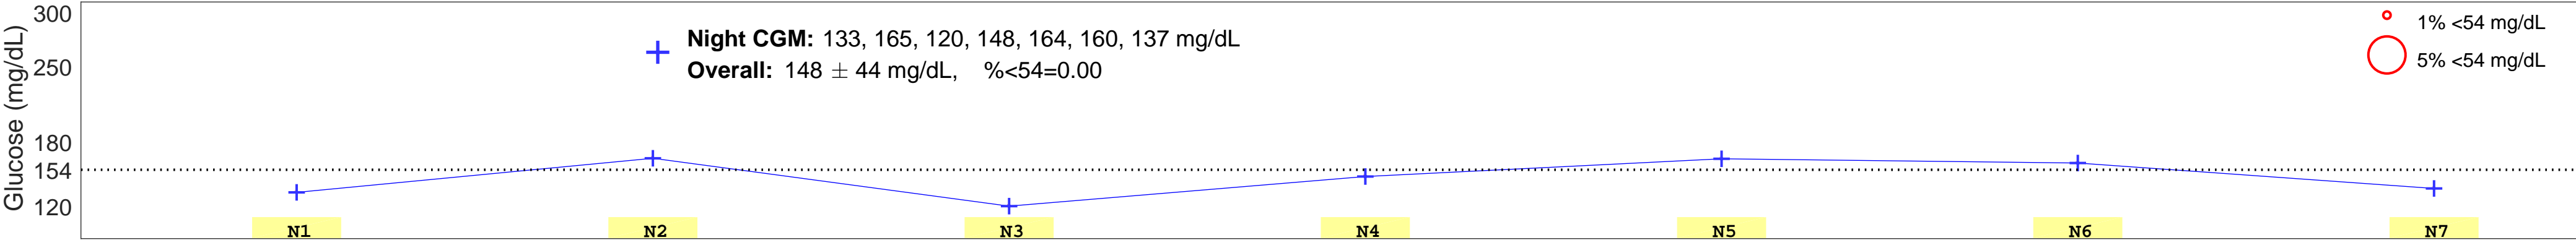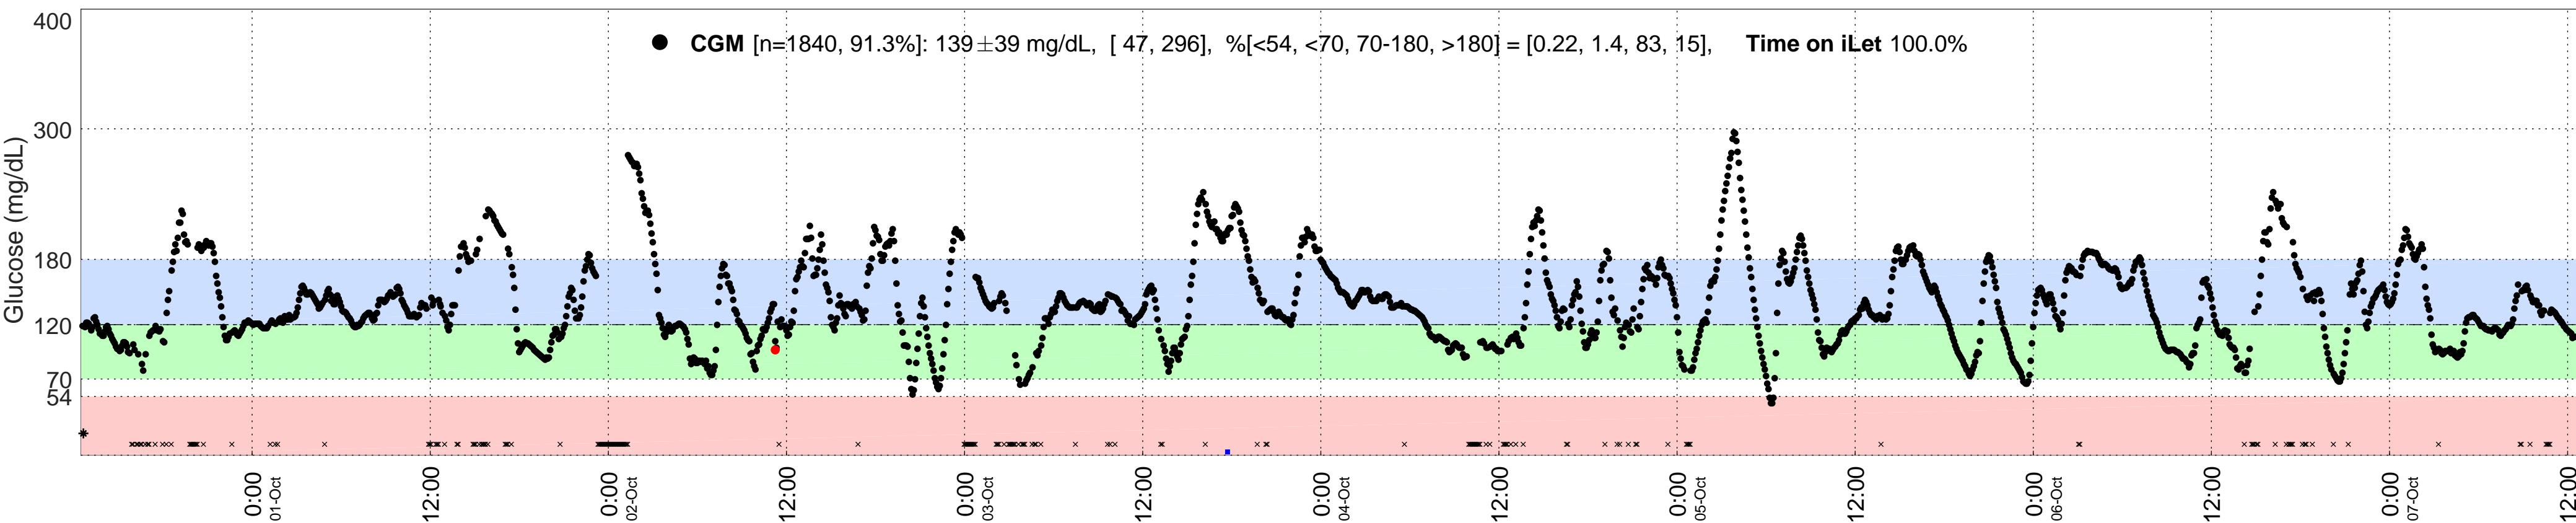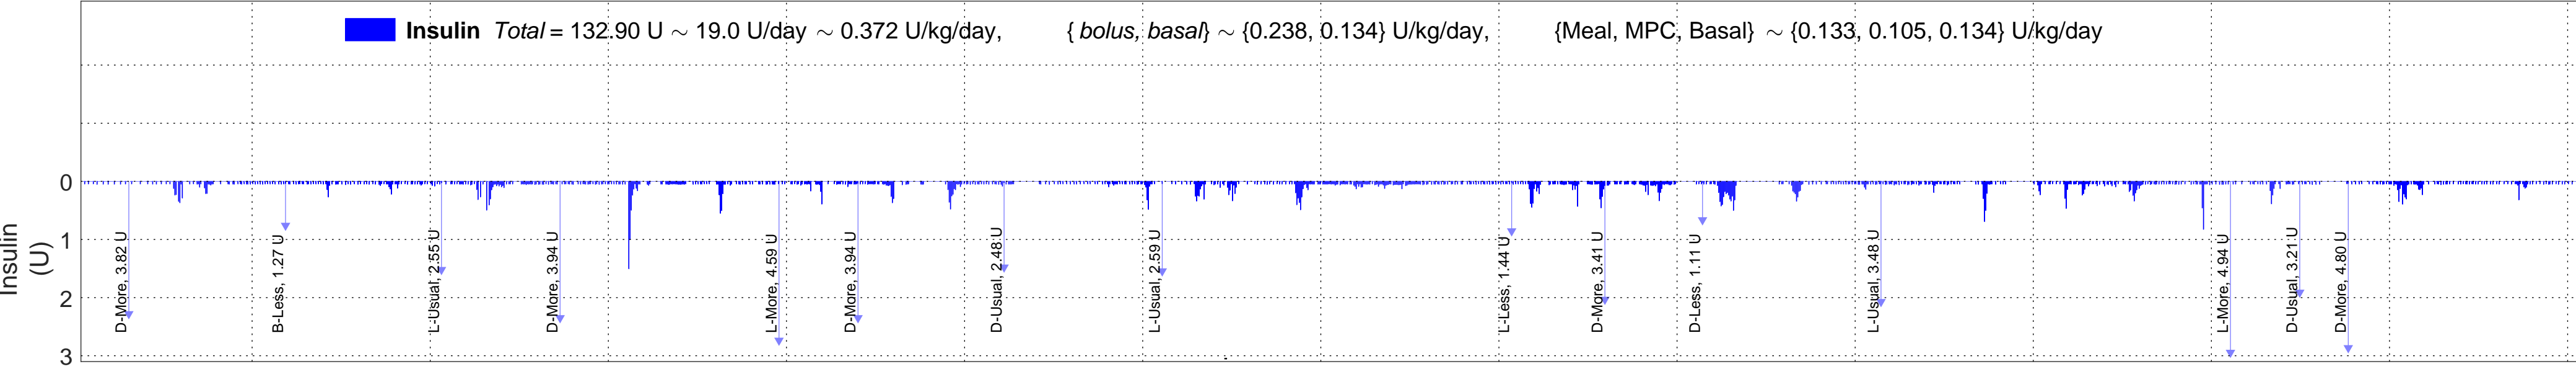

Bionic Pancreas (ID: CF-MGH-17-IP43\_Wk2, BM=51 kg), Insulin Only, 07-Oct-2021 12:38 to 14-Oct-2021 11:43[+7.0]

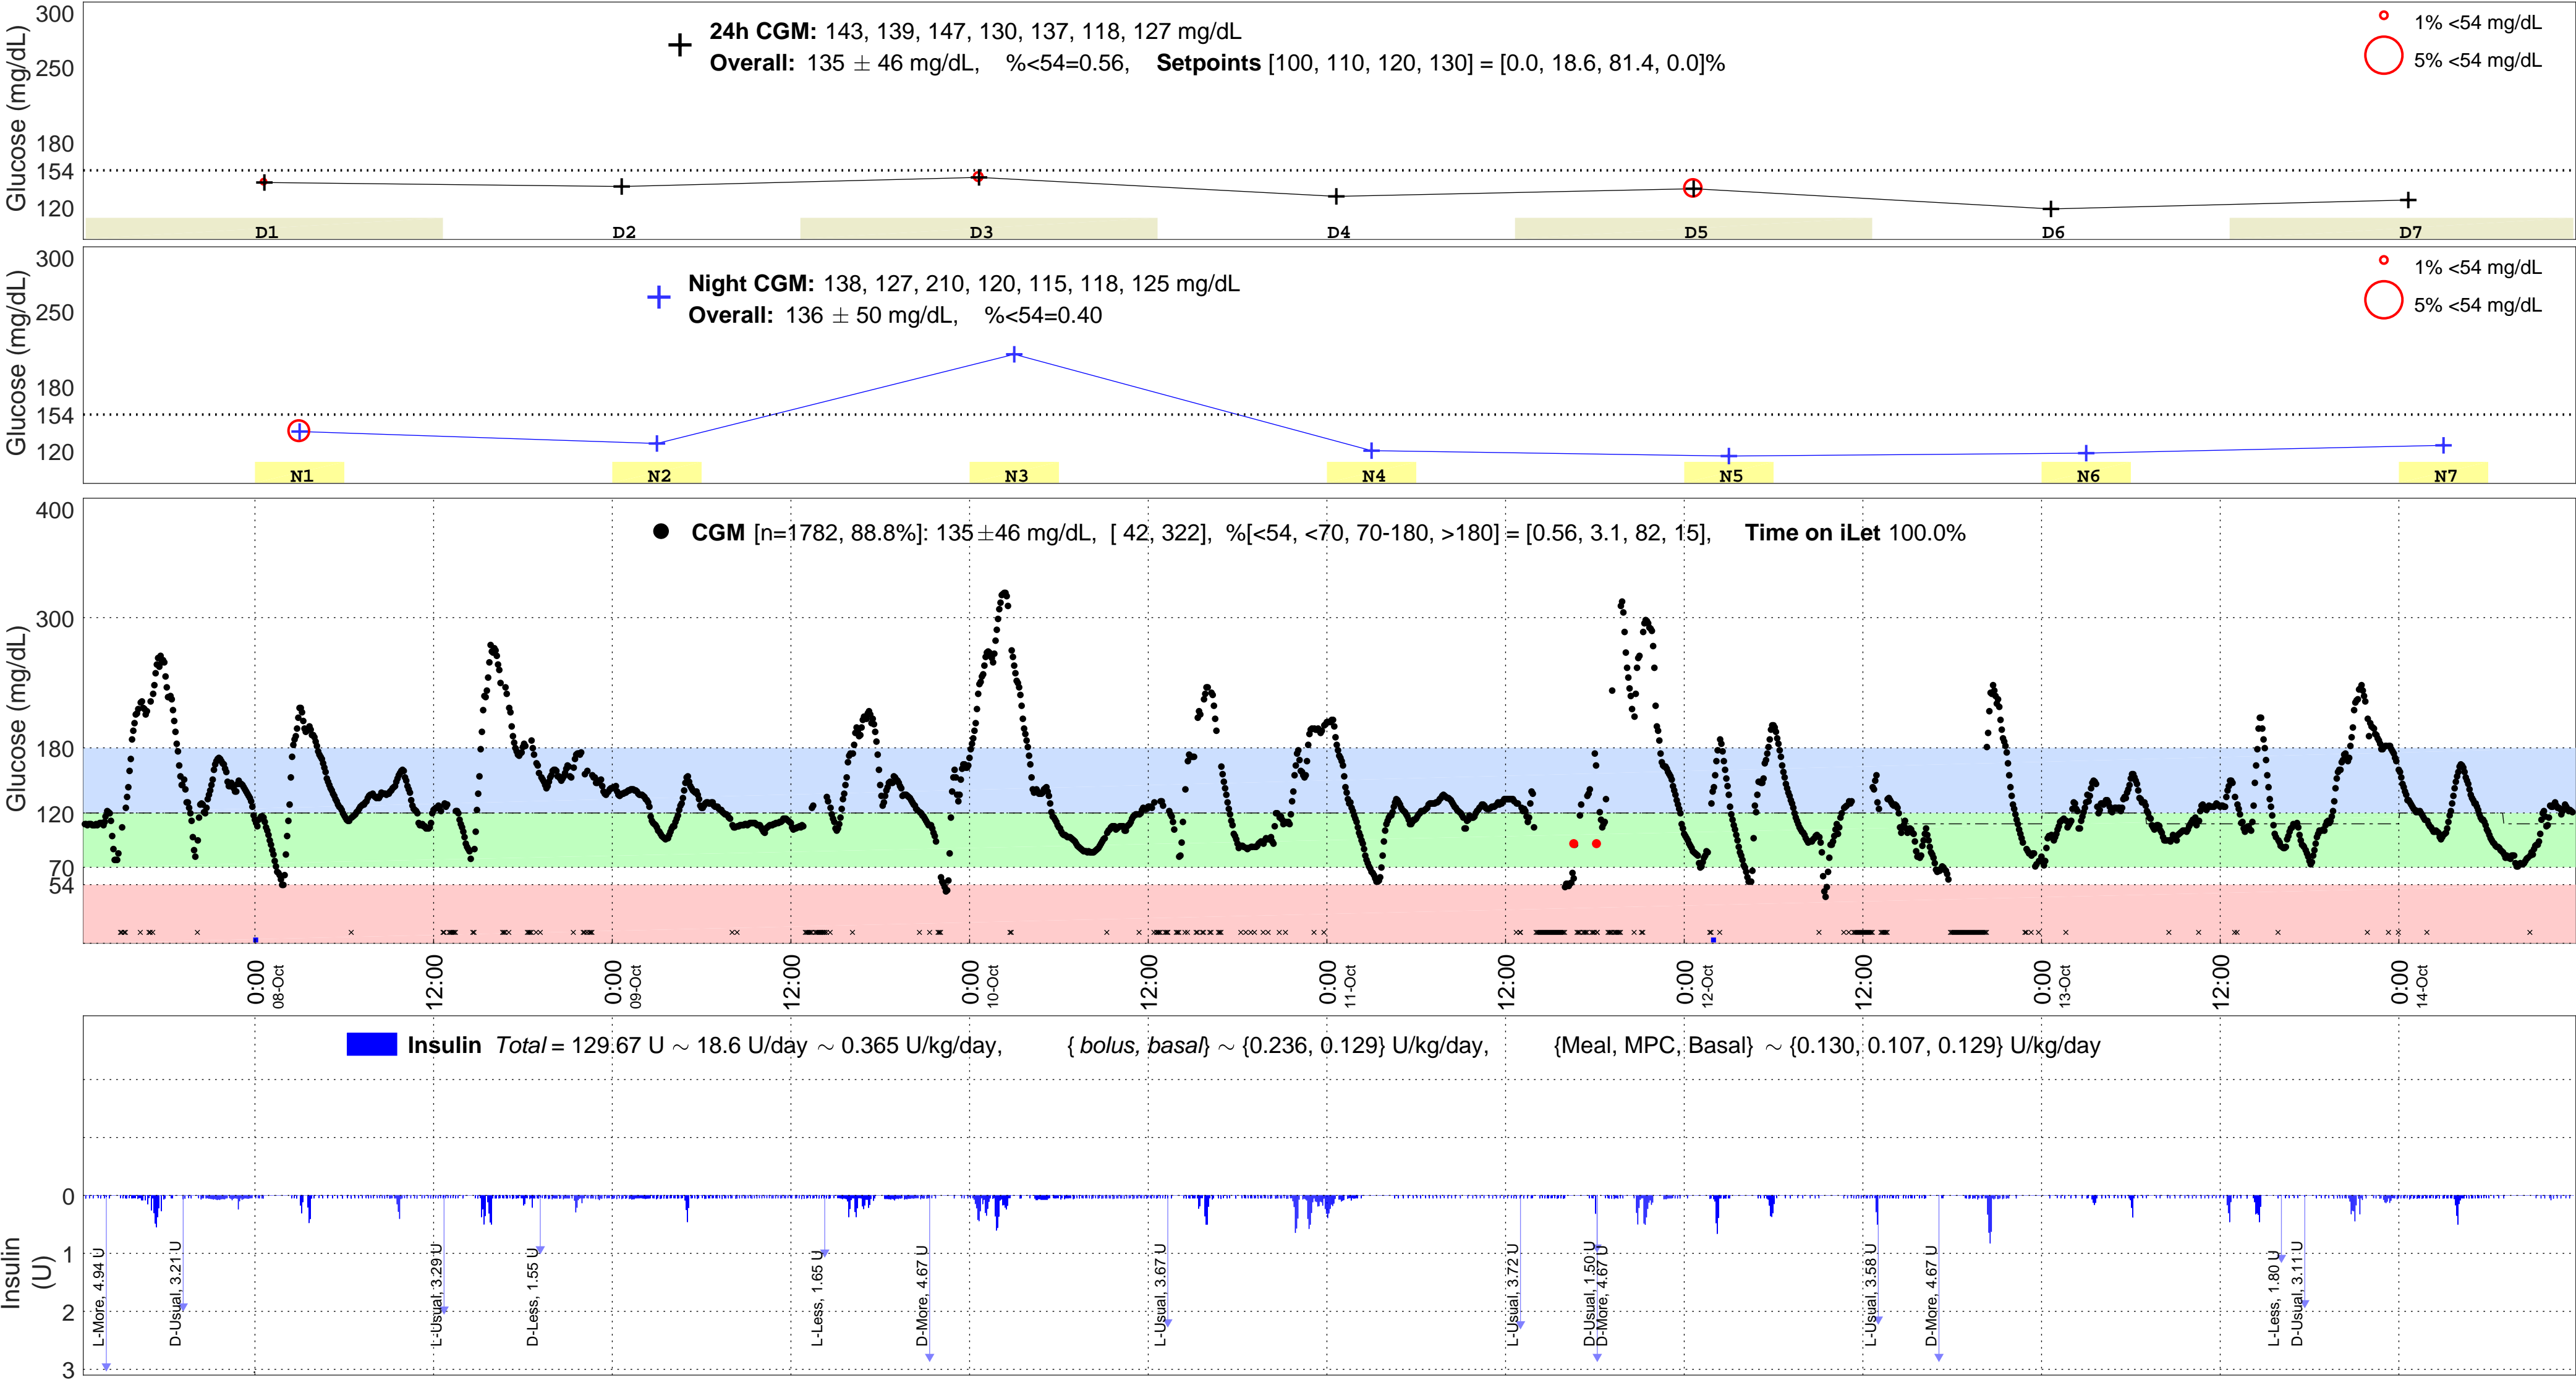

Control (UC-CF-MGH-17\_Wk1), 14-Oct-2021 11:46 to 21-Oct-2021 11:41[+7.0]

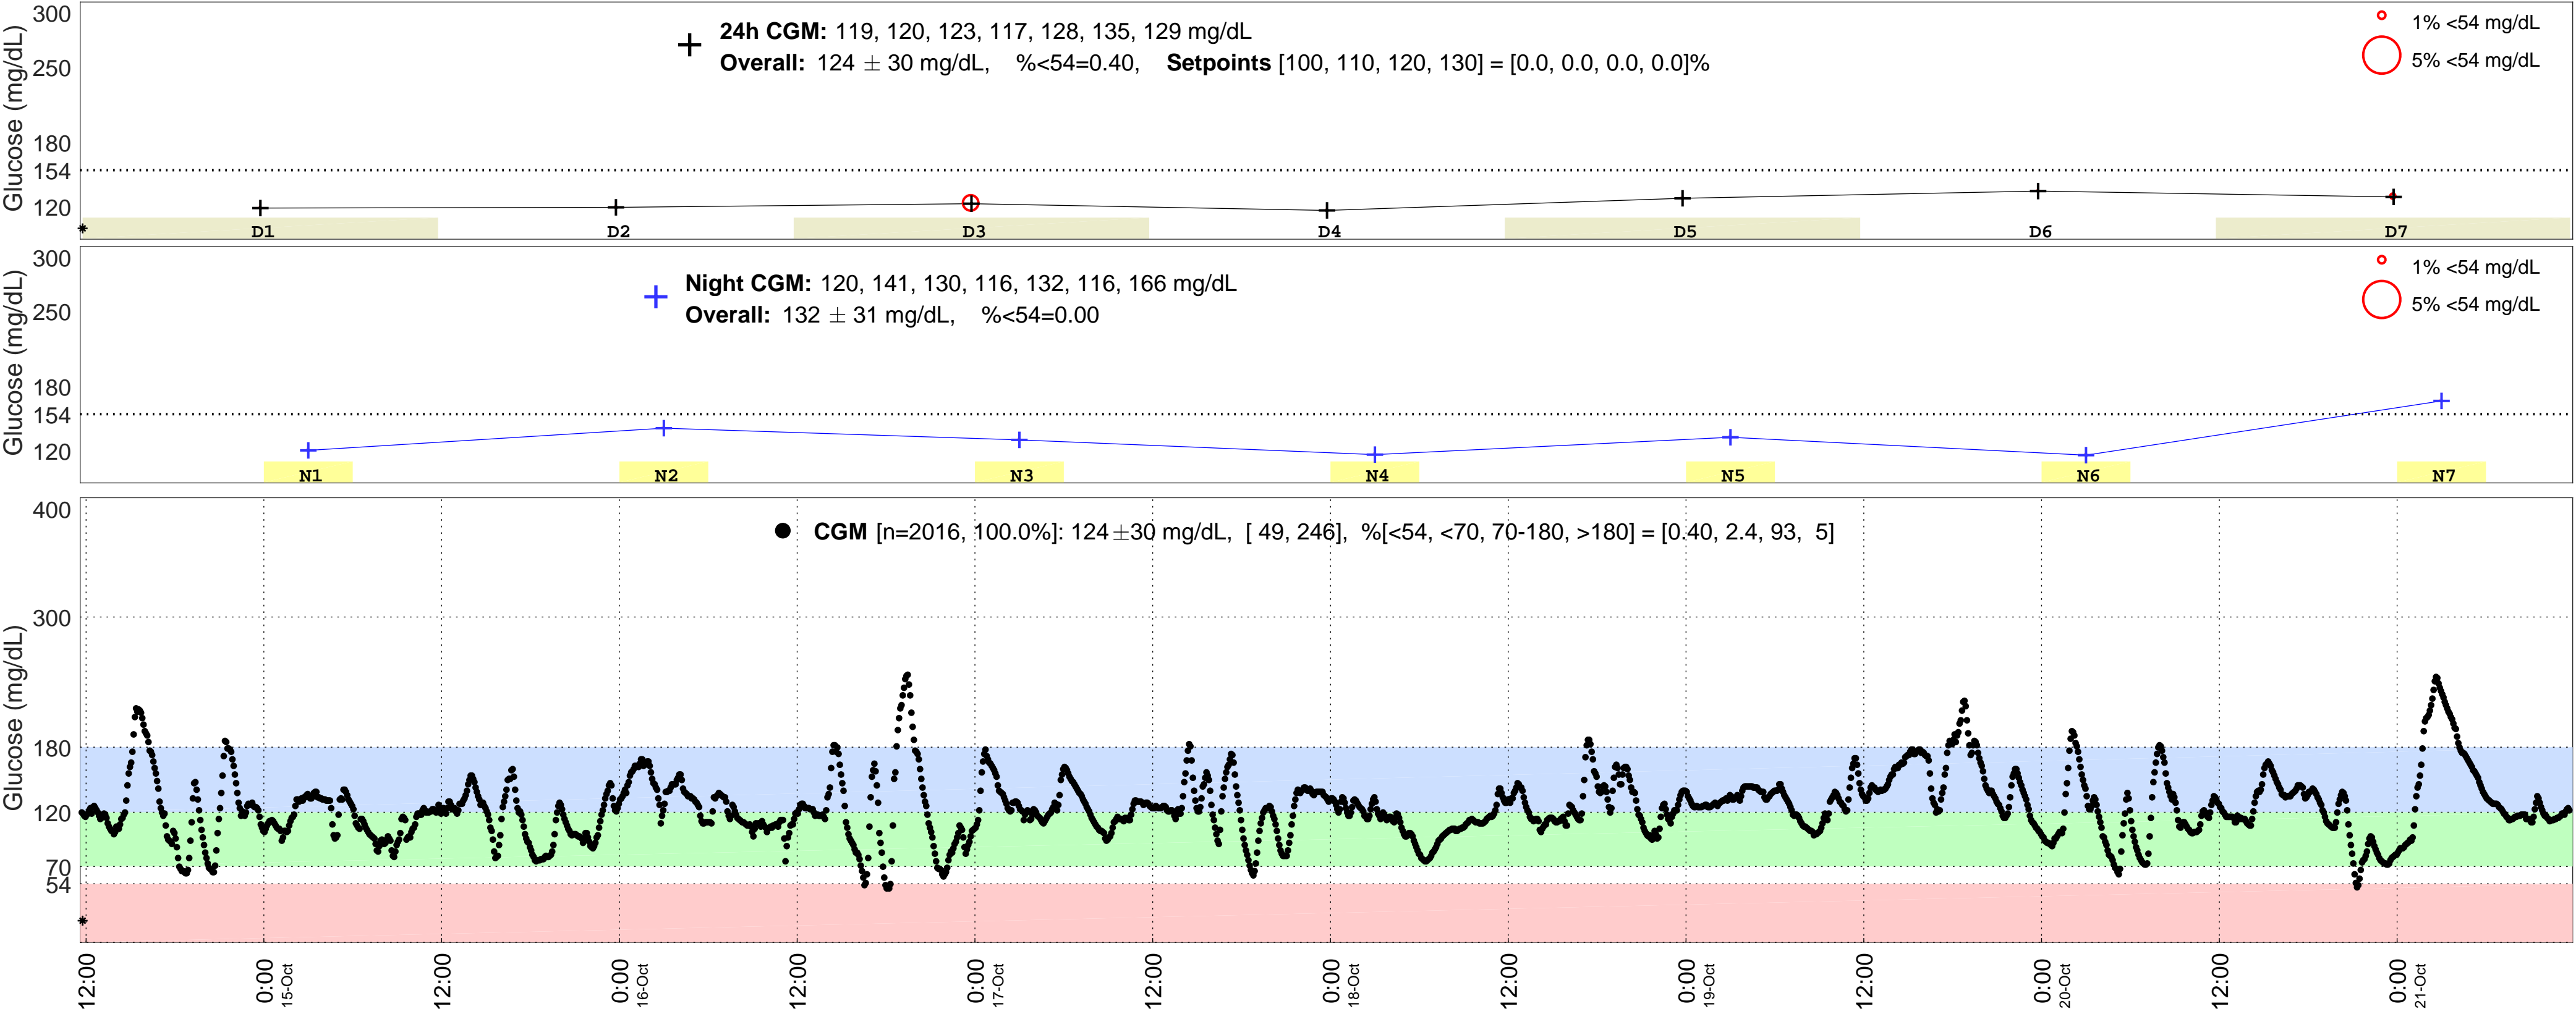

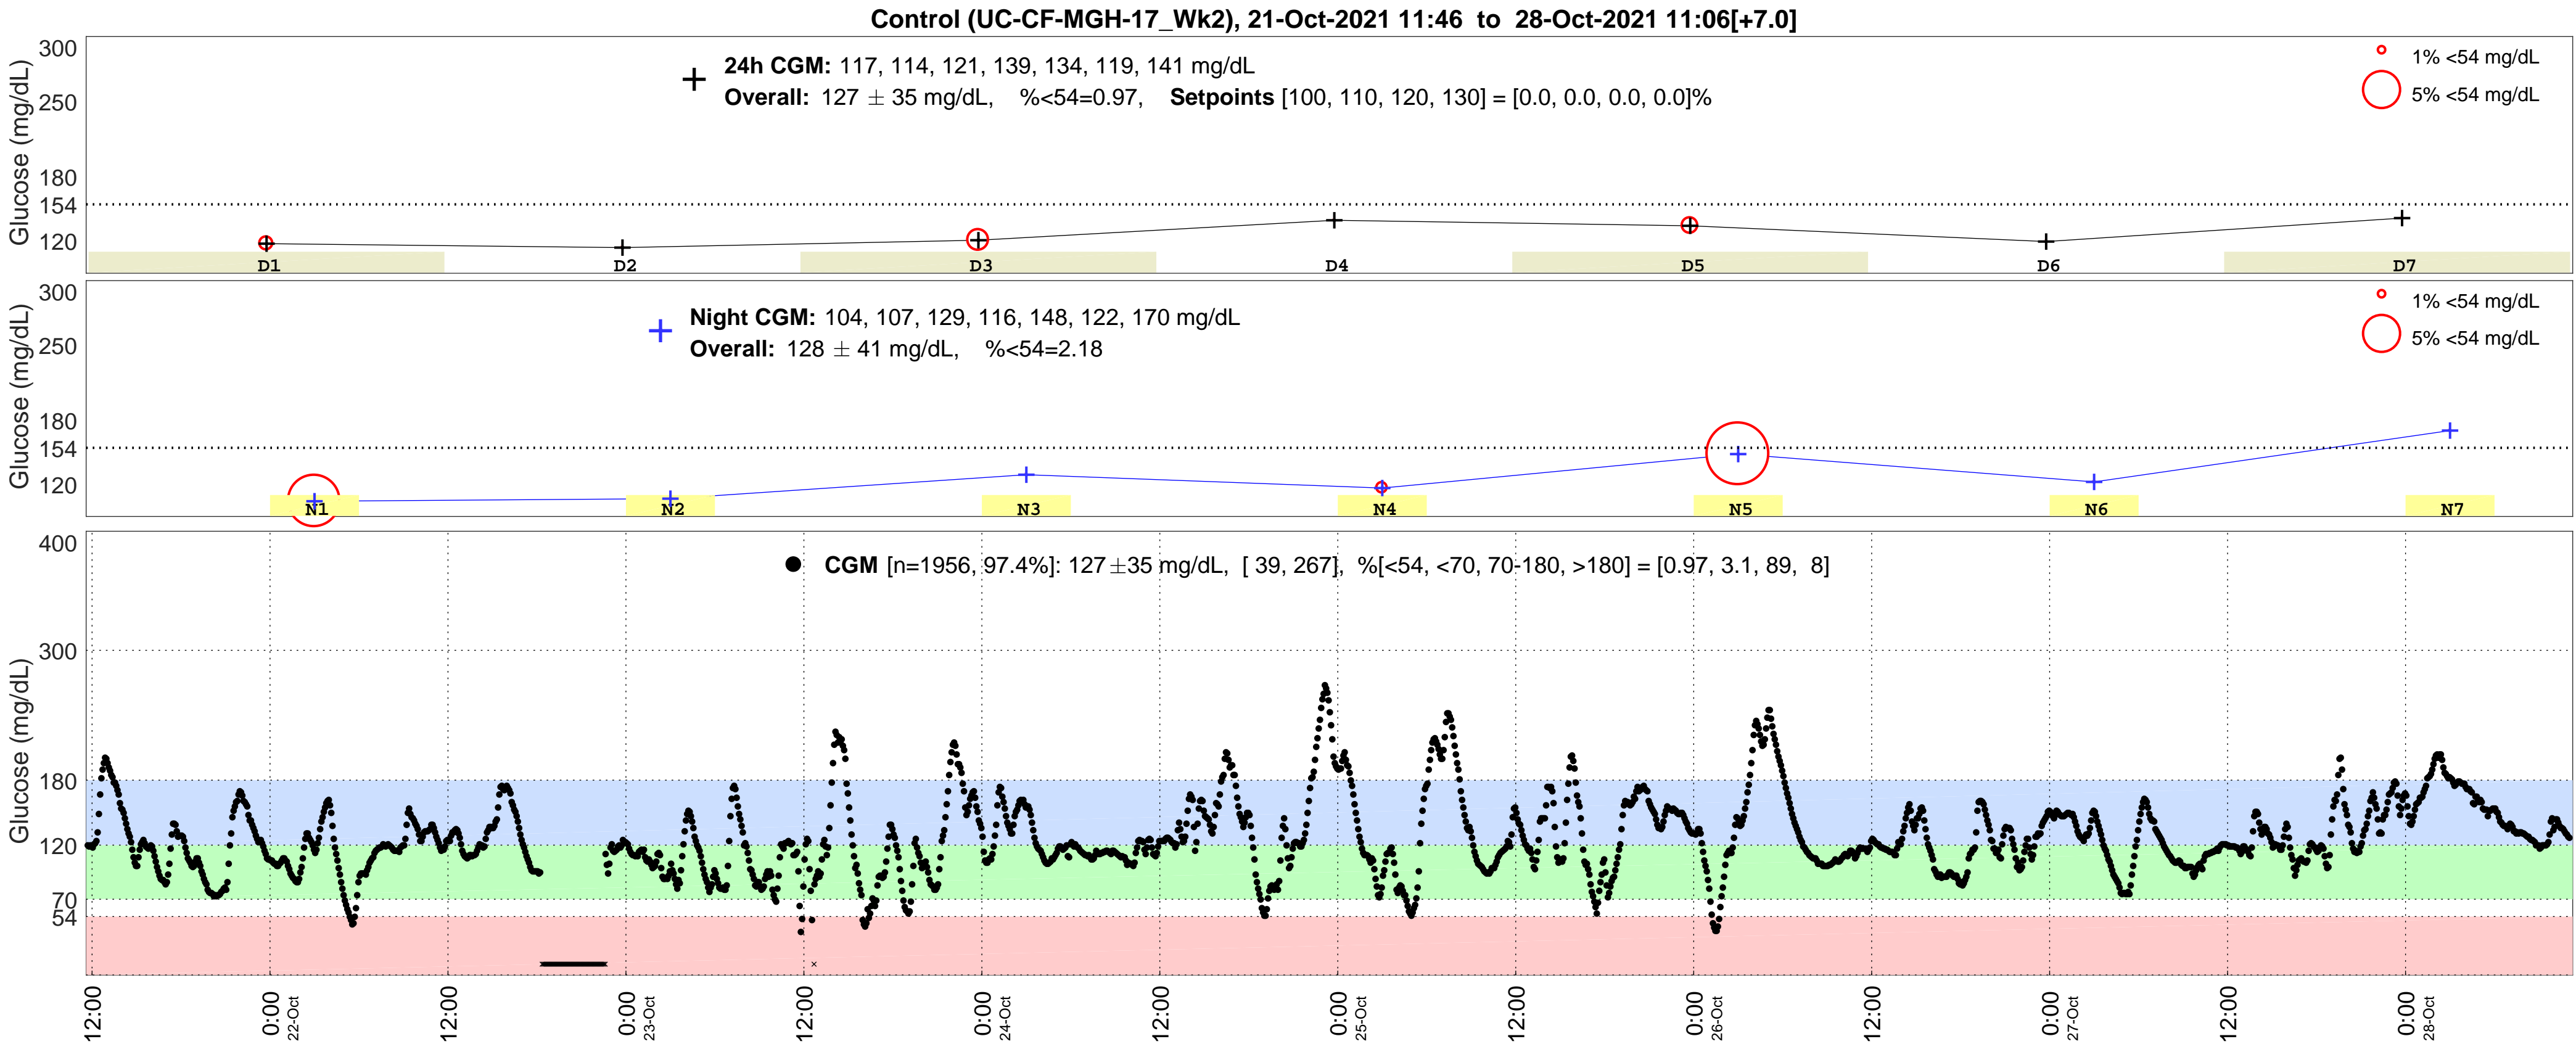



Bionic Pancreas (ID: CF-MGH-18-IM50\_Wk1, BM=84 kg), Insulin Only, 23-Nov-2021 16:29 to 30-Nov-2021 16:24[+7.0]

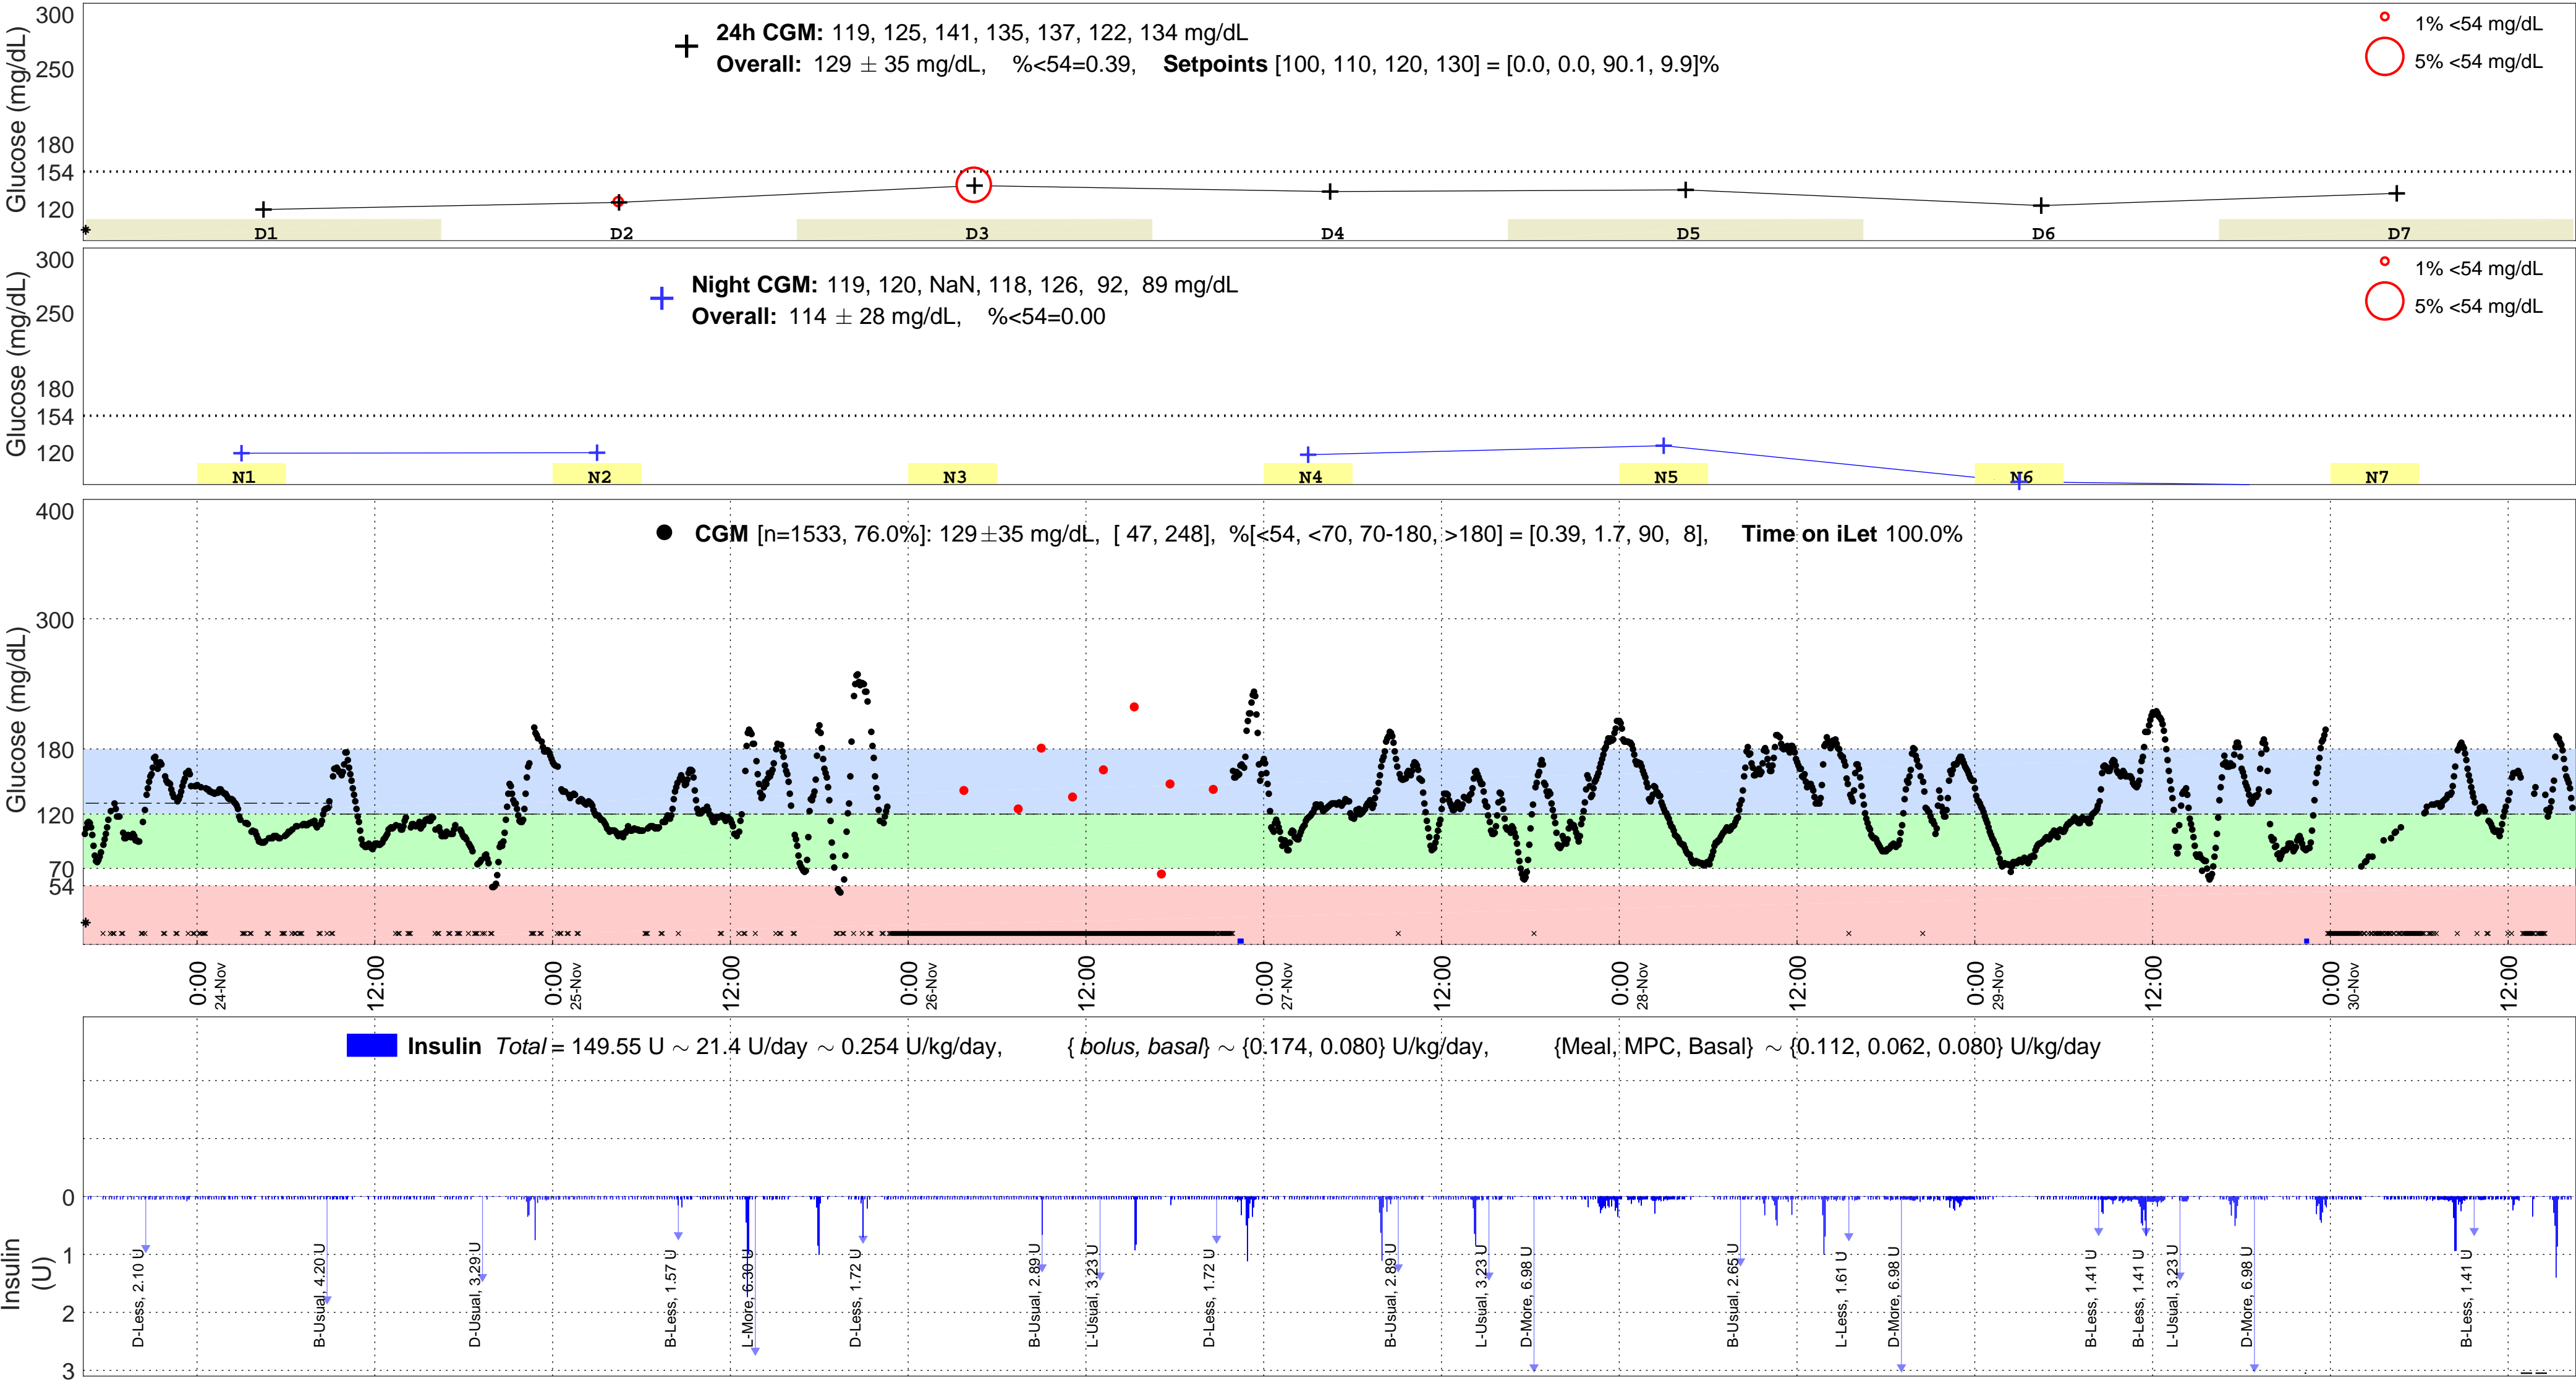

**Bionic Pancreas (ID: CF-MGH-18-IM50\_Wk2, BM=84 kg), Insulin Only, 30-Nov-2021 16:29 to 07-Dec-2021 15:04[+6.9]**

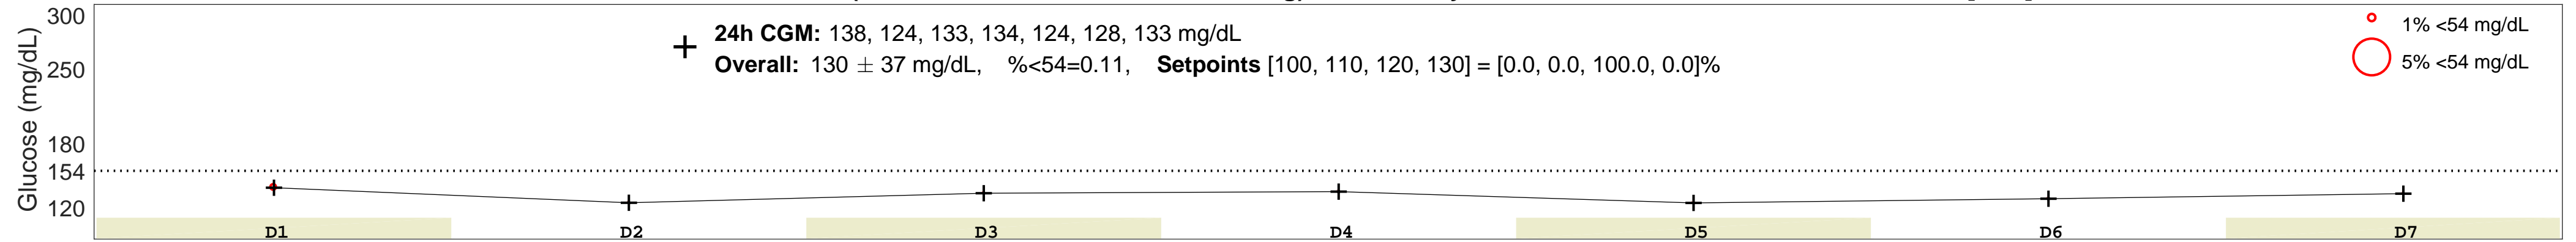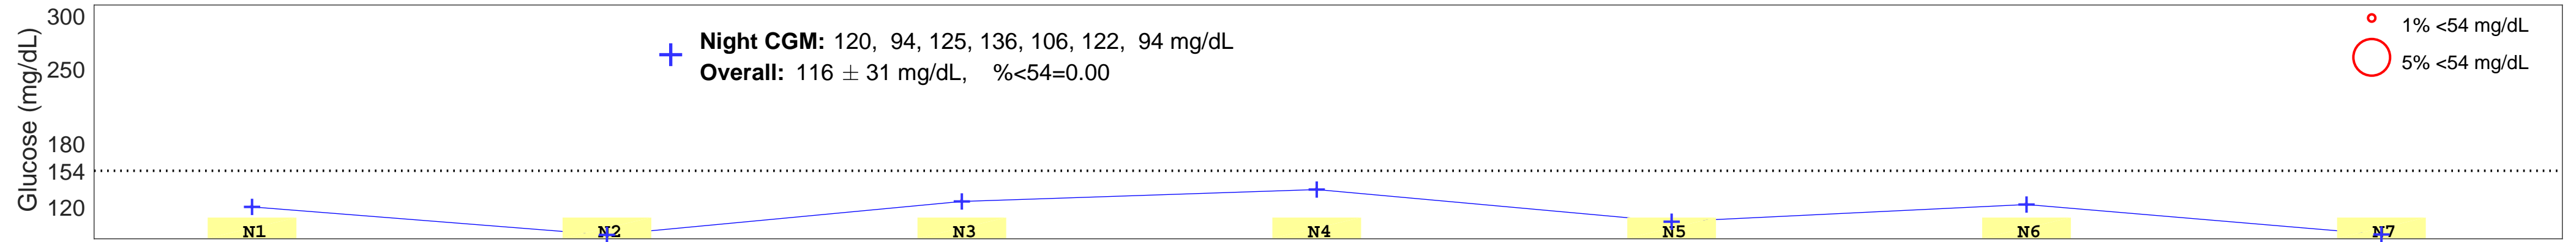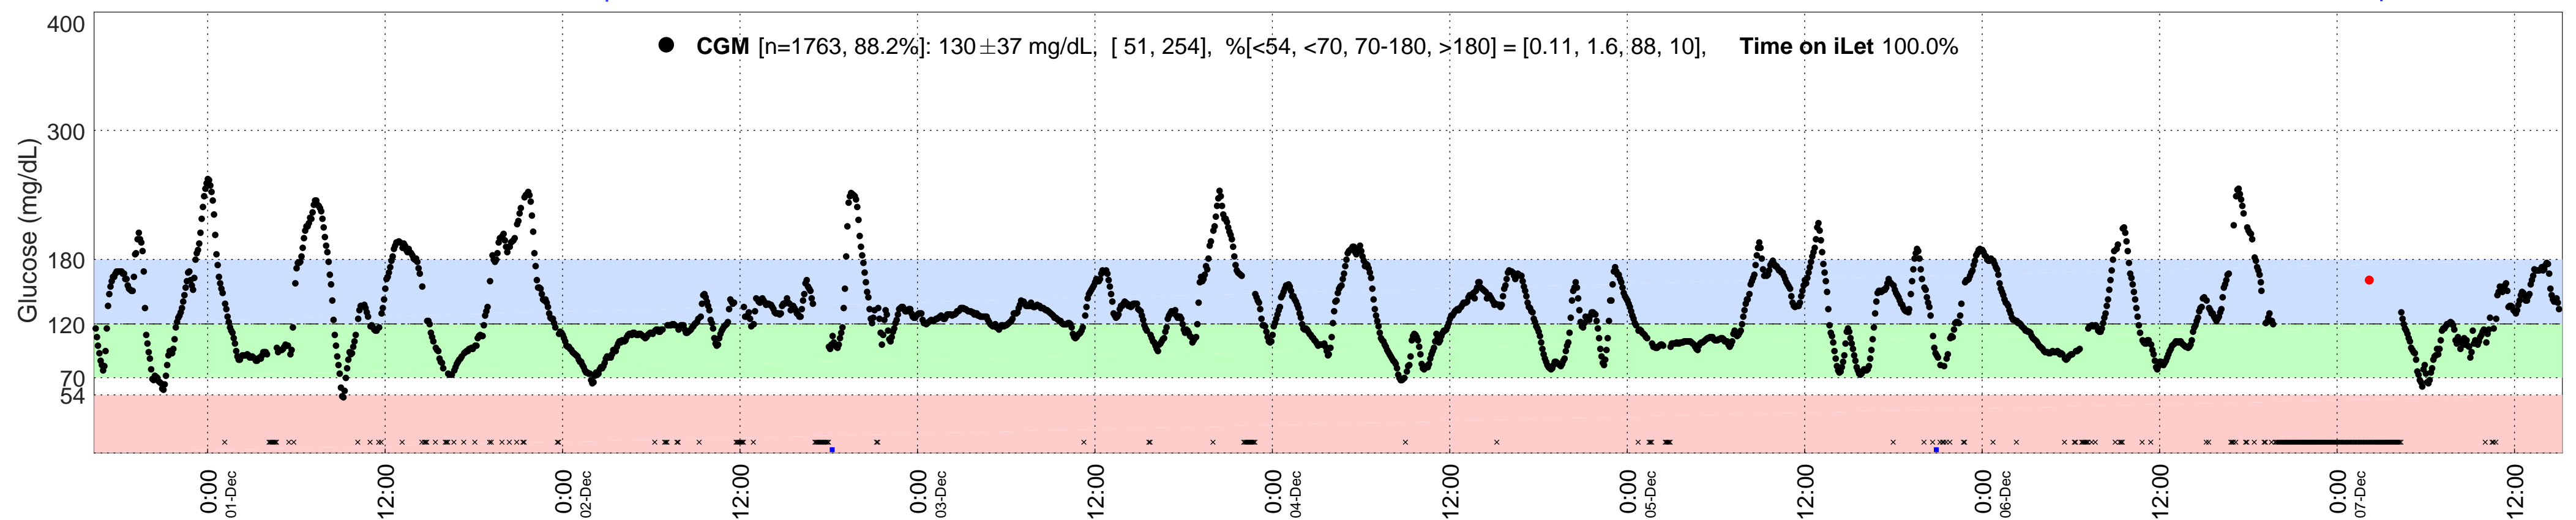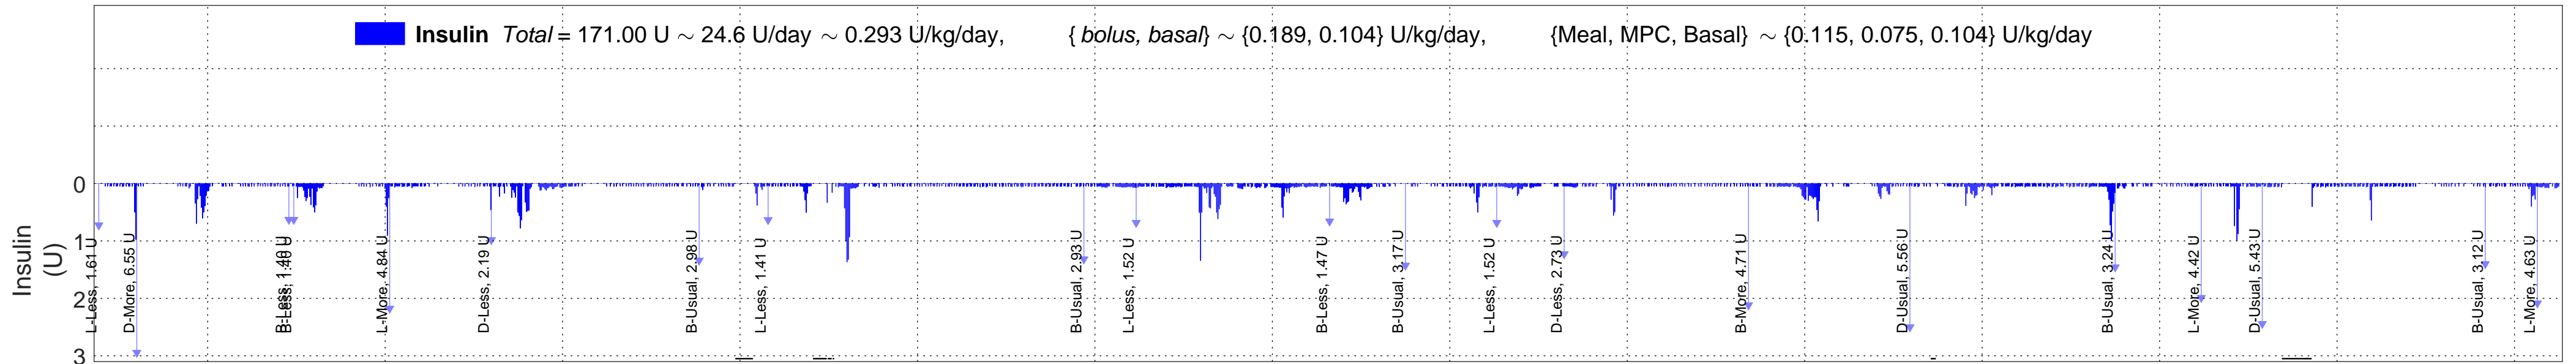

Control (UC-CF-MGH-18\_Wk1), 07-Dec-2021 15:05 to 14-Dec-2021 15:01[+7.0]

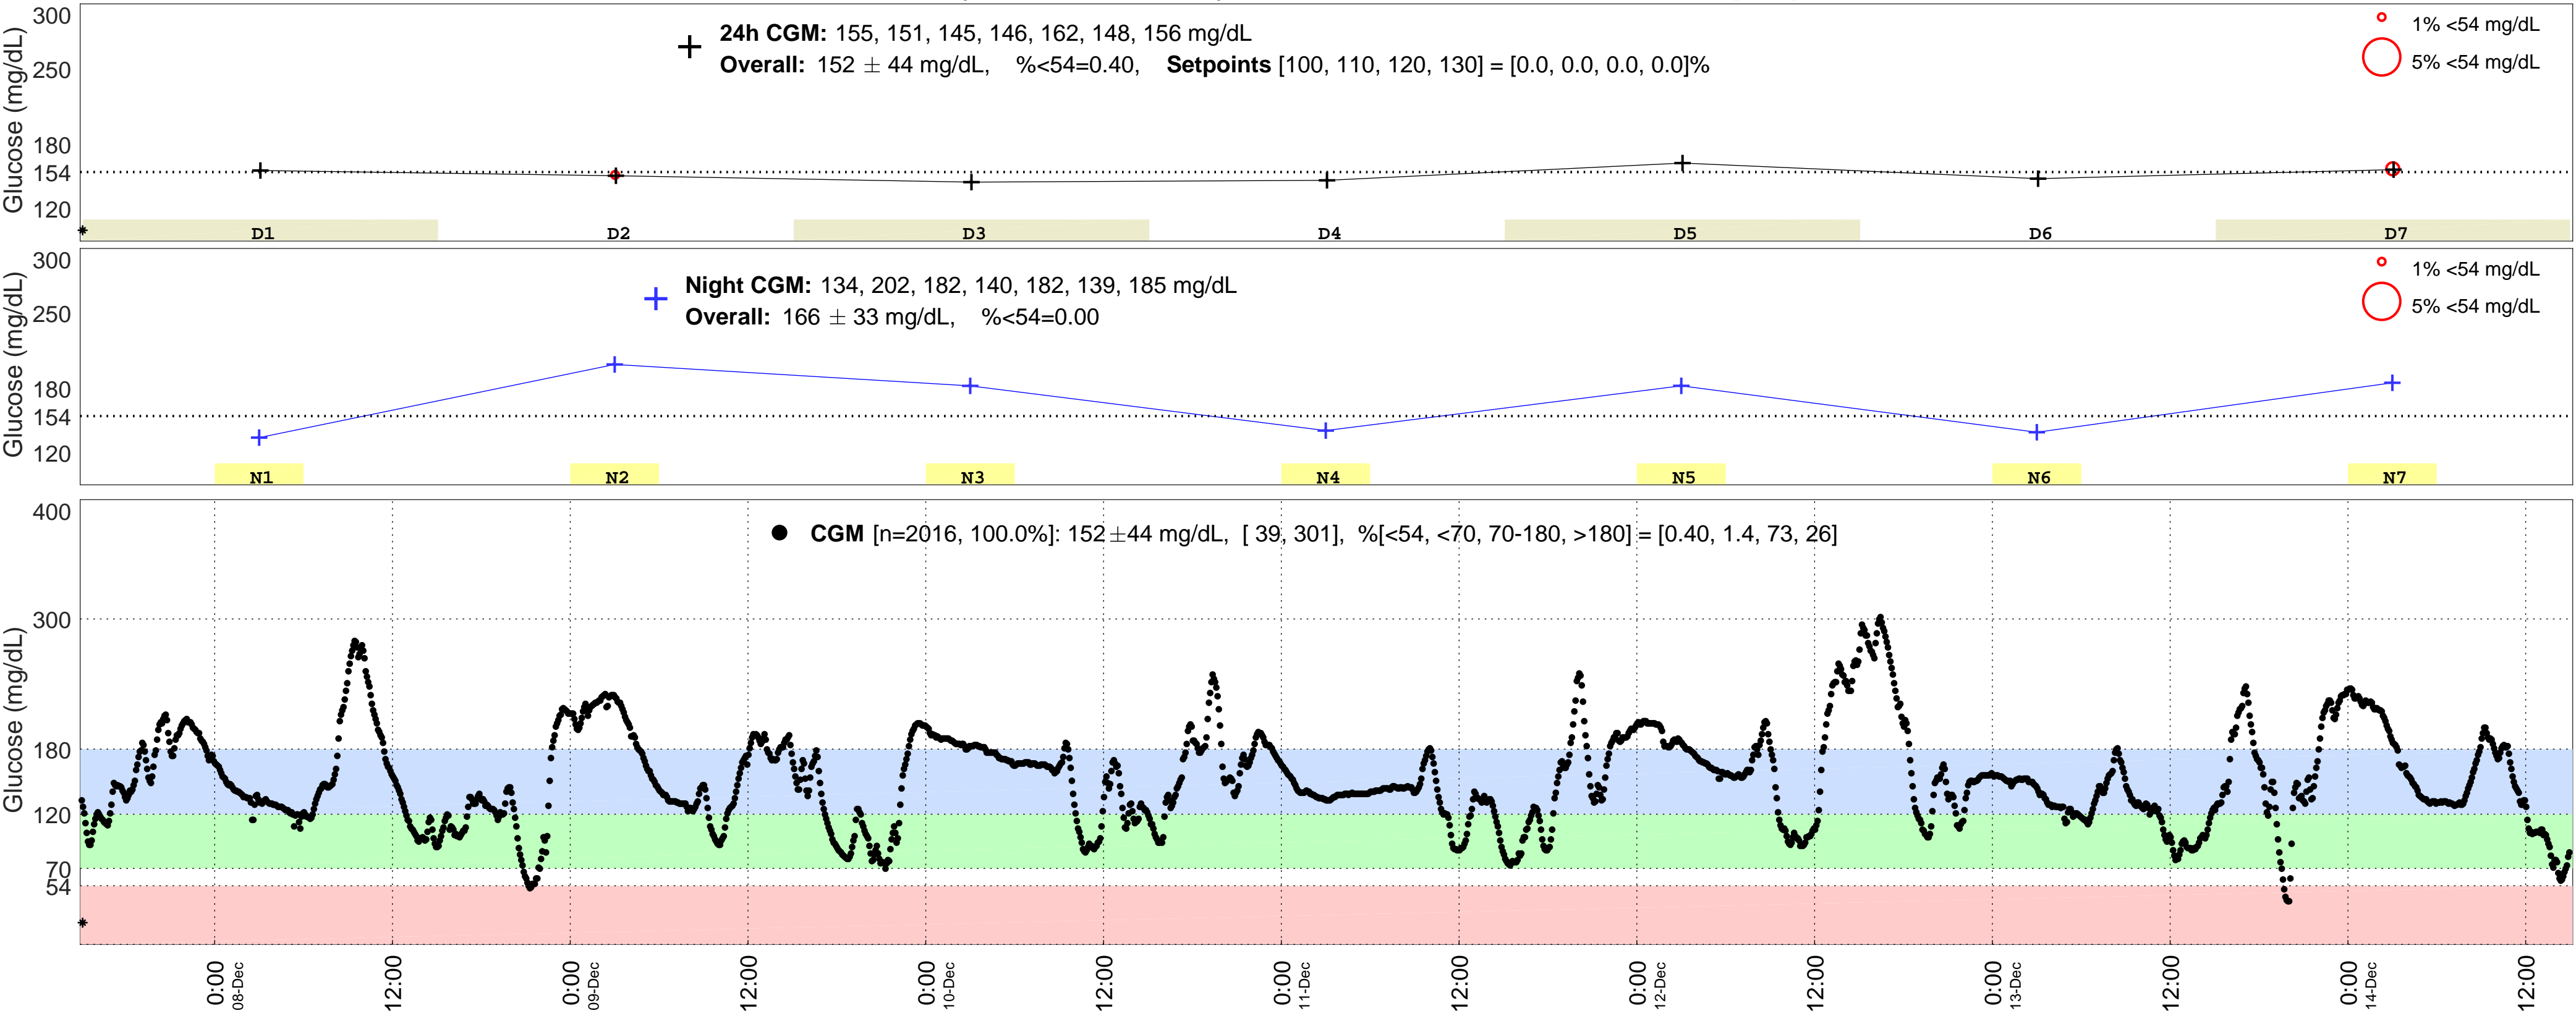

Control (UC-CF-MGH-18\_Wk2), 14-Dec-2021 15:06 to 21-Dec-2021 14:41[+7.0]

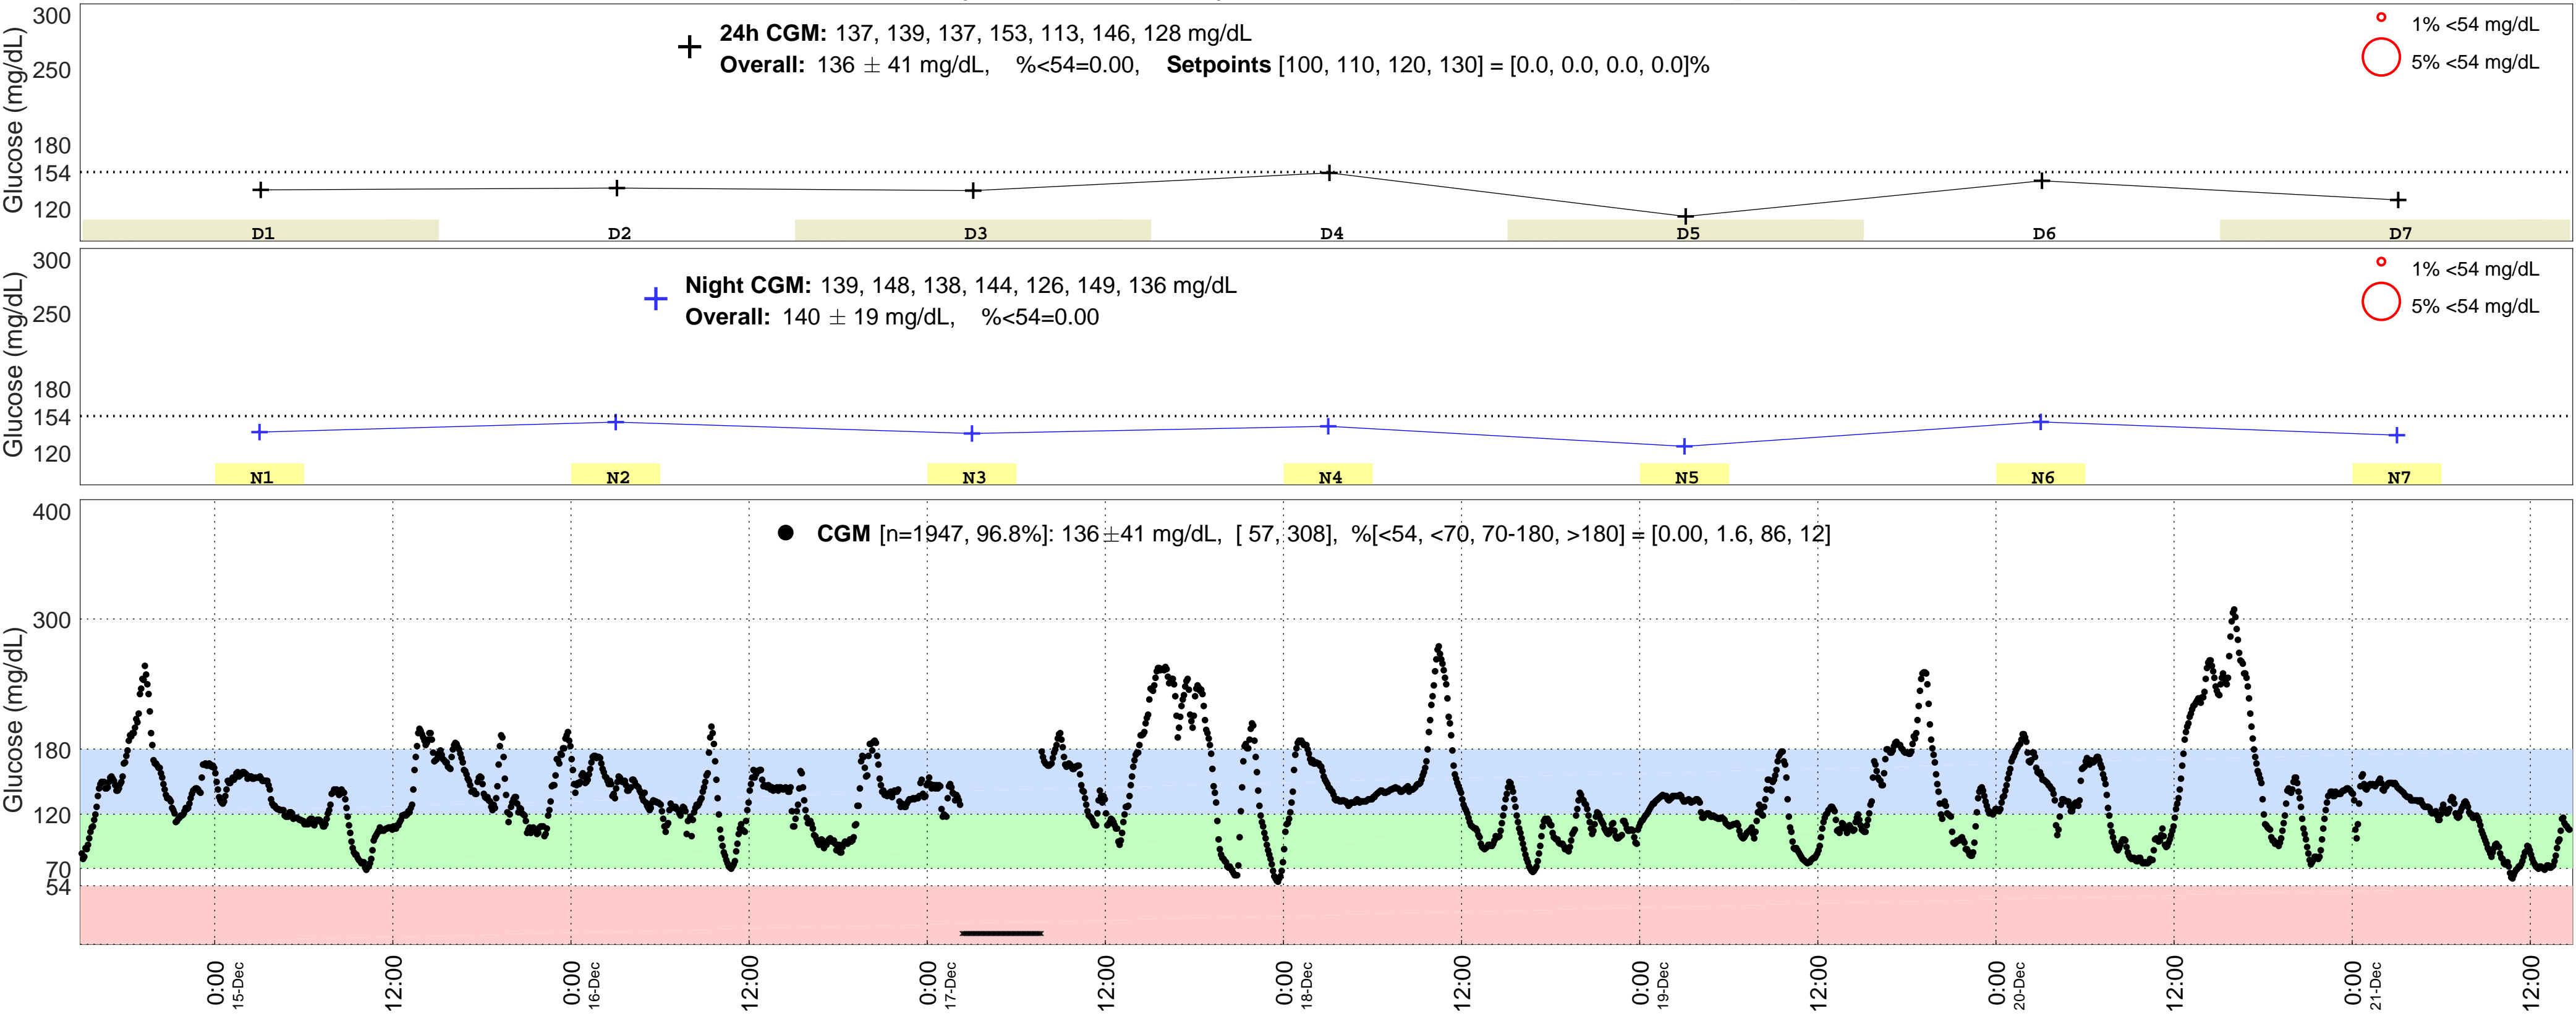

Bionic Pancreas (ID: CF-MGH-19-IP25\_Wk1, BM=80 kg), Insulin Only, 01-Nov-2021 10:13 to 08-Nov-2021 09:08[+7.0]

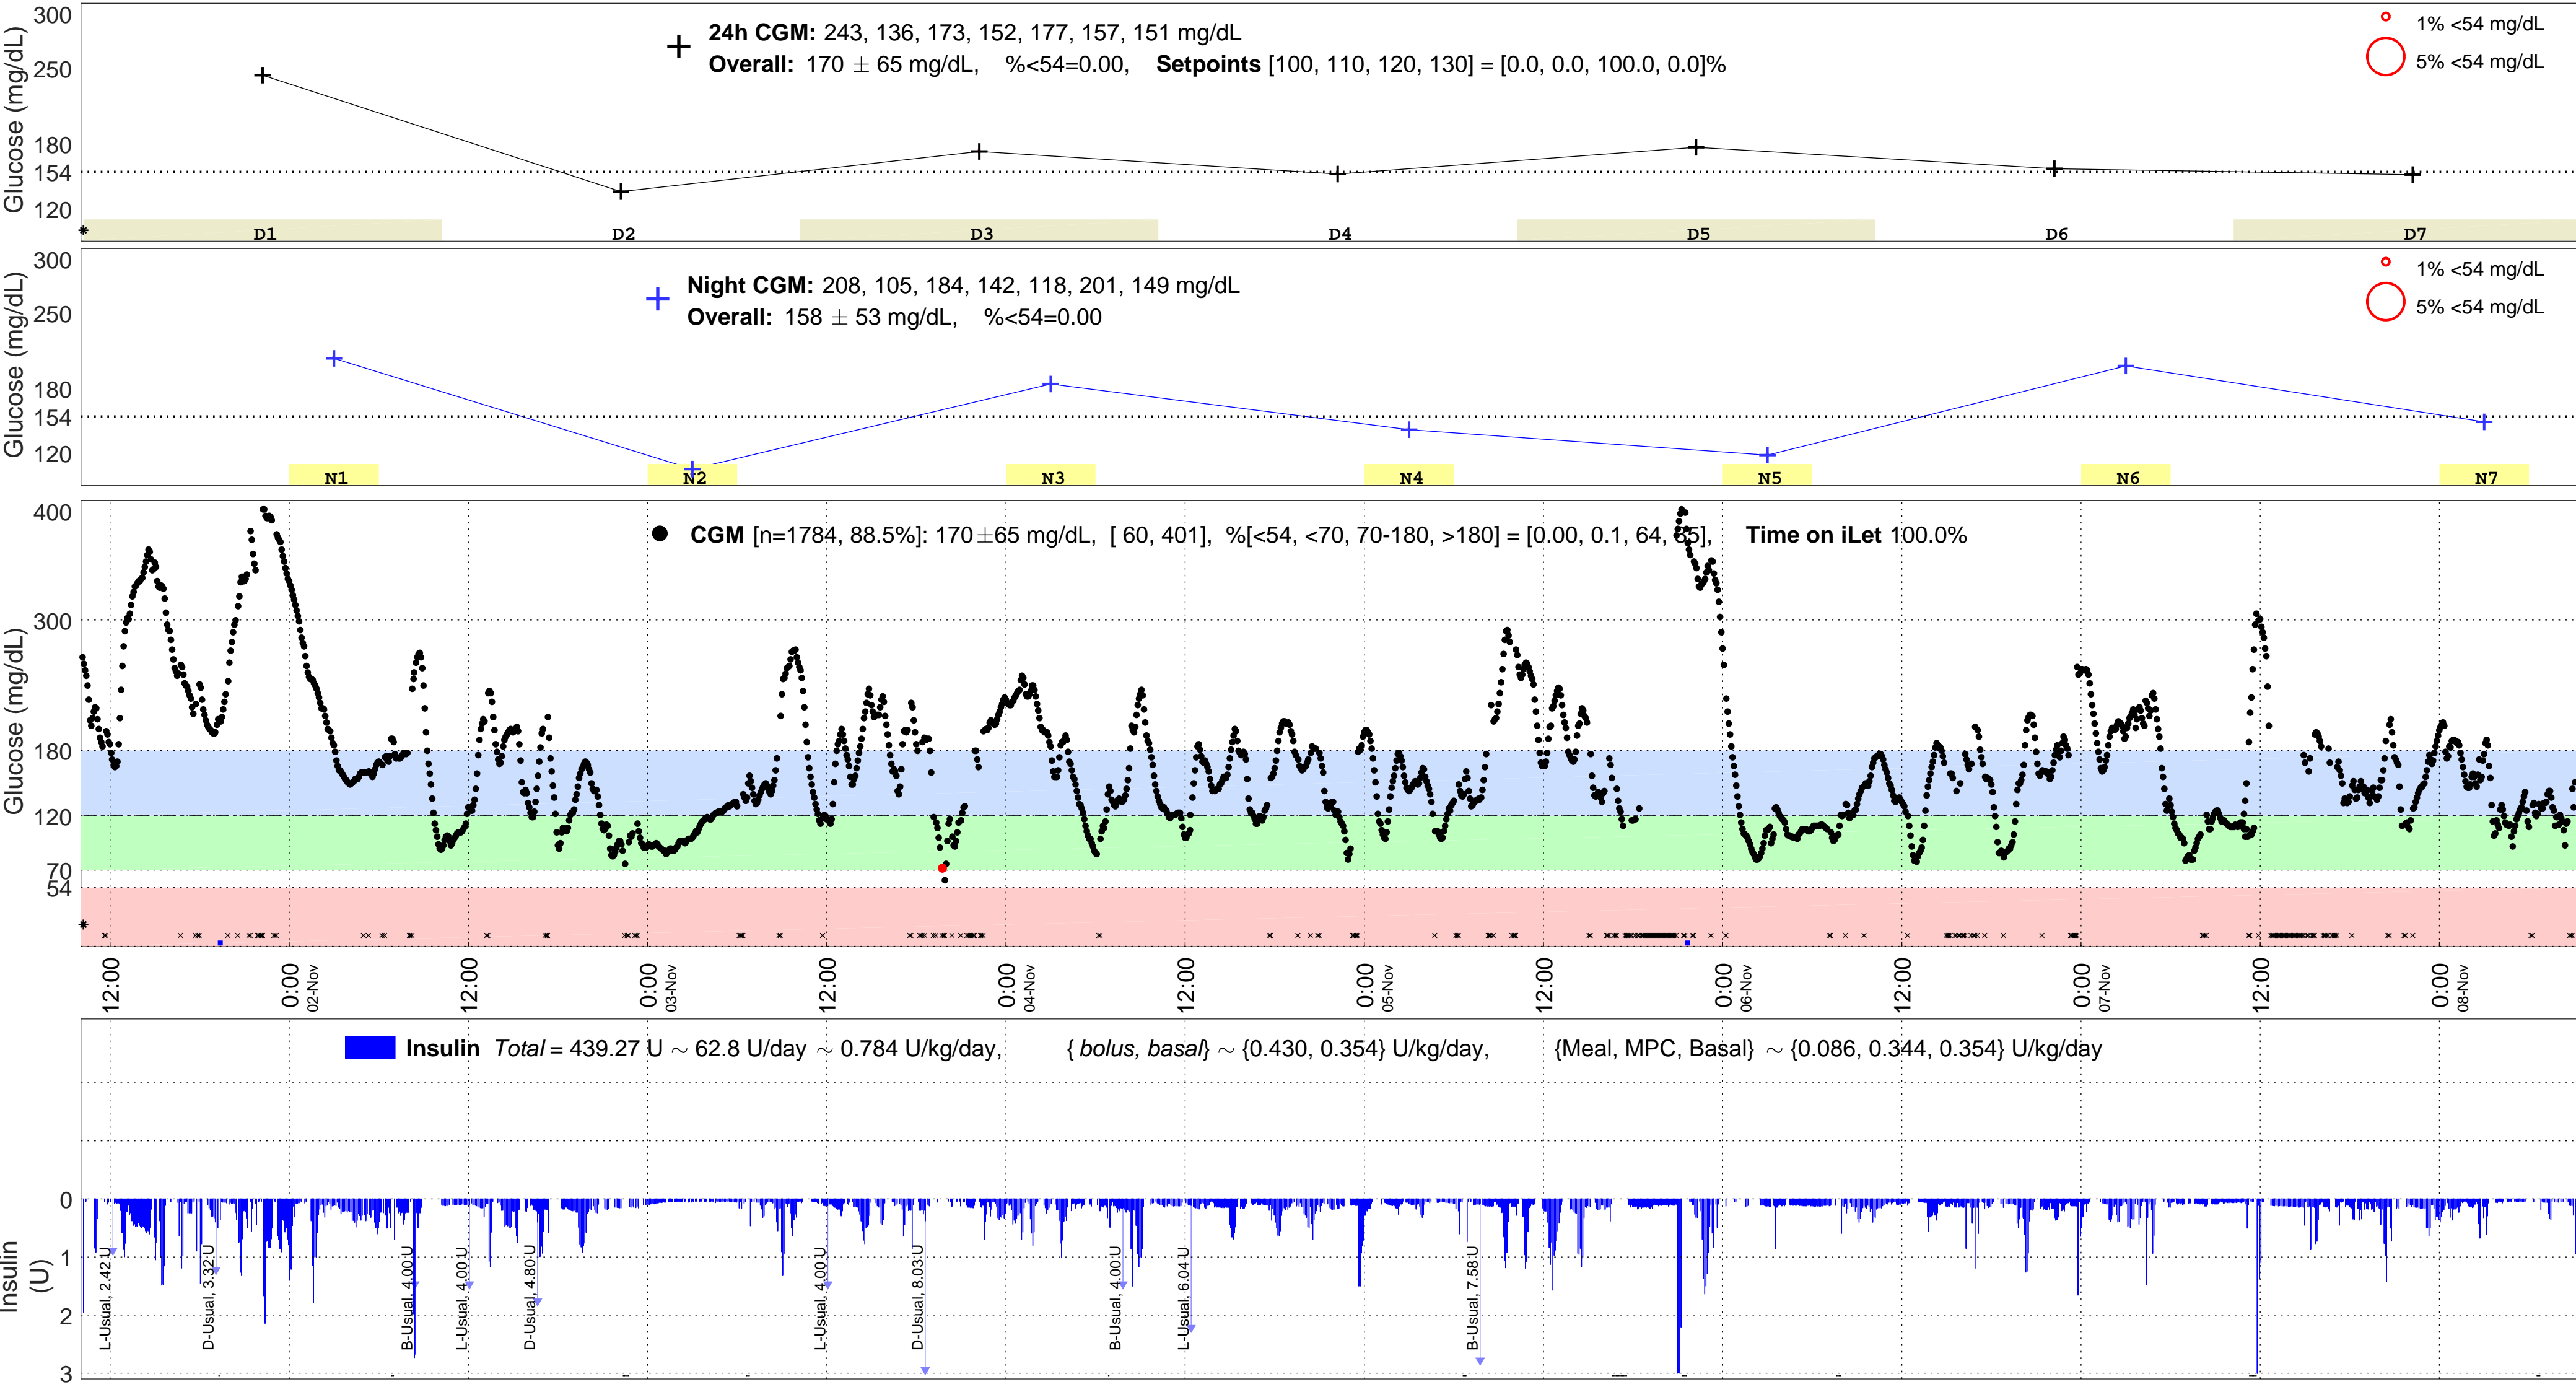



Bionic Pancreas (ID: CF-MGH-19-IP25\_Wk2, BM=80 kg), Insulin Only, 08-Nov-2021 09:13 to 15-Nov-2021 08:08[+7.0]

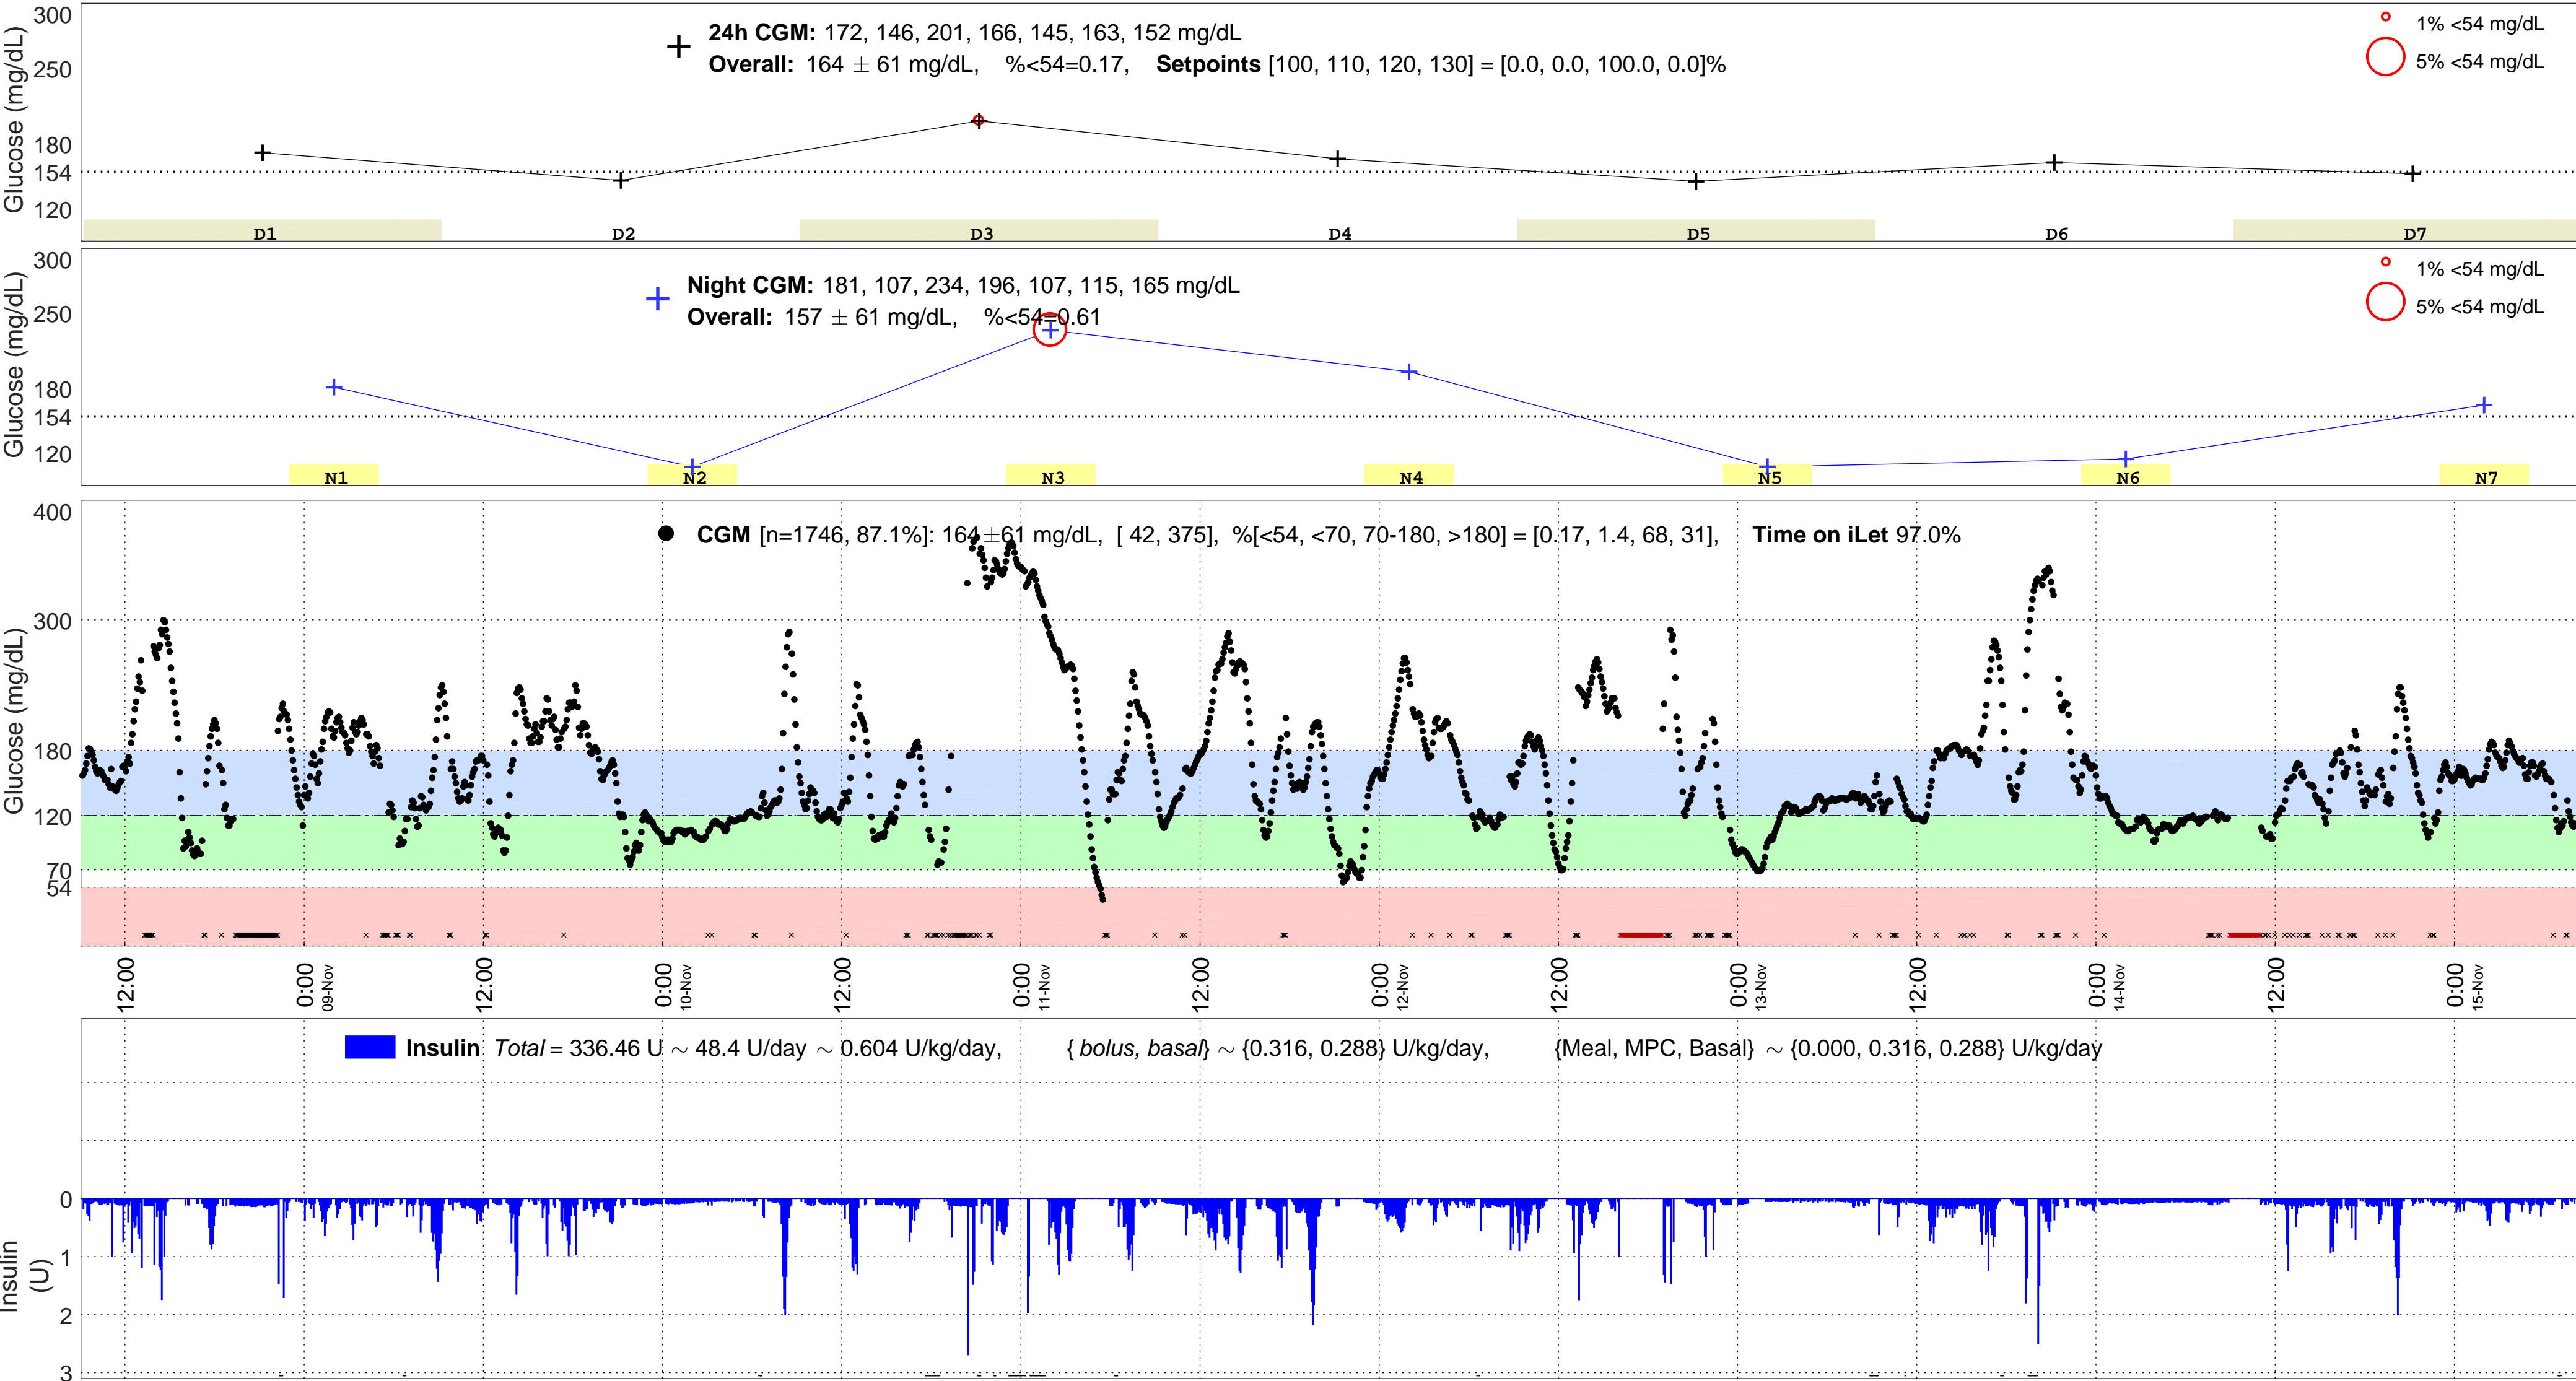

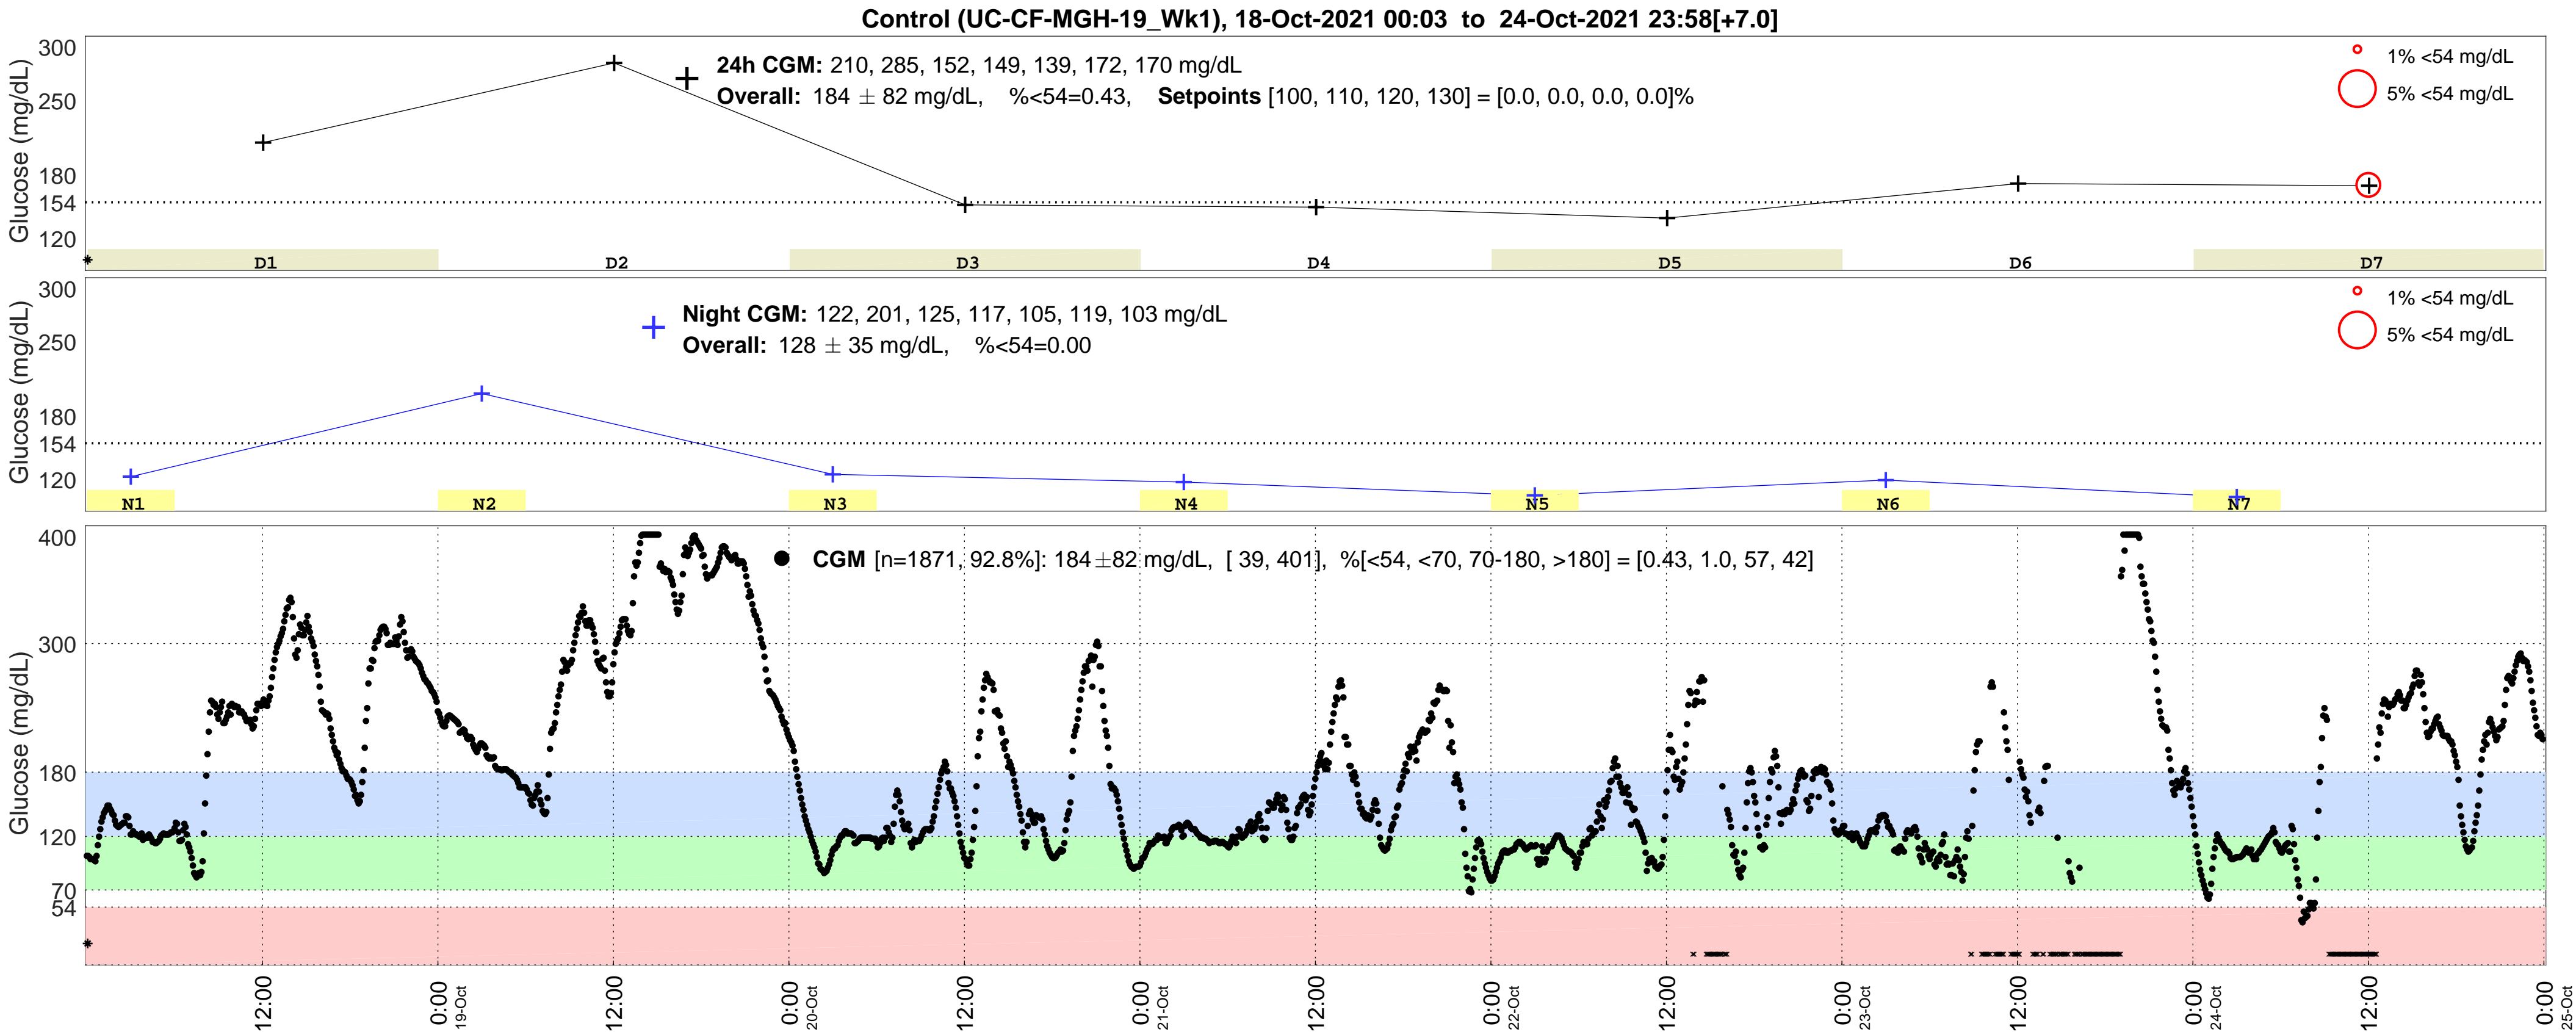

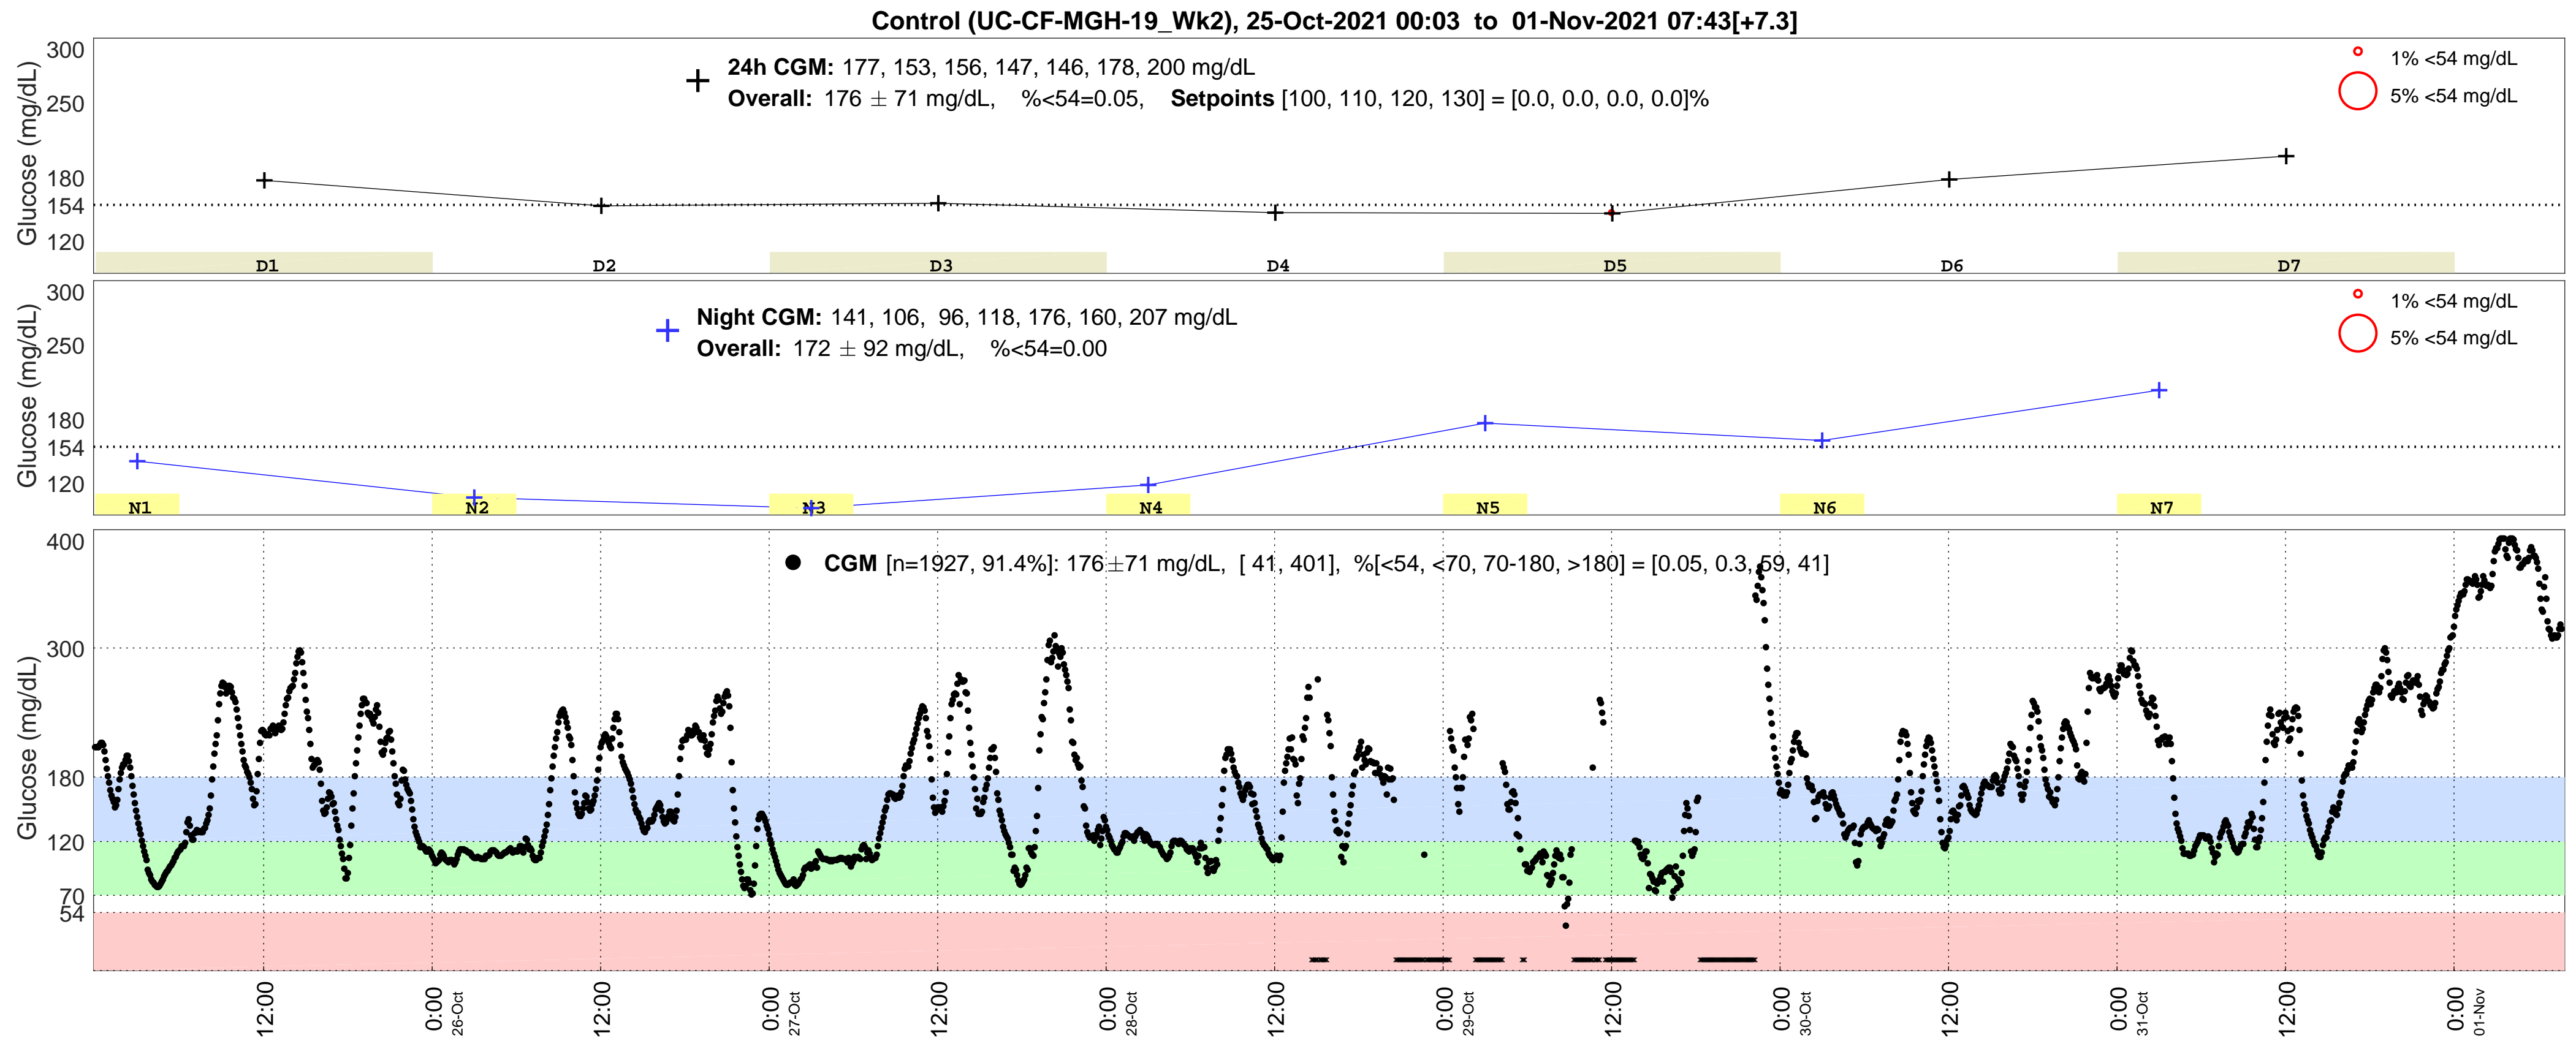

Bionic Pancreas (ID: CF-MGH-22-IM24\_Wk1, BM=48 kg), Insulin Only, 28-Dec-2021 17:40 to 04-Jan-2022 17:35[+7.0]

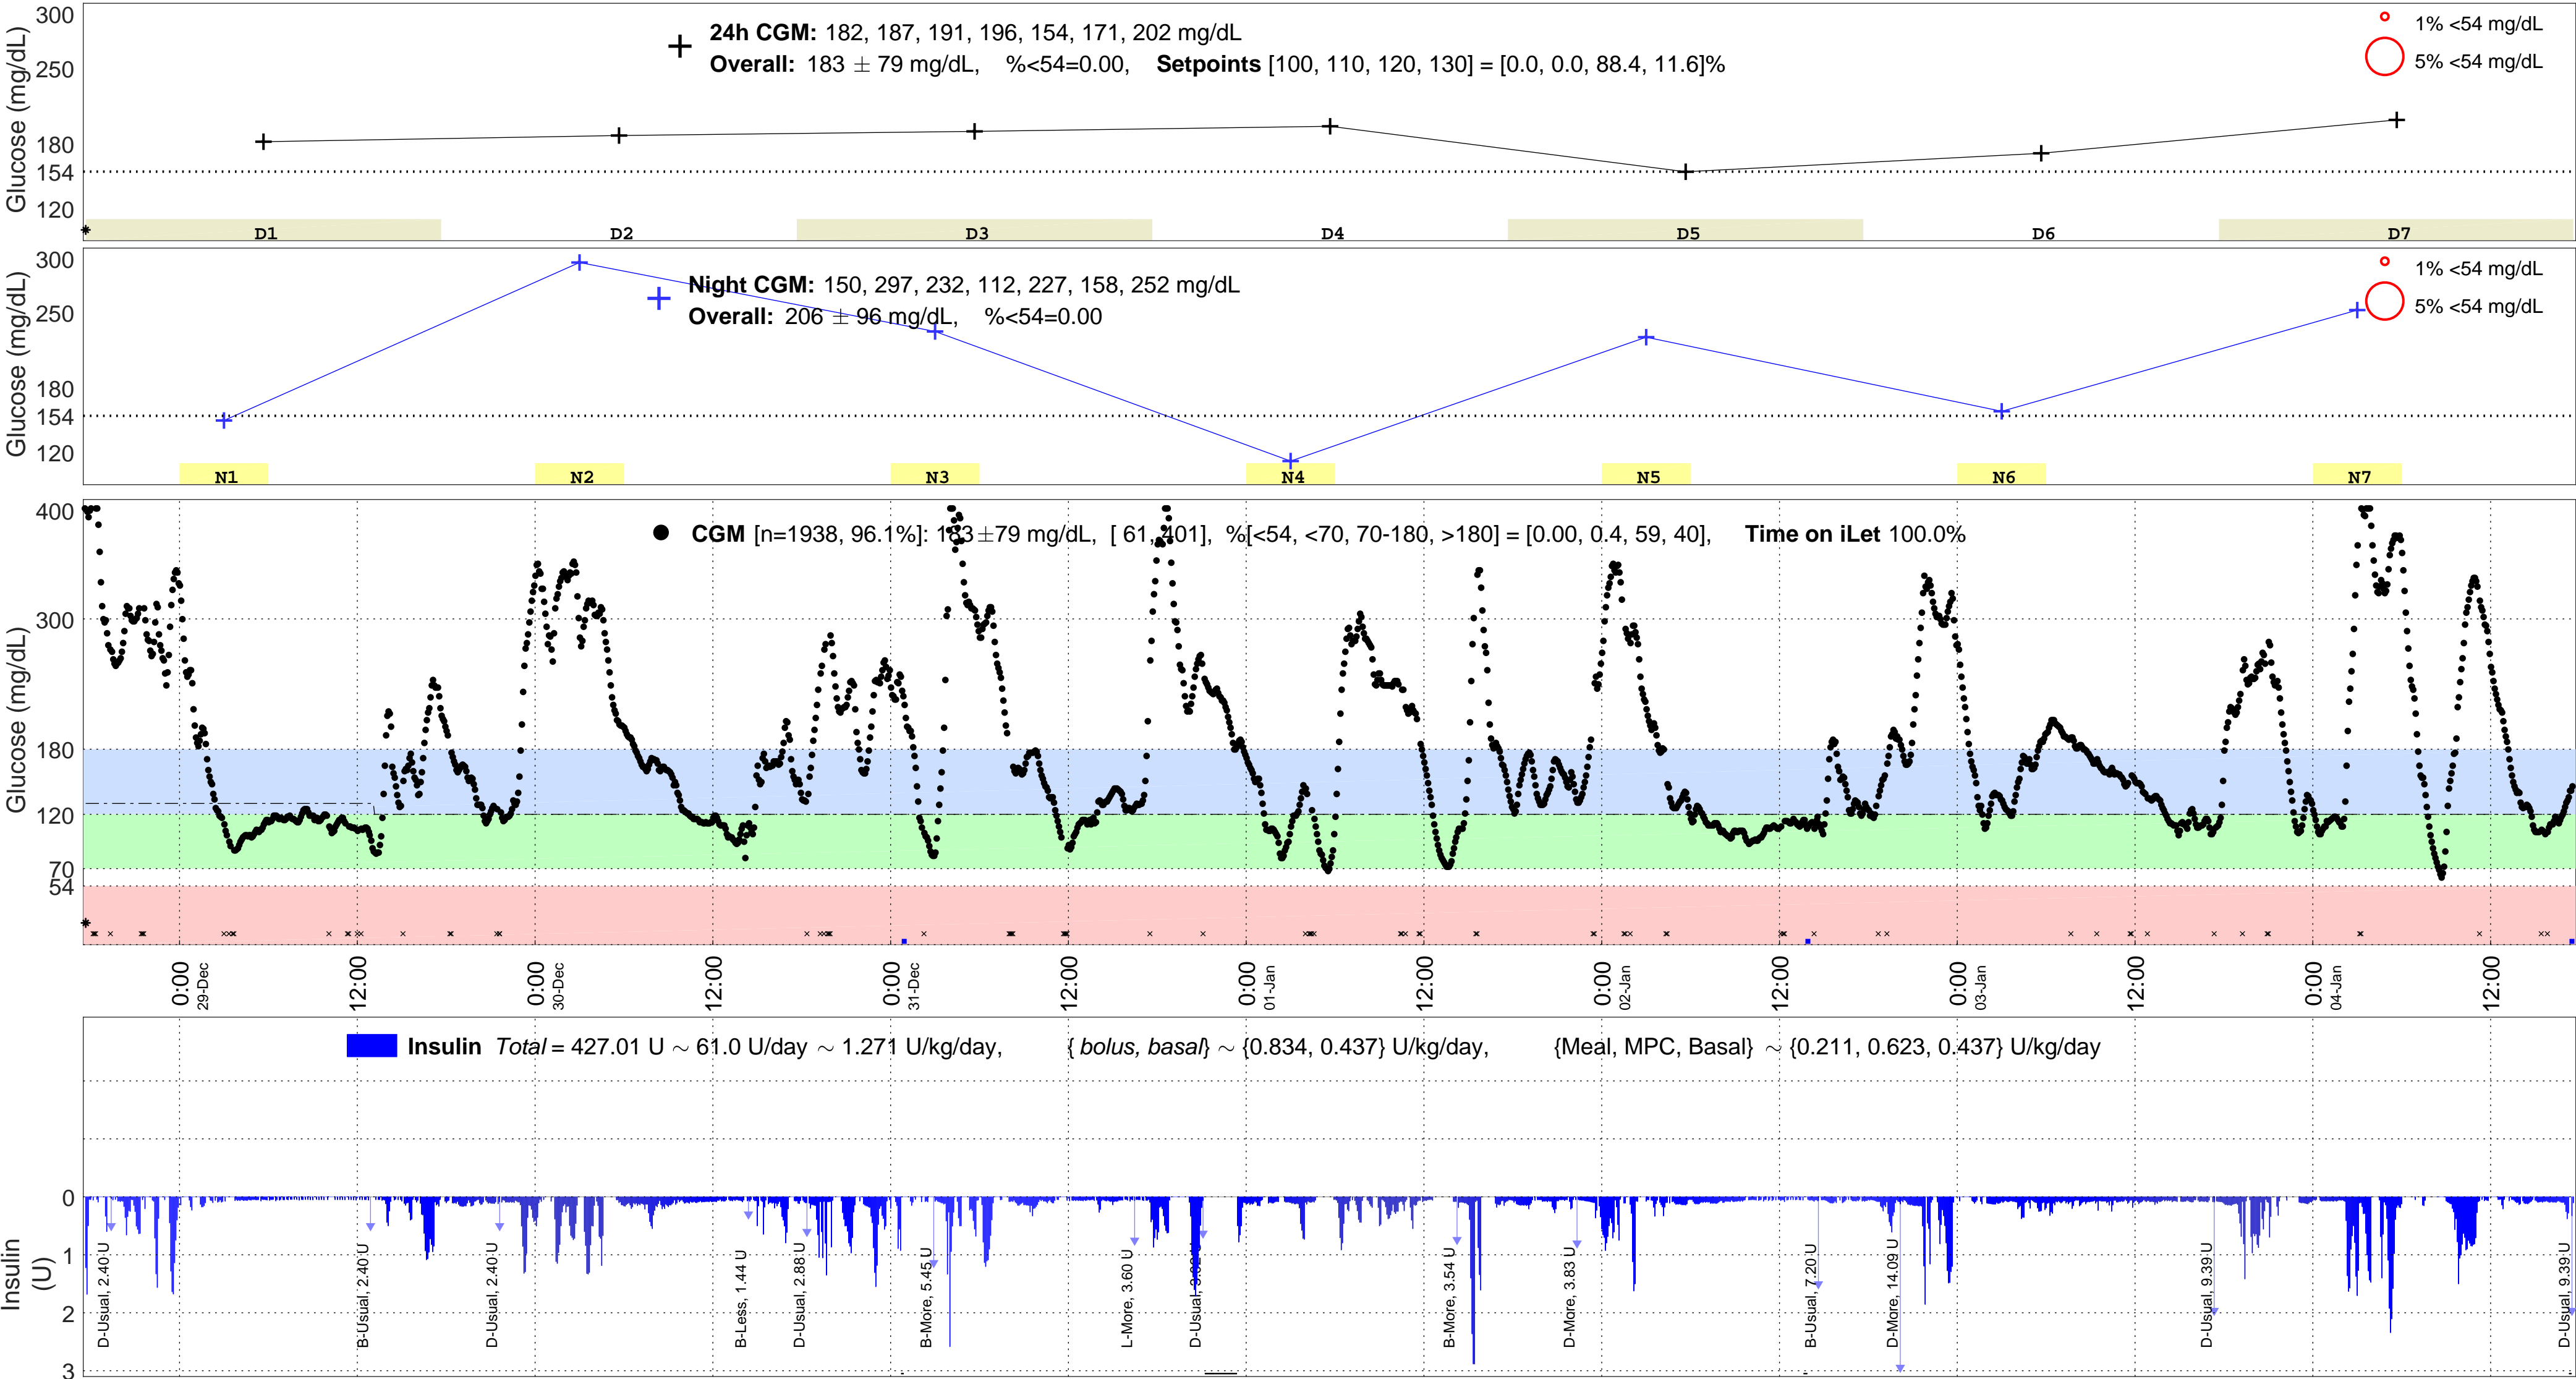

Bionic Pancreas (ID: CF-MGH-22-IM24\_Wk2, BM=48 kg), Insulin Only, 04-Jan-2022 17:40 to 11-Jan-2022 15:05[+6.9]

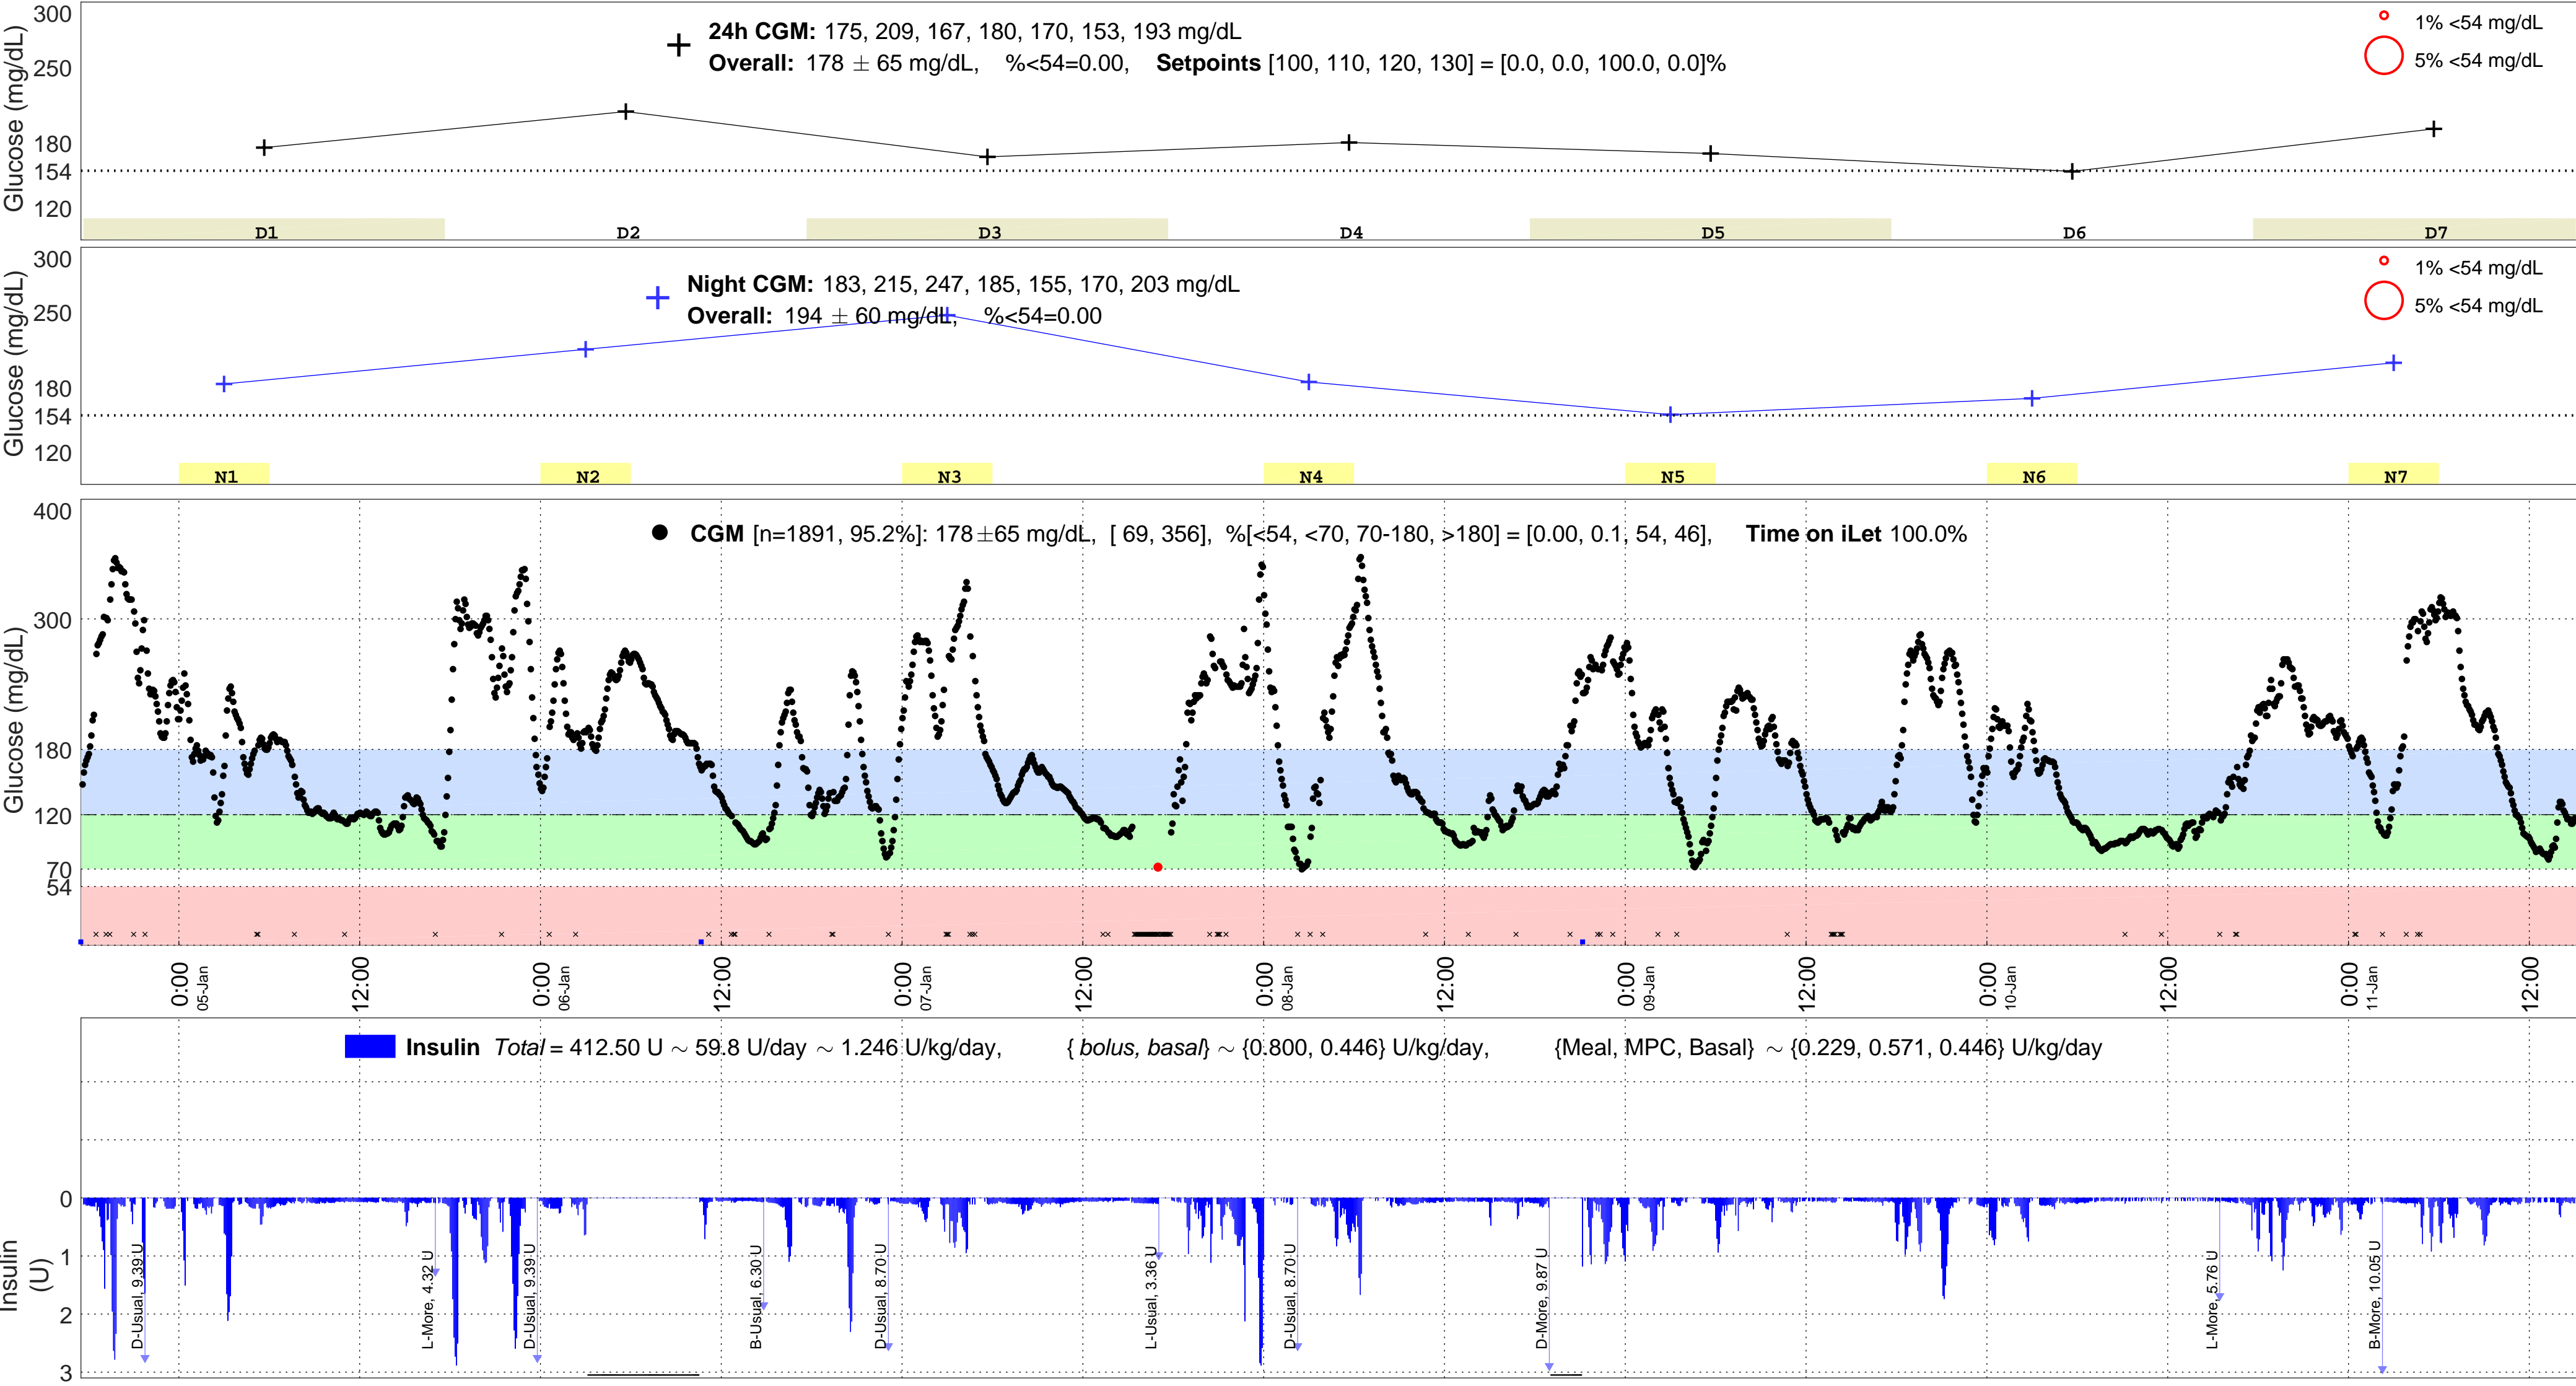



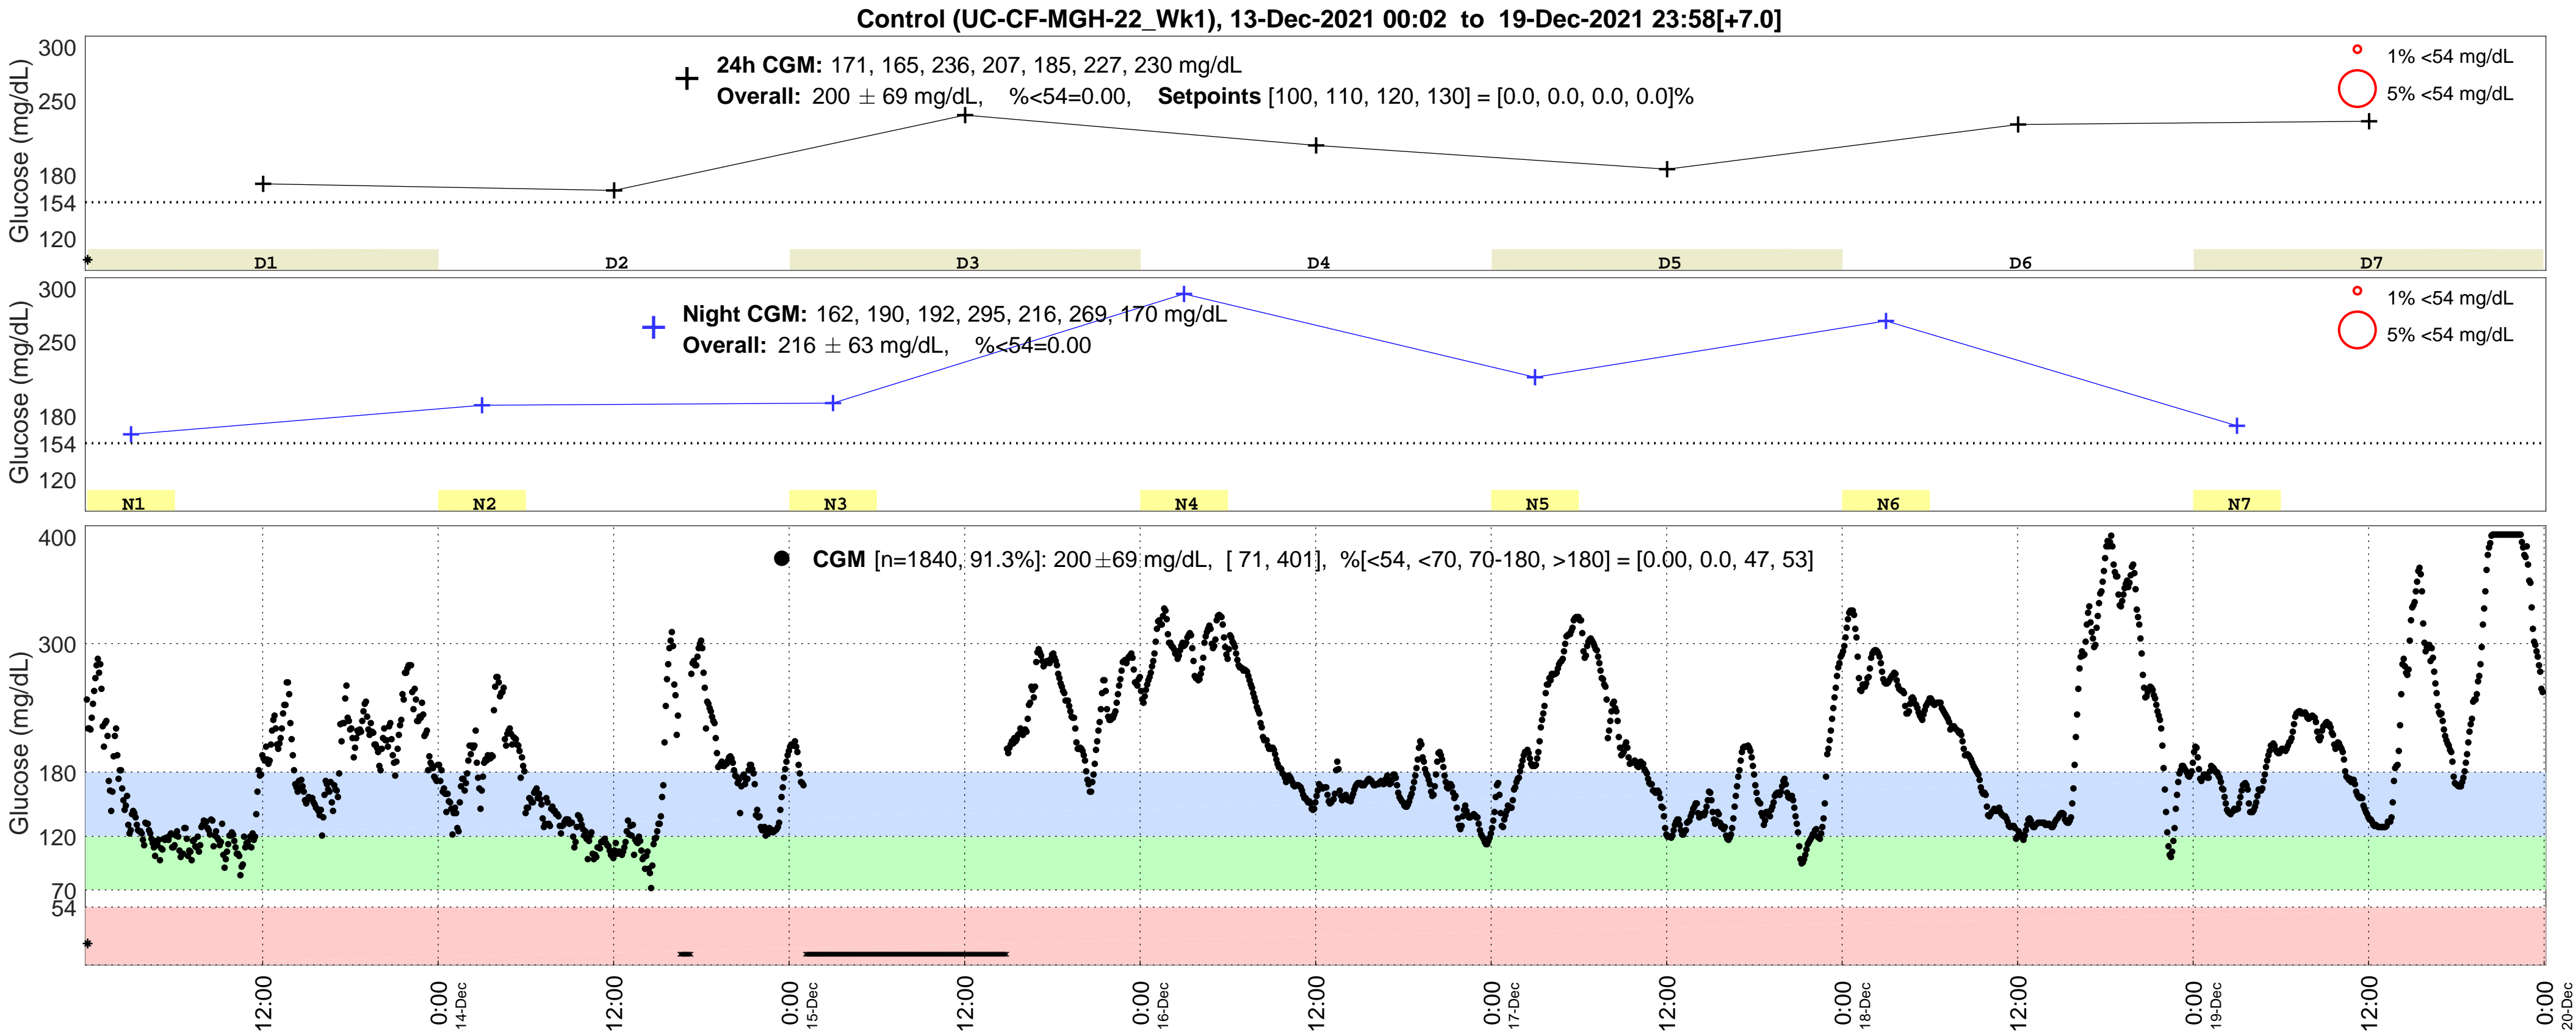

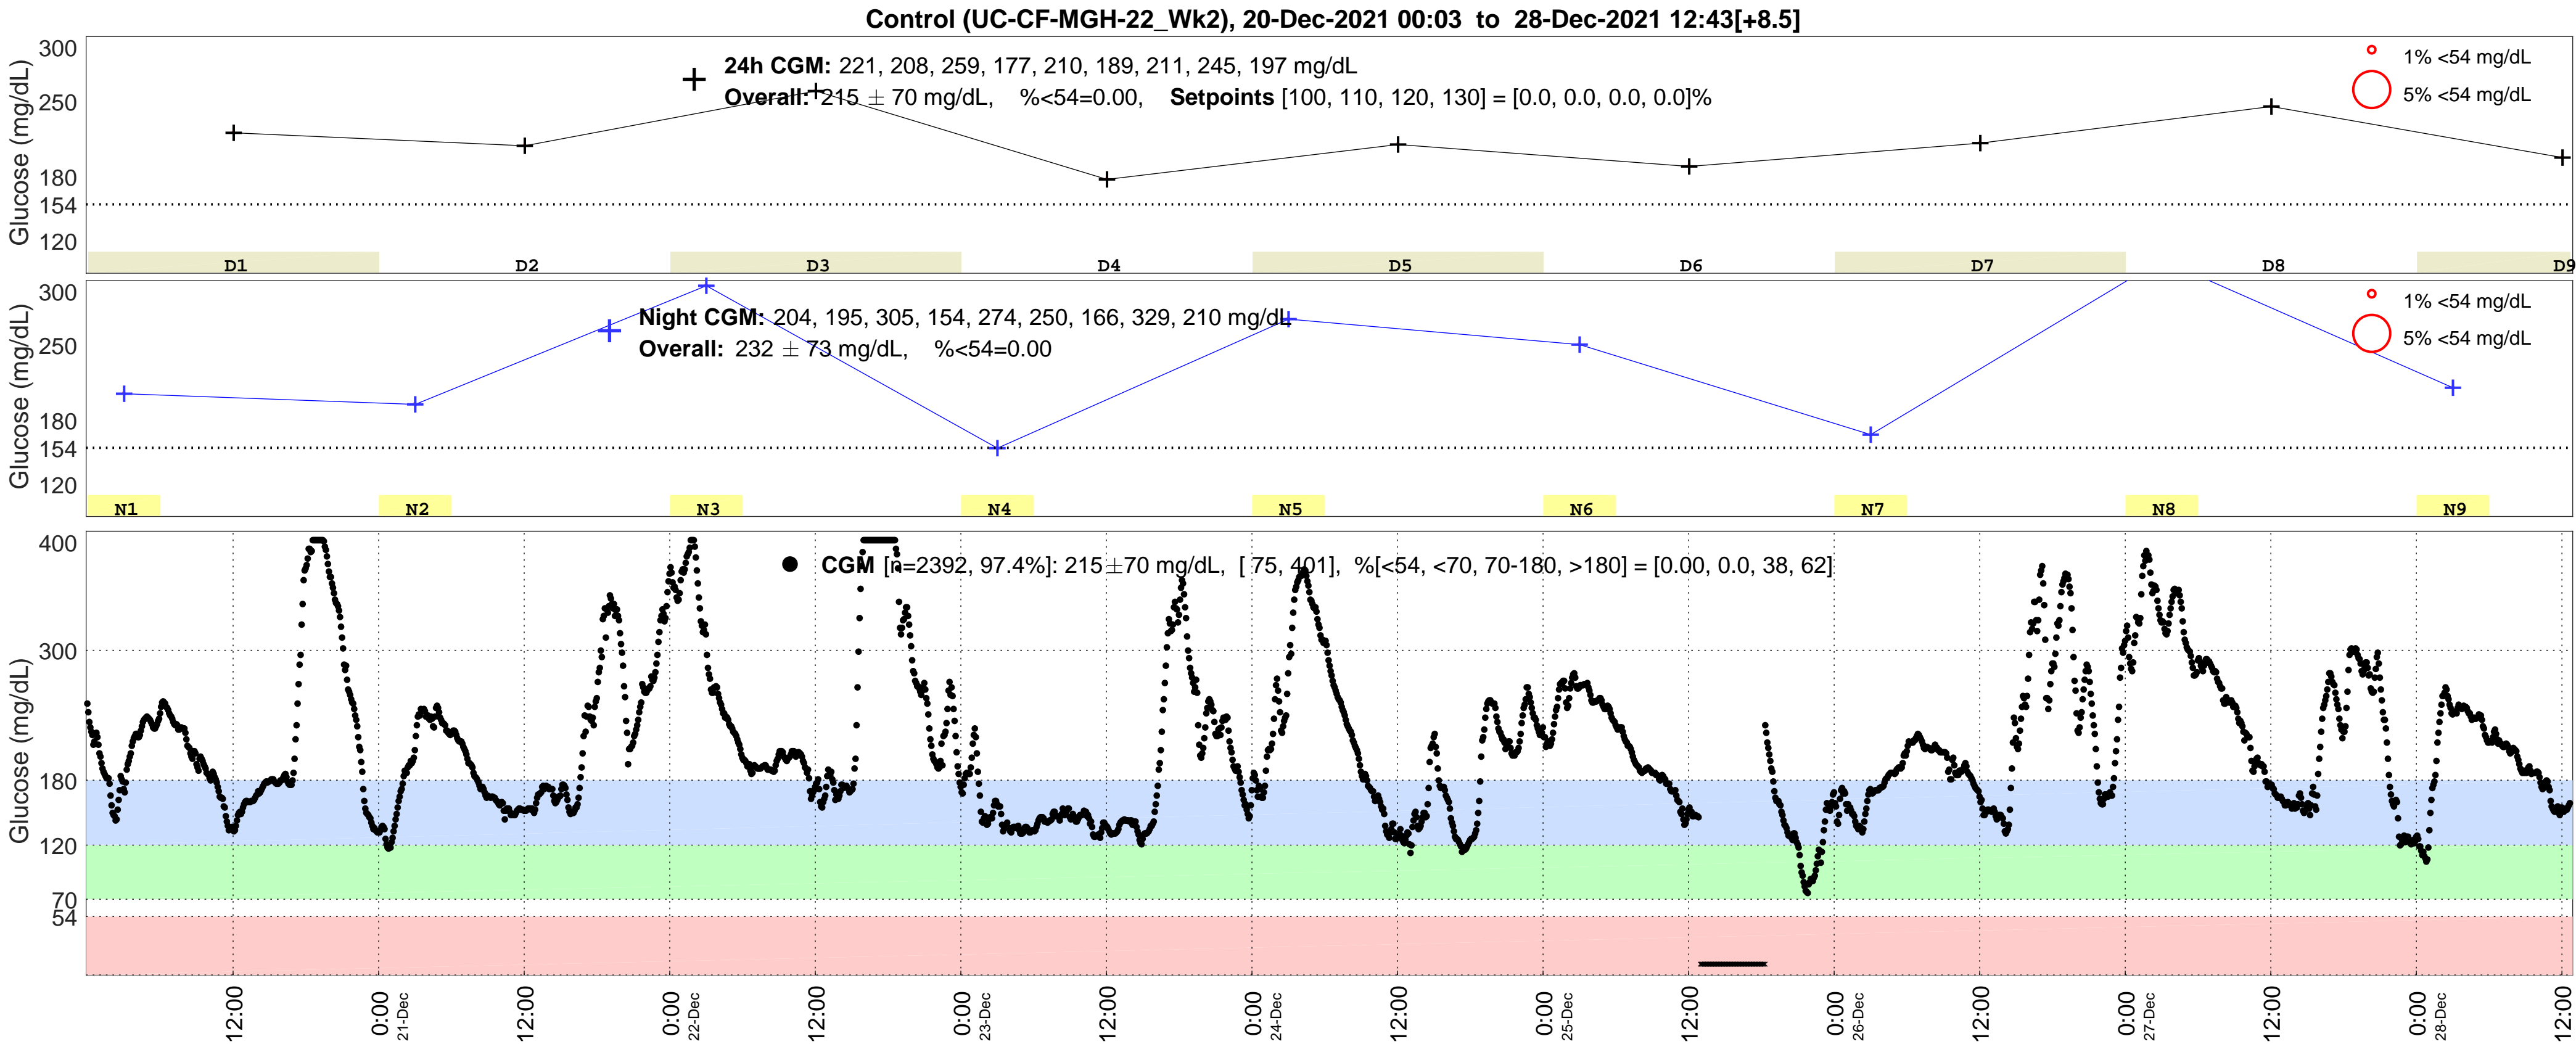

Bionic Pancreas (ID: CF-MGH-23-IP52\_Wk1, BM=68 kg), Insulin Only, 31-Mar-2022 12:04 to 07-Apr-2022 11:59[+7.0]

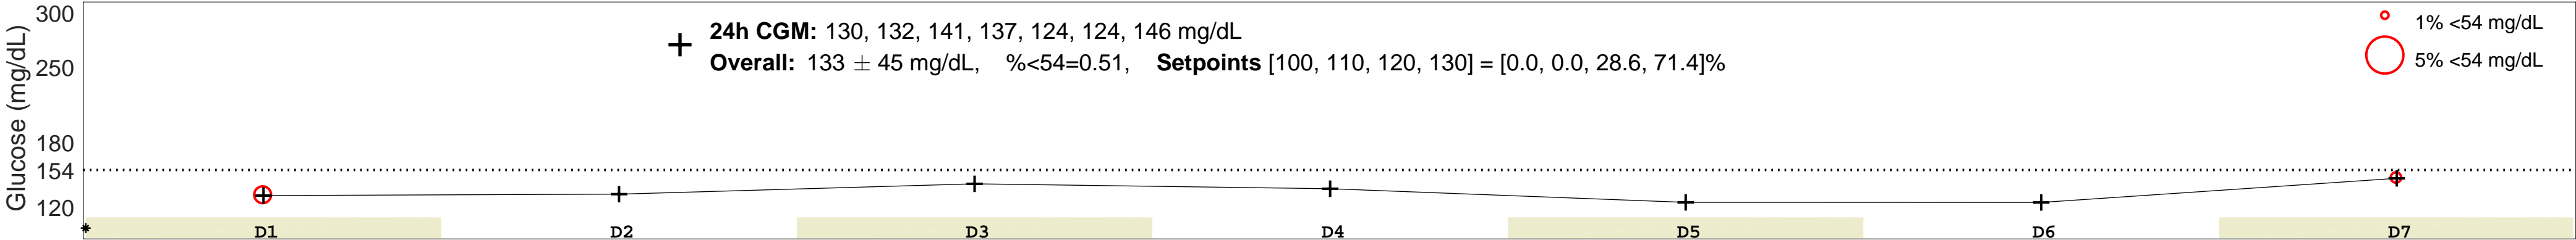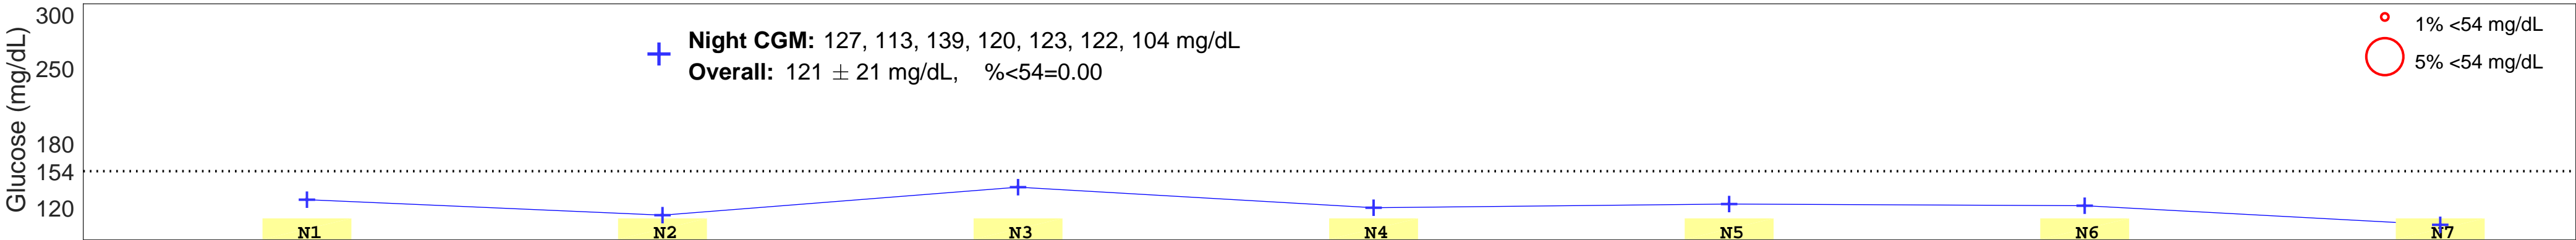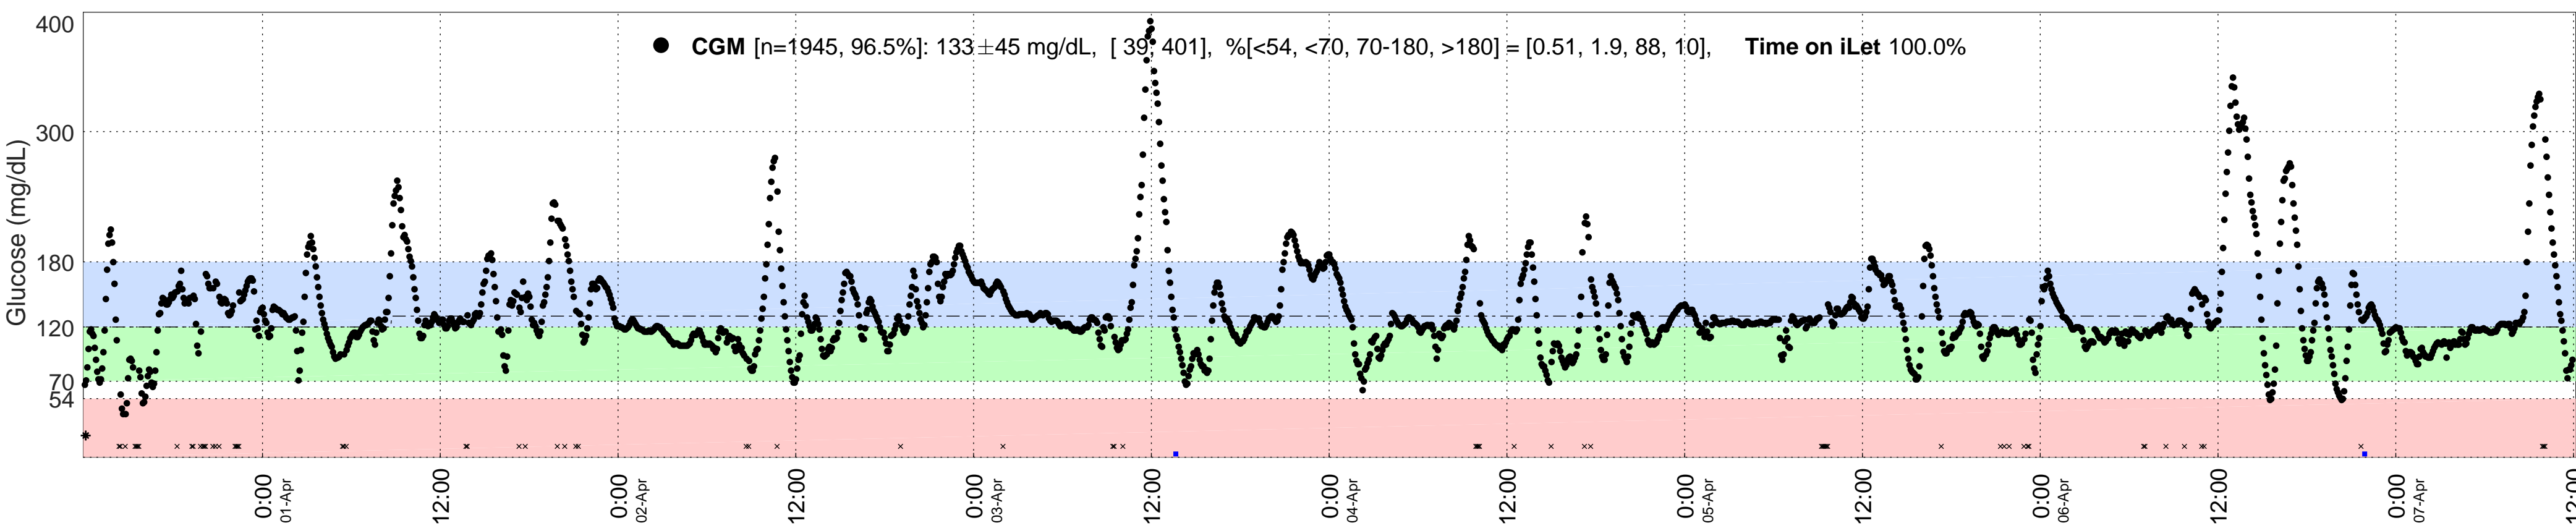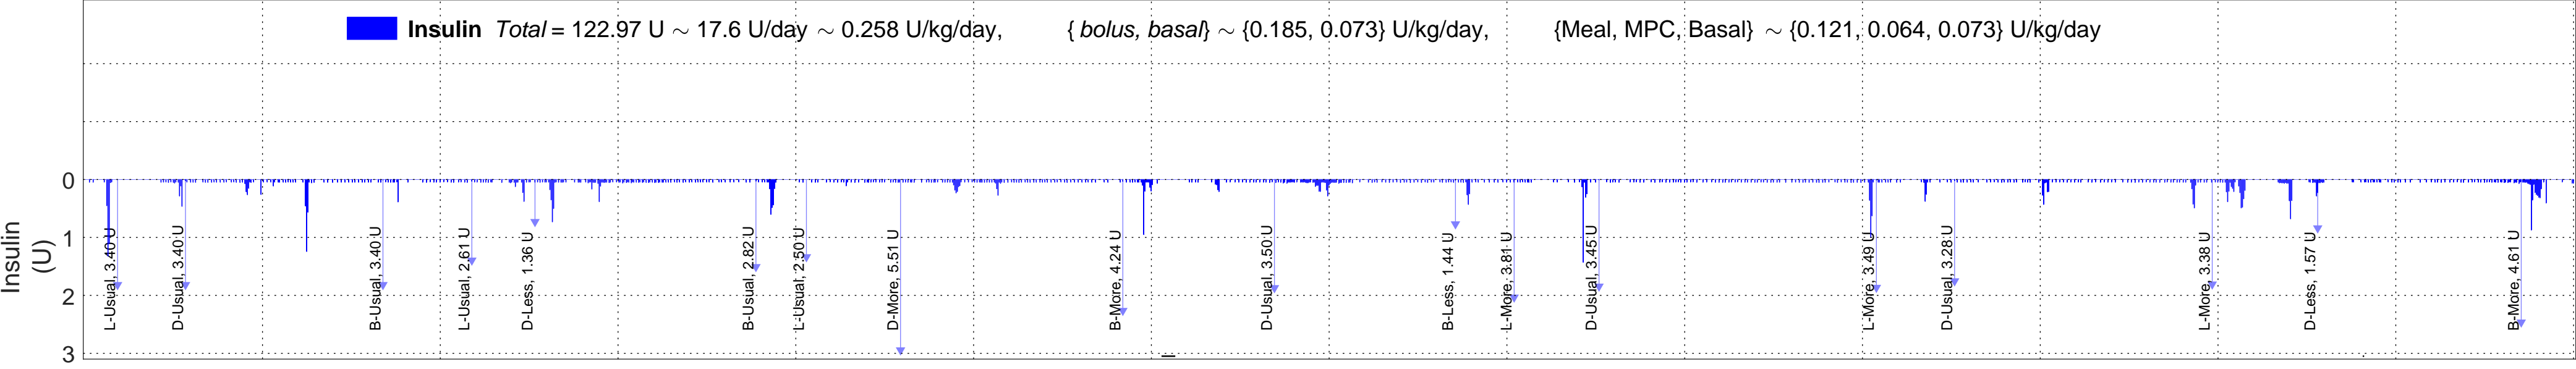

Bionic Pancreas (ID: CF-MGH-23-IP52\_Wk2, BM=68 kg), Insulin Only, 07-Apr-2022 12:04 to 14-Apr-2022 10:04[+6.9]

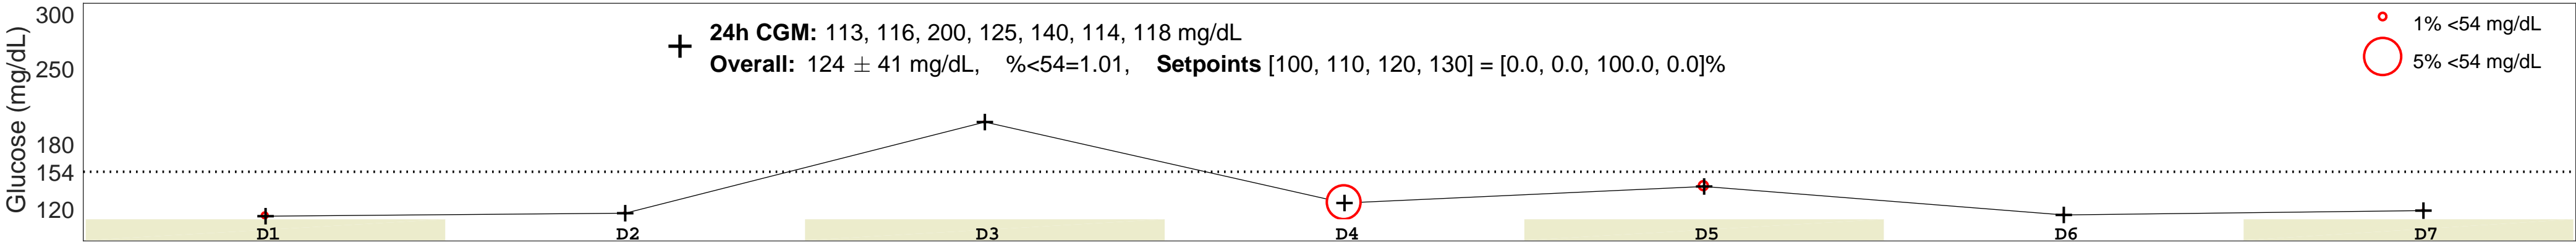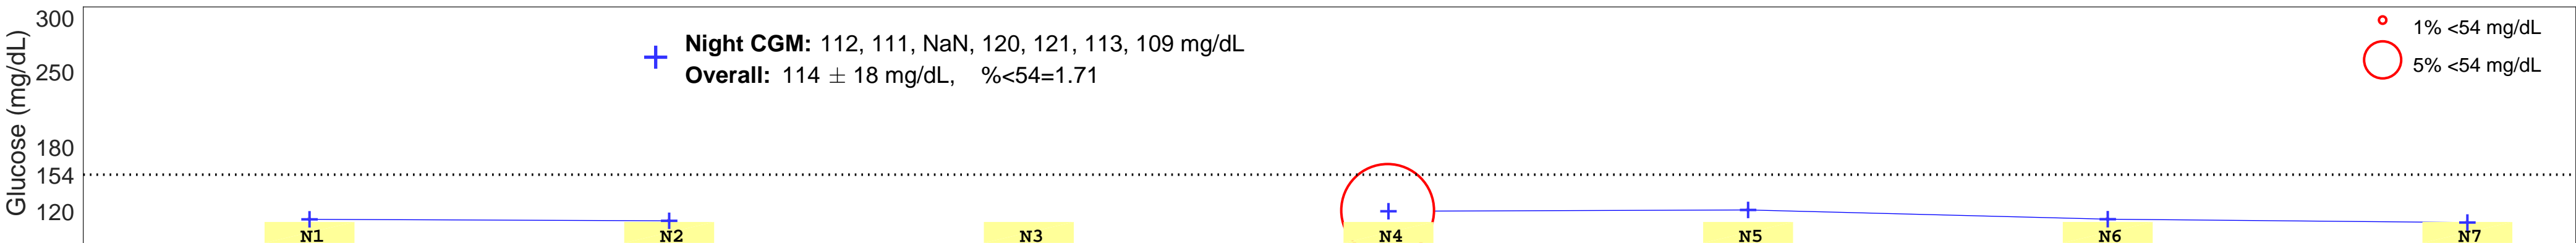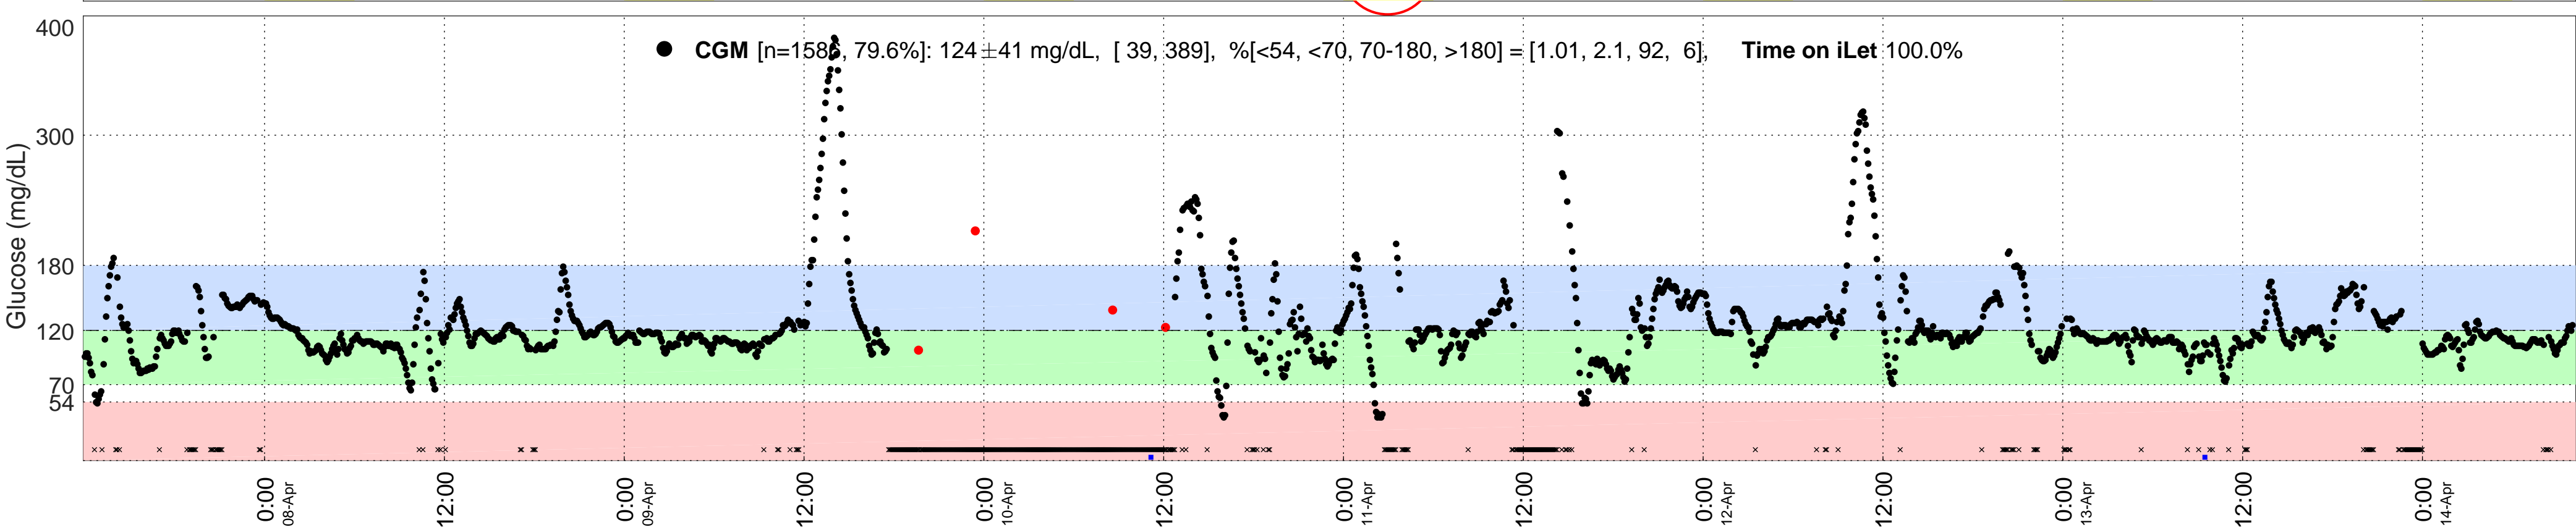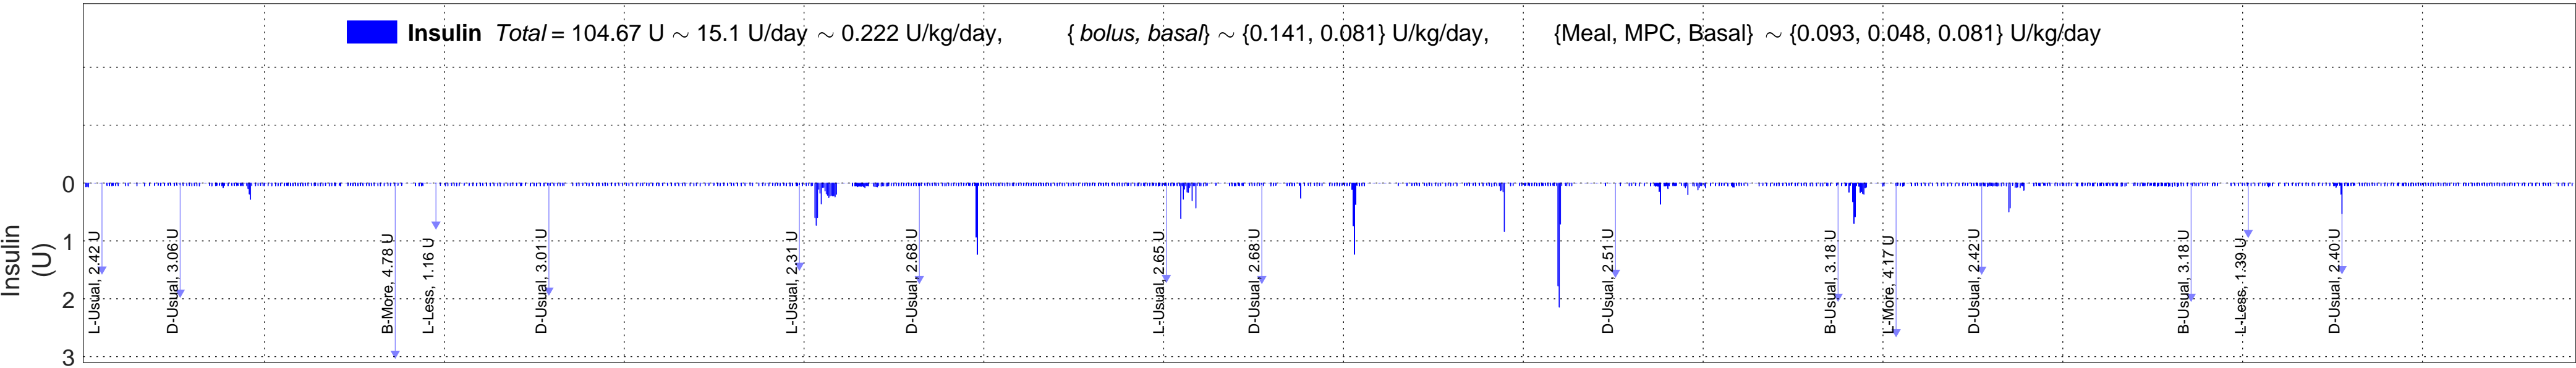

Control (UC-CF-MGH-23\_Wk1), 14-Apr-2022 10:05 to 21-Apr-2022 10:01[+7.0]

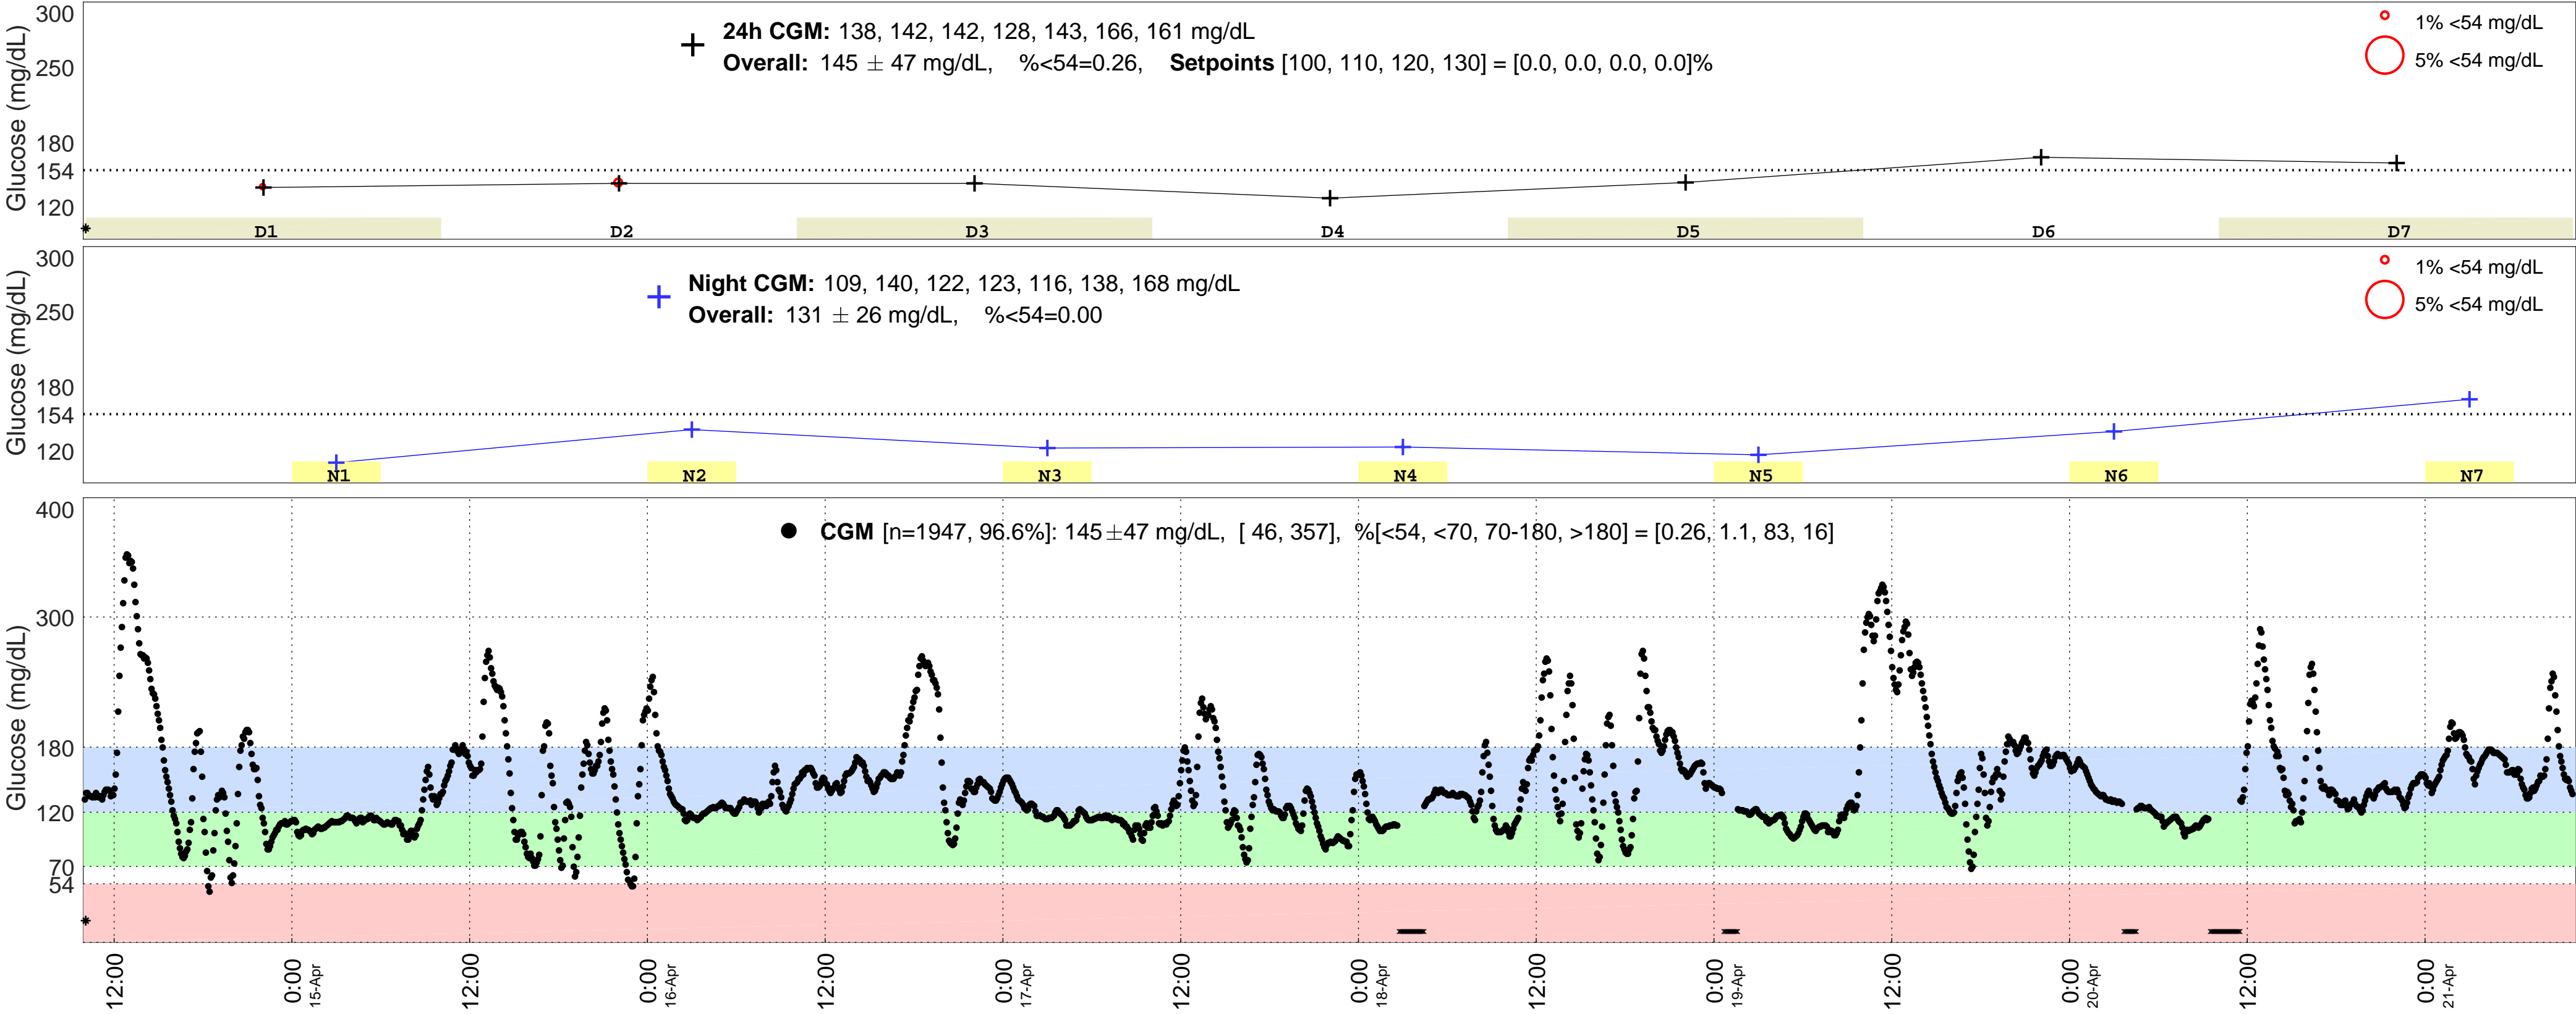



Control (UC-CF-MGH-23\_Wk2), 21-Apr-2022 10:06 to 27-Apr-2022 21:51[+6.5]

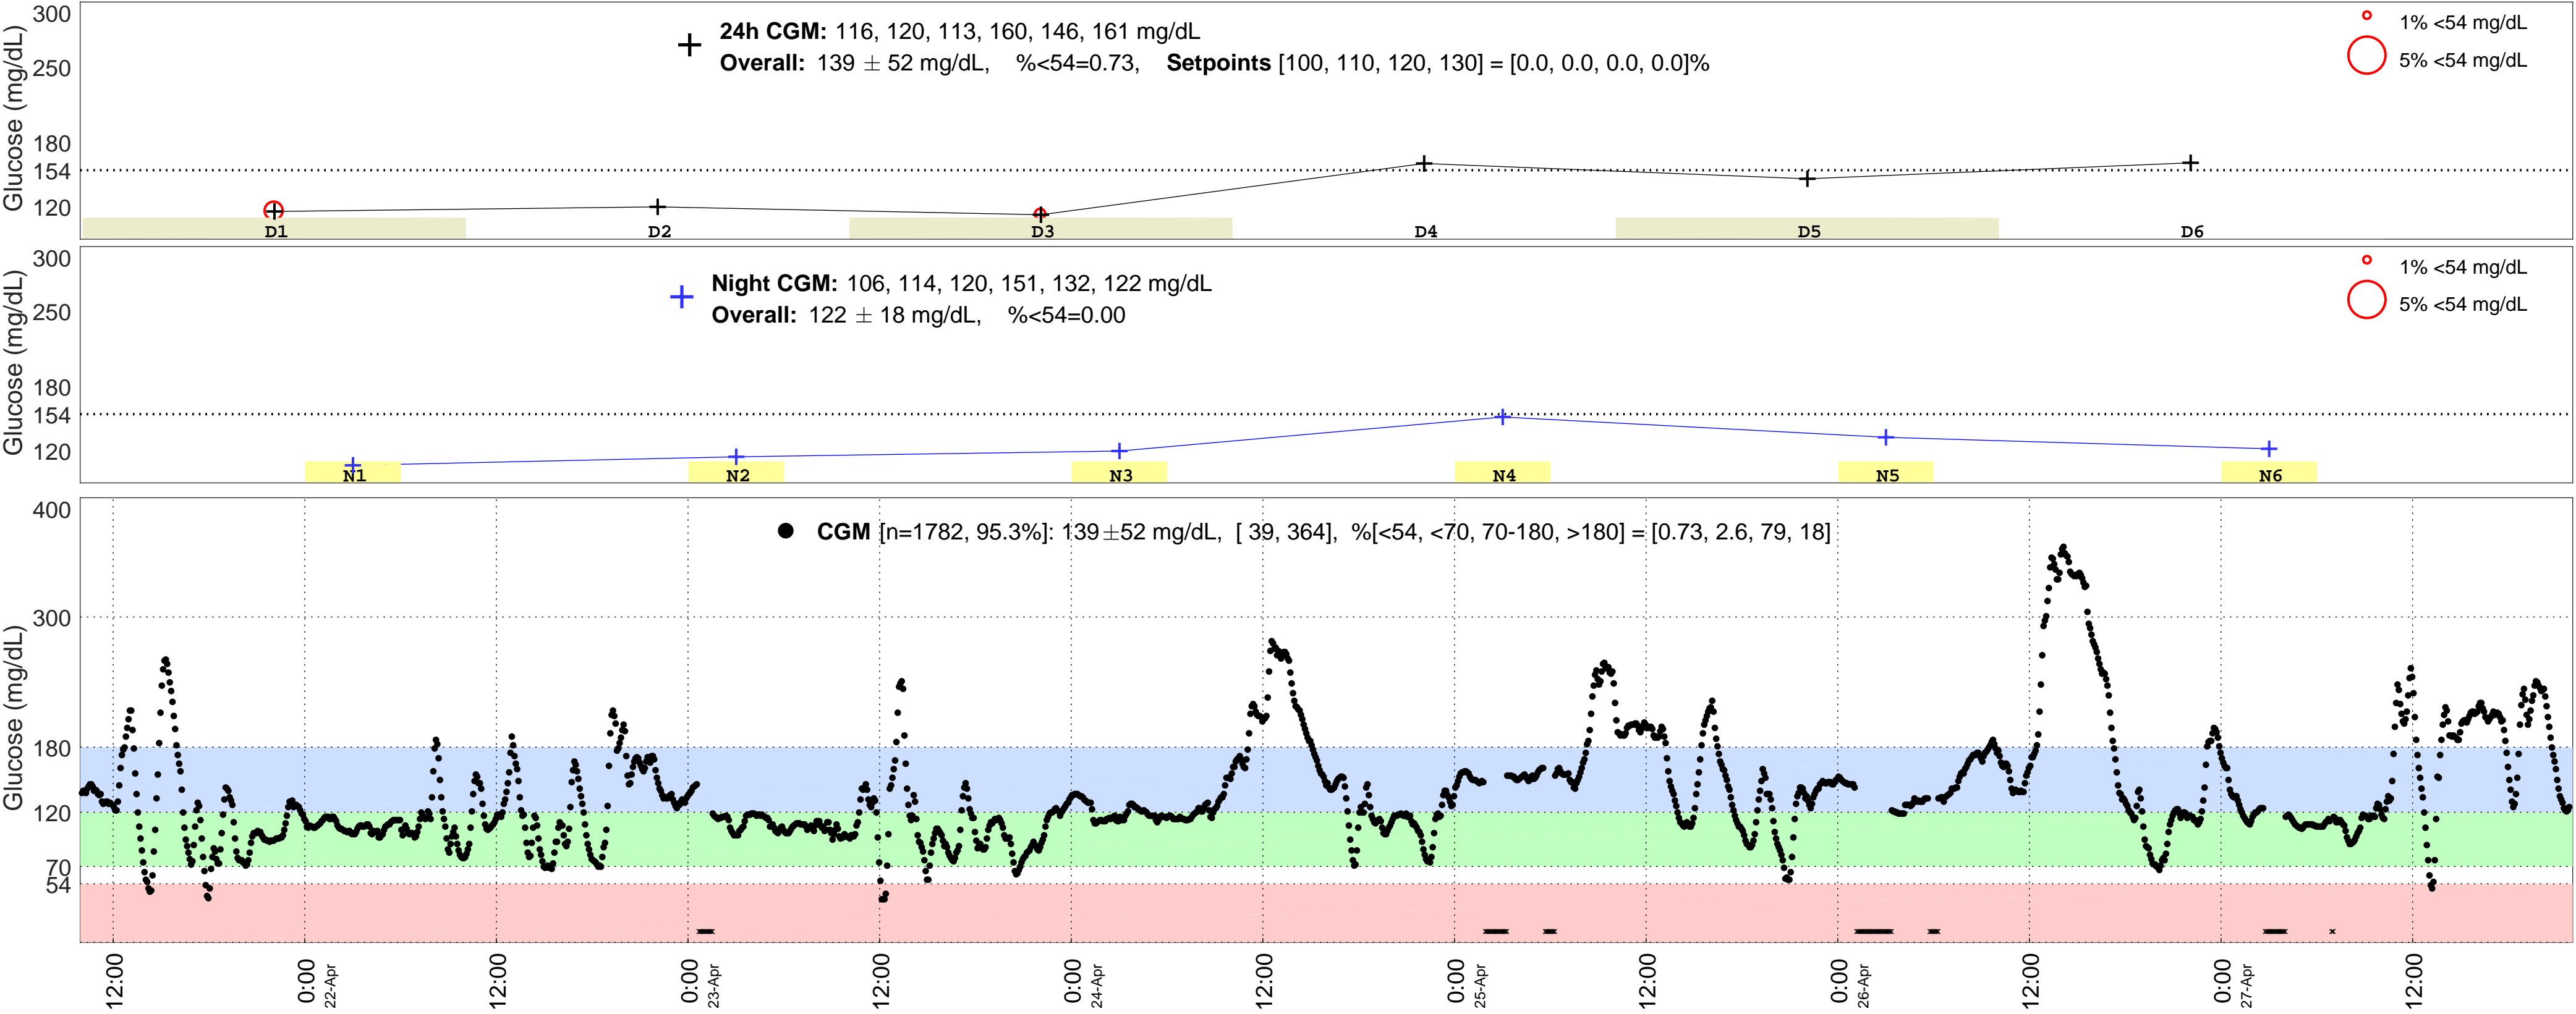

Bionic Pancreas (ID: CF-MGH-24-IM23\_Wk1, BM=68 kg), Insulin Only, 30-Dec-2021 12:01 to 06-Jan-2022 11:56[+7.0]

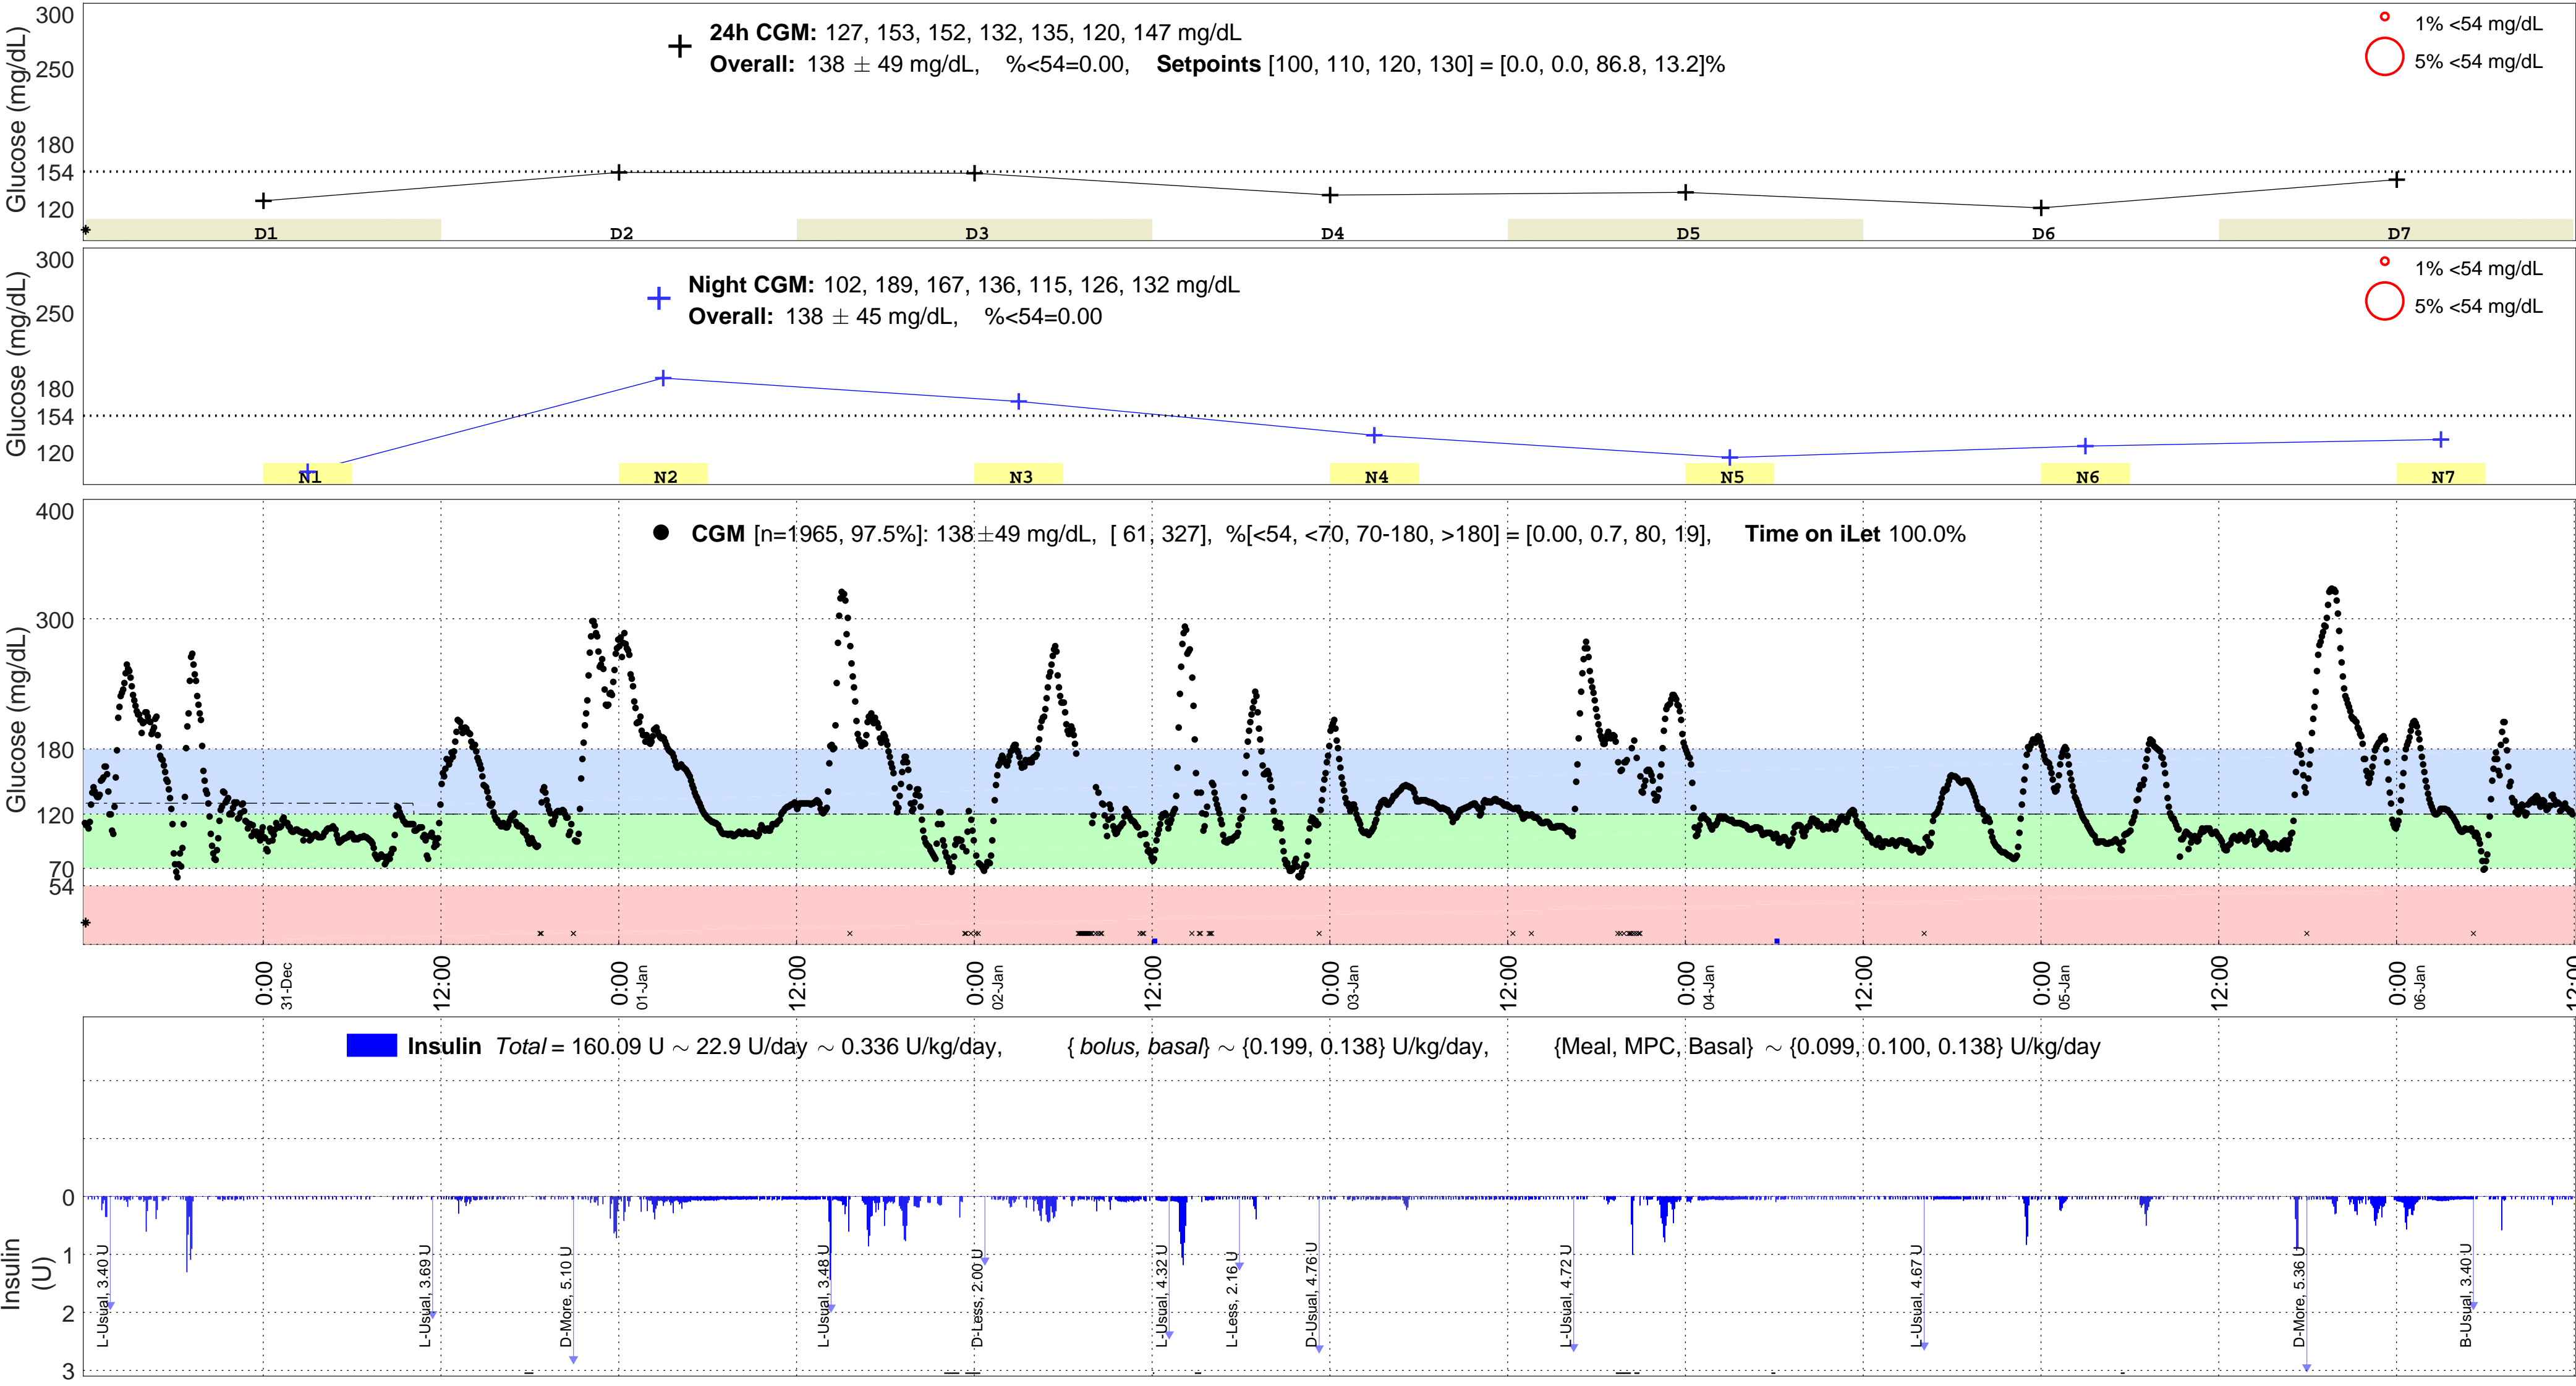

Bionic Pancreas (ID: CF-MGH-24-IM23\_Wk2, BM=68 kg), Insulin Only, 06-Jan-2022 12:01 to 13-Jan-2022 09:11[+6.9]

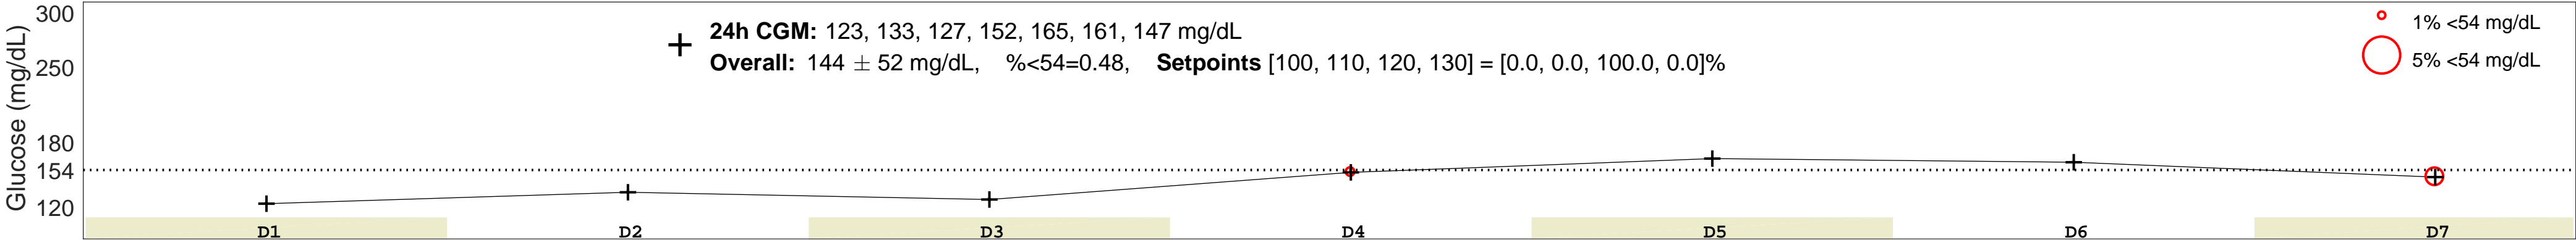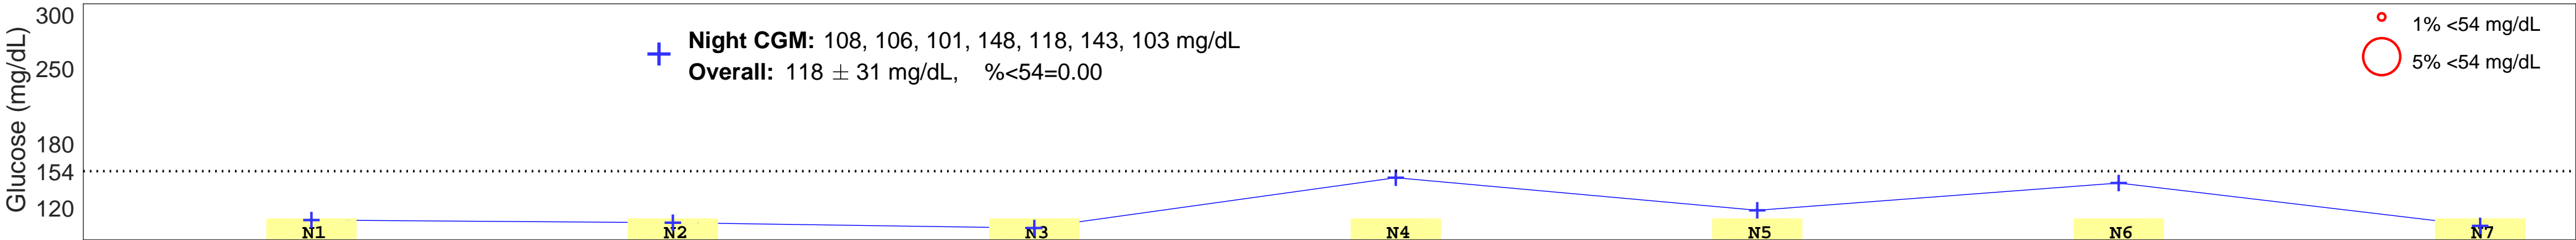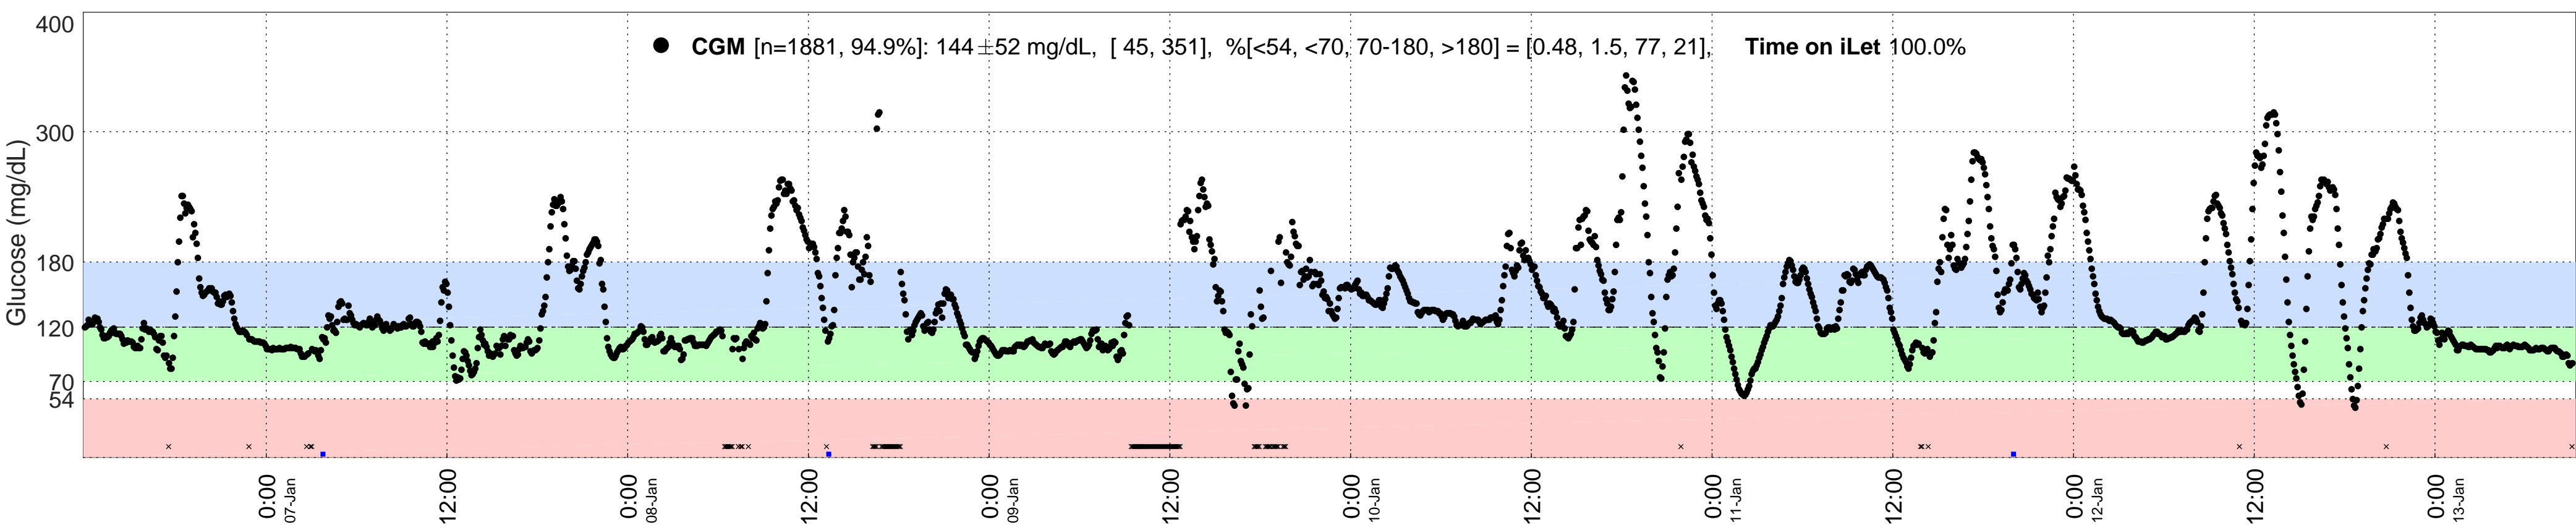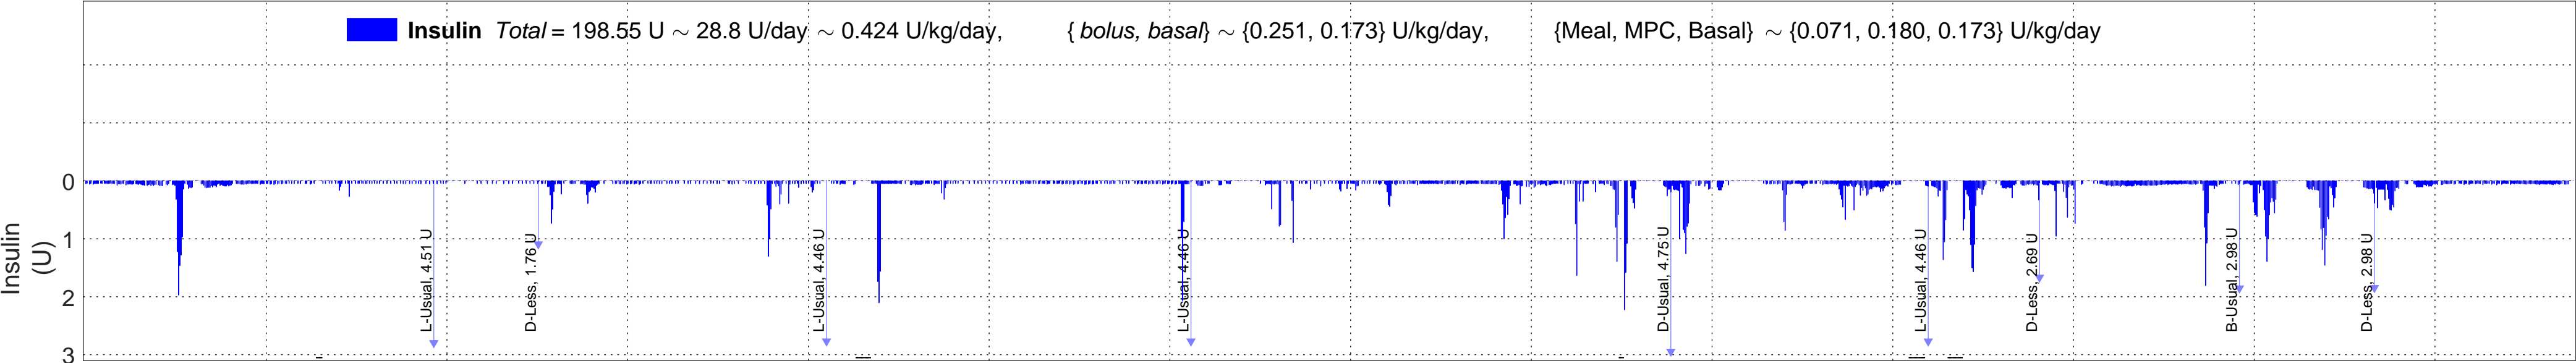

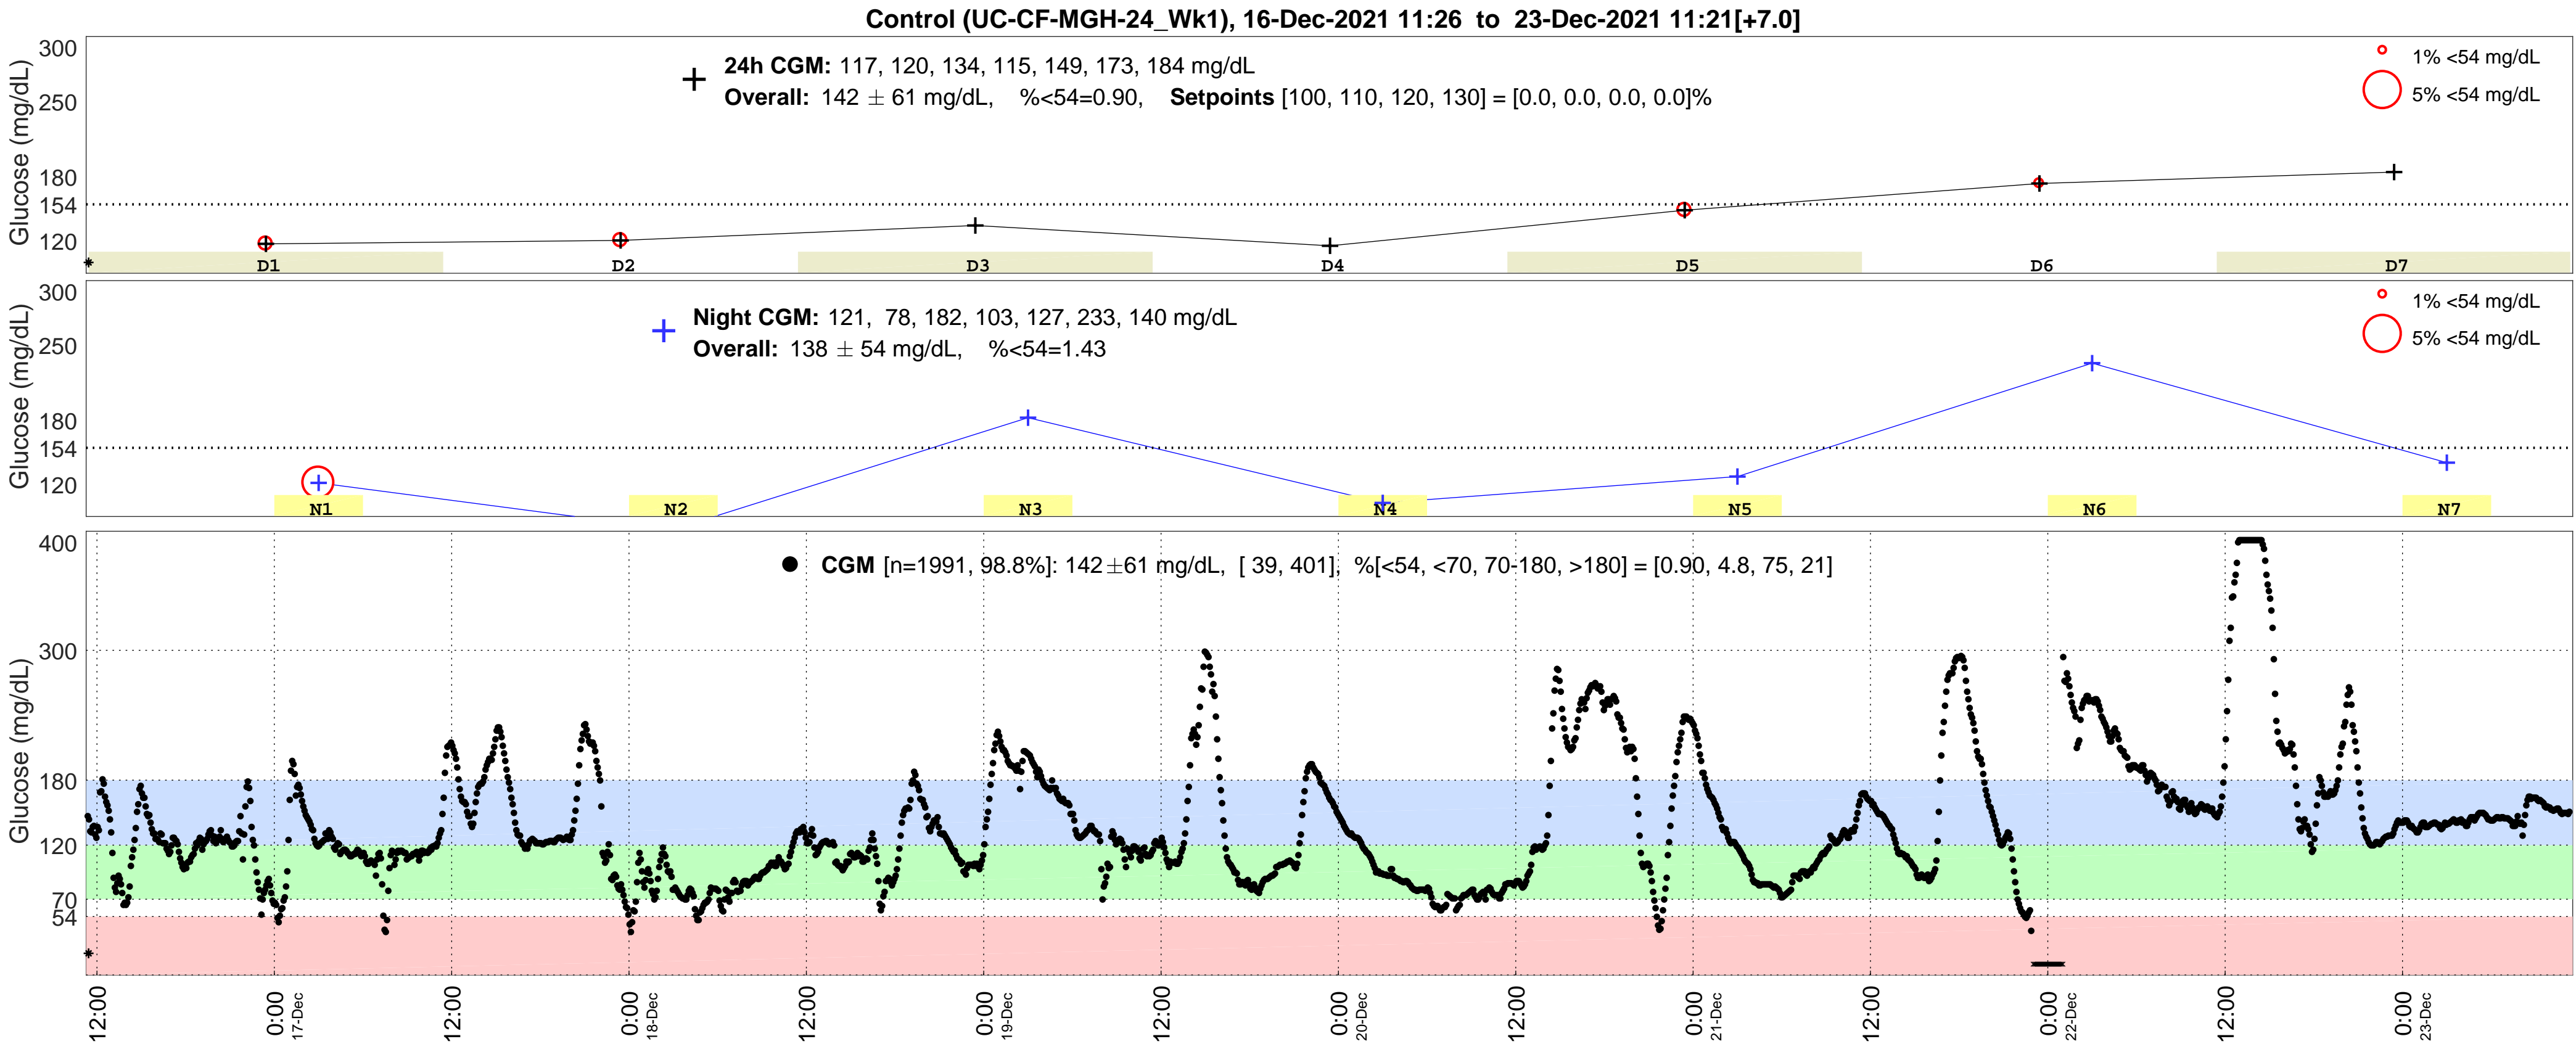

Control (UC-CF-MGH-24\_Wk2), 23-Dec-2021 11:26 to 29-Dec-2021 13:01[+6.1]

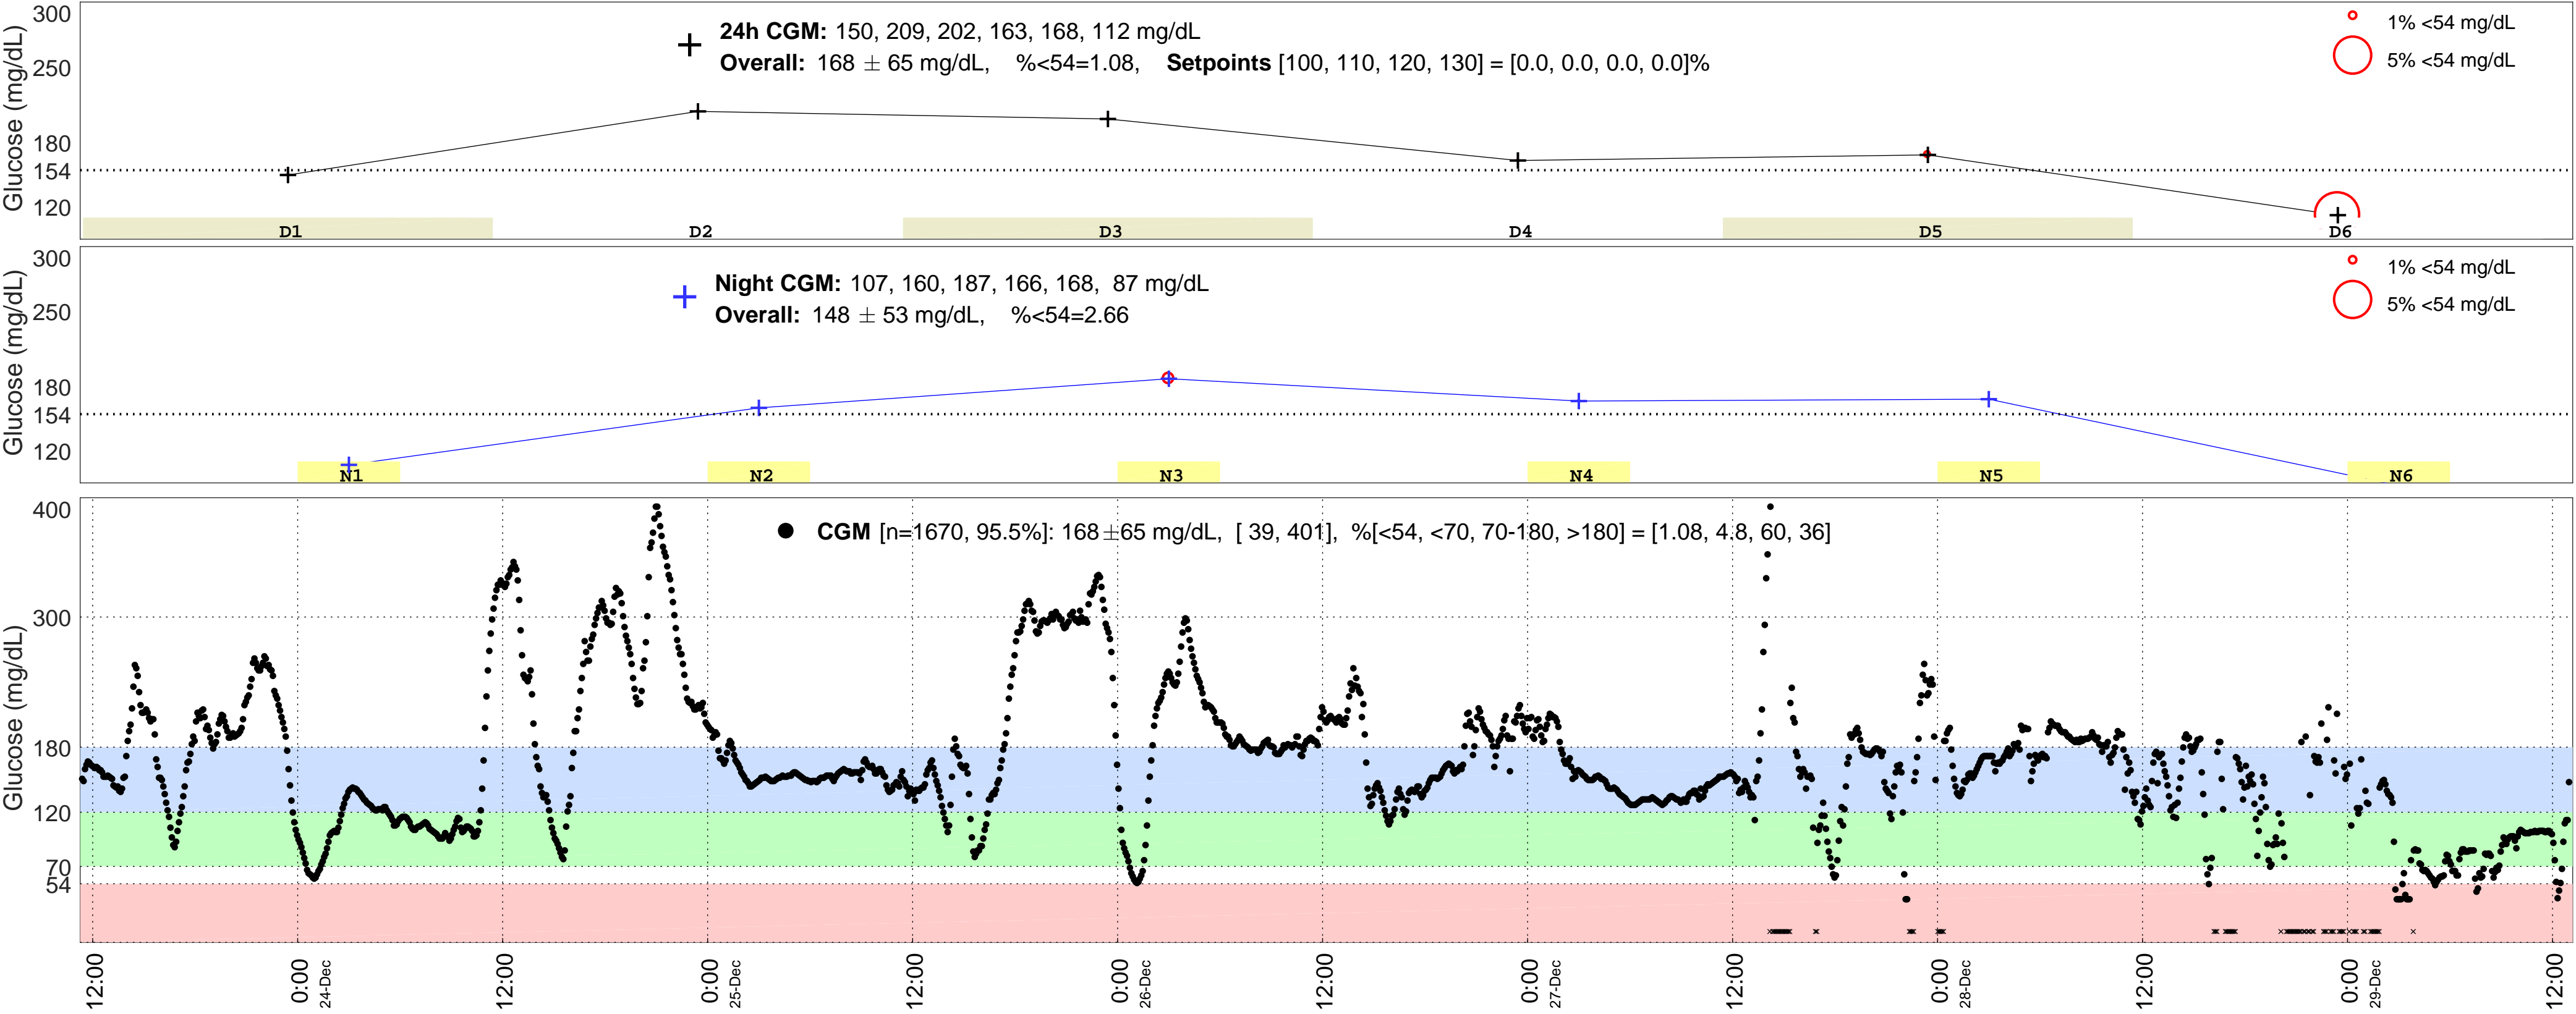



Bionic Pancreas (ID: CF-MGH-25-IM37\_Wk1, BM=68 kg), Insulin Only, 07-Feb-2022 16:17 to 14-Feb-2022 16:12[+7.0]

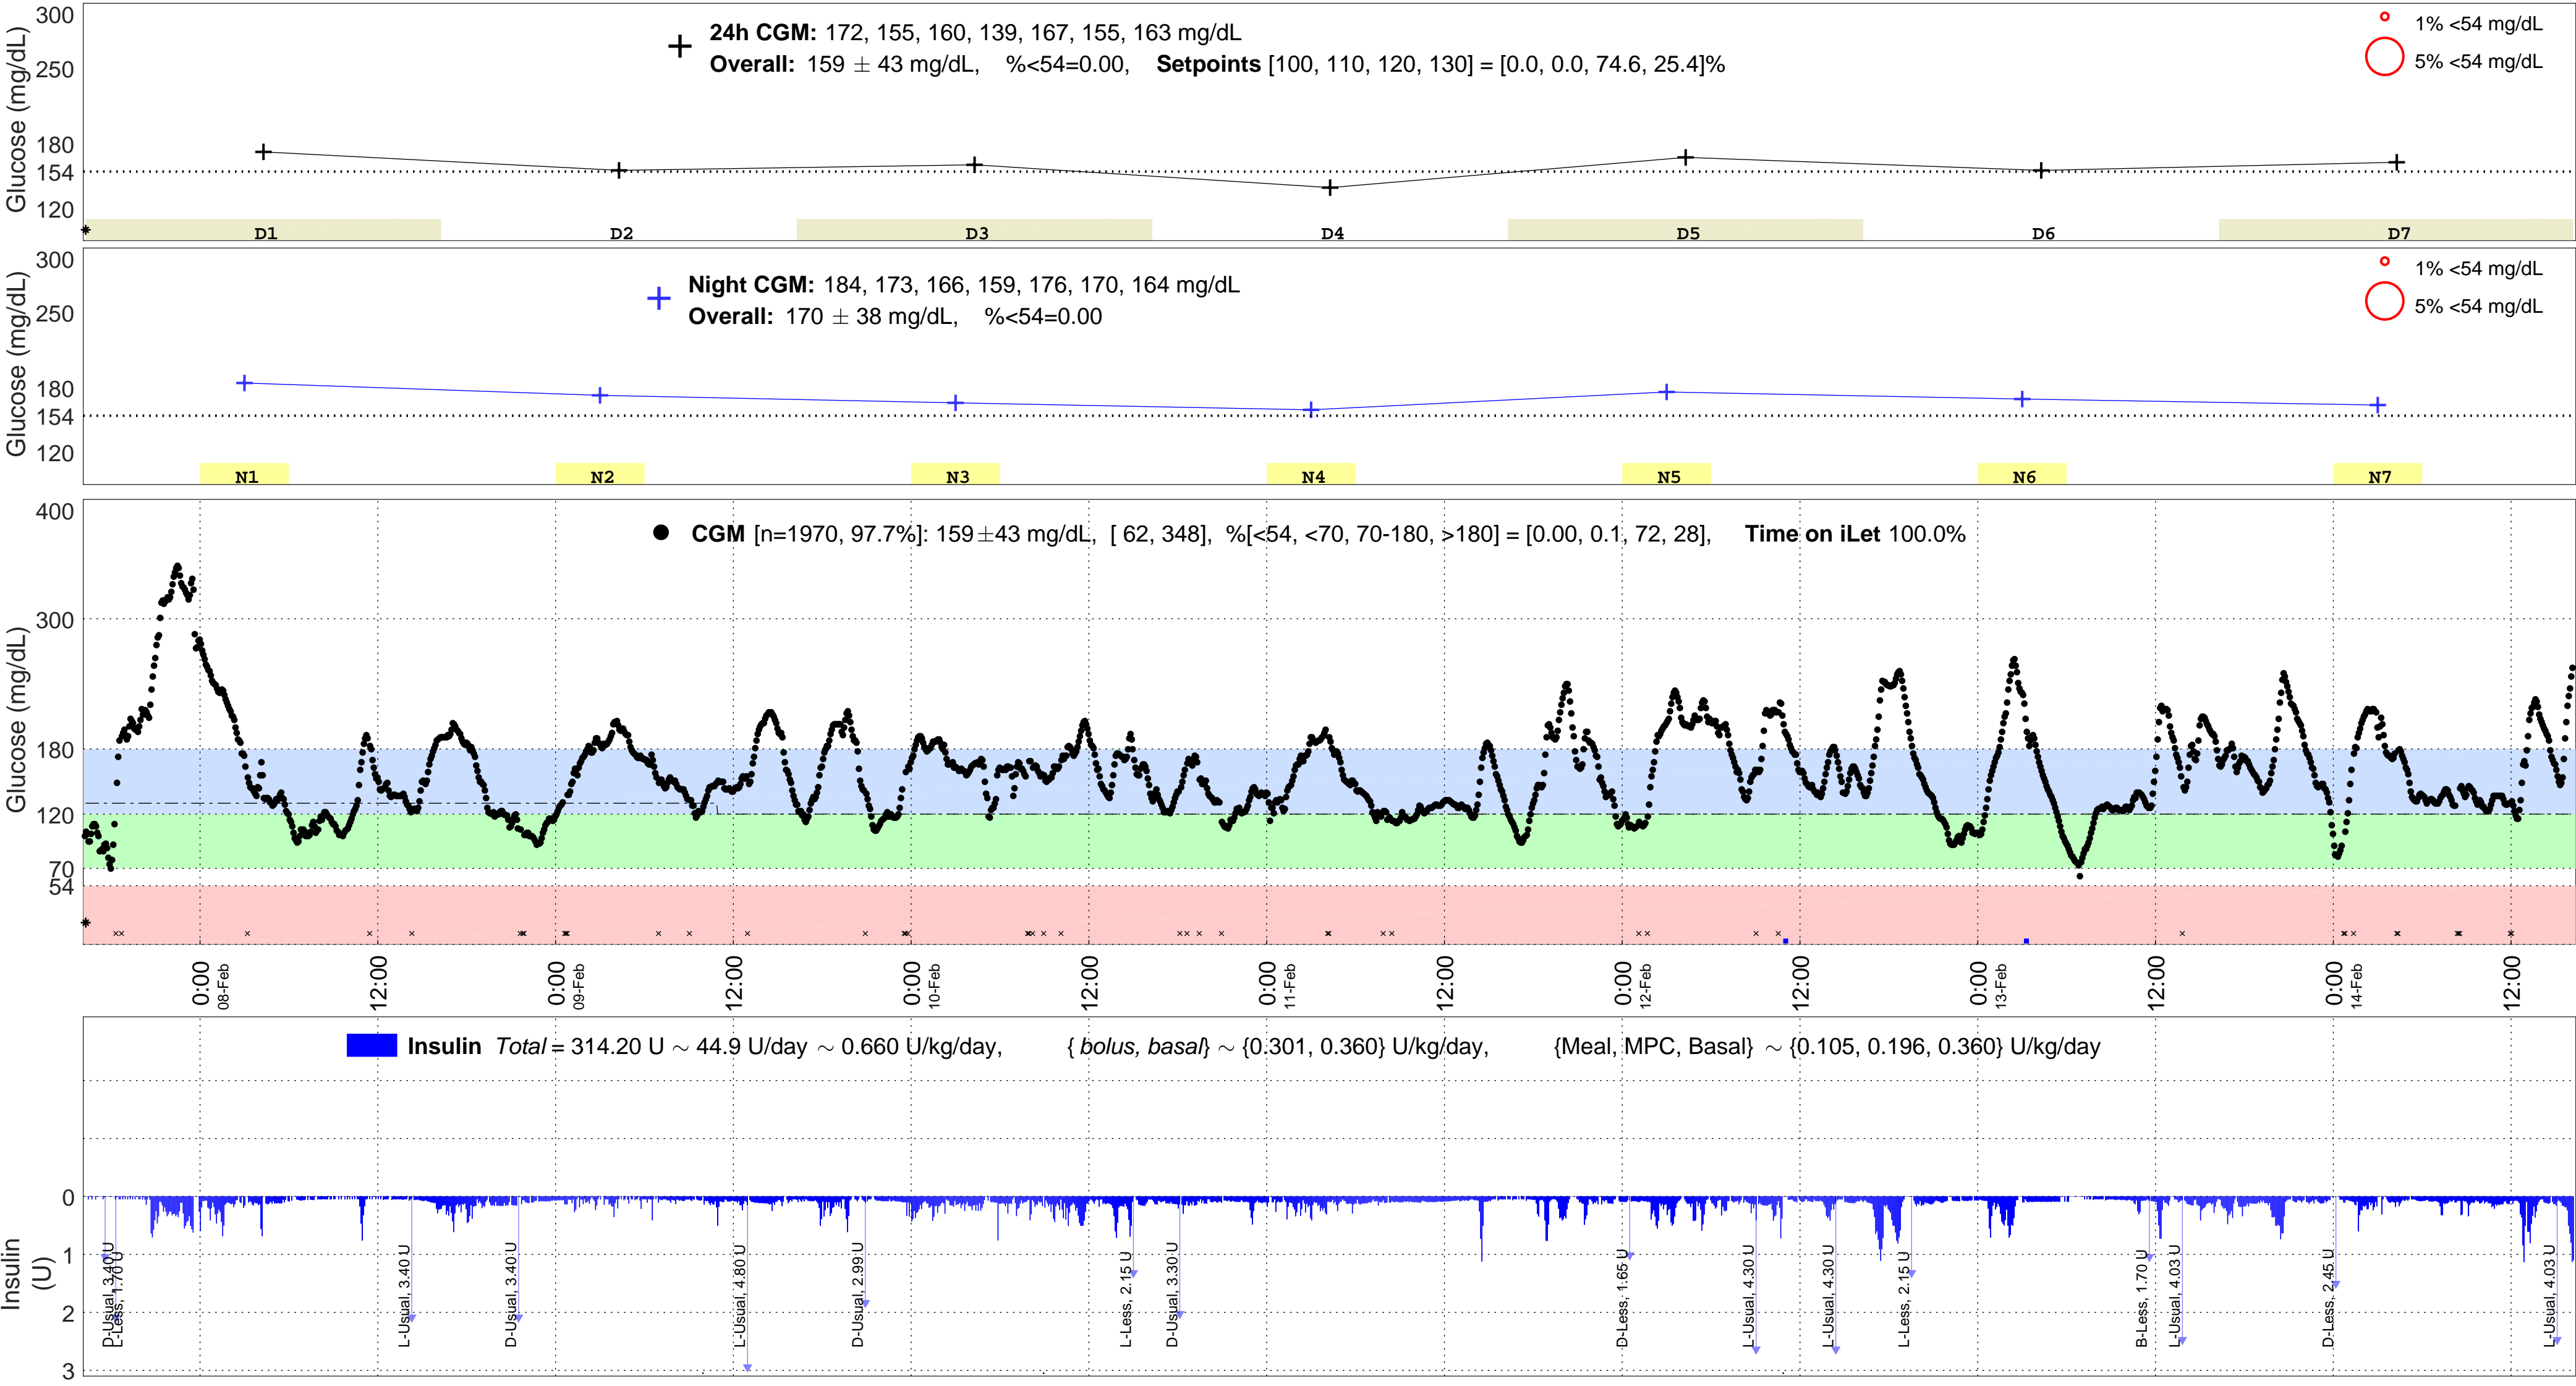

Bionic Pancreas (ID: CF-MGH-25-IM37\_Wk2, BM=68 kg), Insulin Only, 14-Feb-2022 16:17 to 22-Feb-2022 12:07[+7.8]

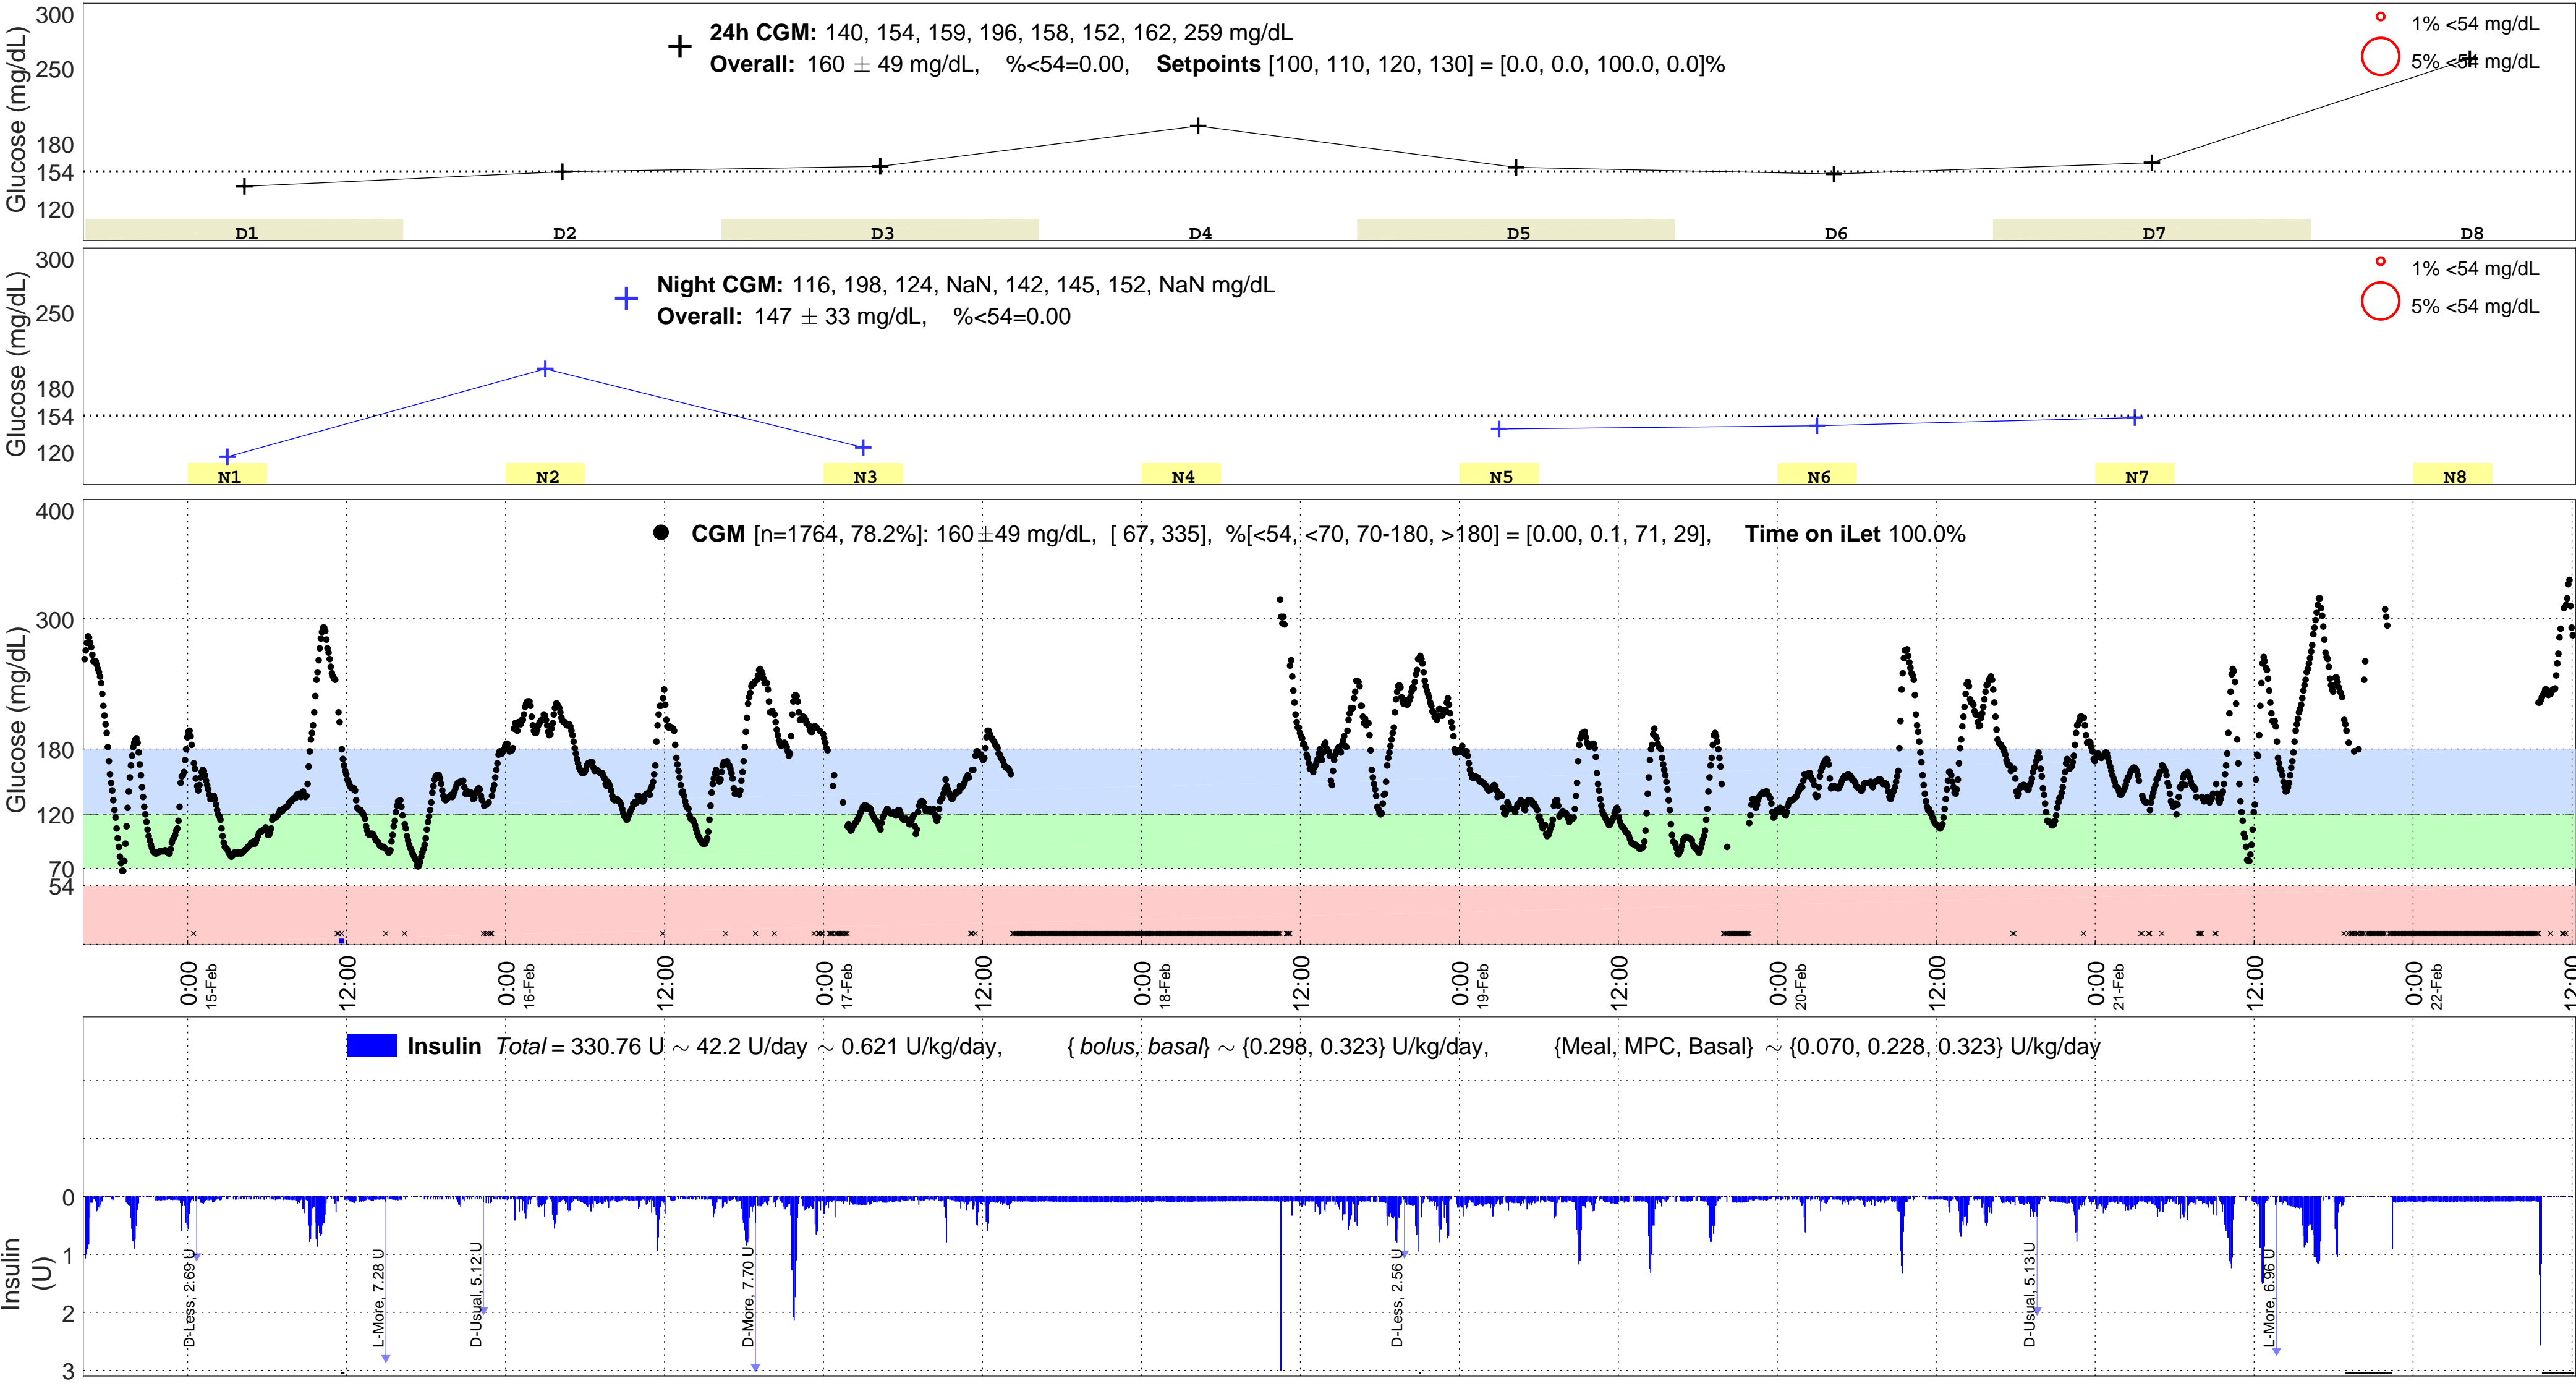

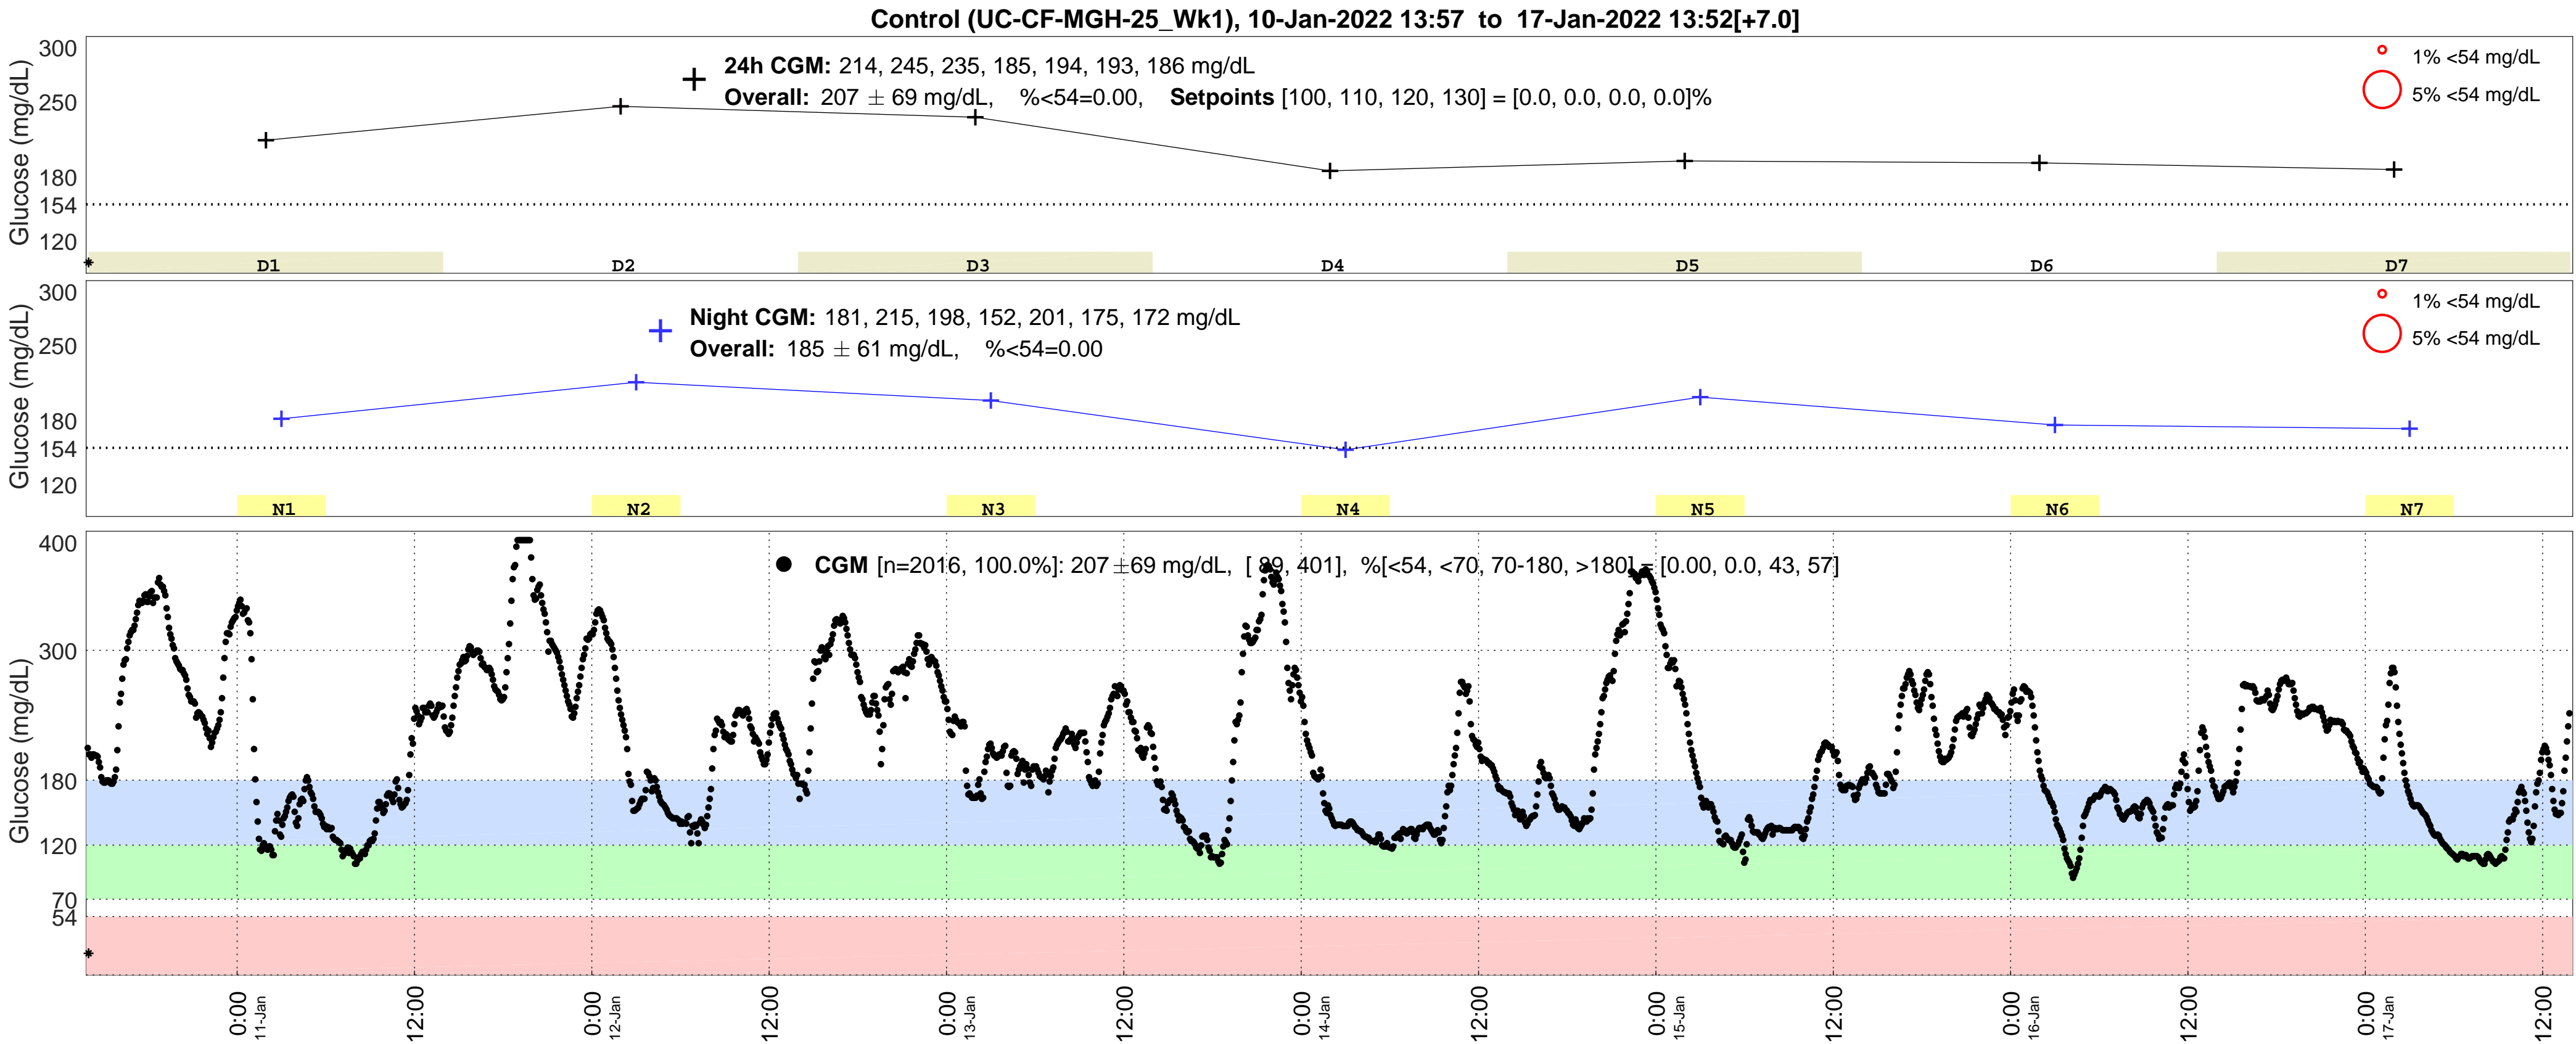

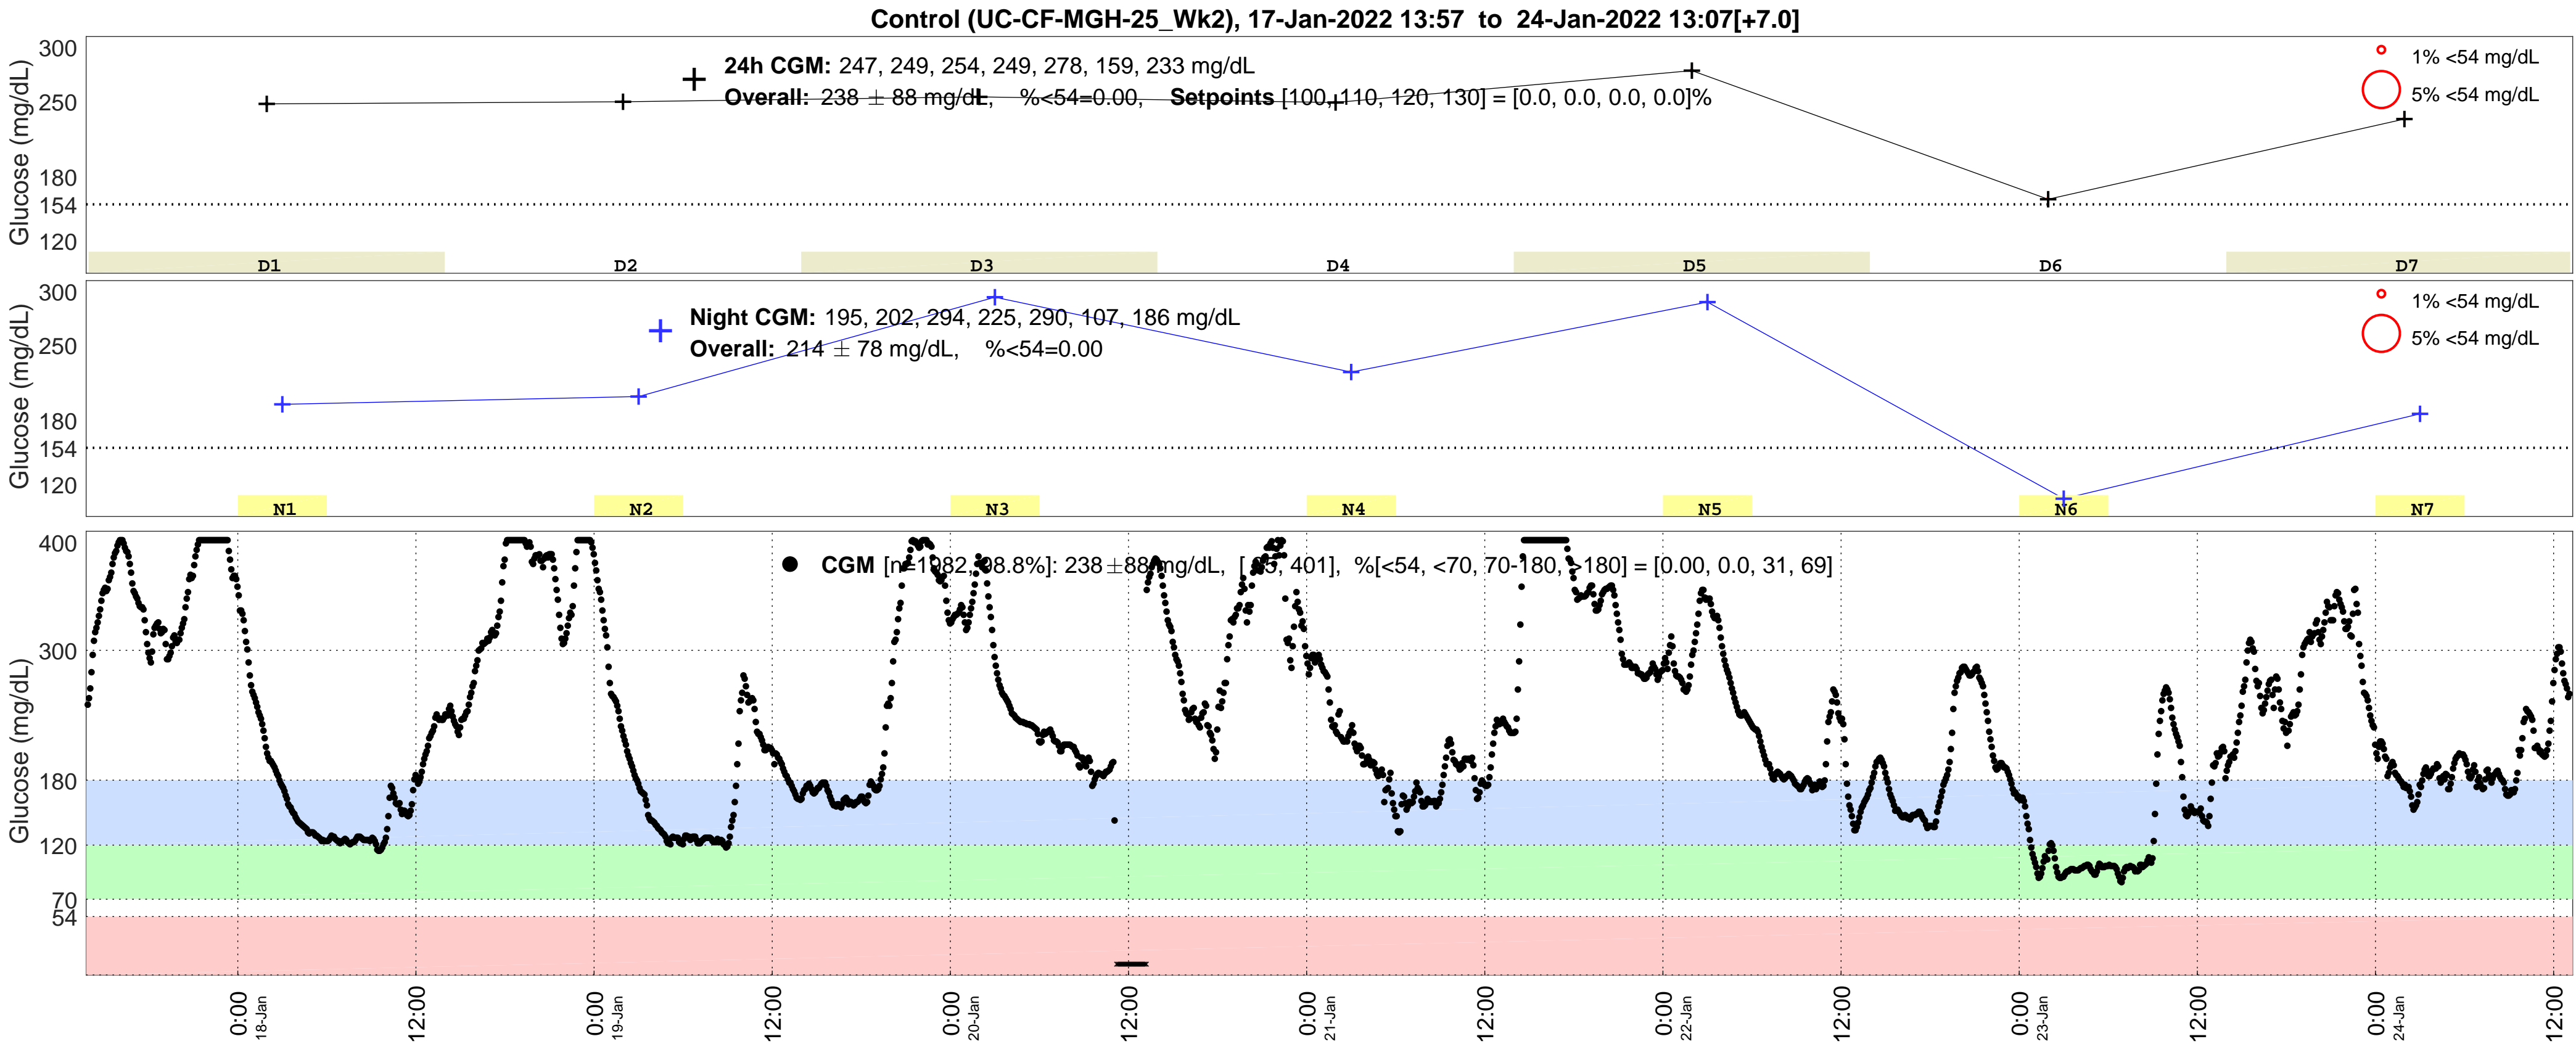

Bionic Pancreas (ID: CF-MGH-26-IM28\_Wk1, BM=88 kg), Insulin Only, 05-Apr-2022 14:39 to 14-Apr-2022 01:59[+8.5]

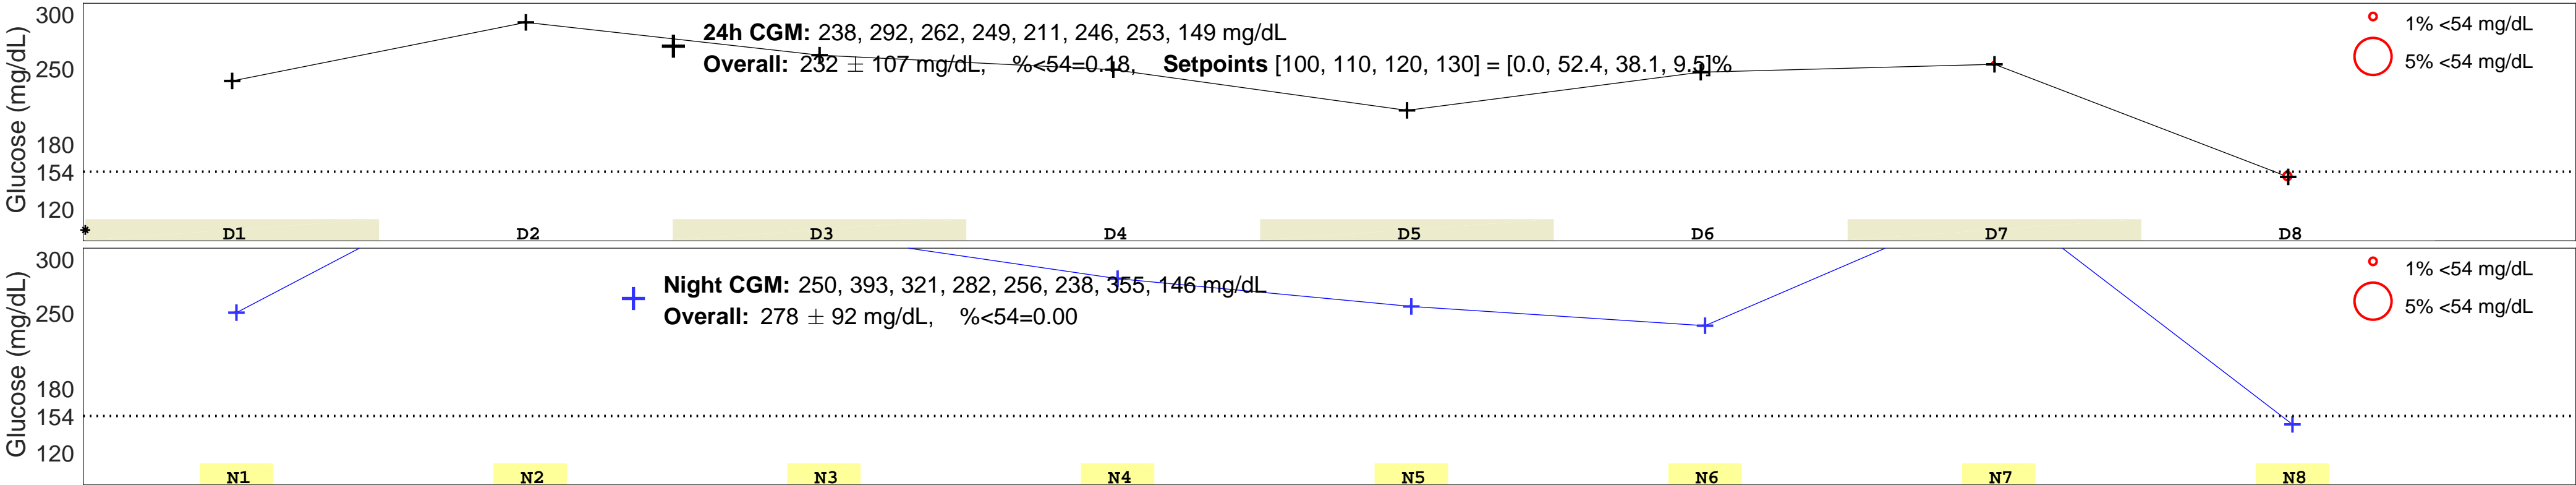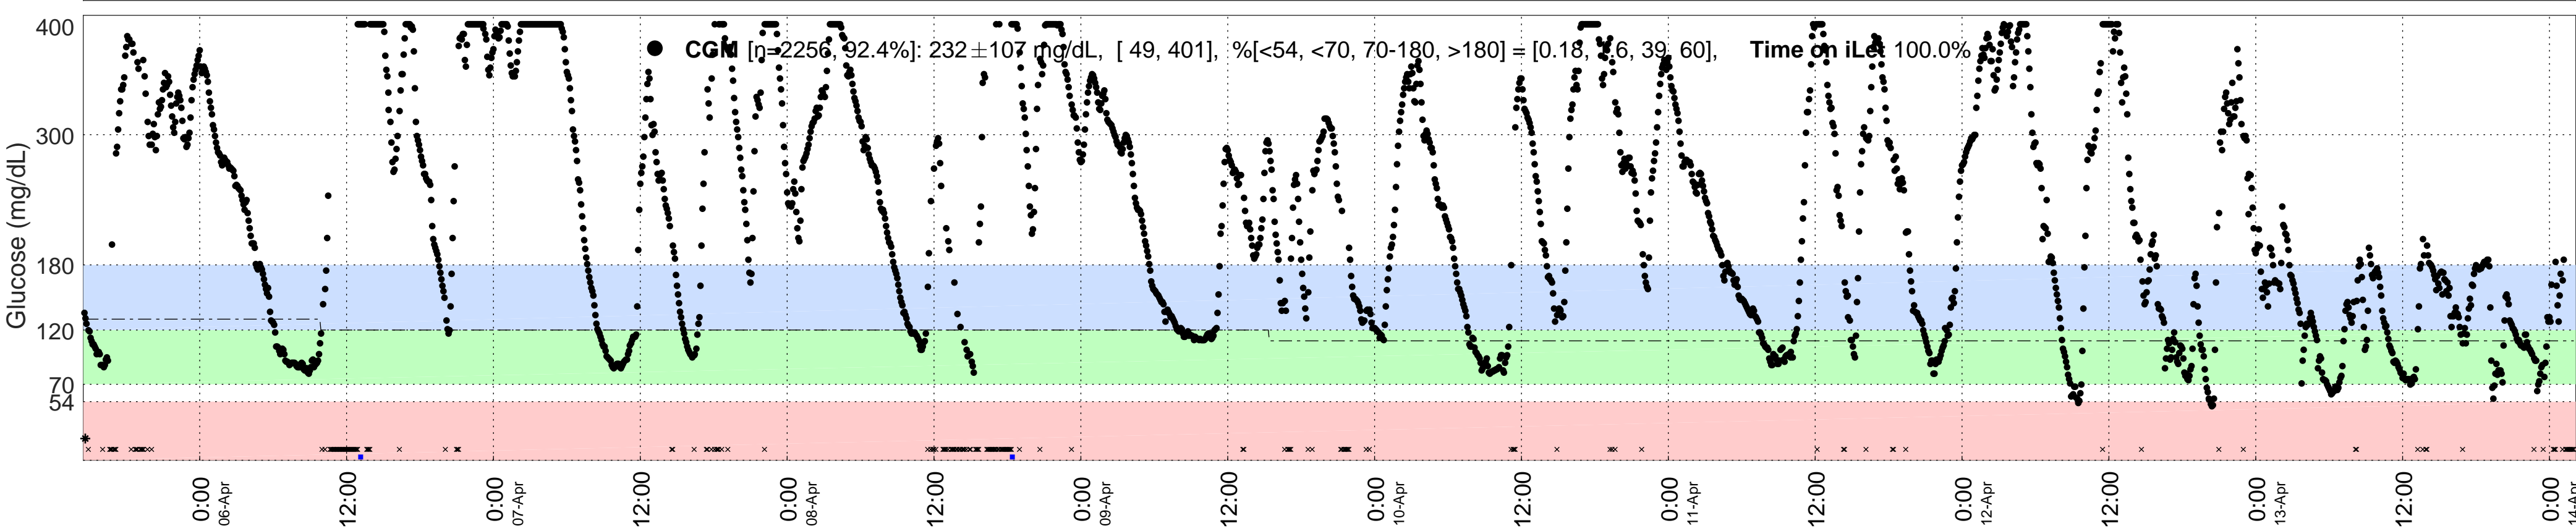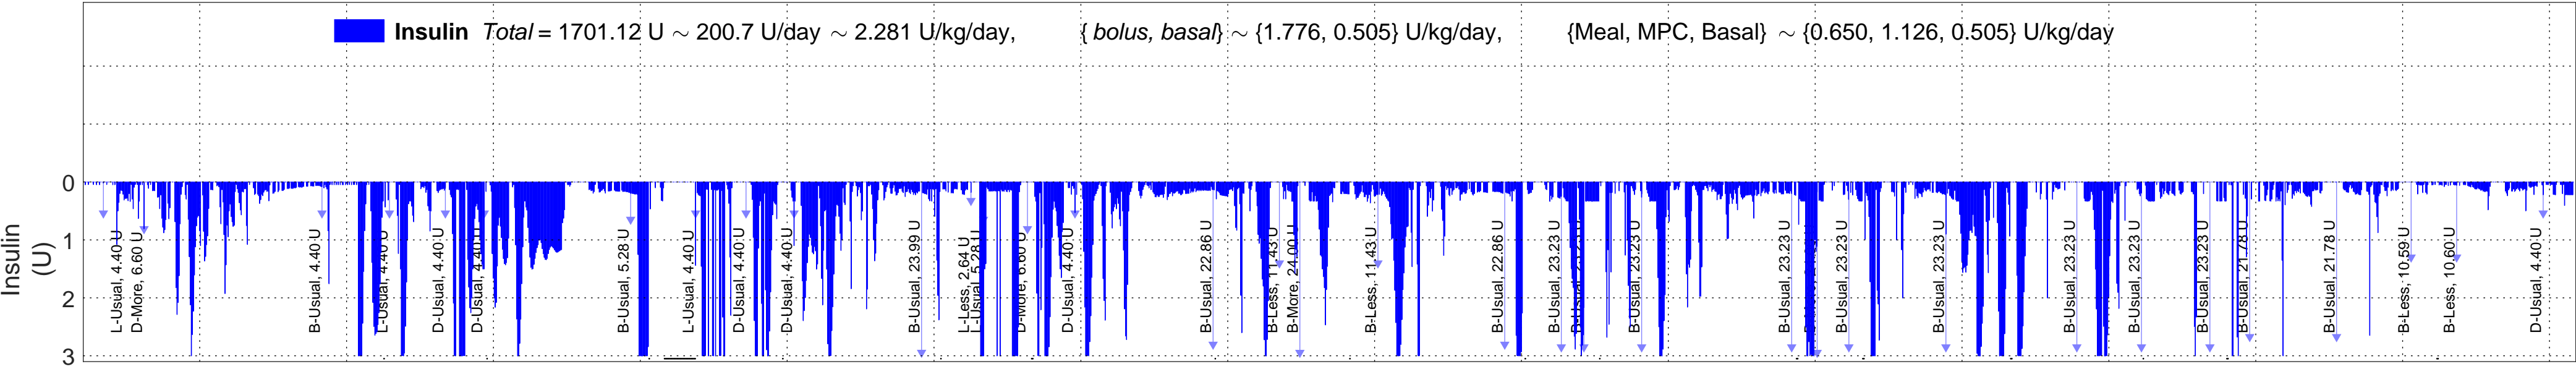



Bionic Pancreas (ID: CF-MGH-26-IM28\_Wk2, BM=88 kg), Insulin Only, 12-Apr-2022 14:39 to 14-Apr-2022 01:59[+1.5]

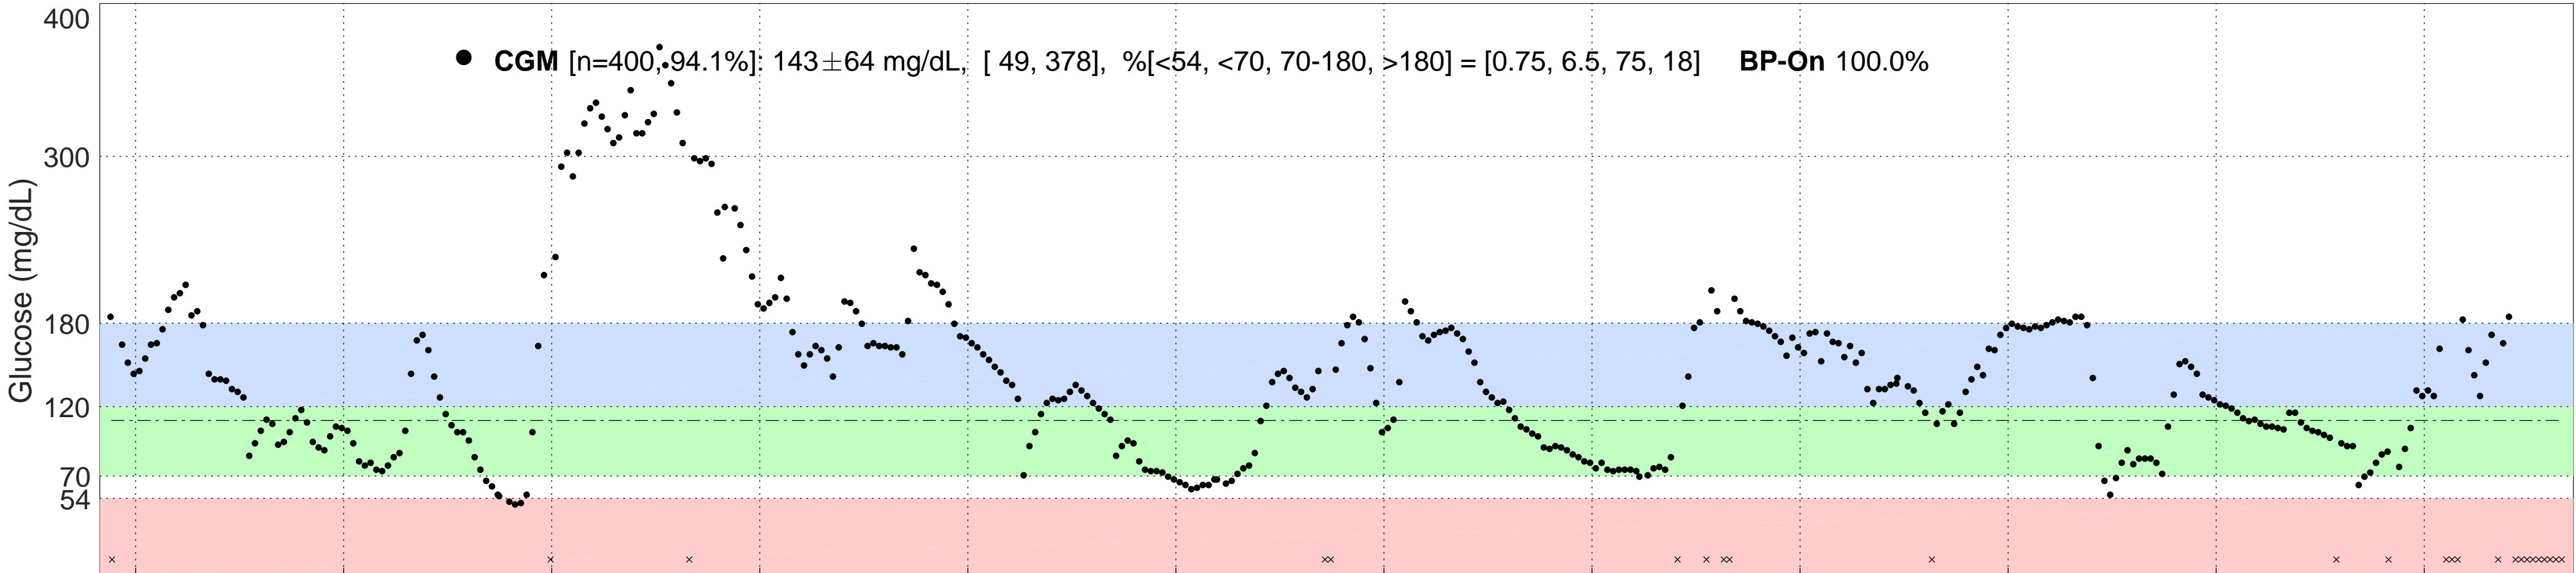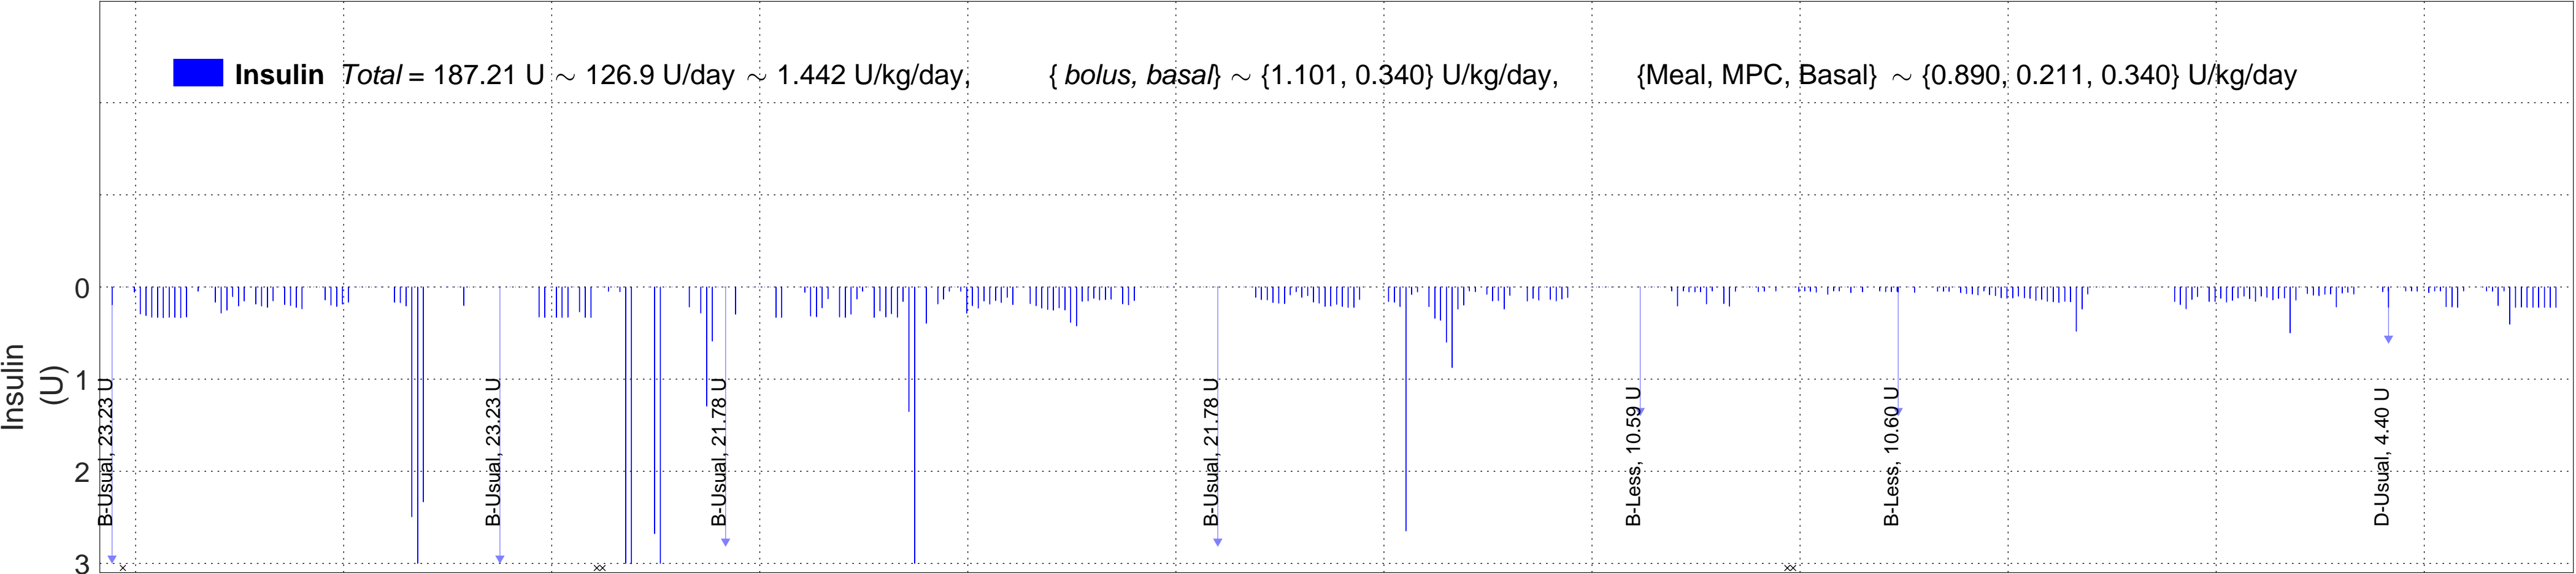

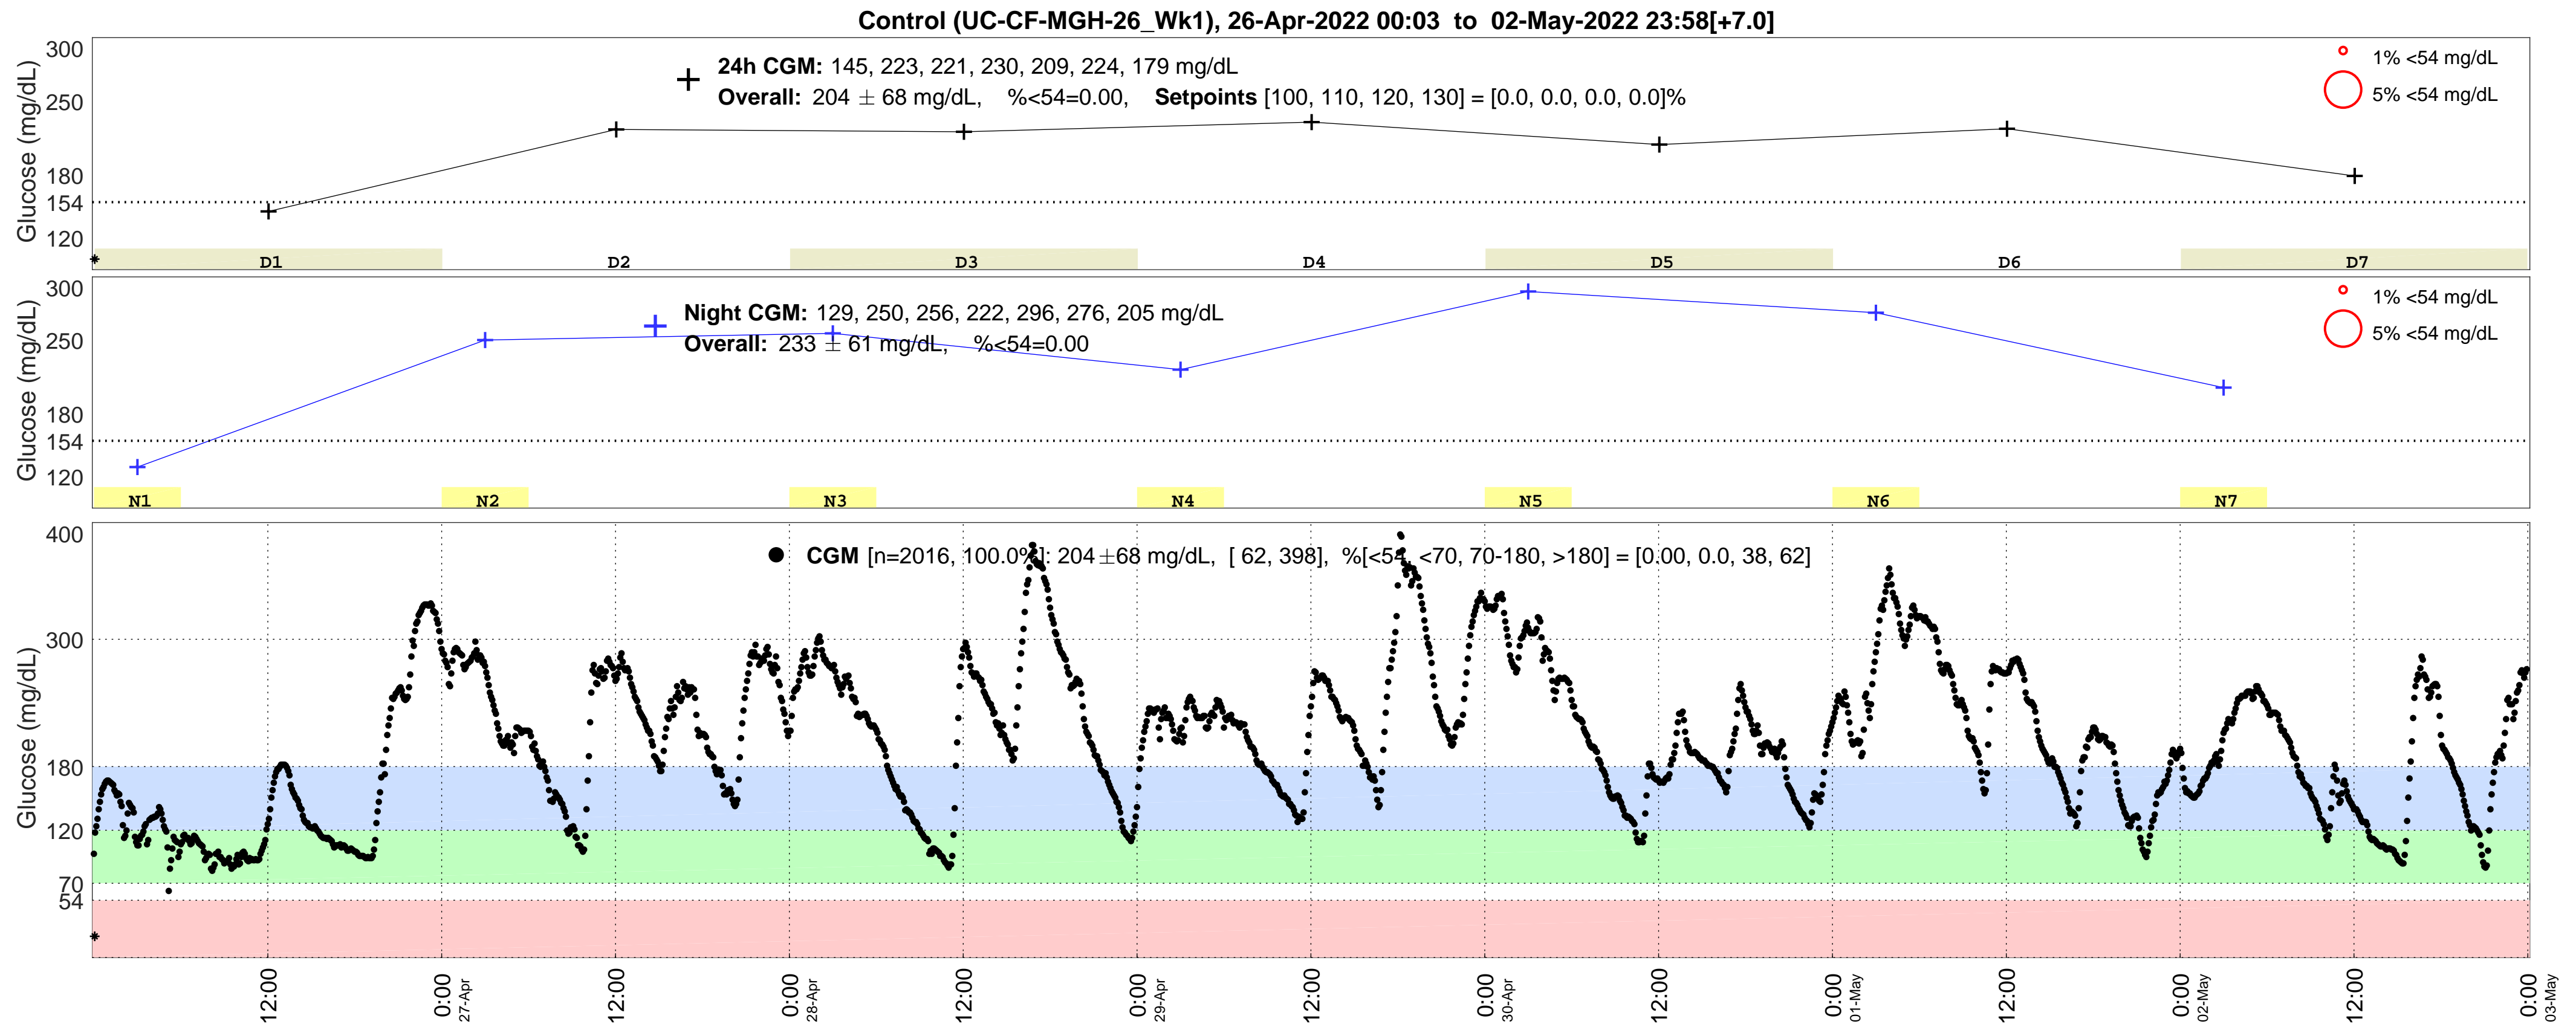

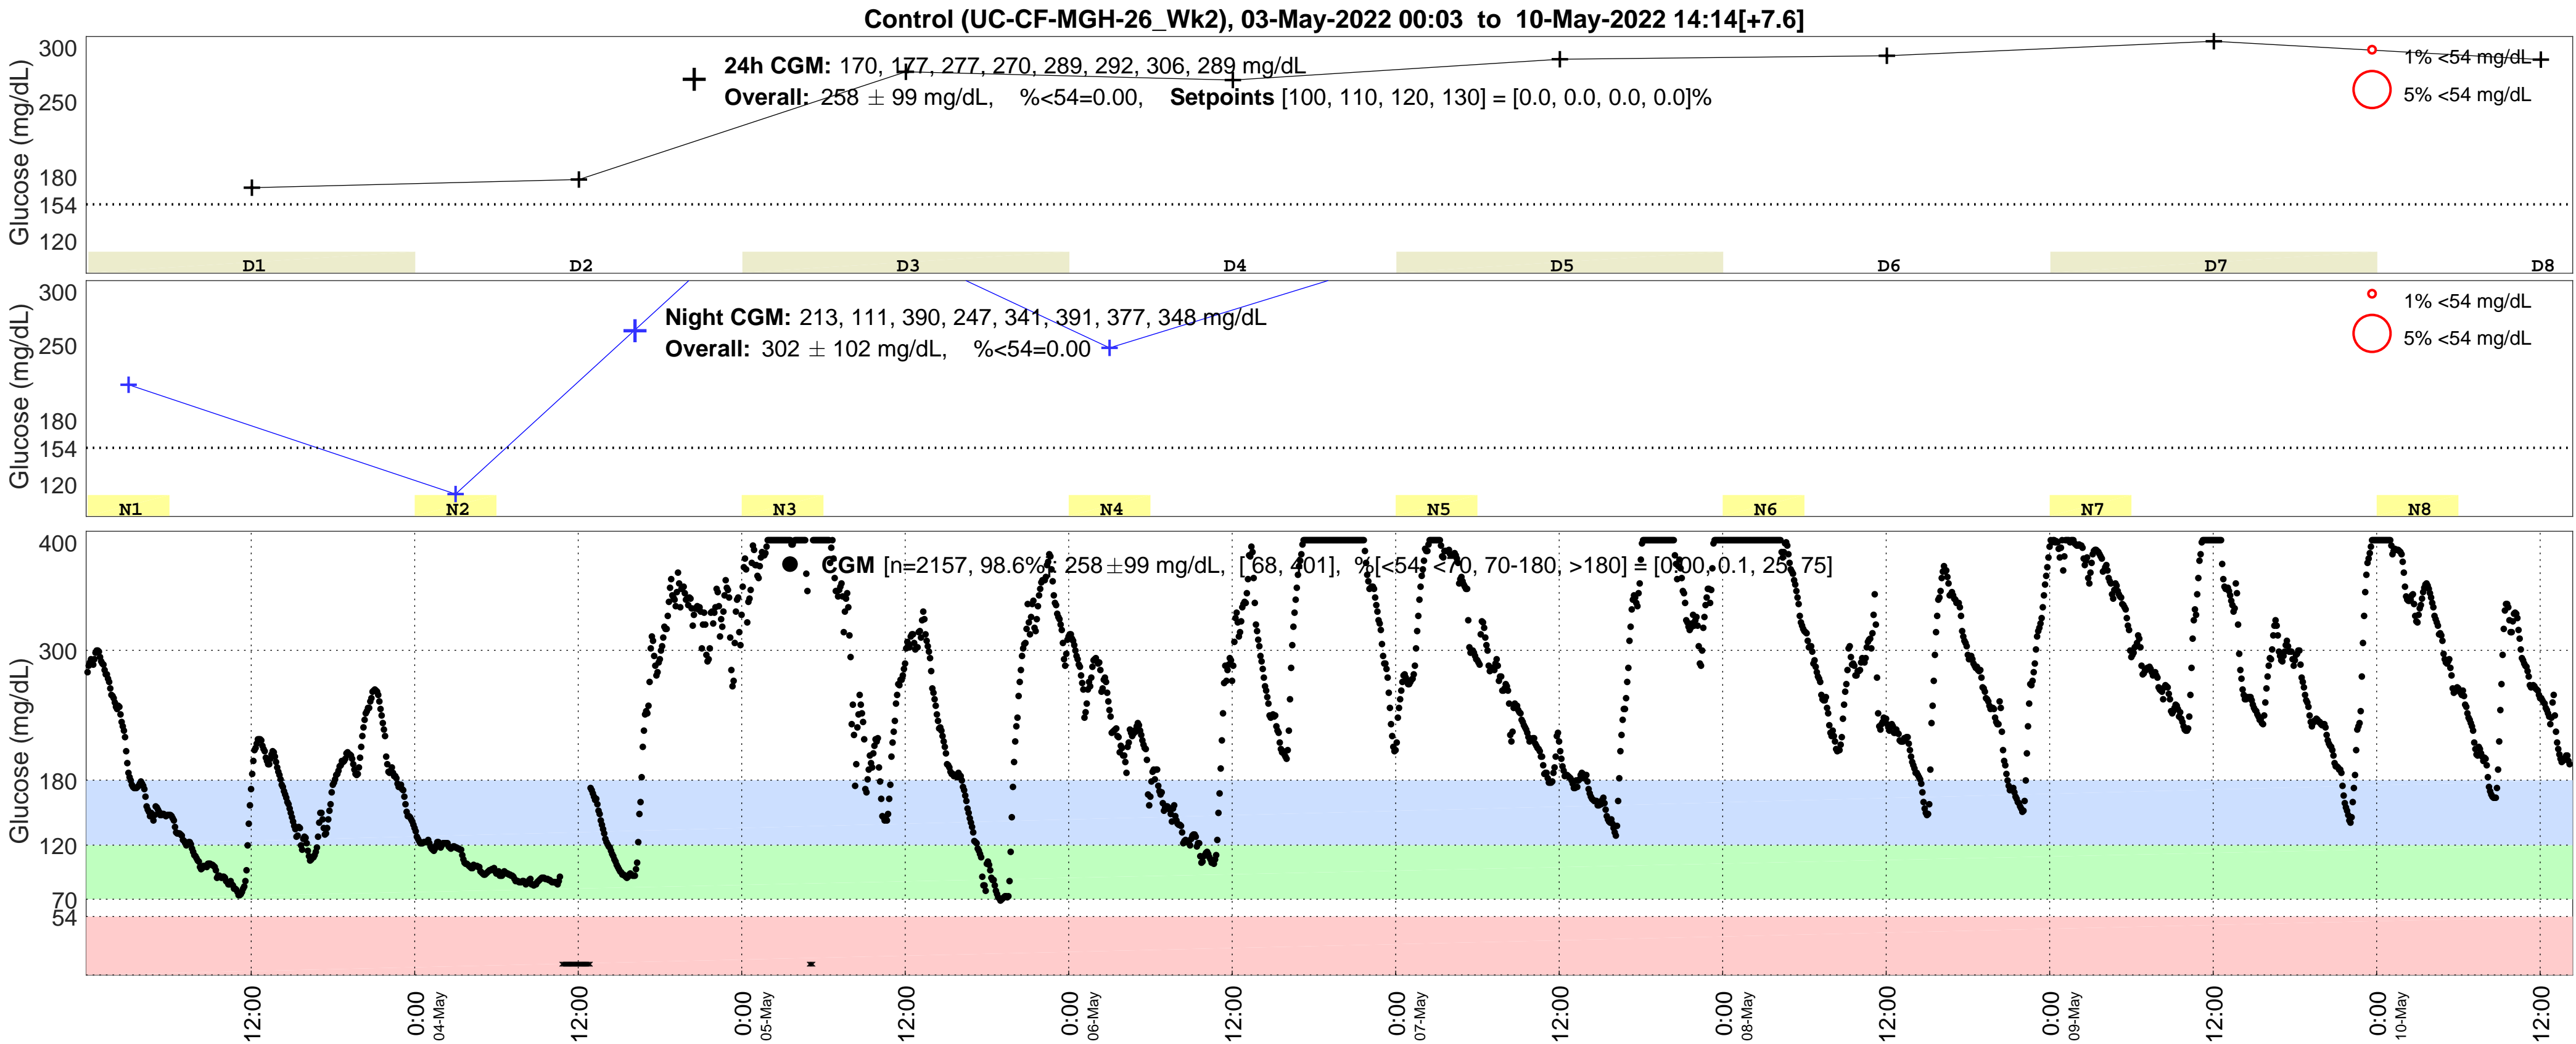

Bionic Pancreas (ID: CF-MGH-28-IM57\_Wk1, BM=66 kg), Insulin Only, 04-Mar-2022 13:21 to 11-Mar-2022 13:16[+7.0]

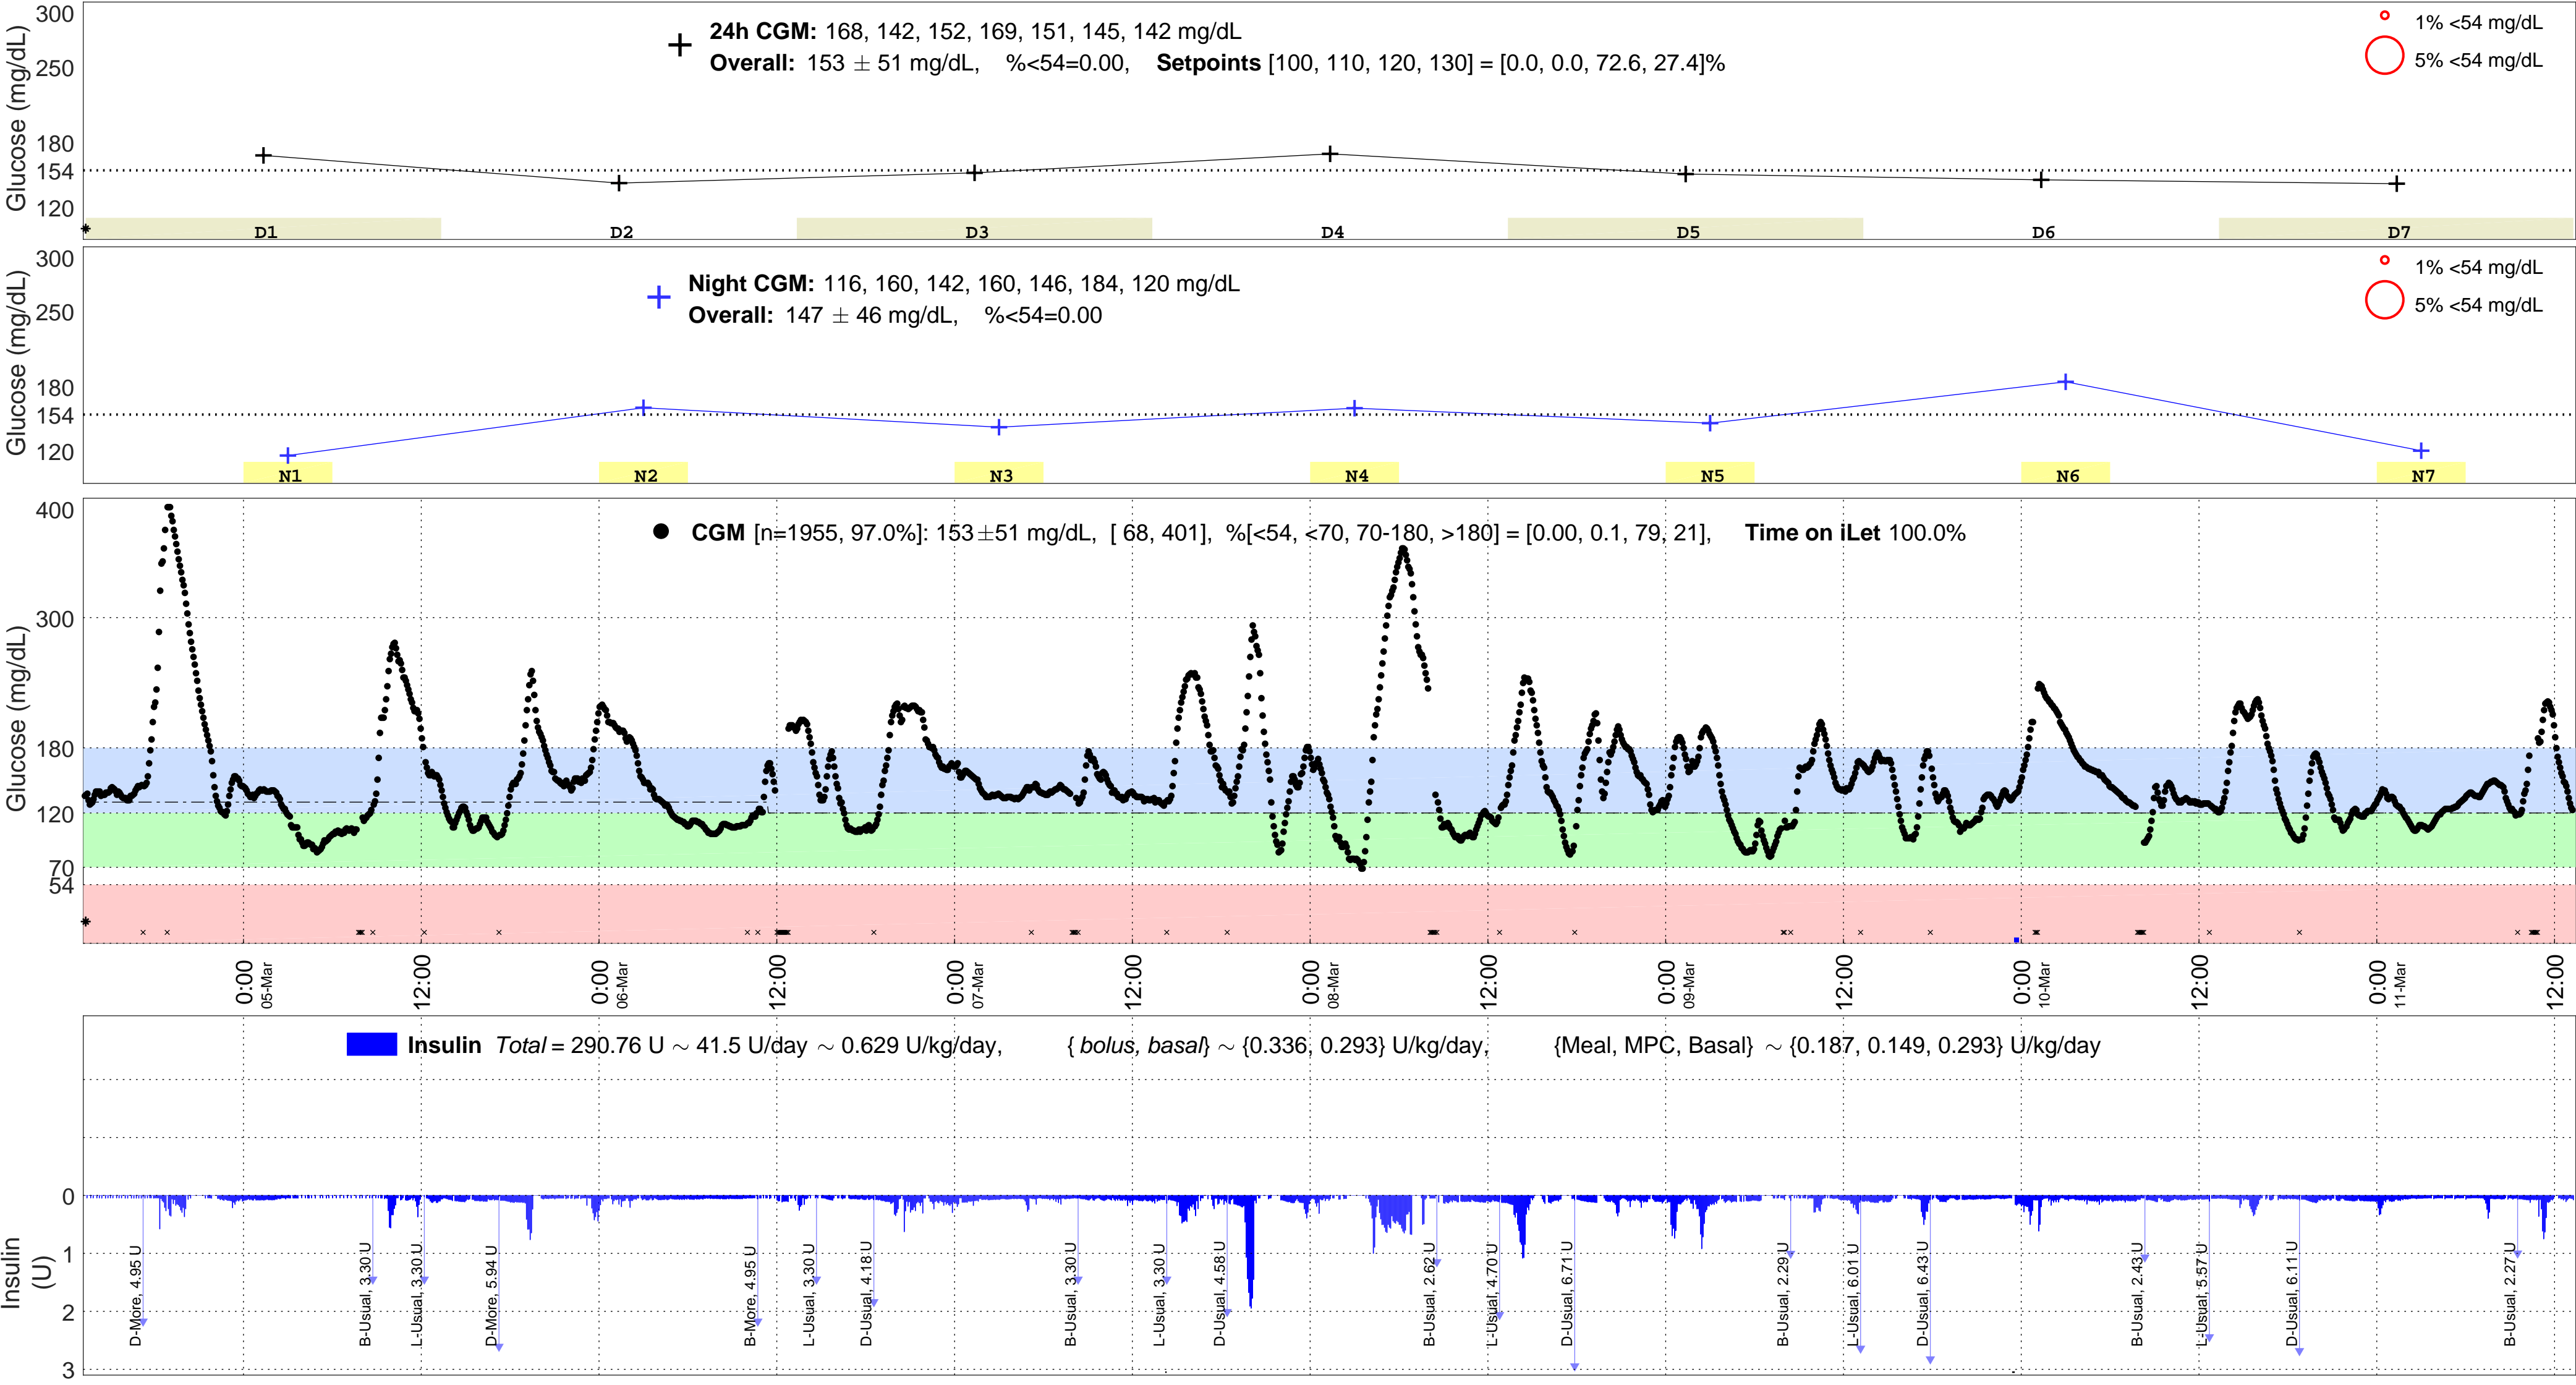





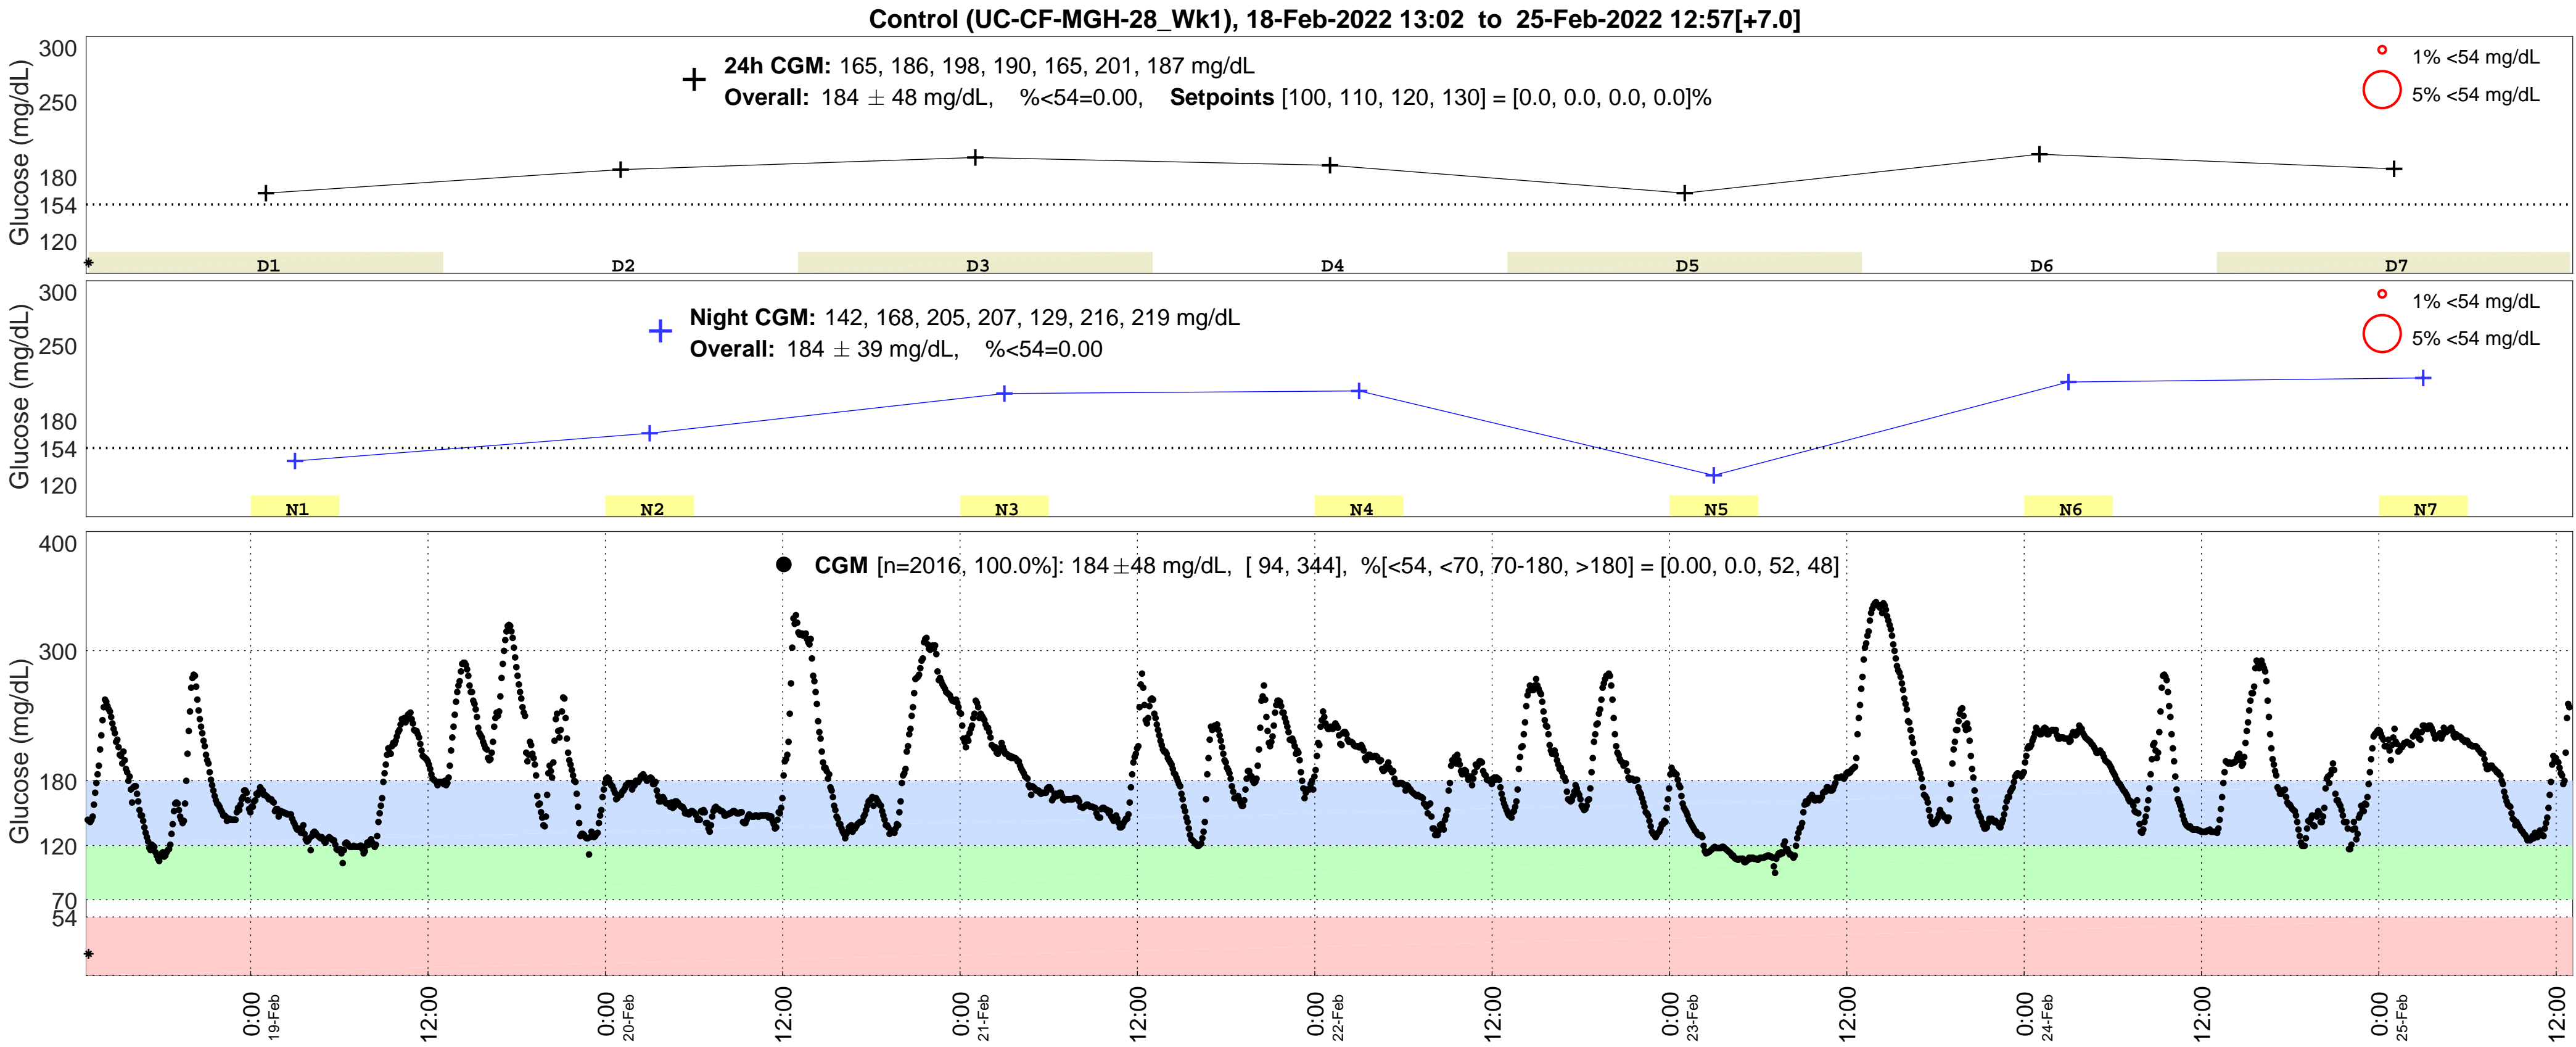

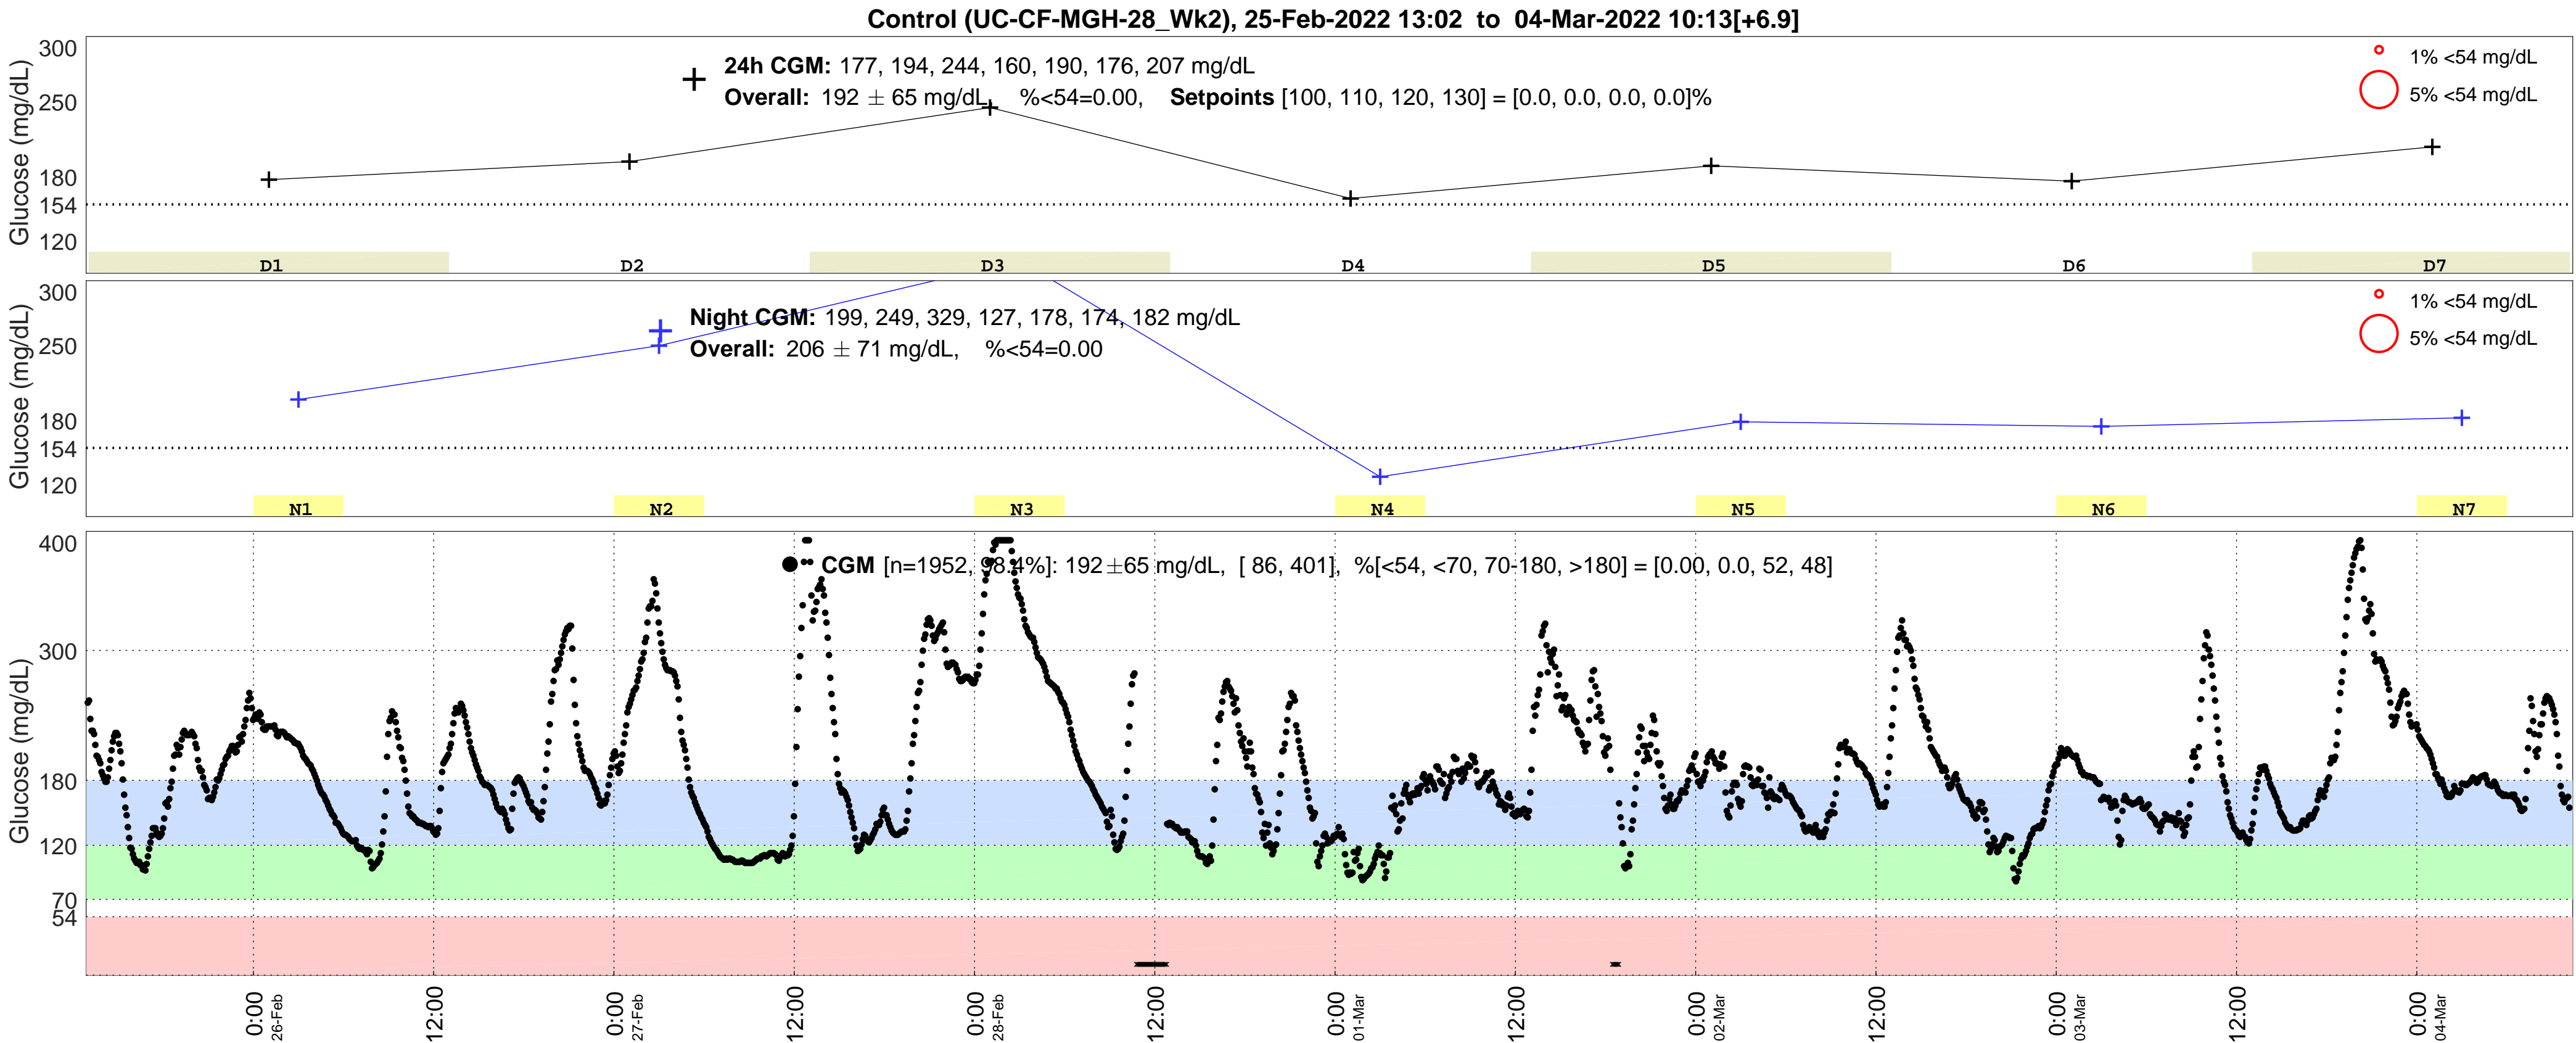

Supplement: Supplementary file 2 [file 1]
